# Supplementary material for: DCC regulates astroglial development essential for telencephalic morphogenesis and corpus callosum formation
Source: eLife. 2021 Apr 19;10:e61769. doi: 10.7554/eLife.61769 (PMC8116049; doi:10.7554/eLife.61769)
Supplement: Figure 1—source data 1. [file elife-61769-fig1-data1.xlsx]

## Sheet: Sheet1
Figure 1B: Ratio of IHF length / total telencephalic midline length in Dcc and Ntn1 mouse mutants
E17 DCC+/+	E17 DCC-/-	E17 Dcckanga+/+	E17 Dcckangakanga/kanga	E17 Ntn1-lacZ control	E17 Netrin1-lacZ	Adult C57	Adult Dcckangakanga/kanga
0.612916	0.93959	0.608012	0.797231	0.555519	0.928688	0.66748	1
0.616504	0.941149	0.584423	0.843966	0.554309	0.893917	0.691202	1
0.58724	0.797389	0.583441	0.917961	0.566668	0.951441	0.70775	1
0.609193	0.943618	0.563346	0.946894	0.575909	0.952648	0.519153	1
0.601619	0.854028	0.597456	0.947213	0.5872	0.871081		1
	0.94574	0.599053	0.938113	0.582491	0.921747		1
	0.931643			0.610691			1
				0.592177
				0.587814
				0.610418
				0.594959
