# Supplementary material for: DCC regulates astroglial development essential for telencephalic morphogenesis and corpus callosum formation
Source: eLife. 2021 Apr 19;10:e61769. doi: 10.7554/eLife.61769 (PMC8116049; doi:10.7554/eLife.61769)
Supplement: Figure 3—figure supplement 1—source data 1. [file elife-61769-fig3-figsupp1-data1.xlsx]

## Sheet: Figure 3-S3D
Figure S3D: Quantification of fluorescence intensity of β-DYST along 200 μm of the IHF surface in Dcckanga mice.
Wildtype β-DYST IF	Dcckanga/kanga β-DYST IF
1297.66	1006.76
780.411	1165.49
788.669	868.313
781.63	825.607
904.71	880.602

## Sheet: Figure 3-S3F
Figure S3D: Quantification of the fluorescence intensity of APC, N-CAD and β-CAT within 5 μm of the IHF in Dcckanga mice.
Wildtype APC IF	Dcckanga/kanga APC IF	Wildtype N-CAD IF	Dcckanga/kanga N-CAD IF	Wildtype β-CAT IF	Dcckanga/kanga β-CAT IF
1211.13	789.417	1267.38	961.356	974.217	630.911
1078.31	777.86	1159.14	1057.78	822.269	660.198
1158.48	1005.82	961.068	1021.25	661.119	831.366
907.518	771.487	922.356	959.194	662.308	722.949
1068.11	842.478	877.327	721.608	736.131	857.07
			731.733		839.484

## Sheet: Figure 3-S3G
Figure S3G: Quantification of the fluorescence intensity of Nestin-positive radial glial endfeet within 5 μm of the IHF surface in Dcckanga mice.
Distance (microns)	Wildtype NESTIN IF n1	Wildtype NESTIN IF n2	Wildtype NESTIN IF n3	Wildtype NESTIN IF n4	Wildtype NESTIN IF n5	Dcckanga/kanga NESTIN IF n1	Dcckanga/kanga NESTIN IF n2	Dcckanga/kanga NESTIN IF n3	Dcckanga/kanga NESTIN IF n4	Dcckanga/kanga NESTIN IF n5	Dcckanga/kanga NESTIN IF n6
0	509.148	570.296	833.148	438.889	619.37	580.185	694.778	473.185	700.852	801.741	673.037
0.552	500.519	550.074	794.148	432.37	707.889	621.667	710.111	506.815	668.63	817.148	634.111
1.104	492.852	550.074	698.704	466.37	816.482	657.407	720.259	540.778	619.593	853.704	585.963
1.657	498.63	574.185	537.704	500.852	931.852	651.852	775.593	596.333	611.037	914.111	555.185
2.209	527.518	587.482	445.963	515.037	1099.78	652.852	885.333	630.111	630.296	987.815	555.667
2.761	586.778	585.926	459.815	534.148	1169.44	665.407	950.667	638.407	606.037	1081.22	608.222
3.313	673.852	622.185	456.778	550	971.296	669.926	958.296	629.407	577.852	1127.93	736.111
3.866	771.482	691.074	450.815	566.222	805.518	701.222	856.111	613.333	542.704	1089.48	878.852
4.418	872.259	743.074	493.593	607.333	731.296	698.296	774.556	629.704	556.296	1030.52	982.593
4.97	927.518	769.704	523.852	603.037	687.111	719.111	755	664.222	567.482	1003.59	1008.37
5.522	884.482	728.778	532.963	590.556	663.593	699.593	778.037	691.185	554.778	1022.63	903.704
6.075	820.815	694	550.074	602.222	693.889	658.889	800.889	726.482	528.593	1092.56	790.741
6.627	828	694.37	519.63	567.37	722.667	623.296	822.333	759.407	518.407	1225.67	701.889
7.179	869.815	673.889	498.407	531.185	797	618.556	809	797.889	548.926	1390.15	634.407
7.731	940.963	655.185	485.852	501.296	809.185	647.963	827.37	827.148	586.074	1475.11	575.296
8.284	1087.82	628.518	526.222	483.852	733.185	726.852	760.667	801.37	612.407	1489.93	550.482
8.836	1293.85	576.815	539.556	506.111	731.185	697.074	718.667	738.185	637.37	1477.41	552.074
9.388	1405.63	519.482	552.815	537.148	758.407	671.074	740.963	746.704	646.148	1408.15	566.37
9.94	1322.07	516.185	595.741	543.704	771.037	649.333	763.852	804.889	655.889	1324.7	594.63
10.492	1124.44	533.407	698.889	528.593	722.704	629.741	725.963	936.37	651.259	1265.26	650.074
11.045	985.259	549.815	890.556	511.148	722.482	652.111	752.482	1034.59	666.407	1199	715.185
11.597	909.704	537.593	1189.82	512.185	748.518	684.667	814.074	966.296	752.926	1164	770.333
12.149	863.444	552.889	1531.74	544.556	824.852	743.111	867.407	819.444	822.926	1137.96	847.296
12.701	794.704	555.963	1213.15	593.667	1081.85	787.815	894.815	758.926	887.407	1100.85	902.148
13.254	724.222	521.407	826.852	707.593	1191.59	844.074	835.482	721.37	878	1065.74	887.111
13.806	700.778	525.259	674.926	852.296	900.148	909.074	776.593	709.593	862.852	1035.15	836.037
14.358	696.222	551.407	616.444	826.074	687.704	991.518	770.185	753.741	779.259	999.296	781.63
14.91	707.556	569.037	629.63	677.148	564.63	1057.15	759.111	795.222	726.037	976.259	733.482
15.463	730.63	578.556	664.593	619.037	544.852	1048.41	749.37	813.518	723.852	1005.96	749.704
16.015	707.815	572.148	733.593	616.037	568	1058.56	810.556	782.482	690.518	1086.26	945.037
16.567	621.963	527.926	812.259	627.037	628.074	1037.74	1029.93	719.556	646.815	1183.07	1236.07
17.119	543.37	526.815	850.963	585.556	667.963	1023.41	1276.96	714.741	644.556	1222.33	1454.26
17.672	508.852	546.111	808.518	622.518	643.333	965.815	1273.33	692.926	656.556	1174.11	1652
18.224	539.074	559.556	816.074	661.482	696.482	934.593	999.741	668.667	703.296	1044.15	1753.44
18.776	630.778	564.185	830.037	576.444	983.259	890.778	806.852	647.667	737.889	956.593	1551.82
19.328	768.148	583.333	804.185	543.593	1214.15	810.444	740.185	614.963	682.37	959.222	1126.15
19.88	930.37	655.037	794.333	590.63	1298.3	731.148	650.259	610.259	628.333	974.185	875.148
20.433	1037.3	709.815	845.815	683.815	1288.56	675.074	641.185	633.926	591.333	975	784.259
20.985	1030.11	738.111	889.074	774.037	1203.18	685.667	622.926	676.259	566.741	955.222	778.037
21.537	1009.7	764.815	714.296	831.704	1081.7	707.63	595.074	748.593	571.333	953.259	845.148
22.089	1083.41	782.296	608.444	851.296	911.444	720.444	590.778	763.185	584.518	998.815	945
22.642	1258.26	796.259	612.185	805.889	837.074	683.889	604.222	731.63	611.963	1063.07	1094
23.194	1505.82	830.222	648.593	764.259	775.185	610.074	633.222	699.185	611.741	1212.89	1088.33
23.746	1605.82	760.963	688.63	743.444	760.111	513.963	714.482	674.889	624.037	1482.11	950.111
24.298	1618.7	669.778	793.185	716.63	815.444	500.444	776.63	674	649.222	1718.22	814.185
24.851	1607.56	592.667	838.889	646.074	813.593	516.741	772.593	675.037	651.926	1771	823.259
25.403	1522.18	584	802.63	588.37	700.63	541.667	742.667	683.482	689.889	1632.52	833.111
25.955	1378.78	678.259	768.111	518.333	663.333	592.333	699.741	697.37	765.222	1418.15	882.593
26.507	1252.37	702.074	818.37	505.63	644.111	629.222	717.852	709.667	820.815	1241.82	927.778
27.06	1124	669.37	890.259	514.815	665.926	638.667	899.037	716.222	863.778	1166.52	965.37
27.612	999.148	729.37	965.482	559.518	721.148	662.815	1041.63	733.593	896.518	1147.22	1008.85
28.164	949.185	956.889	1054.33	737.259	804.222	679.444	1115	752.593	905.074	1149.82	1035.04
28.716	990.63	1159.67	993.518	913.444	859.963	679.296	1121.18	793.556	886.667	1181.07	1067.7
29.268	1068.04	1103.18	1066.48	897.667	795.185	675.667	1080.48	833.926	828.963	1230.7	1064.15
29.821	1106.41	986.037	1248.93	670.926	735.333	682.778	1002.3	887.852	724.593	1288.37	1034.26
30.373	1049.11	881.593	1455.82	566.741	710.074	695.333	942.222	845.333	661.852	1366.74	1010
30.925	967.741	887.444	1654.82	587.482	741.296	654.037	945.222	739.333	647	1394.63	948.815
31.477	927.407	967.407	1553.18	626.222	767.259	592.407	958.889	669.926	654.63	1314.7	900.222
32.03	924.926	1049.63	1353.93	646.963	816.963	549.296	1007.59	649.556	666.593	1194.7	851.926
32.582	930.222	1148.93	1071.48	680.259	874.704	533.926	987.074	647.741	633.333	1129.85	816.63
33.134	899.333	1281.89	845.148	646.556	889.889	546.444	959.111	655.518	624.778	1118.85	777.482
33.686	874.259	1291.78	729.963	610.111	895.185	493.222	940.259	669.482	617.556	1154.33	752.185
34.239	855.889	1218.78	689.518	546.556	827.518	433.074	952.63	732	636.037	1216.04	740.63
34.791	821.333	1118.26	617	543.593	803.259	417.481	1018.41	812.482	681.63	1265.37	732.37
35.343	781.815	1080.07	547.482	582.778	841	463.407	1051.18	891.778	723.482	1293.44	736.593
35.895	758.111	1019.63	525.741	600.407	868.037	517.148	1074.15	943.778	764.778	1294	753.222
36.448	751.704	890.704	531.63	555.815	851.074	566.852	1031.89	946	802.482	1268.04	758.704
37	754.482	802.815	571.667	548.815	834.111	611.704	927.556	953.667	816.667	1221.52	790.444
37.552	769.63	764.704	586.518	547.296	814.482	653.63	882.852	943.963	845.444	1193.74	834.444
38.104	829.963	702.037	667.741	573.963	759.63	642.222	937.333	935.37	905.704	1165.93	875.889
38.657	936.222	724.518	830.444	586.889	750.518	662	1001.78	894.926	983.222	1118.52	900.63
39.209	1054.96	850.259	966.889	602.778	733.111	691.037	1030.74	852.482	995.778	1049.44	948.259
39.761	1135.59	961.889	1098.48	607.963	722.704	709.482	1023.41	769.667	966.37	959.704	1042
40.313	1172.11	984.556	1145.44	597.778	772.926	718.185	1051.07	715.593	952.926	877.259	1117.18
40.865	1187.74	1005.44	954.889	641.37	739.074	734.407	1131.3	701.704	863.778	835.37	1094.04
41.418	1190.78	1138.18	770.259	687.185	714.889	737	1150.37	698.259	857.593	831.815	993.148
41.97	1158.89	1192.3	711.556	693.593	697.111	689	1127.96	694.63	901.926	853.63	865.185
42.522	1116.15	1063.04	715.704	720.593	674	611.852	1114.7	675.741	906.852	897.111	808.407
43.074	1078.44	971.296	714.778	713.926	715.074	551.593	1087.18	670.111	848	950.444	761.222
43.627	1027.33	1003.11	671.185	657.704	782.148	549.815	1067.26	672.518	780.074	1003.63	739.333
44.179	965.407	983.889	664.704	597.852	813.185	605.444	1020.74	651.111	725.37	1049.37	712.444
44.731	926.963	877.296	630.963	552.704	851.518	604.667	988.37	621.667	720.852	1077.11	695.111
45.283	918.185	801.37	693.407	528.63	862.296	608.667	969.185	614.926	719.556	1080.11	716.074
45.836	929.074	822.704	725.407	583.444	888.778	600	962	593.852	707.037	1074.33	715.963
46.388	982.111	884.889	691.222	703.815	879.037	595.741	944.37	572.444	707.333	1052.04	721.296
46.94	1076.67	949.889	738.407	812.593	855.963	631.111	976.37	587.185	721.111	1016	749.518
47.492	1163.93	1082.41	825.593	753.185	813.778	698.778	953.667	595.704	734.518	1013.7	798.111
48.045	1255.74	1209.18	818.852	687.148	737.111	834.63	991.074	581.704	765	1071	837.444
48.597	1318.63	1153.56	772.185	626.963	652.333	861.037	1139.59	565.222	771.63	1208.78	874.667
49.149	1333.82	990.667	696.407	604.482	653.222	850.407	1306.78	563.63	788.667	1410.15	881.852
49.701	1360.96	868.222	687.185	605.222	717.444	818.63	1315.89	569.926	783.407	1589.04	874.556
50.253	1361.82	786.259	634.926	638.63	910.407	797.593	1263.26	596.518	810.333	1689.96	892.963
50.806	1347.59	756.889	620.037	704.667	1016.18	714.926	1201	651.518	855.185	1741.82	861.333
51.358	1310.15	732.593	679.704	786	917.63	726	1138.15	697.37	843.593	1757.48	821.593
51.91	1174.41	713.667	729.852	916.444	846.407	774.148	1084.82	709.111	859.222	1703.78	822.037
52.462	1006.37	705.074	748.296	1004	876.444	760.222	1068.11	716.185	874.074	1615.22	828.889
53.015	904.704	725.778	873.889	987.556	899.444	801.259	976.518	738.963	911.704	1519.67	817.778
53.567	860.926	854.37	984.074	875.556	942.815	802.889	864.556	768.778	949.852	1402.15	782.111
54.119	848.889	1036.41	1057.59	779.037	954.704	786.222	755.63	765.185	980.593	1334.59	779.518
54.671	851.778	1164.52	1022.41	729.63	1022.15	735.444	694.852	735.593	1042.11	1317.63	794.222
55.224	866.259	1137.59	1034.82	713.037	1023.85	743.815	694.852	704.667	1197.22	1298.07	812.333
55.776	870.926	970.482	1014.15	745.037	1058.33	741.815	689.482	685.407	1231.11	1314.93	773.037
56.328	876.518	847.556	1036.78	766.593	1117.52	708.111	676.148	690.296	1120.33	1390	792.148
56.88	910.333	807	1169.41	723.963	1113.59	632.148	675.482	723.741	1091.85	1443.7	893
57.433	963.259	802.667	1227.93	698	1118.93	608.482	683.741	768.482	1083.48	1386.33	1047
57.985	1004.18	796.333	1012.37	740.482	1104.11	612.556	719.333	803.889	1031.85	1242.89	1315.44
58.537	992.482	800.333	882.185	823.333	958	640.111	841.889	840.37	1053.3	1132.93	1744.04
59.089	952.296	832.667	890.741	805.037	830.111	642.111	1112.67	840.37	1188.74	1051.59	2041.07
59.641	939.259	919.482	924.444	810.111	750.926	648.296	1331.63	775.037	1488.85	946.593	1866
60.194	962.259	1071.67	951.926	698.111	712.704	675.889	1079.67	715.074	1676.48	876.111	1422.96
60.746	977.37	1229.89	985	641.889	663.444	733.852	868.889	675.593	1286.7	892.815	1128.85
61.298	985.185	1301.96	1021.89	653.37	679.185	741.037	787.889	665.926	1017.33	949.037	1037.11
61.85	973.778	1263.96	1047.3	717.482	767.259	707.333	788.704	650.111	883.741	1029.56	997.333
62.403	956.815	1235.56	1082.33	964.518	929.667	663.185	809.926	629.704	826.963	1149	921.63
62.955	996.148	1197.7	1033.41	1264.48	922.926	646.593	771.444	631.111	828.296	1263	876.778
63.507	1079.11	1095.63	740.556	1206.74	727.593	632.593	722.148	623.518	811.111	1305.3	900.926
64.059	1117.59	987.444	616.63	996.37	617.778	654.074	706.111	619.407	821.37	1289.41	955.407
64.612	1118.22	857.815	546.852	1005.78	567.222	678.704	679.037	628.333	805.148	1275.44	1044.85
65.164	1091.74	762.704	514.37	1018.52	556.333	690.815	705.222	645.667	794.778	1286.63	1137.78
65.716	1072.74	711.185	543.63	901.518	571.556	690.518	730.407	680.704	809.63	1300.18	1184.07
66.268	1052.11	694.778	602.185	813.185	603.963	729.926	730.333	722.037	850.815	1318.59	1150.48
66.821	1044.93	681.852	686.778	879.63	688.741	786.148	706.963	733.778	850.296	1336.07	1133.89
67.373	1058.37	669.815	698.259	906.296	815.963	803.741	663.704	758.259	880.222	1361.37	1264.63
67.925	1077.74	731.074	720.37	899.926	928.926	870.259	638.926	783.556	915.741	1401.56	1454.37
68.477	1091.56	861.148	768.889	832.444	1000.33	942.296	621.482	812.556	996.074	1470.59	1457.59
69.029	1114.96	951.593	757.444	776.667	1027.63	971.296	607.926	832.778	1137.11	1574.11	1341.59
69.582	1129.93	911.704	746.963	702.556	991.037	956.667	624.815	848.444	1163.56	1639.85	1277.96
70.134	1094.18	851.518	760.963	658.296	948	936.407	657	882.37	1134.18	1636.96	1234.67
70.686	1048.07	824.185	842.222	647.741	908.63	920.222	738.667	915.148	1109.22	1548.96	1138.33
71.238	1051.89	818.778	919.741	664.037	907.815	806.667	812.222	953.741	1101.26	1362.33	1010.11
71.791	1099.33	854.074	974.889	746.63	908.482	684.444	796.222	975.852	1114.82	1141.78	935.741
72.343	1131.11	983.185	1034.59	779.518	917.222	602.259	760.444	998.852	1146.93	986.518	898.852
72.895	1078.3	1073.59	1053.52	792.963	959.185	586.333	730.852	1022.07	1146.18	915.444	906.407
73.447	1046.7	1032.11	787.37	778.37	993.852	614.037	711.37	1094.85	1136.04	900	918.963
74	1073.78	952.815	679.963	770.148	1041.07	672.074	702.185	1181.96	1201.74	897.333	892.333
74.552	1101.04	920.667	693.889	753.815	1047.89	687.037	675.926	1174.59	1261.7	899.333	900.407
75.104	1070.22	891.37	781.556	713.296	1050.26	681.148	658.259	1095.3	1212.52	907.333	943.889
75.656	1044.41	856.259	939.074	676.741	987.741	677.111	655.963	1006.48	1119.59	918.074	1040
76.209	1065.11	820.593	1004.56	667.963	911.963	634.741	718.889	927.222	1059.63	926.963	1178.11
76.761	1115.93	779	1021.67	698.444	866.889	618.593	816.333	840.148	1073.63	966	1275.04
77.313	1189.22	755.222	999.815	719.852	851.148	615.741	956.444	760.222	1109.26	1020.74	1309.7
77.865	1246.33	756.407	959.185	698.37	860.185	628.296	1133.04	702.037	1134.04	1072.7	1322.85
78.417	1273.48	804.704	902.667	687.926	842.222	649.963	1255.74	688.444	1090.85	1137.82	1336.11
78.97	1296.18	918.444	814.259	714.222	856.963	680	1033.41	693.518	1070.82	1180.63	1339.63
79.522	1337.63	1009.15	772.556	720	849.482	692.444	834.704	701.37	1047.59	1197.3	1317.67
80.074	1419.7	1087.33	784.074	713.63	874.704	681.444	719	733.593	1038.74	1194.22	1258.85
80.626	1481.26	1105.7	805.185	764.963	851.518	657.852	689.556	784	1018.56	1185.26	1132
81.179	1503.41	1044.3	807.963	830.37	812.741	705.852	726.778	810	1072.37	1186.33	1002.15
81.731	1508.67	983.37	803.593	870.037	821.333	778.037	801.148	829.482	1148.78	1187.15	941.037
82.283	1479.44	1045.59	872.148	952.889	832.333	791.333	806.407	816.296	1157.67	1149.04	965.296
82.835	1443.82	1145.74	966.889	962.407	828.963	771.185	776.111	759.704	1122	1084.82	1057.33
83.388	1450.41	1078.44	972.963	867.37	774.889	727.593	748.333	679.926	1093.37	1023.33	1186.26
83.94	1468.22	944.482	1065.37	891.407	785.185	712.037	752.296	631.556	1054.22	1048.85	1314.41
84.492	1503.78	910.518	1165.04	1003.26	815.148	692.222	738.926	615.518	1031.3	1143.11	1396.52
85.044	1487.44	931.482	1228.59	1201.41	838.741	688.037	738.037	627.741	988.889	1242	1435.93
85.597	1411.7	997.222	1215.52	1343.7	879.926	691.852	747.63	627.444	955.407	1320.96	1592.18
86.149	1343.04	1051.37	1094.63	1430.67	985.222	694.741	753.926	623.593	1052.04	1322.48	1763.18
86.701	1278.59	1049.59	1056.67	1437.56	1044.85	703.111	722.852	640.518	1092.89	1222.74	1880.3
87.253	1215.15	1043.56	1028.3	1310.59	1032.85	740.926	714.037	664.222	1062.18	1064.48	1842.59
87.805	1161.78	1072.44	972.037	1075.48	1001.52	789.593	734.296	674.185	1026.59	926.852	1560.15
88.358	1143.44	1081.52	940.37	931.259	966.296	882.778	732.148	693.926	1019.74	865.111	1293.78
88.91	1152.96	1077.22	923.518	887.556	936.778	857.926	741.185	723.444	1023.48	871.926	1149.56
89.462	1168.59	1120.56	895.556	812	897.741	808.852	747.444	761.333	1046.93	903.815	1066
90.014	1210.63	1123	882.667	827.148	846.37	766.259	749.889	813.667	994.111	942.852	1012.18
90.567	1256.67	1116.59	926.148	757.185	819.259	758.482	751.778	838.333	975.074	995	976.852
91.119	1254.33	1057.18	963.259	761.148	839.556	734.185	770.482	860.852	947.185	1016.26	945.444
91.671	1246.67	932.852	963.667	775.889	868.037	724.704	753.593	894.704	943.963	988.852	932
92.223	1246.93	853.667	987.556	845.889	900.482	697.037	740.074	933.37	983.37	943.259	953.333
92.776	1256.41	852.185	1030.04	861.074	915.111	658.926	775.222	934.259	1101.44	918.741	965.296
93.328	1256.22	834.815	1111.41	895.37	927.333	633.815	858.074	916.296	1192.15	915.482	934.778
93.88	1227.89	840	1147.89	896.407	931.185	628.667	972.259	877.889	1233.11	935.074	895.926
94.432	1168.3	825.63	1185.22	875.704	884.889	601.37	1014.33	820.074	1219.93	960.963	867.556
94.985	1145.07	813.407	1196.22	921.037	917.407	569.815	1005.11	764.556	1199.15	971.444	859.704
95.537	1168.07	785.222	1096.22	898.259	937.074	570.222	975.815	720.852	1127.44	959.111	875.556
96.089	1221.48	755.074	1022.33	889.667	1011.11	598.518	843.259	714.556	1115.67	948.37	932.704
96.641	1287.56	800	1020.78	857.074	1088.74	630.37	779.815	707.63	1103	935.667	926.518
97.193	1318.48	907.444	1051.26	895.482	1082.3	659.63	757.222	736.259	1121.7	939.407	930.889
97.746	1325.52	989.407	1040.52	862.37	1091.22	720.148	752.037	751.63	1193.33	971	969.593
98.298	1307.96	1034	1055.44	845.074	1084	773.704	786.37	775.667	1247.67	1000.59	1014.59
98.85	1261.07	1070.48	1093.15	852.37	1014.93	787.482	807.778	847.667	1249.59	1052.89	1074.78
99.402	1206.7	1093.85	1129.3	816.222	1020.93	805.185	795.556	910.37	1282.7	1108.74	1160.96
99.955	1171.85	1075.82	1195.33	775.741	1027.04	775.889	721.37	990.111	1408.85	1148.3	1235.52
100.507	1173.07	1134.18	1220.89	728.482	1084.85	746.185	691.407	1029.52	1514.52	1170.96	1220.59
101.059	1172.37	1179.63	1252.93	667.259	1049.04	698.037	688.815	1061.41	1476	1196.11	1166.82
101.611	1136.18	1234.26	1232.82	661.111	1017.41	641.444	685.556	1066.15	1325.85	1235.48	1105
102.164	1118.85	1305.82	1264.96	689.889	967.111	618.185	661.296	1065.96	1209.74	1262.85	1045.56
102.716	1136.52	1290.96	1261.07	792.518	951.111	580.407	651.741	1034.37	1202.26	1237.22	987.259
103.268	1210.18	1218.18	1327.7	891.074	933.704	576.704	653.667	994.333	1194.82	1181.63	962.704
103.82	1312.18	1119.59	1363.26	974.407	891.482	594.259	670.074	970.741	1142.26	1114.41	1003.48
104.373	1397.56	1091.59	1368.52	1014.44	873	625.037	670.296	939.778	1082.33	1092.26	1072.07
104.925	1484.93	1111.18	1402.26	1043.82	921.185	629.444	637.778	861.667	1031.82	1079.18	1157.48
105.477	1576.56	1138.89	1460.82	1131.96	933.37	589.074	605.074	813.111	1063.11	1039.85	1202.67
106.029	1596.37	1164	1424.44	1231.59	944.963	579.111	586.518	771.111	1083.74	980.926	1239.22
106.582	1563.26	1129.74	1183.07	1163.41	979.074	586.741	573.704	756.852	1198.74	923.63	1294.89
107.134	1495.15	1084.33	1040.26	1052.33	1021.3	632.778	604.741	746.222	1316.3	887.518	1248.15
107.686	1425.33	1052.22	933.111	997.667	1070.59	671.111	594.556	702.296	1254.07	886.037	1108.15
108.238	1360.63	1030.37	839.741	970.482	1077.07	700.37	579.444	683.556	1199.7	906.852	1013.67
108.79	1281.67	1012.37	774.518	988.889	1114	736.407	610.37	673.741	1117.63	914.63	965.333
109.343	1168.74	1053.07	729.333	1027.3	1141.82	739.185	630.815	603.741	1070.52	911	943.556
109.895	1063.7	1092.89	727.074	1028.44	1203.37	761.111	668.407	572.222	1034.15	920.259	957.333
110.447	1001.41	1097.41	732.037	1041.82	1254.41	789.333	704.148	562.407	1076.93	946.185	1020.7
110.999	1010.41	1087.41	766.63	1024.33	1259.26	836.518	718.926	583.889	1157.22	995.556	1061.56
111.552	1087.74	1058.48	802.667	960.667	1234.96	868.259	766.667	606.148	1088.04	1057.59	990.963
112.104	1231.7	1050.33	736.222	934.704	1256.63	896.296	834.482	669.074	1004.48	1119.11	899.111
112.656	1423.48	1004.93	668.778	924.741	1232.41	858.185	915.37	779.111	957.593	1170.63	849.667
113.208	1594.67	955.852	679.074	910.074	1225.59	836.704	995	796.704	928.556	1220.44	805.704
113.761	1600.7	894.482	761.185	929.482	1192.33	797	986.259	755	920.741	1257.41	754.407
114.313	1400.44	860.222	882.556	972.852	1112.48	767.852	959.37	739.111	982.926	1258.07	725.889
114.865	1170.89	827.037	941.259	937.407	1053.37	698.63	947.556	788.518	1091.04	1227	699.741
115.417	999.815	787.704	969.518	857.482	1024.82	696.63	1013.56	823.148	1227.85	1185.74	688.148
115.97	856.815	763.852	972.963	783	1036	710.704	1129.07	859.37	1320.67	1138.67	681.444
116.522	753.333	773.593	936.259	729.518	1014	759.185	1274.41	856.926	1378.37	1078.96	706.111
117.074	696.852	842.444	842.333	746.482	1006.3	757.259	1363.85	844.074	1437.74	1021.44	767.667
117.626	671.815	917.963	774.63	764.704	982.407	747.444	1230.37	807.593	1429.67	1022.37	799.704
118.178	660.111	1060.33	763.259	775.889	955	741	1155.48	791.222	1240.3	1067.78	834.185
118.731	642.037	1180.82	799.482	799.37	965.815	717.926	1174.07	778.593	1052.44	1151.15	877.741
119.283	644.889	1192.04	875.482	785.667	976.889	690.593	1212.85	772.926	980.074	1214.22	898.259
119.835	666	1213.89	998.741	731.222	993	713.889	1117.96	792.037	944.222	1236.48	930.222
120.387	674.074	1305.48	1115.41	685.37	1032.89	775.37	1044.59	892.556	943.667	1231.63	980.259
120.94	668.37	1302.15	1182.22	672.593	1096.18	774	1012.26	1066.11	1007.04	1251.63	1032.52
121.492	673.222	1237.48	1228.85	685.185	1086.96	726.667	993.37	1219.11	1036.67	1293.18	1086.37
122.044	715.63	1146.78	1117.52	703.037	1068.41	651.778	1015.56	1247.93	1024.44	1375.11	1130.56
122.596	787.518	1123.78	1066.93	731.778	1026.11	606.222	998.926	1194.96	1076.11	1472.11	1149.89
123.149	888.889	1108.15	986.667	742.815	985.259	588.259	951.518	1146.44	1139.59	1510.11	1162.41
123.701	959.704	1085.59	960.556	740.037	962.926	585.963	896.704	1156.26	1224.48	1483.96	1119.52
124.253	971.444	1094.89	946.963	795.148	932.259	604.518	951.704	1193.41	1341.85	1424.74	1028.44
124.805	957.518	1144.74	1004.37	877.296	894.926	599.741	1093.67	1198.85	1443.15	1347.93	927.37
125.358	946.778	1228.15	1028.82	817.963	860.333	626.741	1244.56	1229.3	1464.78	1292.26	854.852
125.91	957.63	1298.22	1017.41	778.37	831.593	687.926	1316.37	1259.59	1432.85	1292.56	816.593
126.462	1003.7	1292.82	955.667	800.407	815.37	792.518	1380.07	1175.18	1415.18	1282.93	801.815
127.014	1065.93	1178.18	896.815	817.444	828.778	836.815	1434.82	1002.37	1342.37	1256.67	810.741
127.566	1091.26	1091.74	851.518	801.037	806.556	805.63	1392.26	833.667	1285.41	1228.37	860.259
128.119	1064.18	1071.07	787.259	789.704	762.963	749	1232.44	722.482	1214.48	1214.59	924.704
128.671	1014.78	1040.78	783.63	815.778	738.63	745.444	1009.37	743.778	1187.04	1201.89	958.037
129.223	1013.07	1003.63	828.518	818.482	725.148	717.111	894.333	858.148	1260.93	1173.11	1049.33
129.775	1088.52	1006.18	864.37	824.815	723.482	707.407	828.518	969.333	1339.63	1158.59	1239.7
130.328	1171.15	1046.52	928	847.482	769.926	704.889	836.148	993.407	1255.56	1158.07	1401.04
130.88	1189.67	1062.82	943.185	794.185	803.482	694.778	887.667	867.111	1020.11	1202.18	1438.67
131.432	1134.56	1092.41	952.185	664.63	804.444	692.185	846.333	705.37	878.778	1292.11	1377.7
131.984	1072.22	1090.52	965.333	673.037	789.111	674.778	736.37	575.518	782.037	1401.52	1286.63
132.537	1033.11	1030.22	951.37	706.926	786.074	693.111	619.074	524.111	727.63	1480.07	1201.11
133.089	999.407	924.407	965.037	794.778	789.815	761.407	609.37	518.074	658.259	1498.56	1142.67
133.641	936.926	793.482	851.482	839	802.926	864.185	620.444	504.222	608.518	1444.52	1083.63
134.193	877.259	702.556	784.778	791.074	811.333	904.185	627.556	497.333	608.444	1411.82	1041.7
134.746	870.963	683.593	766.482	840.444	834.815	859.63	644.222	524.556	611.259	1457.85	1013.59
135.298	900.593	697.148	730.926	891.741	815.482	793.37	733.889	580.259	640.407	1499	944.926
135.85	936.333	710.667	712.518	877.037	792.259	729.111	851.778	645.518	671	1560.41	869.407
136.402	949.815	729.037	808.926	875.556	807.741	691.333	881.741	684.593	672.963	1623.82	814.852
136.954	929.556	760.482	927.482	900.518	836.667	677.852	876.333	686.889	676.518	1655.82	782.593
137.507	903.037	816.074	1020.67	917.963	848.963	689.333	938.593	702.296	691.222	1603.82	756.63
138.059	877.704	838.704	1091.67	948.148	855.407	722.148	1024.07	722.852	682.407	1492.56	737.111
138.611	864.074	825.889	997.074	931.111	897.815	763	1078.44	756.482	702	1400.7	746.704
139.163	854.259	778.963	881.222	916.852	915.222	791.63	1045.26	759.407	766.259	1353.59	787.815
139.716	833	709.407	809.741	874.963	959.037	823.963	964.444	744.407	794.667	1323.07	828.111
140.268	839.222	652.778	812.556	866.815	1001.04	808.852	939.407	722.222	773.407	1301.89	826.741
140.82	871.926	608.444	845.852	867.185	1022.93	763.482	1004.56	677.704	740.444	1286.48	824.889
141.372	910.407	613.778	823.148	834.482	1033.11	691.518	1059.96	661.556	761.593	1313.48	822.667
141.925	938.852	628.889	792.37	819.074	1064.85	627.593	1101.3	662.741	821.593	1355.11	784.963
142.477	929.667	615.741	747.185	818.889	1117.82	608.259	1125.15	667.556	941.111	1363.96	794.63
143.029	907.037	595.778	761	798.518	1164.44	586.963	1084.89	695.926	986.926	1357.11	841.333
143.581	903.482	576.667	791.407	777.037	1187.3	623.185	1007.33	718.444	879	1331.04	856.704
144.134	942.148	557.704	780.074	745.518	1140.52	624.482	926.333	715.926	792.63	1299.22	868.37
144.686	990.444	542.037	745.518	705.815	1127.82	629.667	878.074	703.704	811.667	1265.48	907.963
145.238	1034.3	562.778	724.889	704.185	1140	622.185	832.296	672.407	819.259	1212.96	922.185
145.79	1042.63	618.482	706.889	738.259	1141.41	620.556	801.074	635.185	740.482	1136.56	961.296
146.342	984.889	662.667	663.482	749.37	1111	644.926	797.259	605.556	644.63	1051.56	1026
146.895	939.482	730.63	679.482	725.593	1040.67	660.815	804.556	570.444	617.37	983.296	1122.7
147.447	916.37	861	694.259	716.741	1016.7	634.778	833.63	564.111	617	931.667	1268.44
147.999	907.704	1058.56	713.333	710.815	983.963	577.518	847.037	569.593	659.593	891.333	1383.11
148.551	905.63	1203.48	714	711.222	956.259	515.926	842.889	585.37	697.074	883.185	1421.3
149.104	900.926	1074.85	726.037	773.926	922.741	485.259	896.222	606.518	737.778	879.444	1386.41
149.656	879.926	885.222	703.741	818.037	917.259	469.741	938.518	614.741	785.111	904.889	1244.22
150.208	869.815	705.518	653.185	836.482	913.333	494.63	974.815	628.63	801.593	954.963	1108.96
150.76	881.482	589.963	608.963	882.815	926.889	530.333	965.889	668.63	799.333	1023.63	991.593
151.313	896.889	540.741	629.296	925.815	916.741	546.482	943.741	679.926	848.667	1088.11	932.889
151.865	914.074	546.593	689.444	981.444	890.407	540	958.444	599.296	926.482	1113.74	903.815
152.417	936.593	582.667	718.926	998.741	878.037	548.593	987.889	534.185	1087.59	1093.18	918.926
152.969	982.963	606.333	775.407	986.148	858.111	574.333	1033.3	504.519	1182.04	1063.41	949.518
153.522	1015.74	588.593	794.667	908.37	878.889	570.296	1043.82	485.815	1151	1049.33	996.667
154.074	1010.59	563.518	756.296	838.889	943.556	564.407	1126.7	499.259	1002	1061.41	1031.52
154.626	951.185	596.556	775.111	747.593	966.963	523.63	1143.67	518.407	846.704	1067.67	1036
155.178	871.185	639.704	807.482	742.037	1006.11	501.963	1053.78	564.333	851.444	1084.11	1032.85
155.73	816.741	682.926	844.482	747.407	1036.82	441.481	986.037	611.593	924.074	1160.63	1024
156.283	765.148	772.815	895.111	727.556	1098.74	424.63	910.963	662.482	906.963	1269.67	1061.18
156.835	718.704	798.518	956.482	738.926	1116.82	434.889	901.963	706.63	899.259	1343.74	1085.22
157.387	681.963	863.37	946.63	800.889	1070	463.111	904.593	733.259	869.926	1344.67	1052.59
157.939	645.222	929.926	923.111	870	965.185	474.111	903.667	764.259	767.111	1314.15	1004.85
158.492	606.741	980.185	885.556	917.407	868.889	470.111	907.37	787.556	688.556	1281.82	968.37
159.044	585.741	846.148	806.741	922.259	825.37	436.148	948.815	796.667	679.444	1244.59	954.185
159.596	591.37	667.222	757.852	843.148	802.074	427.222	949.889	762.296	662.259	1187.93	928.667
160.148	600.148	580.37	799.852	817.407	752.185	439.889	933.148	771.963	635.074	1119.59	921.741
160.701	607.333	515.815	896.926	828.148	733.296	481.333	936.852	788.815	605.704	1079.48	969.815
161.253	638.074	489.63	957.222	842.778	694.556	517.963	891.63	800.407	589.407	1053.52	1020.78
161.805	694.296	501.519	955.889	874.296	696.926	495.37	841.778	784.704	599.963	1049.41	1028.22
162.357	745.185	529.37	869.815	878.333	706.111	458.519	796.074	788.741	628.556	1054.85	1015.7
162.91	779.444	560.704	755.111	894.852	700.889	458.963	760.37	810.296	635.148	1087.41	992.037
163.462	825.963	571.074	670.074	870.889	703.296	448	762.926	835.741	671.444	1190.22	966.407
164.014	891.333	581.889	635.333	843.963	709.889	465.481	796.148	856.815	697.148	1323.67	918.222
164.566	953.296	605.815	607.222	816.556	705.593	460.259	810.185	858.407	680.63	1411.63	864.852
165.118	972.556	599.778	573.667	807.296	679.741	454.519	781.222	816.482	653.37	1458.41	846.37
165.671	907.444	566.556	567.556	808.333	666.37	440.185	721.741	729.185	646.778	1477.67	900.63
166.223	806.926	527.407	580.815	799.37	647.704	445.926	715.185	662.482	626.741	1398.44	1004.56
166.775	722	503	588.185	792.963	637.889	430.444	702.518	645.333	660.111	1294.33	1026.93
167.327	685.296	506.963	605	786.593	595.074	435	730.926	633.185	648.963	1252.26	1013
167.88	669.333	535.333	615.778	774.222	589.111	398.778	750.259	629.444	649.63	1209.85	1029.04
168.432	675.111	586.778	647.407	748.185	612.37	394.852	758.222	618.185	649.778	1159.07	1044.3
168.984	697.37	651.778	689.556	723.815	607.741	389.852	746.185	610.37	655.444	1110.33	1093.85
169.536	758.778	692.074	723.111	706.667	643.333	380.296	752.518	636.37	654.296	1077	1144.59
170.089	839.037	695.482	744.889	702.074	633.296	374.778	742.963	662.333	695.444	1067.85	1128.89
170.641	894.185	691.815	751.63	695.185	675.518	394.111	685.482	700.704	685.111	1072.52	1106.3
171.193	906.222	703.037	805.037	716.037	703.778	396.704	647.482	756.593	631.518	1078	1139.63
171.745	882.741	739.407	801.333	719.296	740.963	394.259	635	782.222	603.222	1082.56	1195.37
172.298	849.148	767.741	842.963	736.407	752.333	408.556	623.667	776.444	601.963	1126.89	1250.33
172.85	825.111	778.926	807.148	774.482	763.852	389.296	618.704	781.556	577.889	1190.89	1336.48
173.402	814.667	790.037	729.963	819.778	747.518	390.148	633.852	796.222	534.889	1250.52	1457
173.954	783.111	804.407	685.407	834.444	707.185	385.667	643.852	826.037	526.667	1312.11	1543.7
174.507	738.333	834.148	669.815	841.518	678.296	389.778	649.815	849.556	531.63	1336.85	1594.22
175.059	708.037	829.778	670.963	843.037	630.444	391.148	647.556	875	507.259	1228.56	1600.37
175.611	683.185	786.407	688.963	846.444	595.296	432.148	682.185	915.889	521.482	1075.18	1565.07
176.163	671.037	710.185	715	864.222	572.667	498.259	694.185	974.444	526.037	968.667	1514.04
176.715	685.926	662.222	699.741	865.704	562.852	554.852	683.259	990.259	527.556	917.111	1514.63
177.268	720.296	627.185	671.852	886.926	557.037	583.444	676.482	1007.41	567.741	890.518	1533.96
177.82	770.593	605.593	665.593	894.963	563.148	589.259	720.667	1040.52	579.37	903	1501.44
178.372	832.667	589.148	692.556	865.926	586.111	540.037	793.037	1068	542.259	944.148	1446.48
178.924	877.556	601.704	694.778	829.444	614.889	472.074	875.148	1036.52	536.444	994.704	1425.07
179.477	900.296	617.259	705.148	778.222	642.667	429.778	857.185	968.407	528.185	1044.56	1397.59
180.029	888.926	643.518	716.63	747.815	655.593	434.519	757.815	934.667	556.518	1072.52	1383.74
180.581	857.444	694.889	680.296	751.741	685.704	446.963	674.185	887.296	567.185	1084.11	1376.85
181.133	815.778	713.259	667.296	756.518	759.482	432.37	621.185	819.259	544.518	1111.33	1361.48
181.686	770.593	690.407	669.518	744.518	810.296	414.667	611.556	795.482	543.963	1129.59	1322.37
182.238	734.518	672.37	681.148	725.333	838.185	390.111	625.852	789.259	571.482	1114.56	1270
182.79	714.926	646.222	696.518	691.667	828.074	406.185	661.185	767.593	613.296	1081.41	1228.41
183.342	710.37	602.852	657.222	692	805.111	406.074	737.926	761.889	621.926	1058.07	1171.78
183.895	713	572.296	629.593	669.37	784.556	421.556	774.185	762.667	577.667	1026.3	1144.41
184.447	701.593	574.926	615.556	666	779.482	414.815	827.815	767.482	560.37	966.667	1104.04
184.999	680.185	613.926	656.815	665.593	762	416.074	841.37	733.444	562.667	950.852	1074.56
185.551	674.63	662.63	682.111	643.482	755.482	404.815	795.778	733.556	586.667	964.778	1092.3
186.103	700.889	671.111	707.667	620.037	736.778	400	739.778	745.556	617.852	941.148	1122.15
186.656	746.518	648.852	716.778	630.741	700.037	415.741	730.111	779.037	684.37	899.556	1166.85
187.208	794.482	640.556	705.407	631.111	673.926	408.37	740.111	812.333	696.037	872.037	1163.82
187.76	816.852	639.926	683.111	624.333	644.074	402.259	788.593	809.148	689.482	879.37	1153.52
188.312	810.556	649.963	658.63	632.889	631.704	414.852	853.482	801.556	655.518	923.111	1149.07
188.865	772.185	661.148	623.185	623.667	620.593	397.778	915.37	813.889	615.185	939.852	1151.22
189.417	723.37	669.111	591.259	620.444	609.889	389.259	922.593	840.741	573.926	912.482	1201.89
189.969	676.296	665.407	559.926	627.926	584.222	367.185	908.852	850.852	559	880.741	1314.18
190.521	652.444	656.444	556.111	649.926	569.37	363	886.667	869.815	561.704	870.556	1386.44
191.074	635.63	632.667	545.593	678.963	591.37	361.37	851.222	902.259	569.704	882.37	1427.74
191.626	636.778	592.333	563	698.815	600.333	345.519	835.111	930.482	601.111	881.963	1416.82
192.178	656.593	578.556	566.259	707.778	606.556	339.037	802.333	960.518	636.148	869.296	1366.44
192.73	678.889	585.037	555.815	727.444	600.963	330.704	771.333	999	683.704	829.518	1291
193.283	698.296	596.593	537.667	723.556	595.482	329.889	782.63	1035.07	707.518	778.704	1187.93
193.835	719.556	632.593	550.667	758.444	583.593	342.037	703.556	1054.18	713.593	748.741	1095
194.387	743.37	665.556	553.333	752.852	575.741	361.667	578.037	1077.63	757.259	733.63	1003.52
194.939	787.518	687.667	563.778	757.222	567	381.63	532.444	1094.59	771.889	743.667	973.963
195.491	834.518	701	562	731.333	527.444	395.778	548.518	1104.41	786.852	776.667	967.926
196.044	889.63	722.482	584.185	717.667	506	397.074	555.815	1116.89	769.556	816.037	954.815
196.596	913.037	740.074	583.222	698.593	502.222	415.444	540.815	1150.04	747.556	816.704	939.482
197.148	908.037	742.815	601.518	674.037	499.519	416.481	516.741	1173.48	753.482	810.444	935.704
197.7	867.926	737.852	625.444	675.778	490.481	430.556	465.704	1154.63	788	831.444	940.333
198.253	806.482	717.407	646.148	695.222	495.407	449.593	425.556	1154.93	778.926	862.667	956.037
198.805	759.037	719	655.333	676.667	495.556	465.296	426.667	1155.85	800.926	862.482	975.185
199.357	750.518	738.482	666.296	649.889	500.704	454.815	441.296	1156.18	819.815	812.518	984.333
199.909	759	759.074	686.111	615.852	505.593	459.926	463.111	1139.59	818.296	748.222	1001.07
