# Supplementary material for: DCC regulates astroglial development essential for telencephalic morphogenesis and corpus callosum formation
Source: eLife. 2021 Apr 19;10:e61769. doi: 10.7554/eLife.61769 (PMC8116049; doi:10.7554/eLife.61769)
Supplement: Figure 3—source data 1. [file elife-61769-fig3-data1.xlsx]

## Sheet: Figure 3G
Figure 3G: GLAST fluorescence intensity in E14 Dcckanga mice
Distance (microns)	Dcckanga/kanga n1	Dcckanga/kanga n2	Dcckanga/kanga n3	Dcckanga/kanga n4	Dcckanga/kanga n5	Dcckanga/kanga n6	Wildtype n1	Wildtype n2	Wildtype n3	Wildtype n4	Wildtype n5	Wildtype n6
0	1982.61	2866.81	2298.84	2157.63	2405.09	3977.98	3145.81	1822.41	1682.59	2123.48	1840.99	1994.39
0.553	2039.31	3035.3	2395.88	2171.29	2528.25	3880.16	3130.69	1941.45	1856.64	2235.67	1967.95	2095.14
1.105	2108.79	3109.81	2403.44	2200.21	2663.88	3777.41	2913.72	2026.06	2083.6	2338.9	2085.78	2191.79
1.658	2186.06	3090.06	2315.98	2223.33	2875.58	3771.44	2644.21	2096.99	2293.82	2407.35	2245.83	2262.64
2.21	2240.53	3003.49	2263.62	2258.97	3158.64	3844.06	2470.09	2192.02	2454.42	2357.52	2347.76	2304
2.763	2305.74	2889.39	2219.3	2329.17	3447.94	3966.21	2396.92	2297.84	2553.87	2298.69	2401.89	2334.79
3.316	2371.48	2796.47	2140.91	2408.76	3697.5	4123.16	2380.8	2391.9	2556.41	2267.42	2402.67	2360.02
3.868	2407.78	2737.88	2102.3	2480.06	3947.37	4190.05	2379.66	2471.86	2491.16	2245.94	2374.77	2382.22
4.421	2428.83	2715.63	2118.9	2495.75	4084.16	4151.16	2381.27	2498.36	2423.72	2260.11	2354.28	2411.11
4.973	2498.2	2698.12	2121.94	2511.86	4010.06	4098.92	2429.79	2423.09	2374.81	2233.56	2356.42	2460.34
5.526	2530.33	2694.78	2118.48	2534.1	3755.94	4015.72	2475.75	2319.55	2327.01	2257.13	2367.47	2506.99
6.078	2474.04	2648.08	2092.35	2467.7	3545.54	3966.68	2525.76	2222.41	2278.21	2250.4	2377	2514.58
6.631	2460.23	2594.25	2066.9	2376.87	3485.85	3925.35	2550.16	2166.04	2239.79	2240.9	2342.36	2471.96
7.184	2484.8	2586.22	2060.94	2311.78	3493.13	3915.13	2522.21	2161.04	2208.52	2250.66	2307.63	2410.3
7.736	2458.79	2595.92	2076.84	2337.36	3548.97	3937.55	2512.89	2167.05	2172.44	2255.05	2270.67	2377.62
8.289	2421.39	2594.02	2118.34	2394.48	3564.34	3940.49	2555.11	2164.56	2126.58	2280.96	2223.03	2376.79
8.841	2418.41	2595.97	2165.46	2393.72	3529.84	3936.36	2603.81	2183.18	2076.19	2292.77	2158.56	2389.25
9.394	2416.43	2615.32	2173.88	2387.93	3548.87	3934.34	2629.6	2221.21	2033.77	2286.27	2121.56	2402.45
9.947	2372.93	2629.42	2179.69	2392.44	3619.5	3915.3	2628.93	2268.29	2022.92	2301.56	2104.54	2387.52
10.499	2320.19	2596.65	2190.32	2396.59	3677.24	3916.66	2614.88	2297.03	2052.23	2307.05	2113.9	2350.13
11.052	2266.18	2556.11	2170.62	2399.04	3646.83	3935.97	2586.45	2304.11	2102.58	2344.21	2123.01	2330.13
11.604	2202.67	2553.62	2136.29	2352.45	3496.19	3973.52	2543.36	2271.23	2151.69	2341.49	2107.6	2320.57
12.157	2154.7	2574.97	2102.53	2292.96	3349.39	4011.36	2505.23	2216.44	2186.7	2310.83	2115.32	2328.91
12.709	2109.26	2600.31	2092.92	2244.99	3214.77	4009.09	2456.42	2152.87	2192.94	2276.81	2120.87	2328.22
13.262	2078.15	2617.11	2089.61	2174.74	3116.46	3999.05	2418.19	2123.64	2178.26	2249.89	2097.44	2339.86
13.815	2072.59	2614.22	2050.63	2156.93	3034.64	3991.97	2388.59	2150.39	2172.15	2220.97	2029.78	2375.34
14.367	2069.98	2578.51	2030.23	2186.69	3015.25	3989.84	2373.17	2196.1	2183.52	2200.13	1999.84	2411.41
14.92	2056.09	2511.51	2055.7	2222.36	3063.16	3998.02	2371.59	2187.3	2193.49	2170.06	1973.18	2421.58
15.472	2044.27	2438.15	2088.77	2211.11	3131	4031.54	2332.03	2102.21	2186.99	2180.52	1948.86	2422.1
16.025	2035.33	2364.85	2091.64	2193.74	3224.61	4078.39	2271.75	1998.5	2172.24	2177.11	1925.26	2439.63
16.578	2013.89	2292.75	2064.18	2183.36	3342.63	4114.94	2227.19	1917.17	2161.75	2160.55	1899.94	2445.68
17.13	1980.63	2248.46	2041.08	2167.89	3359.97	4099.2	2228.52	1859.96	2152.74	2120.99	1880.8	2436.45
17.683	1965.24	2217.1	2025.01	2168.5	3341.66	4066.07	2249.55	1851.09	2125.73	2035.92	1843.61	2457.54
18.235	1952.61	2186.97	2047.8	2130.79	3442.81	4061.61	2274.87	1841.69	2081.86	1951.34	1805.75	2485.56
18.788	1961.68	2158.59	2079.31	2090.81	3582.94	4095.56	2285.81	1857.6	2038.01	1927.7	1784.39	2480.48
19.341	1983.77	2144.63	2059.59	2068.45	3611.1	4104.83	2256.49	1904.77	2004.09	1934.47	1806.28	2443.42
19.893	2004.65	2141.27	2004.65	2078.56	3469.05	4070.01	2211.91	1942.31	1980.4	1924.62	1840.06	2394.24
20.446	1989.66	2142.83	1942.96	2082.16	3267.68	4056.63	2171.5	1949.24	1955.3	1931.57	1880.14	2346.51
20.998	1974.66	2163.83	1889.14	2088.82	3172.92	4041.8	2125.94	1928.03	1938.3	1932.14	1922.38	2290.53
21.551	1980.48	2182.48	1872.27	2091.87	3141.65	3974.1	2086.17	1887.03	1934.93	1969.28	1931.9	2253.91
22.103	1990.15	2181.89	1876.05	2098.22	3207.85	3879.43	2077.86	1829.65	1925.34	2093.88	1936.39	2231.02
22.656	1979.76	2167.97	1882.13	2083.14	3269.23	3823.09	2084.71	1795.63	1901.6	2327.57	1924.63	2213
23.209	1942.79	2149.17	1892.85	2063.97	3220.61	3821.94	2088.18	1769.22	1881.47	2408.48	1904.36	2181.97
23.761	1916.31	2100.5	1919.44	2052	3119.36	3859.04	2093.42	1761.69	1875.48	2246.48	1896.66	2140.42
24.314	1923.25	2039.03	1949.69	2009.36	3033.49	3891.84	2098.87	1756.25	1873.89	2072.71	1896.47	2109.54
24.866	1951.64	1994.73	1981.47	1963.13	2983.67	3875.93	2083.52	1768.66	1864.39	1966.43	1854.99	2097.08
25.419	1982.64	1971.4	2002.45	1918.78	3003.46	3792.91	2083.68	1774.63	1845.52	1932.91	1832.28	2071.34
25.972	1985.43	1962.94	2026.48	1897.71	3009.02	3659.83	2069.57	1779.86	1826.04	1940.26	1801.07	2037.66
26.524	1973.85	1950.23	2028.85	1888.18	3022.1	3562.55	2047.3	1787.47	1812.65	1953.82	1775.65	2033.4
27.077	1957.21	1936.05	2000	1870.54	2974.85	3491.69	2033.9	1792.29	1811.89	1977.9	1790.39	2040.16
27.629	1923.81	1922.28	1981.87	1895.16	2861.1	3371.68	2032.49	1805.78	1818.11	1984.71	1813.58	2051.02
28.182	1891.88	1904.29	1957.44	1915.3	2732.86	3221.62	2045.39	1822.63	1830.51	1970.27	1813	2072.51
28.735	1870.57	1895.51	1926.31	1931.51	2696.6	3179.22	2040.79	1820.48	1839.53	1957.96	1803.07	2068.18
29.287	1869.66	1900.54	1923.11	1923.51	2718.5	3224.45	2037.22	1791.18	1835.79	1944.29	1790.22	2030.3
29.84	1869.71	1894.11	1960.09	1936.5	2725.03	3280.92	2013.93	1765.21	1828.75	1946.42	1794.04	2001.48
30.392	1843.37	1868.62	2004.39	1969.68	2709.31	3266.55	1998.92	1763.97	1827.85	1947.97	1789.7	1986.43
30.945	1793.03	1834.12	2030.54	1972.73	2676.14	3206.42	1999.88	1773.01	1830.3	1920.94	1800.37	1957.68
31.497	1751.62	1802.35	2047.15	1937.09	2691.34	3120.06	1971.24	1784.15	1829.87	1909.37	1778.55	1911.39
32.05	1742.64	1773.81	2050.83	1906.68	2737.77	3090.1	1931.43	1771.41	1825.99	1906.71	1754.79	1884.04
32.603	1741.59	1759.79	2062.98	1913.77	2775.1	3120.28	1916.07	1734.81	1822.7	1877.69	1750.89	1869.92
33.155	1742.42	1765.81	2084.38	1912.83	2756.8	3092.37	1903.55	1723.15	1809.7	1848.98	1763.61	1873.95
33.708	1722.44	1785.55	2086.81	1912.71	2719.92	3011.4	1883.98	1730.95	1781.88	1833.65	1760.05	1866.66
34.26	1689.34	1807.53	2090.46	1918.57	2721.5	2973.45	1868.2	1737.4	1754.76	1821.97	1757.63	1859.4
34.813	1685.79	1803.55	2098.65	1912.16	2768.51	2971.04	1868.04	1733.9	1741.11	1811.34	1741.84	1849.71
35.366	1689.22	1794.33	2095.46	1926.5	2791.94	2975.02	1856.82	1730.18	1732.25	1817.18	1743.28	1833.3
35.918	1673.17	1786.24	2078.97	1925.36	2744.55	2950.27	1841.36	1716.13	1718.21	1816.96	1745.96	1816.42
36.471	1640.25	1781.95	2053.79	1920.63	2691.31	2898.95	1831.05	1700.8	1702.51	1802.45	1737.26	1815.65
37.023	1611.83	1795.88	2025.32	1898.14	2618.49	2841.24	1834.08	1703.19	1689.1	1782.93	1708.91	1829.91
37.576	1595.06	1817.65	2010.67	1897.97	2556.79	2782.62	1838.2	1726.7	1675.57	1765.16	1678.5	1863.14
38.128	1608.72	1844.35	2003.97	1901.9	2537.08	2775.3	1832	1759.25	1672.98	1745.75	1689.66	1885.46
38.681	1630.16	1850.9	1992.25	1885.78	2533.57	2796.69	1845.39	1798.93	1685.4	1715.57	1731.25	1895.58
39.234	1634.23	1829.94	1976.26	1874.23	2539.7	2830.3	1844.81	1842.6	1710.02	1687.39	1867.69	1894.25
39.786	1630.76	1803.08	1956.63	1882.72	2536.83	2856.13	1831.48	1843.35	1737.89	1669.52	1981.59	1896.54
40.339	1634.39	1782.96	1921.36	1843.92	2549.82	2851.24	1811.74	1799.44	1756.68	1674.41	1949.16	1905.52
40.891	1647.74	1775.82	1903.43	1834.69	2605.33	2792.98	1812.43	1757.95	1760.16	1699.54	1872.35	1906.57
41.444	1650.14	1765.69	1893.59	1842.49	2656.87	2719.82	1820	1733.17	1743.35	1723.67	1752.93	1904.4
41.997	1639.12	1760.2	1902.38	1853.32	2679.86	2669.13	1835.97	1707.58	1717.89	1749.46	1654.06	1924.51
42.549	1632.33	1763.31	1941.93	1862.87	2669.9	2649.1	1851.17	1688.6	1694.08	1755.82	1629.74	1954.58
43.102	1637.23	1752.15	1959.97	1870.19	2668.65	2657.34	1888.48	1694.22	1679.31	1767.13	1624.46	1964.59
43.654	1628.29	1740.21	1935.64	1887.93	2696.95	2695.24	1900.98	1703.41	1679.2	1767.28	1617.33	1953.44
44.207	1617.39	1734.42	1916.54	1890.82	2725.71	2787.79	1897.8	1719.21	1687.48	1772.19	1618.45	1939.34
44.76	1609.43	1732.19	1911.73	1886.07	2703.52	2838.43	1893.82	1721.93	1695.95	1796.28	1560.07	1935.71
45.312	1595.89	1725.25	1900.85	1877.41	2651.72	2798.19	1925.22	1710.23	1695.8	1817.82	1527.64	1921.18
45.865	1594.42	1713.78	1896.48	1880.97	2601.43	2748.98	1965.44	1719.66	1686.37	1832.46	1514.69	1906.94
46.417	1595.91	1709.8	1885.59	1884.39	2529.48	2701.7	1985.44	1740.45	1680.63	1841.06	1514.53	1898.39
46.97	1581.48	1717.57	1856.18	1886.52	2495.35	2638.63	1982.5	1737.87	1681.63	1808.09	1509.56	1892.79
47.522	1559.47	1725.42	1858.02	1890.47	2485.34	2604.85	1950.97	1701.31	1690.28	1770.06	1504.5	1907.88
48.075	1560.36	1739.97	1869.29	1885.28	2456.31	2594.42	1915.84	1678.52	1704.65	1760.35	1517.76	1941.46
48.628	1564.47	1745.43	1874.81	1870.55	2471.2	2604.17	1884.88	1666.41	1709.18	1769.19	1504.41	1960.81
49.18	1571.94	1746.16	1889.2	1860.06	2499.83	2649.71	1861.68	1645.6	1698.04	1780.64	1498.01	1974.28
49.733	1587.8	1741.37	1907.53	1836.57	2533.13	2693.02	1874.39	1635.46	1682.4	1774	1520.02	1969.24
50.285	1592.92	1737.95	1904.93	1815.26	2517.67	2696.28	1866.24	1635.69	1668.39	1735.78	1551.47	1948.53
50.838	1583.3	1738.08	1874.93	1817.69	2489.43	2699.41	1836.86	1634.12	1661.29	1715.94	1554.48	1934.65
51.391	1594.04	1732.3	1839.94	1830.19	2423.62	2686.55	1821.58	1628.43	1664.55	1712.89	1545.51	1929.75
51.943	1595.56	1713	1838.21	1829.23	2358.98	2662.06	1802.97	1619.83	1672.46	1734.23	1548.16	1920.64
52.496	1591	1688.88	1837.09	1832.91	2322.98	2693.23	1786.68	1614.61	1679.05	1775	1568.59	1898.17
53.048	1583.76	1671.04	1825.02	1855.19	2333.74	2721.15	1798.82	1602.22	1681.58	1831.34	1580.41	1877.69
53.601	1596.39	1656.55	1845.64	1869.32	2342.39	2744.08	1828.86	1594.83	1676.28	1868.95	1580.63	1868.61
54.153	1628.35	1639.12	1882.82	1873.35	2337.51	2759.57	1869.47	1596.45	1667.16	1879.65	1570.68	1875.52
54.706	1646.61	1621.06	1901.68	1867.36	2361.55	2770.15	1901.37	1591.63	1659.24	1881.33	1570.25	1893.35
55.259	1664.73	1613.86	1918.84	1850.48	2410.96	2769.89	1906.78	1591.01	1653.54	1848.97	1552.18	1917.37
55.811	1687.26	1610.01	1901.12	1859.77	2413.94	2744.27	1875.81	1605.53	1648.85	1811.32	1526.26	1970.37
56.364	1712.39	1621.41	1890.11	1863.79	2359.16	2707.75	1831.43	1624.9	1646.35	1794.47	1539.37	2022.56
56.916	1747.09	1658.38	1907.12	1867.53	2289.25	2708.25	1811.13	1632.82	1647.8	1795.67	1562.7	2036.97
57.469	1774.11	1690.94	1904.69	1871.84	2266.85	2725.87	1803.19	1628.96	1649.25	1782.63	1570.34	2035.53
58.022	1788.33	1703.34	1896.93	1885.76	2288.96	2676.53	1785.52	1620.44	1649.21	1775.21	1549.84	2036.12
58.574	1799.65	1694.81	1890.99	1874.5	2335.75	2595.82	1755.88	1606.19	1649.41	1780.16	1530.39	2032.77
59.127	1792.37	1684.27	1874.24	1852.94	2368.51	2564.52	1733.7	1601.93	1655.4	1780.34	1494.07	2036.39
59.679	1758.58	1677.11	1853.34	1832.64	2383.01	2527.25	1744.74	1613.53	1667.44	1766.51	1488.18	2053.99
60.232	1724.74	1667.33	1830.12	1806.41	2381.49	2495.26	1765.57	1625.26	1677.85	1760.52	1477.87	2070.15
60.785	1694.93	1663.55	1791.96	1808.38	2396.45	2514.53	1796.51	1630.68	1679.99	1776.72	1484.27	2078.18
61.337	1664.67	1673.38	1770.74	1791.38	2388.44	2541.28	1810.51	1621.04	1674.25	1759.4	1487.26	2077.92
61.89	1668.58	1684.39	1761.54	1785.71	2371.67	2519.37	1793.92	1584.38	1671.01	1739.46	1486.23	2057.7
62.442	1681.65	1692.34	1773.55	1805.66	2378.24	2491.4	1765.32	1545.86	1679.1	1742.29	1495.74	2020.09
62.995	1689.51	1707.19	1811.27	1818.35	2374.17	2477.13	1737.4	1528.33	1690.07	1733.42	1505.97	1974.21
63.547	1679.17	1732.72	1825.12	1816.25	2347.04	2463.11	1730.68	1538.74	1682.16	1729.96	1515.12	1942.09
64.1	1679.14	1755.7	1819.48	1815.84	2318.22	2466.29	1732.27	1557.58	1650.48	1707.74	1534.58	1912.46
64.653	1690.1	1765.94	1820.03	1830.95	2297.93	2517.92	1745.08	1567.76	1615.77	1671.93	1535.14	1877.26
65.205	1700.03	1754.06	1830.86	1818.94	2273.95	2519.37	1751.88	1575.9	1594.34	1639.1	1521.41	1846.32
65.758	1711.54	1731.36	1846.88	1812.89	2271.66	2490.44	1744.92	1585.31	1590.6	1621.7	1524.94	1833.92
66.31	1727.17	1711.09	1856.89	1793.52	2300.11	2490.26	1730.33	1574.68	1596.91	1597.46	1528.03	1824.06
66.863	1736.34	1697.86	1841.06	1781.29	2355.67	2486.66	1697.53	1554.68	1606.15	1557.8	1528.52	1810.5
67.416	1736.22	1701.73	1828.51	1776.93	2411.41	2470.01	1681.94	1544.1	1618.31	1535.18	1535.71	1804.59
67.968	1742.39	1719.17	1820.66	1751.87	2446.38	2471.17	1692.42	1537.14	1625.93	1527.57	1521.78	1807.71
68.521	1746.51	1737.52	1810.1	1737.62	2453.14	2458.08	1714.01	1524.77	1618.1	1558.91	1492.59	1818.42
69.073	1727.49	1745.05	1811.97	1762.14	2406.06	2444.25	1705.09	1502.52	1599.74	1602.29	1463.56	1828.7
69.626	1714.63	1744.12	1812.43	1760.74	2345.87	2435.06	1676.72	1472.93	1580.79	1625.41	1452.05	1824.08
70.179	1694.32	1736.76	1802.36	1797.91	2333.07	2446.01	1660.6	1442.61	1563.42	1627.22	1438.54	1808.94
70.731	1662.94	1733.37	1784.68	1823.91	2342.01	2450.07	1634.81	1416.38	1547.37	1611.84	1419.7	1798.25
71.284	1625.4	1739.94	1776.25	1829.54	2366.34	2447.14	1613.24	1411.12	1534.22	1602.07	1435.33	1777.08
71.836	1592.12	1754.14	1765.42	1815.88	2391.75	2424.41	1603.71	1419.25	1522.52	1598.75	1437.96	1742.52
72.389	1574.44	1775.4	1769.91	1794.25	2430.91	2397.33	1600.43	1425.58	1513.54	1599.83	1430.68	1720.72
72.941	1576.66	1774.33	1783.67	1770.57	2460.13	2404.13	1579.89	1420.27	1511.19	1579.9	1424.63	1712.43
73.494	1606.82	1742.03	1798.42	1767.38	2473.28	2432.06	1573.3	1403.73	1518.77	1533.6	1409.49	1727.79
74.047	1624.1	1710.08	1785.72	1758.14	2495	2452.9	1567.17	1384.15	1536.74	1495.15	1399.63	1762.9
74.599	1639.42	1701.67	1766.77	1754.89	2519.71	2458.28	1553.73	1373.55	1561.94	1475.67	1381.01	1801.19
75.152	1651.27	1713.16	1755.65	1749.18	2490.14	2445.4	1551.75	1375.04	1586.41	1472.2	1374.97	1836.93
75.704	1646.54	1719.78	1741.32	1745.71	2443.42	2431.95	1573.23	1375.76	1600.22	1490.98	1373.01	1856.34
76.257	1631.69	1729.19	1740.3	1720.18	2413.18	2440.14	1592.13	1370.13	1597.68	1518.92	1371.2	1857.29
76.81	1630.31	1752.23	1736.98	1700.27	2382.61	2449.99	1593.41	1369.84	1582.97	1558.98	1361.05	1841.94
77.362	1643.65	1775.65	1719.59	1697.72	2353.33	2457.32	1577.88	1377.8	1567.79	1596.86	1349.22	1834.93
77.915	1642.45	1784.49	1713.82	1719.25	2331.26	2466.55	1548.23	1384.13	1562.81	1604.78	1354.21	1818.03
78.467	1630.4	1793.63	1728.2	1702.54	2313.52	2512.17	1529.52	1379.34	1565.82	1551.91	1351.73	1797.17
79.02	1613.03	1795.09	1738.49	1690.06	2291.67	2564.2	1522.27	1371.76	1567.1	1517.61	1349.61	1766.48
79.572	1608.67	1789.56	1726.03	1695.07	2267.04	2572.71	1511.07	1374.19	1565.17	1525.07	1338.42	1733.19
80.125	1596.94	1772.59	1716.05	1706.27	2217.57	2515.66	1511.07	1371.24	1558.25	1550.86	1340.46	1704.14
80.678	1571.48	1757.93	1725.55	1724.45	2187.5	2428.22	1507.6	1358.08	1552.53	1588.49	1344.72	1677.95
81.23	1553.1	1755.33	1749.47	1753.27	2165.86	2373.33	1480.16	1349.08	1548.69	1657.56	1355.42	1667.31
81.783	1546.61	1750.3	1766.29	1755.06	2155.08	2335.84	1458.71	1355.07	1535.98	1678.6	1360.89	1665.79
82.335	1548.95	1745.68	1779.84	1755.09	2132.56	2284.99	1448.5	1356.28	1519.61	1649.22	1359.46	1650.17
82.888	1547.93	1759.74	1782.15	1759.61	2102.68	2213.54	1432.06	1349.65	1508.76	1635.68	1350.87	1628.35
83.441	1558.01	1773.86	1783.63	1752.07	2082.87	2176.38	1410.42	1350.43	1495.85	1597.18	1349.15	1618.24
83.993	1580.75	1780.64	1776.25	1763.12	2052.06	2194.47	1399.74	1364.76	1483.3	1529.04	1352.37	1616.67
84.546	1591.75	1777.91	1780.69	1762.38	2037.96	2228.32	1396.96	1375.79	1476.52	1494.27	1346.62	1623.17
85.098	1587.2	1768.7	1791.22	1745.07	2052.99	2255.85	1399.93	1374.94	1466.57	1500.12	1352.95	1644.93
85.651	1600.48	1760.01	1792.4	1729.61	2092.84	2275.78	1409.19	1372.81	1455.43	1501.66	1330.97	1674.59
86.204	1597.67	1739.2	1772.48	1722.49	2117.3	2328.18	1437.57	1364.22	1454.44	1491.65	1321.9	1704.94
86.756	1586.98	1710.08	1746.63	1695.67	2110.7	2370.2	1479.26	1352.89	1456.06	1484.82	1319.38	1719.31
87.309	1572.12	1678.25	1733.05	1669.22	2087.76	2357.38	1496.99	1356.68	1447.19	1452.64	1328.78	1712.24
87.861	1557.31	1664.52	1721.94	1670.67	2043.75	2309.43	1497.35	1365.06	1429.59	1432.2	1344.85	1713.79
88.414	1536.61	1668.37	1698.93	1655.68	2012.78	2324.75	1494.05	1365.04	1410.63	1425.7	1336.81	1701.58
88.966	1525.36	1670.08	1667.09	1630.85	1996.45	2346.41	1491.67	1360.13	1398.94	1440.79	1327.72	1675.58
89.519	1523.58	1669.45	1658.08	1624.62	1994.71	2313.98	1497.13	1359.34	1403.92	1481.67	1323.43	1652.08
90.072	1525.5	1682.01	1656.13	1625.25	2002.21	2234.83	1489.34	1367.72	1424.33	1503.39	1324.32	1642.94
90.624	1543.99	1700.82	1654.95	1621.13	1988.53	2179.01	1493.67	1373.41	1443.32	1481.45	1322.12	1650.84
91.177	1579.98	1697.57	1652.09	1612.85	1962.68	2152.43	1492.19	1371.56	1452.3	1444.24	1310.66	1666.04
91.729	1613.61	1685.37	1663.52	1628.58	1954.14	2148.38	1482.36	1369.71	1456.87	1406.41	1306.92	1680.18
92.282	1639.8	1677.19	1680.65	1653.02	1965.36	2161.95	1477.76	1368.11	1447.09	1389.02	1328.19	1692.39
92.835	1660.87	1679.03	1698.06	1650.08	1988.62	2150.39	1485.27	1359.42	1412.53	1407.44	1355.82	1707.35
93.387	1664	1676.67	1720.02	1671.36	2022.83	2144.14	1480.36	1340.84	1371.02	1433.43	1371.13	1726.1
93.94	1658.59	1655.07	1726.39	1665.16	2041.78	2181.95	1466.9	1335.21	1337.86	1433.14	1342.14	1745.87
94.492	1646.53	1633.48	1737.09	1619.16	2056.94	2189.01	1450.88	1346.83	1317.92	1415.13	1314.5	1752.87
95.045	1619.29	1610.35	1750.37	1571.04	2096.13	2177.58	1448.62	1368.77	1314.17	1397.89	1302.4	1750.6
95.597	1589.88	1591.2	1759.17	1551.33	2099.03	2172.97	1456.36	1390.02	1319.39	1402.19	1294.14	1743.87
96.15	1575.75	1583.87	1761.18	1546.03	2095.88	2180.81	1459.74	1404.49	1319.98	1425.31	1297.04	1721.21
96.703	1563.03	1581.39	1787.69	1553.02	2089.72	2189.19	1444.87	1404.59	1307.42	1446.88	1327.79	1690.33
97.255	1550.25	1579.15	1781.4	1554.03	2120.75	2209.4	1432.5	1387.13	1293.65	1442.72	1359.48	1659.03
97.808	1545.69	1576.38	1743.6	1537.62	2179.75	2229.64	1438.84	1366.52	1287.79	1407.25	1350.36	1628.57
98.36	1557.46	1574.22	1716.3	1539.98	2193.89	2246.9	1432.76	1346.12	1281.27	1381.08	1323.13	1612.03
98.913	1568.28	1570.69	1685.95	1555.44	2180.89	2239.99	1419.26	1324.55	1271.98	1363.38	1286.85	1607.51
99.466	1574.91	1571	1656.6	1585.94	2148.6	2182.99	1384.08	1306.7	1264.5	1344.34	1262.11	1618.31
100.018	1559.11	1576.91	1652.48	1606.86	2114.65	2138.36	1366.47	1296.62	1261.32	1311.61	1258.16	1637.24
100.571	1532.64	1592.51	1655.8	1654.14	2116.75	2128.97	1351.29	1293.24	1261.8	1307.33	1255.52	1634.03
101.123	1514.94	1603.2	1662.33	1651.59	2117.11	2150.21	1337.67	1303.86	1264.39	1311.33	1260.06	1627.92
101.676	1518.21	1607.77	1653.19	1628.04	2110.5	2213.03	1353.38	1314.37	1267.23	1321.89	1276.37	1631.61
102.229	1543.13	1600.93	1646.87	1623.29	2087.78	2252.92	1379.19	1318.14	1273.59	1340.3	1271.35	1638.94
102.781	1583.08	1588.48	1640.78	1619.84	2043.93	2234.5	1405.23	1315.41	1278.31	1345.54	1242.1	1627.27
103.334	1577.14	1570.48	1657.09	1616.12	2004.11	2193.67	1409.6	1311.93	1273.7	1337.97	1231.45	1615.75
103.886	1547.15	1556.48	1671.4	1604.02	1983.34	2194.05	1406.33	1309.98	1264.12	1319.24	1209.88	1612.83
104.439	1511.47	1554.71	1677.36	1587.52	1992.53	2208.32	1405.01	1307.93	1252.4	1303.05	1207.54	1623.5
104.991	1477.3	1552.74	1681.16	1588.52	1999.91	2209.79	1410.23	1295.74	1240.9	1303.26	1212.02	1625.86
105.544	1466.54	1545.68	1689.53	1591.13	2009.69	2206.95	1420.68	1286.86	1235.33	1298.92	1221.75	1620.05
106.097	1459.96	1544.09	1684.46	1584.86	2010.21	2230.87	1435.43	1279.66	1235.39	1286.12	1222.23	1610.45
106.649	1464.04	1548.82	1678.11	1580.6	1993.27	2249.38	1436.94	1277.67	1234.55	1281.22	1208.93	1616.32
107.202	1477.47	1562.98	1654.89	1578.93	1965.26	2237.93	1420.24	1280.69	1230.49	1295.94	1203.54	1630.95
107.754	1493.67	1577.11	1627.41	1584.49	1950.06	2213.62	1409.3	1293.94	1222.52	1315.04	1215.37	1641.9
108.307	1492.18	1564.26	1617.07	1603.46	1937.73	2157.8	1415.68	1293.1	1213.41	1345.9	1222.95	1651.01
108.86	1473.11	1554.12	1600.95	1636.02	1956.86	2116.34	1428.24	1271.02	1210.25	1341.33	1233.41	1653.3
109.412	1453.17	1551.33	1577.96	1661.91	1979.57	2092	1412.33	1255.12	1212.03	1323.77	1240.92	1639.06
109.965	1437.62	1554	1577.41	1642.49	1985.85	2070.51	1381.52	1244.9	1213.33	1312.68	1239.89	1614.81

## Sheet: Figure 3H
Figure 3H: GLAST fluorescence intensity in E15 Dcckanga mice
Distance (microns)	Wildtype n1	Wildtype n2	Wildtype n3	Wildtype n4	Wildtype n5	Wildtype n6	Wildtype n7	Dcckanga/kanga n1	Dcckanga/kanga n2	Dcckanga/kanga n3	Dcckanga/kanga n4	Dcckanga/kanga n5	Dcckanga/kanga n6
0	1650.27	1755.16	1647.07	1597.37	1601.08	1488.43	1361.59	1933.36	1096.67	1301.22	1437.93	1894.42	1483.8
0.553	1687.46	1763.19	1655.04	1593.53	1602.64	1466.93	1388.21	1919.86	1097.51	1300.69	1440.01	1886.47	1472.98
1.105	1656.98	1802.06	1636.52	1605.34	1616.85	1443.51	1436.53	1901.6	1107.12	1306.62	1453.81	1855.13	1466.54
1.658	1676.78	1810.75	1597.47	1611.79	1641.31	1407.39	1469.55	1893.41	1125.78	1313.68	1458.67	1866.34	1477.64
2.21	1679.84	1827.81	1579.91	1604.22	1665.6	1388.87	1480.5	1899.39	1144.51	1310.1	1450.95	1882.57	1497.79
2.763	1622.94	1828.92	1569.99	1601.06	1644.94	1368.73	1482.37	1887.25	1152.44	1303.31	1460.63	1900.19	1523.83
3.316	1583.49	1834.23	1557.45	1617.06	1629.5	1356.49	1482.14	1851.05	1157.57	1307.75	1464.37	1903.23	1562.9
3.868	1606.6	1790.72	1559.43	1642.51	1642.36	1341.59	1496.5	1805.74	1151.39	1322.83	1455.01	1877.38	1596.49
4.421	1565.41	1772.89	1527.7	1653.19	1655.29	1318.7	1511.85	1770.9	1163.29	1352.02	1457.45	1856.23	1618.16
4.973	1530.54	1757.04	1491.73	1659.83	1667.66	1300.12	1520.26	1758.47	1171.25	1401.93	1472.04	1837.6	1619.63
5.526	1513.29	1743.64	1467.7	1664.09	1694.39	1278.21	1533.5	1760.68	1152.15	1467.98	1474.78	1819.76	1614.82
6.078	1509.32	1651.17	1450.21	1665.8	1714.69	1286.91	1539.93	1766.47	1118.53	1508.86	1462.78	1817.23	1602.74
6.631	1502.56	1587.7	1437.96	1657.74	1718.99	1300.63	1536.94	1786.21	1091.71	1493.08	1491.69	1828.74	1599.61
7.184	1474.74	1534.31	1415.34	1675.46	1695.87	1326.33	1531.59	1836.98	1087.09	1435.55	1521.41	1828.44	1582.83
7.736	1474.62	1514.57	1418.57	1680.1	1658.1	1334.63	1525.66	1905.22	1085.41	1388.02	1511.86	1822.03	1533.33
8.289	1421.9	1520.76	1423.78	1667.96	1622.54	1364.87	1525.64	1947.64	1086.49	1339.88	1483.35	1848.28	1477.34
8.841	1413.07	1501.03	1418.69	1672.27	1590.13	1382.05	1516.22	1940.32	1095.57	1292.16	1469.38	1869.92	1437.5
9.394	1424.84	1498.56	1412.62	1686.38	1561.73	1385.27	1499.79	1900.25	1104.48	1255.32	1473.38	1897.22	1408.77
9.947	1441.07	1503.94	1431.03	1694.05	1516.56	1418.24	1481.69	1860.49	1109.11	1228.78	1486.09	1949.43	1385.6
10.499	1445.02	1518.16	1481.7	1689.24	1466.6	1414.5	1454.12	1829.73	1099.79	1210.22	1512.6	1970.04	1385.31
11.052	1453.51	1513.14	1548.95	1694.74	1422.91	1395.39	1429.09	1821.83	1092.58	1214.11	1532.38	1968.63	1396.27
11.604	1449.99	1505.2	1581.49	1672.49	1384.75	1380.62	1420.15	1816.7	1089.44	1224.25	1515.06	1934.75	1401.68
12.157	1454.47	1495.24	1545.6	1651.04	1353.48	1370.32	1429.9	1818.55	1096.45	1216.17	1483.36	1877.8	1397.49
12.709	1483.68	1479.28	1526.61	1618.72	1347.39	1406.72	1453.82	1820.68	1109.73	1191.57	1465.38	1829.58	1387.56
13.262	1531.03	1466.4	1515.27	1598.57	1377.56	1386.69	1476.31	1819.24	1116.8	1168.37	1460.64	1783.35	1379.8
13.815	1589.26	1445.97	1519.76	1604.31	1419.7	1398.44	1496.03	1817.62	1109.57	1168.28	1465.94	1767.43	1377.01
14.367	1575.36	1428.75	1529.85	1607.67	1445.23	1435.44	1517.39	1833.31	1110.94	1185.39	1471.52	1792.85	1381.26
14.92	1538.13	1426.63	1545.93	1592.99	1450.13	1430.67	1536.16	1866.74	1109.44	1209.75	1464.49	1807.37	1408.01
15.472	1524.45	1430.8	1550.82	1592.07	1439.07	1447.03	1549.73	1881.19	1117.28	1220.73	1446.85	1825.04	1438.31
16.025	1544.13	1420.75	1523.3	1619.17	1427.26	1486.56	1557.93	1832.85	1104.72	1212.93	1425.85	1830.63	1417.84
16.578	1551.62	1457.62	1505.69	1654.12	1415.57	1529.92	1547.09	1772.73	1091.63	1198.74	1410.04	1832.96	1371.49
17.13	1546.77	1443.11	1489.96	1679.75	1395.33	1549.01	1524.17	1712.29	1077.16	1190.87	1413.75	1845.6	1341.31
17.683	1536.54	1421.01	1475.98	1668.55	1364.08	1508.66	1512.37	1654.04	1074.73	1189.75	1445.09	1851.86	1323.92
18.235	1532.22	1408.73	1449.25	1654.28	1336.43	1447.23	1514.97	1604.88	1072.85	1190.45	1513.46	1851.85	1328.97
18.788	1557.37	1388.67	1440.26	1644.73	1314.47	1388.53	1518.44	1570.7	1064.37	1173.88	1580.7	1850.26	1359.73
19.341	1601.81	1404.64	1444.21	1618.51	1293.59	1382.51	1502.94	1559.75	1044.22	1145.23	1578.16	1837.99	1386.72
19.893	1593.32	1409.59	1448.85	1605.26	1289.15	1363.12	1489.28	1585.47	1034.32	1109.04	1553.82	1835.37	1395.07
20.446	1562.28	1404.73	1464.47	1610.56	1285.54	1339.99	1494.74	1627.84	1040.66	1071.56	1548.87	1823.33	1381.83
20.998	1567.69	1435.07	1472.19	1620.9	1298.56	1338.97	1500.22	1677.62	1043.65	1046.01	1523.28	1801.4	1356.81
21.551	1591.13	1417.8	1455.32	1618.18	1337.64	1338.62	1498.73	1733.09	1035.33	1035.88	1494.49	1800.6	1354.7
22.103	1616.45	1408.12	1483.37	1611.97	1375.28	1345.71	1496.81	1785.45	1035.25	1027.48	1488.99	1838.78	1377.11
22.656	1670.27	1368.47	1478	1609.72	1386.3	1344.54	1511.66	1828.04	1026.16	1014.93	1462.04	1884.04	1401.4
23.209	1669.31	1350.29	1502.51	1619.47	1366.83	1316.67	1541.21	1829.38	1019.79	1004.14	1409.51	1894.67	1402.3
23.761	1663.64	1339.34	1565.04	1641.61	1342.84	1292.61	1571.91	1806.63	1041.26	999.202	1403.62	1900.35	1394.97
24.314	1675.7	1350.3	1606.75	1653.37	1341.26	1293.24	1574.44	1810.73	1076.25	1001.37	1416.69	1866.76	1391
24.866	1682.93	1324.01	1640.7	1655.38	1370.89	1293.52	1550.16	1819.34	1108.83	1003.82	1420.23	1833.61	1389.91
25.419	1681.1	1319.45	1661.69	1660.46	1413.2	1289.63	1544.78	1800.07	1123.58	1008.12	1428.93	1805.58	1376.77
25.972	1664.32	1309.66	1703.07	1656.01	1426.01	1287.09	1554.05	1798.67	1110.78	999.825	1426.57	1764.75	1357.82
26.524	1620.73	1288.16	1750.46	1646.51	1406.46	1273.7	1559.61	1813.6	1096.5	990.678	1415.72	1706.51	1341.43
27.077	1617.48	1257.86	1798.27	1649.06	1387.22	1266.5	1590.01	1799.07	1069.62	979.667	1425	1656.3	1306.4
27.629	1665.45	1241.44	1816.33	1637.75	1383.22	1237.46	1599.27	1761.99	1048.49	962.601	1432.59	1616.5	1278.8
28.182	1667.39	1278.51	1818.15	1638.26	1402.32	1204.21	1561.14	1731.96	1047.9	953.596	1431.7	1589.99	1261.49
28.735	1646.93	1296.71	1830.4	1644.31	1433.81	1199.1	1518.34	1717.59	1042.32	956.033	1399.79	1538.21	1255.94
29.287	1644.84	1321.81	1851.28	1617.25	1470.75	1224.78	1485.01	1700.8	1029.61	965.208	1364.91	1495.63	1272.2
29.84	1665.48	1318.13	1840.59	1605.02	1489.07	1240.08	1467.12	1682.55	1019.17	975.158	1338.49	1452.17	1290.85
30.392	1671.84	1297.13	1838.86	1605.53	1478.44	1266.32	1475.42	1662.94	1011.72	992.896	1304.14	1413.66	1300.25
30.945	1639.52	1268.2	1892.26	1634.22	1467.12	1320.32	1486.7	1660.98	1022.15	1009.75	1269.84	1375.63	1284.3
31.497	1669.04	1265.99	1939.36	1678.16	1457.79	1351.63	1484.35	1657.08	1036.04	1006.81	1260.85	1368.19	1262.28
32.05	1665.25	1293.69	1965.57	1690.34	1432.09	1391.43	1482.11	1640.36	1032.5	984.787	1287.88	1399.93	1254.3
32.603	1663.9	1278.98	1998.7	1688.56	1399.47	1411.81	1496.92	1603.17	1020.57	956.082	1341.06	1418	1255.61
33.155	1658.19	1267.29	2035.07	1670.17	1372.64	1423.8	1516.4	1552.01	1013.64	939.459	1374.81	1425.23	1276.13
33.708	1654.31	1260.54	2028.8	1655.25	1352	1424.66	1539.38	1527.98	1002.86	934.355	1373.92	1465.16	1303.53
34.26	1663.7	1278.25	2023.32	1641.83	1353.2	1410.64	1550.51	1539.75	1004.49	937.044	1352.7	1479.65	1321.8
34.813	1699.96	1283.77	1984.58	1598.04	1378.15	1389.63	1556.61	1550.68	1021.6	951.596	1346.11	1435.86	1327.96
35.366	1706.85	1284.81	1961.08	1544.12	1419.72	1360.15	1551.66	1544.11	1029.58	964.541	1360.7	1405.57	1308.8
35.918	1704.18	1254.84	1969.06	1512.08	1455.8	1368.64	1549.92	1518.04	1019.51	971.519	1400.35	1386.08	1285.62
36.471	1726.09	1259.99	1899.98	1492.32	1469.81	1338.34	1568.08	1477.6	1019.27	975.962	1442.23	1391.29	1274.58
37.023	1697.45	1269.57	1848.65	1481.62	1478.43	1307.96	1574.84	1434.83	1029.25	977.852	1463.27	1412.46	1270.27
37.576	1654.66	1279.54	1772.39	1464.44	1493.06	1320.43	1564.37	1418.03	1035.05	973.552	1433.46	1416.24	1269.53
38.128	1614.51	1267.91	1691.7	1458.7	1489.54	1317.18	1549.41	1423.08	1039.14	961.771	1377.79	1407.36	1256.76
38.681	1617.92	1246.33	1603.15	1441.08	1468.65	1311.22	1543.44	1438.81	1041.13	950.563	1344.55	1385.82	1230.81
39.234	1623.44	1277.21	1514.8	1439.68	1449.14	1305.98	1530.14	1467.98	1045.88	947.273	1335.85	1351.52	1211.98
39.786	1607.39	1304.03	1479.97	1453.89	1448.56	1302.45	1513.91	1477.07	1059.26	941.186	1358.82	1328.4	1197.46
40.339	1559.04	1335.54	1498.2	1468.61	1465.15	1309.15	1502.7	1468.1	1071.4	928.038	1371.1	1292	1175.61
40.891	1571.56	1328.98	1529.95	1464.04	1493.16	1303.12	1498.01	1460.84	1076.6	909.339	1380.45	1232.4	1159.12
41.444	1553.83	1353.36	1576.33	1475.07	1518.27	1300.74	1516.97	1460.2	1057.28	889.94	1373.39	1167.34	1152.42
41.997	1499.4	1358.64	1595.05	1483.74	1519	1271.56	1533.46	1450.31	1034.22	879.437	1355.94	1143.15	1150.96
42.549	1488.31	1396.48	1597.9	1487.57	1501.27	1283.83	1532.35	1426.89	1019.67	883.885	1334.97	1136.71	1145.84
43.102	1513.97	1421.79	1587.6	1492.38	1481.02	1303.18	1499.95	1411.5	1027.95	904.311	1303.62	1137.99	1141.81
43.654	1510.17	1426.64	1563.63	1488.36	1470.03	1305.87	1455.16	1395.63	1047.92	938.044	1284.18	1119.84	1137.32
44.207	1488.02	1390.58	1549.78	1499.2	1459.79	1325.48	1441.55	1374.79	1074.72	963.579	1278.85	1084.54	1135.52
44.76	1477.53	1338.26	1522.84	1523.45	1447.15	1334.3	1457.19	1361.93	1097.02	969.322	1273.41	1068.12	1128.36
45.312	1470.33	1327.59	1511.28	1548.66	1444.19	1356.47	1488.68	1361.65	1113.17	962.738	1264.09	1064.58	1121.1
45.865	1473.74	1357.49	1501.53	1583.97	1442.74	1314.31	1517.19	1375.07	1131.46	967.639	1256.01	1072.52	1124.01
46.417	1462.39	1337.32	1507.13	1612.04	1442.64	1273.56	1503.84	1384.71	1155.15	990.492	1249.02	1098.51	1128.39
46.97	1462.39	1323	1503.72	1626.04	1461.03	1188.02	1445.93	1396.31	1183.47	1035.81	1253.51	1128.04	1137.26
47.522	1443.15	1314.37	1482.79	1649.42	1488.15	1140.42	1404.03	1435.67	1193.96	1082.39	1254.95	1152.29	1164.22
48.075	1425.45	1296.93	1472.55	1669.55	1517.5	1128.28	1403.78	1465.01	1179.05	1087.2	1257.49	1149	1198.09
48.628	1436.43	1267.95	1462.84	1664.78	1525.99	1133.59	1421.75	1476.89	1149.19	1055.89	1282.54	1136.55	1222.25
49.18	1444.73	1249.34	1448.81	1660.06	1496.41	1139.77	1438.28	1489.26	1107.13	1010.4	1286.01	1127.79	1224.04
49.733	1453.04	1262.56	1432.33	1660.42	1470.29	1146.37	1434.65	1524.56	1085.59	975.29	1258.58	1099.52	1230.3
50.285	1437.8	1243.42	1435.39	1635.91	1452.12	1167.04	1401.65	1540.61	1080.64	962.393	1248.68	1063.94	1242.48
50.838	1453.21	1205.56	1461.57	1620.31	1441.92	1145.34	1381.44	1514.31	1072.22	967.273	1252.7	1058.55	1240.02
51.391	1463.57	1199.25	1450.53	1624.77	1435.45	1131.83	1414.36	1467.76	1063.55	990.869	1287.33	1060.06	1230.07
51.943	1446.9	1200.51	1501.86	1617.67	1423.13	1143.2	1471.14	1420.08	1059.73	1011.98	1327.14	1058.02	1211.69
52.496	1397.06	1219.39	1536.73	1610.93	1417.71	1138.53	1507.03	1397.94	1064.57	1012.43	1366.13	1057.69	1215.04
53.048	1391.04	1240.85	1516.61	1592.22	1425.23	1148.6	1521.43	1394.66	1088.09	991.738	1393.68	1038.21	1217.29
53.601	1408.38	1262.92	1490.88	1558.31	1437	1141.16	1524.67	1413.7	1092.15	959.694	1426.28	1021.55	1196.2
54.153	1374.88	1283.16	1472.77	1523.47	1437.97	1143.87	1522.27	1460.54	1087.38	937.18	1466.31	1017.8	1163.71
54.706	1350.26	1297.64	1447.5	1526.57	1424.86	1130.92	1522.22	1514.6	1067.01	931.076	1510.67	1027.2	1148.79
55.259	1360.75	1328.4	1452.49	1540.14	1414.91	1131.08	1522.58	1594.39	1043.14	930.12	1548.63	1041.22	1143.61
55.811	1339.45	1289.03	1414.97	1562.79	1416.21	1133.5	1521.84	1668.91	1024.55	926.415	1577.6	1074.13	1135.58
56.364	1312.76	1249.02	1392.04	1581.36	1424.3	1149.12	1531.62	1699.91	1019.2	909.82	1574.23	1125.23	1121.83
56.916	1293.64	1259.74	1359.84	1565.3	1446.7	1161.59	1541.74	1686.47	1017.37	875.492	1539.03	1166.07	1117.28
57.469	1296.22	1284.5	1393.65	1561.97	1468.73	1178.75	1524.45	1640.12	1011.21	842.432	1495.84	1158	1124.73
58.022	1274.7	1287.42	1427.26	1587.7	1480.42	1199.22	1485.28	1567.53	1008.89	824.809	1462.26	1130.41	1141.99
58.574	1278.89	1247.46	1463.09	1609.03	1480.22	1209.18	1460.13	1488.21	1010.59	819.716	1444.38	1144.29	1171.8
59.127	1275.64	1193.3	1455.35	1618.45	1468.02	1209.3	1465.92	1432.98	1011.55	817.475	1435.44	1192.75	1181.4
59.679	1289.55	1158.3	1455.73	1600.69	1454.25	1203.07	1507.86	1377.08	1021.37	813.738	1425.65	1247.33	1177.14
60.232	1326.36	1157.82	1462.41	1574.3	1440.17	1228.59	1570.04	1330.4	1025.38	811	1439.2	1305.3	1168.23
60.785	1368.14	1152.74	1477.55	1558.66	1428.68	1237.38	1624.54	1314.86	1019.15	811.071	1472.58	1318.79	1166.45
61.337	1371.39	1155.3	1501.61	1546.38	1432.36	1240.03	1630.68	1310.35	1013.49	803.098	1513.83	1325.93	1171.4
61.89	1351.66	1195.77	1487.96	1558.17	1466.85	1236.06	1578.85	1320.25	1008.88	793.071	1541.12	1317.84	1168.24
62.442	1395.22	1225.62	1450.54	1607.67	1499.61	1230.03	1519.45	1329.26	1005.15	793.087	1551.27	1270.85	1160.03
62.995	1397.21	1250.15	1450.01	1635.03	1510.68	1267.78	1483.85	1354.65	993.137	805.115	1558.46	1231.06	1153.82
63.547	1389.6	1294.82	1440.14	1632.41	1500.03	1292.2	1459.06	1395.32	983.82	817.771	1578.85	1197.28	1164.75
64.1	1397.27	1254.67	1442.04	1632.54	1492.15	1321.61	1424.05	1431.11	981.055	823.546	1599.2	1176.93	1176.74
64.653	1376.63	1215.24	1440.21	1640.67	1509.31	1292.45	1369.49	1452.62	983.339	825.317	1599.23	1152.79	1178.08
65.205	1363.11	1193.16	1451.44	1655.08	1541.33	1264.54	1313.68	1457.95	988.907	827.06	1587.91	1138.38	1162.28
65.758	1374.66	1176.86	1442.14	1670.48	1572.85	1247.94	1280.21	1446.37	993.175	835.437	1582.7	1132.43	1137.71
66.31	1364.44	1179.97	1418.6	1672.45	1589.94	1249.1	1267.92	1434.53	993.388	849.421	1596.31	1123.23	1121.42
66.863	1332.2	1167.56	1393.65	1668.3	1592.3	1235.23	1284.31	1433.44	989.951	852.137	1609.04	1119.86	1113.01
67.416	1348.01	1162.65	1407.5	1640.17	1571.6	1195.83	1317.23	1438.1	989.803	851.005	1593.95	1138.43	1119.64
67.968	1326.03	1148.78	1391.27	1627.27	1538.14	1173.56	1337.56	1443.64	981.011	852.279	1554.75	1147.75	1142.15
68.521	1307.49	1115.4	1399.49	1607.81	1494.48	1150.1	1339.51	1421.54	962.59	849.94	1511.97	1112.74	1150.54
69.073	1307.47	1108.95	1402.67	1609.16	1443.92	1155.45	1346.77	1398.67	936.415	844.699	1476.53	1085.38	1147.93
69.626	1344.28	1091.33	1385.82	1633.13	1408.83	1145.13	1366.84	1403.74	914.011	850.104	1433.54	1073.49	1138.14
70.179	1402.71	1092.39	1318.81	1645.75	1398.16	1155.47	1397.32	1411.23	899.814	863.978	1398.53	1071.04	1114.81
70.731	1412.07	1120.86	1305.98	1638.51	1403.97	1127.92	1429.87	1413.97	903.803	866.508	1381.63	1075.48	1084.7
71.284	1417.49	1135.85	1316.64	1648.17	1400.83	1104.31	1415.97	1407.04	915.678	853.464	1378.56	1077.64	1058.74
71.836	1379.45	1137.3	1326.48	1649.54	1395.7	1093.61	1383.47	1398.21	925.814	839.18	1392.5	1087.78	1046.39
72.389	1380.96	1137.34	1361.08	1649.01	1405.36	1075.42	1372.51	1415.97	928.65	839.229	1395.74	1098.83	1040.59
72.941	1354.25	1128.39	1335.95	1632.55	1424.93	1071.28	1407.01	1423.28	914.071	844.175	1358.91	1122.33	1039.51
73.494	1294.67	1110.49	1306.07	1611.92	1438.43	1071.24	1476.99	1402.37	896.076	846.016	1305.8	1145.11	1042.38
74.047	1249.74	1114.66	1276.72	1614.45	1440.36	1076.99	1551.58	1380.88	896.481	837.661	1259.68	1168.75	1049.5
74.599	1254.38	1141.87	1282.84	1618.41	1453.04	1095.65	1584.59	1376.99	906.41	819.596	1224.2	1183.46	1049.76
75.152	1249.93	1154.44	1262.65	1609.91	1483.39	1115.38	1568.23	1378.53	910.623	800.634	1193.62	1175.31	1048.8
75.704	1255.62	1140.91	1230.38	1587.94	1506.14	1130.78	1528.12	1367.35	906.765	788.383	1182.83	1182.06	1042.34
76.257	1271.12	1123.42	1213.23	1525.21	1519.88	1151.37	1483.29	1360.79	905.82	783.579	1188	1220.6	1041.67
76.81	1257.22	1104.1	1213.12	1476.38	1535.31	1157.25	1467.17	1362.68	905.699	782.65	1193.04	1237.93	1040.72
77.362	1253.57	1092.39	1228.27	1455.67	1552.87	1154.83	1475.5	1360.27	895.612	778.158	1198.54	1226.24	1053.16
77.915	1218.86	1088.21	1237.56	1455.34	1569.49	1129.52	1486.28	1353.25	890.475	776.098	1200.8	1219.3	1069.88
78.467	1198.91	1100.48	1252.58	1469.73	1575.85	1121.61	1480.22	1341.87	888.224	783.055	1207.19	1201.7	1077.43
79.02	1201.33	1127.45	1254.62	1503.7	1568.94	1139.31	1482.28	1319.9	890.612	791.437	1211.5	1149.31	1065.55
79.572	1215.17	1137.12	1260.24	1540.64	1558.46	1147.39	1514.46	1279.44	896.929	798.678	1200.77	1115.09	1050.65
80.125	1211.5	1185.77	1281.11	1521.4	1552.67	1165.62	1577.94	1242.61	895.557	808.311	1186.39	1108.37	1045.71
80.678	1188.3	1227.98	1262.67	1486.05	1549.06	1187.31	1637.41	1227.29	899.574	817.727	1176.78	1145.32	1044.04
81.23	1179.77	1222.69	1263.51	1461.01	1541.1	1210.94	1685.64	1238.47	909.372	821.918	1165.56	1186.52	1034.61
81.783	1179.57	1226.47	1263.54	1428.79	1527.59	1209.32	1716.99	1259.36	909.541	818.65	1151.32	1235.16	1026.3
82.335	1173.12	1254.87	1244.8	1388.34	1511.25	1213.64	1742.63	1251.7	907.459	813.612	1148.47	1251.26	1026.84
82.888	1178.3	1314.03	1242.7	1350.65	1489.69	1242.78	1767.2	1237.25	906.279	804.896	1158.23	1241.12	1028.62
83.441	1184.02	1335.76	1269.51	1340.7	1464.87	1268.1	1760.27	1231.31	919.995	787.213	1171.26	1202.17	1047.67
83.993	1228.47	1313.06	1293.3	1363.69	1439.86	1265.6	1711.56	1225.92	930.984	766.934	1175.02	1197.52	1071.33
84.546	1277.32	1280.56	1303.31	1398.78	1431	1281.02	1654.41	1245.4	950.541	748.639	1161.93	1226.6	1076.63
85.098	1316.3	1249.3	1300.48	1427.72	1439.56	1274.19	1585.51	1278.95	984.044	734.842	1129.96	1263.12	1069.09
85.651	1301.7	1235.09	1280.51	1459.34	1448.16	1256.55	1499.63	1309.06	985.525	731.59	1094.88	1269.98	1051.26
86.204	1275.22	1213.71	1283.07	1476.69	1459.07	1241.92	1403.75	1342.11	965.098	729.82	1072.2	1262.81	1034.67
86.756	1236.77	1215.87	1277.82	1480.84	1476.52	1236.75	1341.59	1378.93	933.443	729.76	1069.66	1235.38	1020.02
87.309	1220.07	1229.17	1278.67	1475.54	1496.09	1252.87	1327.54	1417.11	924.978	734.148	1071.59	1197.41	1002.03
87.861	1204.09	1244.83	1284.67	1480.64	1497.64	1280.9	1335.08	1426.98	947.415	748.087	1066.37	1176.66	991.213
88.414	1210.9	1291.31	1284.32	1486.94	1481.6	1336.93	1328.21	1411.17	979.634	772	1056.08	1176.26	992.372
88.966	1208.35	1300.4	1311.94	1487.97	1469.72	1342.39	1315.74	1379.14	998.645	791.765	1053.49	1162.14	1002.88
89.519	1184.47	1263.36	1312.22	1506.76	1467.96	1327.71	1313.76	1356.2	1003.05	802.148	1069.34	1163.6	1008.41
90.072	1170.54	1222.66	1282.63	1519.81	1458.23	1274.88	1317.15	1328.78	995.541	806.754	1082.66	1163.91	1011
90.624	1185.36	1212.94	1252.36	1521.61	1439.41	1283.49	1325.51	1287.23	983.005	803.754	1080.68	1165.06	1020.74
91.177	1204.67	1256.43	1218.92	1520.11	1434.94	1316.85	1345.8	1258.82	965.415	803.262	1081.15	1159.34	1029.8
91.729	1237.48	1261.23	1193.53	1524.7	1449.88	1312.54	1363.51	1246.24	949.929	802.082	1084.75	1150.79	1031.08
92.282	1217.7	1231.5	1203.45	1516.45	1474.09	1288.32	1377.61	1250.97	930.503	796.628	1085.8	1165.53	1029.27
92.835	1230.68	1214.46	1190.3	1480.66	1497.87	1261.75	1381.02	1256.08	920.683	797.109	1080.67	1206.19	1040.46
93.387	1262.56	1213.33	1183.35	1475.96	1489.12	1226.31	1372.94	1259.45	923.607	802.142	1059.19	1242.55	1052.51
93.94	1327.8	1210.64	1200.04	1466.55	1456.94	1231.31	1347.4	1263.98	923.087	807.563	1030.49	1275.72	1058.64
94.492	1312.69	1193.13	1205.52	1423.94	1423.01	1216.85	1318.87	1269.25	927.448	808.213	1013.33	1307.16	1051.31
95.045	1270.54	1173.99	1196.27	1376.66	1397.72	1209.56	1304.85	1276.79	935.798	802.607	1005.98	1310.8	1029.09
95.597	1266.45	1176.33	1199.24	1356.93	1386.71	1211.68	1316.84	1311.96	949.732	791.055	1008.35	1317.4	999.863
96.15	1253.94	1191.94	1217.32	1363.13	1375.1	1210.72	1346.56	1362.93	958.415	767.661	1011.4	1329.16	963.355
96.703	1222.76	1208	1232.99	1366.36	1357.99	1235.48	1358.28	1379.96	964.115	740.623	1015.92	1335.8	926.53
97.255	1239.87	1198.66	1255.06	1367.6	1342.9	1258.11	1351.36	1376.81	973.743	724.732	1021.37	1329.17	898.53
97.808	1229.19	1228.38	1262.6	1365.32	1345.03	1244.22	1348.42	1373.04	968.262	721.727	1008.23	1301.94	891.951
98.36	1216.62	1277.03	1269.1	1345.79	1364.06	1216.49	1367.17	1377.69	972.153	727.224	990.716	1299.93	891.623
98.913	1194.27	1289.88	1297.86	1343.34	1393.17	1218.79	1397.4	1384.37	973.18	732.328	989.59	1289.09	897.377
99.466	1200.14	1297.11	1286.74	1340.17	1421.13	1215.96	1400.59	1378.73	982.104	734.475	1004.29	1270.24	904.486
100.018	1204.83	1286.66	1263.25	1347.71	1437.72	1217.11	1386.56	1355.69	989.874	741.612	1032.65	1278	902.492
100.571	1196.15	1241.34	1287.6	1365.42	1456.09	1209.12	1369.38	1321.62	971.596	762.082	1063.07	1311.98	886.399
101.123	1186.77	1240.08	1262.47	1379.3	1466.45	1187.44	1346.51	1284.66	937.891	784.869	1077.38	1348.82	874.41
101.676	1165.34	1233.45	1290.21	1381.6	1464.49	1174.91	1331.41	1241.36	908.525	810.082	1077.86	1348.19	876.213
102.229	1151.57	1205.97	1276.61	1397.03	1455.04	1190.26	1334.13	1199.34	890.721	826.098	1054.98	1321.79	879.918
102.781	1151.61	1223.87	1233.84	1425.37	1432.6	1183.62	1336.93	1186.73	887.951	822.137	1020.44	1281.31	886.251
103.334	1177.84	1221.9	1228.77	1438.5	1403.75	1191.28	1340.17	1180.6	895.076	814.661	996.929	1249.56	893.169
103.886	1192.44	1218.61	1242.56	1414.75	1384.85	1198.86	1349.09	1175.86	909.087	807.257	988.295	1217.72	900.12
104.439	1175.4	1239.96	1266.77	1364.81	1386.49	1199.76	1351.67	1168.46	922.661	795.743	997.481	1164.09	900.71
104.991	1159.57	1255	1294.38	1349.46	1409.3	1165.99	1331.52	1148.56	912.771	783.377	1007.63	1121.85	898.022
105.544	1136.31	1241.12	1315.61	1354.76	1439.28	1122.69	1312.8	1128.93	901.503	774.694	1008.8	1110.57	899.82
106.097	1139.45	1224.93	1286.37	1332.11	1483.28	1093.33	1316.92	1131.79	899.115	761.071	1001.66	1100.49	908.639
106.649	1155.51	1218.41	1282.98	1310.5	1536.14	1084.66	1331.77	1139.23	917.229	735.421	987.738	1098.06	921.623
107.202	1122.3	1243.71	1309.8	1308.97	1578.78	1074.87	1336.44	1130.8	937.033	705.197	979.273	1098.12	934.109
107.754	1103.57	1247.96	1333.82	1311.32	1592.5	1078.74	1324.59	1123.04	944.213	682.109	970.852	1105.58	942.945
108.307	1100.97	1221.73	1355.25	1321.21	1575.88	1087.45	1309.62	1123.12	949.541	672.448	960.213	1127.34	950.109
108.86	1100.44	1219.7	1355.5	1341.13	1557.59	1097.09	1316.43	1120.34	946.678	675.011	955.087	1155.22	941.279
109.412	1105.49	1228.41	1357.44	1317.97	1550.78	1117.13	1336.81	1096.42	935.902	683.568	953.372	1202.96	917.574
109.965	1101.81	1233.33	1365.69	1299.17	1537.89	1140.57	1344.7	1062.11	928.787	688.612	955.426	1250.33	902.404
110.517	1103.51	1241.78	1354.25	1302.44	1513.92	1154.24	1337.72	1041.68	920.208	689.339	945.771	1267.65	895.716
111.07	1112.09	1246.64	1359.5	1303.48	1490.49	1170.21	1307.94	1029.97	920.607	688.585	936.301	1265.56	895.251
111.622	1112.66	1245.77	1366.4	1297.51	1472.39	1185.02	1265.92	1034.88	905.208	690.432	937.721	1274.51	904.973
112.175	1120.07	1218.1	1381.09	1287.86	1457.03	1196.86	1242.51	1042.78	885.219	699.525	943.973	1269.97	921.546
112.728	1131.92	1204.17	1412.41	1273.78	1458.65	1208.46	1247.44	1047.43	872.803	710.24	938.148	1244.41	933.754
113.28	1130.17	1200.72	1426.33	1275.2	1497.46	1166.66	1271.68	1050.18	875.585	714.295	928.24	1210.26	938.475
113.833	1142.3	1215.7	1401.74	1283.46	1544.56	1160.7	1302.88	1045.24	884.557	722.645	927.295	1192.68	950.038
114.385	1179.54	1231.7	1386.14	1281.9	1570.09	1153.94	1317.66	1024.12	887.415	735.721	929.563	1164.73	954.251
114.938	1210.99	1256.99	1386.79	1275.71	1550.93	1152.57	1321.53	1018.49	881.098	745.852	938.776	1151.6	951.016
115.491	1255.37	1250.33	1404.22	1288.97	1484.4	1148.99	1320.85	1033.97	868.273	739.262	947.295	1141.54	936.115
116.043	1268.42	1260.41	1406.14	1295.06	1405.55	1131.94	1315.88	1052.84	870.049	728.087	948.344	1130.96	918.197
116.596	1276.01	1249.21	1429.41	1293.06	1337.67	1104.87	1312.3	1076.11	864.295	720.634	940.191	1133.83	894.65
117.148	1263.38	1221.59	1418.44	1293.05	1301.42	1083.84	1304.88	1103.54	864.94	711.721	938.82	1139.19	867.847
117.701	1243.77	1202.05	1416.85	1286.68	1281.34	1054.93	1295.55	1137.04	863.109	699.514	935.885	1125.41	840.066
118.254	1235.62	1200.47	1413.49	1265.66	1288.42	1030.7	1293.15	1158.04	868.639	684.229	922.825	1108.02	821.902
118.806	1247.2	1175.14	1445.36	1238.02	1304.92	1020.71	1305.18	1162.36	889.437	674.809	896.049	1116.68	814.219
119.359	1258.53	1172.33	1428.84	1224.8	1330.75	1021.38	1316.68	1139.74	915.76	679.432	874.831	1151.37	805.721
119.911	1243.62	1169.6	1432.03	1213.84	1349.2	1049.23	1307.52	1118.22	960.536	687.076	862.306	1185.31	803.525
120.464	1246.13	1176.62	1409.16	1185.6	1358.94	1054.92	1279.25	1109.86	1007.9	698.552	856.661	1223.51	802.738
121.016	1245.73	1187.51	1411.14	1162.32	1373.16	1055.2	1245.43	1113.99	1041.02	718.814	849.705	1281.84	806.929
121.569	1250.39	1198.31	1422.83	1156.86	1377.82	1072.23	1224.42	1108.98	1055.08	730.268	848.47	1328.34	811.645
122.122	1292.77	1190.34	1415.28	1167.82	1375.87	1087.63	1227.37	1101.28	1041.46	730.497	850.459	1309.23	830.049
122.674	1340.15	1179.55	1422.74	1175.72	1368.38	1100.69	1252.55	1096.18	1016.98	725.661	853.044	1247.18	855.322
123.227	1356.33	1197.9	1438.77	1184.75	1360.56	1090.87	1284.21	1094.09	1001.76	723.311	850.623	1195.41	875.94
123.779	1361.35	1186.96	1463.36	1197.91	1353.28	1085.94	1299.66	1088.15	994.071	719.213	836.678	1181.8	890.257
124.332	1353.01	1197.31	1413.57	1194.14	1343.27	1081.76	1307.57	1095.52	994.579	709.448	827.279	1180.01	912.628
124.885	1342.16	1190.11	1373.16	1178.54	1331.8	1078.04	1320.46	1107.99	999.678	696.738	828.88	1178.46	921.574
125.437	1323.33	1174.46	1323.43	1165.07	1317.01	1072.06	1337.09	1120.45	997.798	683.689	843.191	1160.23	919.563
125.99	1325.22	1137.57	1316.99	1164.62	1302.84	1090.05	1341.7	1125.49	986.743	682.978	863.568	1132.37	913.481
126.542	1316.22	1114.32	1310.56	1169.8	1294.83	1098.72	1320.91	1127.54	973.022	690.033	889.869	1113.99	904.071
127.095	1283.6	1105.1	1308.92	1164.45	1293.67	1130.43	1301.72	1120.37	970.071	693.06	909.962	1115.12	895.891
127.648	1267.1	1092.37	1305.53	1152.23	1286.77	1146.22	1301.14	1123.79	979.552	685.995	921.945	1130.34	886.53
128.2	1282.26	1095.28	1318.22	1135.9	1283.06	1145.38	1309.13	1133.74	974.678	679.863	934.574	1135.3	878.322
128.753	1285.62	1111.16	1279.53	1124.44	1284.85	1129.08	1304.19	1144.93	967.776	671.475	946.202	1121.84	873.705
129.305	1280.86	1127.13	1285.25	1134.43	1288.75	1109.49	1287.7	1141.04	974.049	664.426	947.235	1114.08	866.776
129.858	1283.8	1107.81	1288.33	1134.58	1291.99	1097.98	1277.92	1125.09	951.749	660.721	943.251	1127.31	855.142
130.41	1259.56	1105.65	1296.44	1140.09	1300.84	1085.8	1272.7	1112.47	918.645	667.891	924.694	1141.54	836.301
130.963	1239.97	1112.81	1293.59	1128.74	1300.41	1079.63	1254.35	1111.37	888.082	682.071	908.481	1132.09	816.601
131.516	1257.01	1112.43	1303.62	1121.12	1293.67	1073.36	1242.13	1140.65	864.672	692.033	900.514	1106.41	796.874
132.068	1342.65	1136.6	1285.9	1134.66	1279.91	1071.69	1239.91	1187.55	845.913	691.18	893.727	1100.05	796.317
132.621	1379.52	1139.6	1282.41	1144.25	1262.01	1074.37	1256.49	1206.3	843.836	684.186	881.164	1104.21	810.492
133.173	1434.45	1147.62	1246.66	1140.2	1244.17	1075.59	1287.32	1179.61	847.246	674.137	868.612	1095.02	832.956
133.726	1441.91	1150.59	1226.41	1122.77	1226.04	1067.45	1304.12	1137.32	840.257	672.607	858.585	1087.57	861.672
134.279	1436.62	1149.25	1235.39	1128.15	1209.09	1043.04	1295.01	1117.11	833.044	670.415	848.738	1081.32	886.104
134.831	1433.83	1119.57	1237.5	1145.77	1192.51	1042.96	1272.91	1108.4	833.169	658.836	839.339	1093.45	903.771
135.384	1396.22	1090.58	1252.26	1143.57	1181.18	1040.69	1264.16	1103.3	844.683	644.541	828.235	1094.59	930.153
135.936	1364.66	1110.01	1262.13	1145.83	1179.17	1006.78	1257.58	1114.16	855.24	626.361	819	1112.16	969.661
136.489	1318.91	1119.17	1267.97	1138.46	1192.74	995.689	1250.28	1114.49	867.984	615.005	817.027	1130.6	996.847
137.041	1290.69	1106.81	1263.7	1139.96	1221.8	991.328	1232.55	1079.83	871.033	607.022	816.459	1125.31	996.448
137.594	1288.01	1095.66	1282.56	1122.01	1242.68	1006.85	1214.19	1032.55	867.208	600.464	813.71	1107.28	981.776
138.147	1303.7	1109.72	1272.23	1102.4	1251.06	1015.35	1201.34	1000.92	878.683	602.53	805.738	1107.9	967.18
138.699	1304.03	1130.68	1292.47	1103.04	1250.47	1008.34	1178.09	1004.98	890.508	607.803	787.339	1127.39	951.115
139.252	1263.04	1166.4	1291.62	1110.34	1251.98	1008.79	1154.11	1034.02	889.437	615.202	768.12	1157.14	950.628
139.804	1228.81	1202.26	1283.76	1132.25	1278.66	1019.41	1143.61	1076.24	877.94	626.126	768.743	1188.9	964.579
140.357	1195.51	1118.73	1254.93	1144.03	1315.15	1026.02	1149.2	1113.97	872.552	641.891	780.776	1217.43	969.104
140.91	1208.76	1079.53	1235.25	1152.94	1328.85	1021.99	1159.87	1126.67	871.066	651.989	785.426	1239.73	954.29
141.462	1213.87	1080.88	1269.91	1153.51	1333.24	1009.51	1156.41	1126.79	867.372	655.361	778.443	1228.62	932.918
142.015	1214.8	1070.11	1253.84	1157.55	1343.25	1011.72	1145.4	1125.05	856.94	649.208	768.984	1198.14	901.825
142.567	1207.79	1063.88	1252.96	1165.47	1349.93	1014	1132.53	1131.17	849.924	637.65	767.011	1187.02	878.579
143.12	1195.6	1063.73	1253.77	1180.03	1339.31	1018.84	1130.61	1139.16	852.579	632.699	773.978	1208.91	862.962
143.673	1208.29	1074.63	1259.71	1189.17	1316.63	1007.1	1134.56	1142.15	855.322	637.186	785.978	1225.42	856.011
144.225	1180.13	1087.74	1242.14	1175.63	1299.76	1001.4	1139.04	1126.71	854.781	647.301	791.257	1225.57	854.956
144.778	1190.57	1110.7	1249.24	1151.55	1295.04	1000.4	1140.47	1133.02	861.393	663.464	791.568	1192.47	851.514
145.33	1193.94	1124.3	1289.64	1143.36	1306.36	996.825	1146.98	1136.1	873.585	685.732	787.858	1158.2	849.219
145.883	1178.43	1121.9	1365.28	1144.32	1322.25	985.066	1173.77	1134.27	884.131	703.492	786.885	1156.12	848.093
146.435	1176.36	1115.62	1366.46	1154.73	1336.62	975.005	1212.62	1138.56	883.109	708.59	792.541	1164.01	844.563
146.988	1185.75	1107.26	1344.51	1156.5	1352.51	954.219	1241.92	1141.48	877.585	716.891	807.557	1169.21	839.492
147.541	1198.02	1104.13	1348.65	1144.67	1357.9	928.831	1261.04	1115.63	889.776	715.284	821.322	1159.36	830.475
148.093	1209.31	1096.2	1320.28	1123.31	1355.74	909.235	1278.19	1070.76	896.082	702.792	825.984	1153.87	823.568
148.646	1230.84	1060.14	1271.2	1104.45	1341.03	904.486	1277.88	1031.44	906.383	690.656	818.257	1151.28	810.033
149.198	1233.64	1056.34	1245.2	1093.88	1307.83	909.65	1253.34	1004.78	933.448	684.005	816.519	1140.8	796.53
149.751	1274.34	1062.59	1244.02	1086.08	1271.66	913.011	1215.3	982.35	956.454	689.415	804.552	1128.53	786.213
150.304	1283.68	1049.63	1220.92	1093.67	1238.98	923.568	1184.37	967.934	976.076	707.137	799.94	1119.57	775.607
150.856	1267.07	1054.33	1219.3	1112.54	1219.82	944.164	1167.99	957.475	961.809	737.104	799.333	1128.67	766.683
151.409	1228.2	1055.28	1225.31	1118.7	1220.99	964.754	1164.64	944.372	926.568	763.607	796.459	1121.26	762.574
151.961	1183.41	1044.77	1243.91	1128.12	1229.97	994.541	1181.38	943.978	914.044	779.131	795.464	1087.32	764.224
152.514	1136.64	1039.64	1265.3	1126.12	1244.95	1010.36	1204.38	952.142	892.437	777.836	792.945	1055.72	759.202
153.066	1118.16	1037.05	1270.95	1122.45	1263.22	1029.66	1224.33	966.454	876.967	760.705	794.426	1037.49	761.53
153.619	1116.11	1053.81	1299.19	1118.73	1277.68	1013.54	1236.13	976.847	860.224	745.967	799.885	1053.41	770.705
154.172	1151.42	1055.75	1303.88	1125.92	1288.86	997.645	1237.4	994.229	857.475	740.831	814.317	1069.15	783.596
154.724	1169.62	1068.06	1289.56	1136.53	1283.01	983.76	1232.48	1007.05	850.579	736.131	809.557	1080.39	794.464
155.277	1205.33	1070.92	1311.45	1155.02	1281.14	965.563	1216.66	1012.41	837.667	727.519	806.656	1081.59	793.514
155.829	1224.55	1061.36	1293.28	1165.81	1279.91	954.612	1198.36	1020.4	828.694	722.831	816.443	1076.46	788.421
156.382	1213.87	1047.3	1296.29	1180.42	1271.26	957.781	1196.1	1025.96	832.738	729.158	832.891	1048.55	776.492
156.935	1195.54	1024.67	1286.38	1213.24	1267.17	968.148	1213.19	1037.56	852.202	734.53	847.557	1022.29	772.24
157.487	1167.38	1016.28	1298.46	1239.31	1281.16	967.852	1223.7	1046.69	872.705	736.934	852.448	1000.45	770.148
158.04	1162.8	1024.41	1304.62	1244.35	1290.18	951.787	1219.4	1062.35	900.661	735.902	848.634	987.049	774.902
158.592	1169.02	1037.68	1281.5	1235.14	1284.1	957.82	1217.28	1091.09	921.35	730.956	838.973	969.552	781.508
159.145	1192.8	1050.8	1249.23	1249.17	1270.69	976.842	1224.02	1135.05	923.945	727.661	831.863	962.41	781.765
159.698	1186.87	1086.93	1225.35	1260.2	1250.17	988.383	1218.55	1188.38	918.284	725.612	816.607	950.295	786.355
160.25	1200.59	1113.7	1203.1	1279.95	1237.79	972.907	1203.42	1229.6	900.612	723.12	798.47	929.885	796.787
160.803	1206.46	1104.99	1177.75	1269.66	1238.32	947.126	1192.17	1225.15	889.393	720.033	781.924	900.41	809.924
161.355	1231.66	1092.96	1181.81	1251.79	1242.58	930.115	1194.13	1220.99	900.738	718.88	770.929	911.038	819.202
161.908	1237.1	1103.38	1189.96	1223.46	1247.38	900.672	1193.46	1235.38	898.699	704.432	771.317	931.361	813.022
162.46	1219.57	1104.56	1184.22	1211.02	1258.03	889.393	1189.65	1253.2	881.377	685.497	772.41	952.027	800.235
163.013	1195.48	1101.46	1173.06	1208.99	1270.4	892.656	1183.78	1258.62	862.634	676.142	773.514	974.049	792.781
163.566	1214.09	1079.99	1223.6	1200.19	1283.64	891.454	1183.63	1249.23	844.448	682.896	780.989	1002.21	791.104
164.118	1193.02	1071.75	1269.76	1173.08	1299.38	898.47	1188.66	1232.28	822.721	711.503	792.929	1035.56	801.667
164.671	1177.75	1055.97	1289.57	1153.65	1312.93	918.497	1195.28	1216.44	811.082	752.273	805.617	1059.4	817.464
165.223	1137.57	1062.9	1294.46	1150.79	1324.8	906.667	1210.45	1199.18	789.464	787.749	829.689	1077.68	828.984
165.776	1129.08	1067.43	1303.25	1144.79	1333.32	884.306	1226.03	1173.96	789.721	809.202	840.262	1077.53	842.148
166.329	1106.53	1054.45	1326.83	1131.26	1342.14	867.847	1234.9	1160.49	812.787	815.585	833.519	1076.34	847.585
166.881	1108.83	1040.2	1339.75	1111.08	1357.52	856.104	1235.61	1186.53	841.825	799	824.514	1086.22	846.667
167.434	1114.91	1010.05	1337.01	1093.2	1364.89	852.377	1228.96	1229.3	874.918	780.066	823.809	1107.27	841.557
167.986	1155.01	1004.62	1314.8	1087.77	1365.03	842.53	1213.51	1253.6	902.284	782.907	820.273	1125.72	831.432
168.539	1203.69	995.175	1302.88	1092.98	1358.15	849.53	1189.33	1256.86	899.683	790.995	806.503	1119.4	805.995
169.092	1243.81	988.213	1327.4	1091.3	1336.62	860.59	1169.82	1258.15	897.475	775.366	788.612	1105.99	779.82
169.644	1273.08	983.464	1322.66	1080.94	1299.33	881.607	1159.68	1240.49	892.268	749.295	781.486	1083.31	771.738
170.197	1301.44	969	1343.4	1069.3	1261.59	910.678	1151.04	1181.57	870.738	730.995	784.503	1082.78	772.12
170.749	1322.03	961.585	1317.42	1075.72	1234.26	933.115	1142.09	1118.12	852.656	715.918	799.131	1085.54	762.552
171.302	1292.95	969.219	1291.09	1068.42	1206.57	954.098	1144.61	1090.37	842.836	701.907	811.689	1083.56	750.639
171.854	1250.83	979.497	1281.98	1062.57	1183.79	968.361	1140.89	1079.41	847.295	689.716	823.552	1067.15	743.896
172.407	1245.17	984.459	1230.74	1063.67	1170.98	958.781	1129.24	1064.83	868.219	680.798	836.295	1049.04	750.35
172.96	1279.49	984.683	1193.8	1058.95	1167.79	937.596	1125.93	1060.34	883.53	671.126	840.503	1056.49	767.279
173.512	1319.29	1004.86	1154.72	1053.76	1165.99	933.076	1109.99	1062.64	896.623	666.623	827.415	1076.15	786.333
174.065	1314.37	1001.33	1122.37	1052.77	1166.27	931.186	1094.28	1046.38	900.896	674	818.924	1089.12	808.771
174.617	1277.53	999.197	1080.22	1045.24	1177.28	921.94	1093.53	1023.96	908.208	690.858	810.694	1125.54	826.814
175.17	1216.07	995.678	1047.77	1054.77	1198.64	932.251	1106.06	1009.84	916.246	715.858	810.814	1149.23	838.852
175.723	1172.3	1007.33	1015.97	1053.06	1221.38	911.601	1132.41	1012.21	920.126	753.093	813.399	1163.91	846.699
176.275	1146.73	1018.76	978.186	1064.05	1239.24	901.792	1161.22	1020.81	926.771	782.087	823.344	1161.72	845.656
176.828	1106.79	1019.4	960.038	1060.08	1250.93	881.574	1155.62	1041.02	930.689	790.011	845.754	1160.44	835.738
177.38	1079.63	1034.9	969.639	1062.36	1250.36	871.842	1113.64	1060.9	950.519	784.224	870.421	1151.14	826.924
177.933	1053.04	1060.26	991.229	1069.37	1241.42	859.601	1064.86	1074.12	944.355	777.727	888.596	1146.35	827.055
178.485	1048.46	1070.34	1001.25	1077.03	1233.34	854.076	1049.74	1082.34	939.109	776.924	896.071	1168.68	828
179.038	1071.07	1060.36	1014.09	1075.68	1236.04	842.115	1058.45	1086.93	949.727	783.246	900.749	1210.53	825.377
179.591	1049.07	1061.7	1002.64	1071.45	1240.14	820.191	1074.82	1083.37	954.016	792.115	909.65	1227.83	818.76
180.143	1017.96	1062.09	990.929	1079.94	1242.69	822.847	1098.51	1087.91	966.727	797.525	913.656	1210.27	819.716
180.696	1004.62	1046.4	959.175	1085.88	1250.79	816.066	1119.15	1096.69	982.984	799.787	903.967	1184.61	816.492
181.248	1017.96	1041.81	920.383	1079.33	1262.21	818.907	1129.99	1097.12	976.115	788.814	884.934	1181.83	797.208
181.801	1038.59	1042.91	907.699	1068.82	1286.38	821.109	1135.06	1082.64	937.492	761.404	878.596	1188.4	765.262
182.354	1052.37	1032.5	908.792	1063.71	1309.7	825.973	1132.49	1067.29	912.055	727.809	881.585	1155.63	737.104
182.906	1053.53	1049.85	934.749	1069.73	1314.6	837.76	1128.36	1059.8	901.126	704.825	889.027	1111.51	711.519
183.459	1036.47	1074.08	958.678	1067.56	1301.77	852.115	1137.75	1052.05	908.005	699.852	897.852	1087.17	684.885
184.011	1054.49	1064.77	970.661	1064.06	1285.51	850.333	1153.49	1048.55	903.306	708.858	900.563	1077.68	660.191
184.564	1070.54	1063.69	967.984	1049.03	1266.15	827.852	1169.36	1048.22	885.65	712.787	897.235	1095.59	642.257
185.117	1069.53	1058.81	974.027	1044.93	1244.95	812.973	1185.59	1053.97	887.831	711.667	888.809	1094.87	640.568
185.669	1094.6	1043.98	958.689	1038.6	1236.16	829.464	1197.61	1057.42	887.989	708.787	875.044	1085.56	647.093
186.222	1105.47	1038.85	944.836	1037.78	1229.73	829.645	1200.2	1062.87	883.727	700.918	862.574	1079.59	656.574
186.774	1113.15	1020.6	949.885	1025.75	1218.68	835.18	1189.16	1061.1	891.519	687.317	852.169	1078.31	670.066
187.327	1100.02	1014.13	966.568	1014.89	1212.01	836.765	1162.2	1056.15	909.951	668.29	840.497	1076.49	683.623
187.879	1067.09	1003.91	987.563	1010.19	1208.94	834.049	1120.4	1058.75	928.301	649.781	827.301	1064.99	702.027
188.432	1040.97	998.044	1003.09	1014.48	1189.86	835.344	1075.13	1062.53	943.191	642.24	822.71	1051.42	724.082
188.985	1026.23	1002.01	1023.69	1018.05	1172.22	858.142	1047.26	1049.26	943.727	652.951	824.699	1050.87	738.328
189.537	1065.43	1006.63	996.464	1025.5	1165.94	850.519	1032.07	1038.55	918.126	667.175	832.628	1064.31	732.831
190.09	1094.17	1006.37	988.18	1039.86	1165.72	828.027	1025.98	1029.87	893.093	671.355	844.546	1078.6	734.563
190.642	1120.91	1013.65	967.858	1040.18	1160.31	811.792	1034.44	1039.29	875.464	670.634	841.656	1077.94	742.454
191.195	1168.13	1025.44	944.852	1025.66	1154.71	801.579	1053.06	1043.06	860.12	673.771	833.246	1081.57	755.863
191.748	1195.8	1035.37	940.765	1015.29	1160.31	786.175	1061.87	1020	852.393	681.874	825.273	1098.58	772.437
192.3	1194.44	1048.71	926.049	1015.46	1182.3	792.924	1053.44	985.005	849.011	675.557	814.508	1113.89	779.186
192.853	1217.44	1062.63	929.607	1021.13	1205.14	802.82	1050.64	967.776	847.115	666.454	804.126	1143.14	779.175
193.405	1226.31	1044.56	934.24	1017.82	1216.43	796.929	1056.8	964.989	853.798	675.781	795.913	1156.04	776.934
193.958	1238.58	1034.77	943.169	1015.23	1215.56	787.667	1062.84	967.022	859.814	700.721	793.798	1163.66	768.814
194.51	1238.95	1020.64	941.601	1002.01	1199.34	776.366	1064.13	988.098	859.934	721.426	790.738	1144.45	750.191
195.063	1179.78	1000.5	949.978	984.765	1182.95	787.891	1063.87	1031.26	854.962	720.464	782.246	1111.96	747.836
195.616	1086.9	993.924	971.94	977.47	1177.39	823.607	1064.76	1069.93	850.732	707.005	777.333	1099.55	762.781
196.168	1036.27	980.967	990.213	992.924	1176.05	832.087	1061.47	1105.54	870.956	687.257	782.601	1076.03	783.71
196.721	1040.67	991.639	1016.49	1005.03	1181.9	843.153	1055.01	1126.61	883.71	672.689	794.246	1080.27	808.191
197.273	1032.57	1019.44	1008.07	1009.12	1189.54	862.197	1060.79	1160.43	893.454	675.705	815.153	1089.16	829.18
197.826	1027.37	1034.13	991.251	1013.52	1198.64	870.525	1070.37	1219.77	890.552	687.229	838.355	1098.8	850.148

## Sheet: Figure 3I
Figure 3H: GLAST fluorescence intensity in E16 Dcckanga mice
Distance micron	Wildtype n1	Wildtype n2	Wildtype n3	Wildtype n4	Wildtype n5	Wildtype n6	Wildtype n7	Wildtype n8	Dcckanga/kanga n1	Dcckanga/kanga n2	Dcckanga/kanga n3	Dcckanga/kanga n4	Dcckanga/kanga n5	Dcckanga/kanga n6
0	2150.19	2695.44	2305.53	2285.45	2130.59	2298.35	2298.32	2517.81	2390.28	2027.12	2548.9	1917.62	1960.15	1506.43
0.552	2101.5	2668.11	2307.7	2250.3	2078.62	2333.08	2358.99	2579.52	2302.84	2024.93	2554.87	1845.79	1923.13	1536.41
1.104	2072.92	2654.3	2245.95	2220.35	2015.82	2334.6	2437.69	2517.17	2298.24	2001.01	2544.81	1799.64	1846.88	1546.81
1.657	2039.12	2581.37	2137.47	2223.58	2065.61	2309.47	2367.68	2410.85	2344.89	2001.98	2560.16	1780.42	1777.06	1602.07
2.209	1991.14	2504.69	2046.18	2223.7	2125.75	2323.31	2289.35	2348.87	2384.23	2007.78	2531.87	1768.68	1739.71	1663.65
2.761	1976.88	2443.39	1934.53	2202.96	1994.12	2317.85	2229.46	2403.76	2412.72	1979.7	2438.45	1761.99	1708.94	1714.29
3.313	1953.74	2397.49	1944.8	2203.33	1868.26	2227.59	2188.9	2481.35	2416.68	1950.01	2373.68	1774.5	1672.14	1740.32
3.866	1919.34	2365.58	1960.4	2251.25	1842.49	2155.85	2139.53	2471.6	2408	1918.94	2335.68	1804.05	1647.42	1714.69
4.418	1875.19	2339.28	2019.41	2278.72	1789.26	2137.12	2104	2390.68	2415.92	1884.68	2364.42	1793.65	1635.89	1697.51
4.97	1802.91	2292.3	1987.16	2276.07	1776.15	2173.85	2055.11	2366.84	2441.07	1865.89	2390.49	1777.69	1651.65	1729.64
5.522	1744.14	2248.31	1940.87	2332.49	1836.69	2233.29	2052.57	2330.86	2427.18	1878.55	2409.84	1798.92	1699.08	1750.44
6.075	1733.04	2214.51	2002.47	2382.89	1852.79	2323.92	2056.08	2353.42	2387.68	1890.49	2434.12	1819.75	1722.96	1703.82
6.627	1721.67	2248.97	2035.58	2417.56	1862.35	2356.8	2045.94	2412.08	2346.06	1874.4	2425.71	1822.32	1712.94	1630.53
7.179	1709.87	2343.48	2021.78	2407.75	1810.13	2325.67	2031.82	2459.19	2340.03	1872.14	2368.32	1800.47	1695.68	1622.64
7.731	1731.46	2452.96	2013.38	2375.54	1838.97	2191.85	2093.68	2474.45	2346.76	1874.03	2289.05	1764.64	1690.13	1657.12
8.284	1749.52	2515.66	1946.09	2313.62	1840.82	2095.65	2198.76	2521.76	2363.98	1872.71	2210.85	1756.02	1673.03	1721.29
8.836	1818.28	2567.42	1962.36	2272.36	1790.95	2146.55	2291.91	2527.19	2362.8	1823.88	2193.79	1746.85	1630.56	1762.86
9.388	1862.6	2567.46	1918.99	2305.56	1706.71	2186.24	2325.57	2499.25	2330.42	1739.08	2187.35	1727.35	1549.91	1834.08
9.94	1857.75	2551.68	1878.5	2379.48	1728.05	2148.81	2312.89	2424.52	2293.6	1685.74	2146.14	1652.9	1481.23	1884.19
10.492	1800.48	2542.18	1899.24	2348.04	1760.06	2036.08	2211.11	2337.64	2293.84	1643.72	2119.73	1570.75	1431.25	1889.43
11.045	1797.86	2521.02	1948.45	2329.13	1738.81	1944.71	2067.61	2206.7	2314.8	1623.01	2084.93	1518.91	1436.03	1885.93
11.597	1838.1	2500.39	2023.9	2350.77	1712.92	1864.88	1976.12	2090.87	2356.85	1634.4	2037.63	1478.33	1458.59	1880.56
12.149	1830.26	2456.46	1957.66	2366.64	1672.39	1823.87	2014.18	2035.36	2371.59	1663.04	2028.38	1462.31	1487.08	1860.99
12.701	1806.26	2443.58	1957.19	2372.37	1637.63	1893.86	2118.75	2013.38	2332.02	1701.08	2057.53	1460.32	1524.79	1788.98
13.254	1785.09	2418.53	1961.3	2343.8	1652.36	1934.48	2143.5	2061.67	2263.03	1747.07	2057.51	1463.59	1588.24	1729.36
13.806	1810.45	2375.98	1839.84	2243.64	1637.26	1957.06	2110.22	2059.08	2203.58	1795.12	2086.79	1492.27	1619.13	1682.48
14.358	1885.16	2316.53	1822.64	2158.96	1611.52	1956.15	2045.29	2041.06	2185.15	1807.48	2146.85	1532.12	1628.34	1672.56
14.91	1863.65	2261.51	1780.03	2092.12	1626.3	1964.14	1999.42	2043.56	2179.12	1772.53	2154.33	1559.64	1600.99	1685.03
15.463	1763.84	2287.32	1717.87	2090.25	1644.67	1988.6	1930.04	1959.65	2181.3	1716.38	2121.41	1551.18	1554.21	1654.55
16.015	1700.81	2340.29	1738.04	2134.19	1669.3	1951.1	1926.75	1914.18	2178.37	1652.46	2130.35	1529.15	1496.37	1623.26
16.567	1691.13	2383.98	1764.16	2205.37	1700.36	1892.04	1943.4	1972.16	2189.86	1613.17	2109.15	1543.56	1462.47	1605.98
17.119	1698.21	2427.13	1747.3	2263.84	1786.86	1852.04	1882.45	2035.08	2189.5	1589.08	2080.12	1540.01	1468.86	1646.62
17.672	1644.46	2440.28	1683.26	2332.09	1821.31	1823.57	1775.53	2061.92	2200.53	1550.33	2105.08	1521.89	1525.07	1675.68
18.224	1611.31	2429.22	1591.48	2369.35	1828.83	1757.38	1721.29	2131.79	2233.74	1509.85	2158.55	1511.75	1581	1683.51
18.776	1636.21	2465.34	1632.51	2366.04	1876.87	1743.47	1685.69	2211.16	2265.75	1479.81	2263.5	1558.27	1612.03	1704.25
19.328	1662.12	2486.05	1657.15	2338.2	1865.69	1739.38	1675.3	2250.82	2274.57	1465.62	2305.83	1615.56	1589.23	1704.28
19.88	1685.72	2477.65	1652.29	2335.41	1847.8	1731.04	1686.51	2211.21	2276.24	1459.01	2294.78	1631.28	1545.01	1702.55
20.433	1671.95	2410.92	1617.88	2330.16	1889.59	1682.3	1660.37	2162.94	2297.81	1457.41	2278.3	1584.03	1533.9	1698.18
20.985	1662.13	2262.98	1665.36	2261.7	1876.14	1674.27	1647.09	2180.25	2291.12	1455.52	2256.77	1538.72	1563.85	1738.74
21.537	1664.3	2128.6	1728.12	2192.96	1834.92	1676.08	1651.62	2192.9	2256.43	1464.42	2242.79	1544.57	1592.96	1807.07
22.089	1671.6	2065.47	1794.13	2117.91	1765.51	1708.19	1643.37	2157.35	2218.55	1461.52	2295.51	1565.9	1564.32	1827.95
22.642	1667.82	2064.31	1800.21	2051.97	1747.74	1715.38	1605	2122.22	2156.74	1439.13	2345.26	1600.48	1508.06	1768.62
23.194	1658.62	2051.15	1839.19	2016.79	1724.91	1666.76	1572.57	2075.7	2106.45	1413.01	2292.36	1611.55	1455.07	1707.04
23.746	1692.16	2019.84	1820.24	1979.42	1785.38	1658.18	1572.48	2020.55	2086.85	1407.79	2220.04	1618.73	1415.62	1659.68
24.298	1703.21	1982.47	1780.56	1928.29	1777.13	1651.16	1604.31	2017.21	2122.85	1430.88	2206.78	1654.43	1392.06	1604.26
24.851	1687.71	1949.37	1831.58	1924.8	1682.56	1670.98	1650.09	2048.39	2137.19	1463.77	2191.06	1652.55	1369.47	1597.82
25.403	1675.92	1966.4	1853.07	1899.99	1672.35	1693.58	1732.92	2080.81	2142.11	1507.33	2128.81	1625.43	1360.07	1645.55
25.955	1613.89	2020.19	1907.91	1901.64	1718.14	1698.15	1771.9	2115.41	2155.9	1574.8	2099.49	1599.69	1384.1	1665.06
26.507	1575.06	2077.2	1852.87	1996.2	1725.4	1737.06	1753.25	2115.76	2191.9	1670.75	2074.71	1565.99	1413.52	1681.8
27.06	1609.47	2089.84	1817.71	2107.11	1804.55	1690.21	1715.18	2077.32	2259.71	1757.14	2092.95	1533.59	1445.1	1717.13
27.612	1673.19	2070.54	1748.46	2121.89	1731.98	1628.82	1663.2	1992.68	2305.31	1816.23	2086.28	1502.1	1458.58	1749.36
28.164	1741.95	2018.77	1653.85	2101.53	1726.81	1703.45	1619.29	1912.35	2314.86	1811.19	2021.62	1488.34	1443.52	1716.58
28.716	1742.72	2017.09	1544.92	2106.42	1773.28	1789.74	1620.61	1860.38	2326.09	1775.06	1996.69	1477.34	1429.94	1669.4
29.268	1719.92	2041.36	1563.23	2140.31	1828.51	1831.8	1681.65	1843.24	2336.37	1710.99	1996.19	1456.32	1420.52	1632.79
29.821	1701.38	2051.54	1519.81	2121.46	1873.31	1849.36	1671.27	1855.49	2343.45	1640.98	2050.81	1474.19	1402.66	1581.85
30.373	1714.72	2042.81	1487.76	2101.17	1931.73	1862.97	1633.38	1914.11	2362.98	1597.88	2131.7	1481.9	1401.62	1532.56
30.925	1736.82	2017.33	1480.4	2096.83	1935.34	1842.48	1543.06	1975.96	2376.85	1571.59	2149.86	1463.25	1398.36	1488.68
31.477	1720.51	1982.92	1542.92	2075.71	1972.99	1731.32	1449.02	1995.19	2391.33	1546.81	2173.26	1438.58	1403.6	1480.88
32.03	1718.21	1932.76	1639.35	2026.09	1945.03	1685.44	1405.76	2003.49	2425.46	1549.65	2152.55	1420.8	1445.39	1549.81
32.582	1664.15	1915.73	1641.04	1965.26	1841.86	1696.67	1370.35	2013.54	2418.04	1555.23	2067.7	1411.86	1482.47	1558.36
33.134	1607.86	1935.43	1625.35	1919.35	1645.74	1663.95	1385.36	1979.88	2356.66	1539.92	2015.29	1435.69	1462.16	1516.62
33.686	1552.61	1964.35	1661.34	1891.54	1571.96	1676.35	1444.57	1919.06	2260.18	1481.03	1983.27	1433.48	1429.52	1499.09
34.239	1484.72	2011.53	1571.31	1835.65	1596.22	1697.87	1518.99	1895.86	2137.5	1422.86	1937.48	1408.43	1406.43	1499.57
34.791	1465.72	2029.98	1518.8	1779.59	1640.94	1668.56	1568.4	1907.15	2051.64	1382.06	1878.98	1406.36	1377.88	1502.56
35.343	1492.91	1993.25	1538.31	1762.73	1682.26	1611.32	1644.38	1908.68	2022.39	1346.4	1882.38	1384.15	1367.9	1477.89
35.895	1552.53	1903.4	1566.63	1767.38	1671.08	1554.18	1715.64	1978.81	2019.03	1343.36	1914.42	1335.2	1379.6	1453.16
36.448	1616.15	1842.63	1564.45	1758.81	1619.61	1575.83	1660.16	2046.43	2020.45	1366.8	1918.8	1321.79	1375.12	1485.3
37	1703.49	1837.99	1636.29	1731.12	1538.27	1559.69	1630.24	2095.11	2037.73	1379.36	1910.18	1335.74	1380.41	1474.08
37.552	1792.48	1813.02	1707.46	1685.32	1543.15	1532.31	1661.29	2120.16	2064.59	1363.75	1902.11	1357.72	1410.58	1447.03
38.104	1837.51	1769.62	1728.41	1670.44	1544.84	1506.22	1652.53	2040.25	2091.5	1340.81	1903.22	1371.09	1423.16	1482.61
38.657	1923.02	1767.07	1705.4	1655.05	1571.94	1443.69	1622.25	1913.81	2114.15	1359.58	1903.08	1360.51	1407.27	1532.34
39.209	1924.4	1837.74	1803.24	1612.65	1564.86	1420.72	1599.35	1829.34	2131.01	1398.64	1912.03	1354.48	1434.56	1581.65
39.761	1786.26	1911.22	1927.67	1604	1581.71	1408.37	1561.8	1825.99	2154.89	1389.41	1926.42	1378.64	1512.01	1652.34
40.313	1670.94	1931.22	1889.19	1598.29	1554.48	1431.74	1515.78	1823.04	2169.63	1370.14	1913.59	1402.74	1567.76	1652.25
40.865	1632.9	1935.74	1795.15	1590.21	1562.19	1436.04	1478.8	1786.72	2148.8	1371.81	1897.27	1383.54	1568.22	1613.72
41.418	1645.66	1958.24	1873.61	1547.69	1616.1	1444.12	1512.3	1713.43	2073.64	1376.16	1892.95	1377.72	1542.18	1553.6
41.97	1625.64	1986.41	1872.69	1487.48	1609.46	1472.03	1570.2	1679.19	1993.02	1396.6	1901.2	1359.4	1502.02	1495
42.522	1603.62	1996.49	1992.85	1442.01	1605.41	1482.76	1615.77	1715.74	1945.76	1406.92	1883.46	1305.6	1459.9	1493.93
43.074	1619.53	1983.53	1942.51	1431.37	1599.1	1496.14	1669.99	1788.84	1906.04	1395.59	1889.96	1272.49	1431.34	1533.34
43.627	1647.66	1940.85	1780.25	1441.5	1585.12	1487.98	1653.08	1848.83	1901.58	1371.93	1926.26	1246.05	1434.54	1530.84
44.179	1624.98	1876.68	1695.79	1454.94	1508.66	1500.01	1654.6	1903.23	1917.53	1342.56	1953.92	1257.36	1455.46	1484.05
44.731	1548.98	1821.21	1646.77	1478.99	1518.82	1498.46	1623.9	1888.96	1920.32	1329.81	1904.15	1273.84	1453.65	1429.23
45.283	1515.71	1787.12	1599.22	1517.1	1461.84	1505.18	1548.84	1819.98	1926.59	1343.59	1805.56	1280.22	1426.66	1417.56
45.836	1506.13	1761.58	1559.2	1527.86	1441.1	1474.1	1462.66	1792.42	1926.08	1350.97	1759.75	1273.74	1361.7	1433.45
46.388	1527.15	1728.85	1516.13	1523.84	1489.72	1490.5	1438.31	1824.28	1919.68	1348.09	1788.87	1262.81	1312.48	1440.75
46.94	1533.34	1690.22	1517.74	1511.57	1502.51	1493.65	1418.6	1846.24	1923.74	1340.62	1803.99	1250.15	1287.22	1451.3
47.492	1545.9	1646.18	1571.53	1543.89	1541	1446.85	1413.65	1824.44	1934.9	1344.47	1834.25	1263.42	1296.45	1445.84
48.045	1508.65	1590.51	1619.49	1572.7	1591.89	1412.38	1439.89	1801.58	1971.34	1381.91	1845.28	1280.52	1299.79	1450.64
48.597	1464.44	1540.16	1631.21	1568.56	1558.66	1419.65	1472.76	1757.97	2033.41	1418.57	1811.12	1305.84	1295.49	1420.9
49.149	1433.6	1497.37	1611.72	1561.96	1466.87	1412.51	1469.97	1728.51	2092.64	1449.29	1739.62	1303.3	1276.18	1402.65
49.701	1404.57	1480.14	1572.3	1583.46	1482.37	1440.63	1490.45	1726.65	2113.07	1463.32	1677.63	1284.75	1243.94	1400
50.253	1397.67	1474.6	1538.28	1638.96	1516.29	1446.52	1529.47	1684.86	2090.64	1484.62	1623.83	1302.02	1190.97	1423.86
50.806	1408.18	1475.82	1499.7	1668.23	1513.37	1435.65	1565.2	1662.41	2054.09	1504.9	1597.79	1321.26	1146.81	1439.21
51.358	1408.54	1498.66	1495.15	1622.08	1558.28	1432.9	1557.18	1707.29	2034.22	1507.01	1574.44	1318.52	1123.5	1426.64
51.91	1381.17	1547.32	1550.65	1566.22	1583.34	1471.22	1499.13	1756.41	2055.59	1491.33	1589.59	1301.62	1120.93	1409.01
52.462	1376.39	1569.49	1529.37	1548.02	1549.28	1550.41	1426.52	1744.44	2047.46	1485.47	1602.06	1274.4	1122.74	1422.89
53.015	1379.65	1567.94	1500.6	1544.88	1608.08	1599.81	1392.97	1721.23	2030.4	1503.23	1589.38	1274.79	1111.2	1396.17
53.567	1383.15	1576.54	1546.6	1482.87	1658.92	1573.52	1372.07	1724.61	2043.37	1543.23	1542.04	1296.61	1110.92	1364.79
54.119	1383.31	1588.71	1610.96	1448.01	1667.05	1543.88	1338.25	1754.87	2045.65	1594.96	1517.47	1285.07	1121.69	1318.5
54.671	1434.23	1590.2	1587.07	1390.22	1627.57	1501.68	1281.6	1765.58	2027.36	1667.64	1498.69	1255.26	1114.04	1273.31
55.224	1521.04	1578.55	1574.44	1364.77	1581.12	1460.09	1249.59	1731.84	2015.72	1712.66	1509.96	1234.52	1078.35	1250.07
55.776	1522.8	1579.2	1516.35	1336.89	1436.08	1427.59	1240.81	1708	2012.38	1705.45	1520.49	1222.63	1055.21	1241.85
56.328	1495.38	1623.09	1522.34	1351.42	1362.73	1405.53	1312.85	1704.38	2005.99	1680.6	1507.8	1224.47	1060.6	1281.24
56.88	1518.1	1670.68	1523.33	1357.58	1311.88	1438.63	1403.24	1693.35	2014.69	1655.04	1505.71	1234.85	1076.24	1342.41
57.433	1504.98	1700.6	1498.62	1354.27	1323.57	1508.2	1454.18	1676.25	2020.32	1625.78	1545.85	1244.47	1086.48	1332.09
57.985	1454.97	1719.01	1458.65	1359.91	1384.14	1530.62	1528.3	1677.34	2009.84	1615.26	1583.83	1259.96	1085.42	1284
58.537	1487.16	1730.41	1416.64	1352.27	1505.56	1503.38	1611.4	1705.77	1997.02	1673.36	1610.34	1249.38	1074.4	1299.21
59.089	1543.3	1739.82	1309.58	1317.43	1531.09	1456.93	1687.81	1734.01	1984.29	1753.48	1665.13	1238.32	1078.32	1279.26
59.641	1587.72	1723.46	1268.65	1271.25	1415.12	1398.2	1767.45	1721.05	1971.53	1771.32	1693.59	1194.45	1113.26	1216.58
60.194	1645.96	1681.43	1272.96	1257.92	1353.99	1366.44	1754.13	1707.52	1989.64	1730.1	1696.16	1167.49	1159.96	1153.26
60.746	1634.92	1612.35	1283.15	1277.42	1362.64	1370.28	1705.86	1755.94	2039.13	1679.69	1692.67	1161.13	1221.41	1120.09
61.298	1568.3	1542.63	1275.71	1334.01	1330.96	1407.37	1732.34	1803.74	2062.88	1668.05	1661.5	1191.06	1301.1	1128.03
61.85	1521.45	1509.58	1292.28	1341.04	1304.23	1463.6	1643.46	1815.32	2078.46	1662.58	1596.7	1260.59	1374.84	1164.48
62.403	1527.7	1503.7	1349.29	1296.43	1376.43	1545.18	1490.04	1810.97	2110.54	1646.3	1551.99	1312.22	1379.69	1168.64
62.955	1552.87	1506.4	1464.17	1267.65	1454.87	1610.18	1359.71	1799.51	2130.63	1602.68	1530.31	1335.03	1333.88	1160.6
63.507	1598.77	1516.21	1533.17	1260.18	1430.31	1627.32	1272.74	1763.94	2138.93	1563.79	1509.02	1330.81	1269.18	1136.15
64.059	1612.19	1525.2	1523.57	1259.9	1376.7	1630.09	1276.11	1733.08	2117.56	1566.36	1464.29	1317.33	1202.31	1116.41
64.612	1617.69	1546.06	1467.88	1251.7	1347.12	1601.37	1322.35	1717.1	2099.39	1611.01	1376.06	1335.99	1148.47	1085.23
65.164	1583.69	1560.3	1440.42	1259.04	1353.54	1581.72	1378.65	1701.97	2117.68	1657.19	1291.39	1332.4	1113.5	1060.61
65.716	1520.03	1543.65	1378.53	1246.36	1352.19	1575.28	1474.22	1720.1	2174.55	1680.86	1225.72	1282.26	1077.47	1075.35
66.268	1521.78	1517.83	1281.5	1246.25	1347.38	1620.89	1624.29	1734.1	2222.28	1683.95	1199.56	1225.51	1032.2	1099.55
66.821	1544.32	1508.31	1230.03	1274.38	1374.14	1607.47	1702.86	1741.1	2206.13	1671.83	1204.62	1197.92	1007.73	1119.92
67.373	1566.83	1510.63	1223.02	1305.6	1387.09	1575.71	1804.1	1701.08	2198.05	1660.04	1228.4	1188.83	1006.77	1160.4
67.925	1538.26	1515.13	1253.44	1323.81	1386.88	1541.54	1782.38	1626.72	2213.72	1645.62	1224.01	1189.58	1025.21	1243.34
68.477	1538.53	1509.15	1253.94	1324.91	1341.48	1483.12	1671.3	1555.01	2206.57	1611.13	1206.28	1172.36	1065.85	1333.15
69.029	1528.04	1510	1258.74	1340.41	1254.32	1436.48	1518.86	1549.23	2179.38	1591.65	1208.2	1138.75	1089.99	1348.38
69.582	1525.69	1532.46	1272.31	1358.58	1247.62	1390.92	1408.2	1546.86	2195.13	1602.14	1211.2	1094.41	1081.58	1280.44
70.134	1526.12	1555.29	1284.81	1328.22	1310.61	1303.16	1364.76	1510.35	2243.15	1600.37	1227.26	1055.53	1081.3	1177.9
70.686	1456.06	1572.08	1286.5	1261.98	1328.45	1265.31	1367.4	1506.49	2277.19	1588.8	1266.01	1059.17	1088.18	1100.75
71.238	1353.61	1603.04	1284.18	1270.6	1310.49	1248.3	1394.76	1552.31	2281.79	1586.49	1299.37	1067.63	1095.28	1079.79
71.791	1308.68	1633.65	1281.43	1328.84	1299.26	1236.05	1465.93	1608.24	2278.3	1586.85	1297.06	1082.53	1117.99	1079.38
72.343	1272.79	1634.24	1268.12	1327.91	1287.28	1223.92	1559.24	1671.16	2286.52	1595.57	1318.01	1100.84	1150.47	1088.76
72.895	1246.04	1587.31	1280.65	1330.8	1347.28	1204.31	1610.63	1734.65	2300.9	1630.2	1313.92	1119.42	1178.79	1115.23
73.447	1236.82	1513.51	1307.68	1349.52	1445.06	1195.92	1599.43	1739.19	2270.88	1629.25	1326.52	1134.22	1212.2	1125.4
74	1216.98	1463.22	1256.05	1385.51	1424.16	1199.3	1542.93	1722.08	2225.54	1582.11	1331.36	1173.95	1220.63	1139.15
74.552	1212.19	1444.84	1229.75	1401.67	1418.87	1256.05	1489.48	1732.58	2230.73	1568.21	1324.87	1215.81	1219.48	1147.87
75.104	1206.46	1432.13	1210.75	1391.24	1386.09	1256.18	1465.31	1771.65	2251.13	1601.02	1327.08	1243.88	1181.63	1143.75
75.656	1213.35	1410.78	1243.2	1411.1	1388.57	1228.69	1515.69	1759.63	2226.99	1656.22	1360.74	1230.58	1121.91	1147.18
76.209	1225.07	1408.47	1276.55	1430.2	1371.87	1242.69	1613.16	1752.77	2200.76	1710.37	1388.96	1214.01	1080.93	1155.23
76.761	1230.01	1444.2	1285.51	1433.7	1339.52	1300.87	1623.4	1728.14	2155.59	1736.93	1362.6	1197.25	1082.38	1199.46
77.313	1240.73	1502.06	1272.6	1418.6	1299.48	1338.78	1496.37	1730.08	2134.24	1765.18	1325.85	1147.73	1083.8	1243.04
77.865	1249.01	1587.66	1239.13	1424.55	1298.57	1371.34	1378.95	1769.81	2188.91	1776.19	1319.35	1128.71	1070.62	1280.24
78.417	1272.29	1674.87	1237.09	1459.51	1355.69	1369.48	1309.55	1766.94	2245.98	1772.52	1305.76	1148.04	1041.03	1323.38
78.97	1297.82	1734.26	1269.44	1446.64	1391.63	1335.61	1263	1774.9	2234.67	1788.04	1300.78	1160.02	1041.28	1371.92
79.522	1300.19	1742.28	1273.01	1449.88	1359.07	1332.25	1271.6	1741.01	2173.55	1786.85	1298.01	1196.74	1054.75	1393.71
80.074	1260.98	1689.23	1297.07	1424.16	1376.12	1310.45	1301.93	1660.88	2149.4	1758.87	1278.25	1231.33	1070.01	1397.38
80.626	1232.9	1615.2	1326.64	1376.75	1382.13	1331.92	1324.82	1610.01	2141.72	1739.71	1259.22	1214.98	1100.61	1423.91
81.179	1249.85	1543.78	1346.9	1344.81	1382.56	1353.38	1323.42	1563.08	2129.08	1727.62	1279.32	1194.24	1132.82	1428.21
81.731	1292.13	1505.74	1356.18	1277.02	1403.42	1370.16	1351.36	1521.92	2126.58	1724.92	1318.3	1130.57	1142.64	1446.89
82.283	1308.77	1515.1	1344.54	1266.35	1371.64	1365.38	1379.19	1502.31	2160.05	1714.37	1328.84	1067.3	1141.16	1465.08
82.835	1307.18	1554.13	1321	1274.04	1328.84	1388.69	1355.65	1492.05	2202.85	1676.18	1298.86	1006.98	1112.06	1467.48
83.388	1321.76	1578.98	1297.08	1301.47	1305.72	1411.87	1302.34	1499.72	2230.89	1634.52	1262.91	978.643	1059.32	1497.19
83.94	1383.28	1558.74	1275.84	1340.37	1366.47	1392.12	1289.93	1542.13	2250.86	1609.74	1217.92	971.016	1007.75	1501.58
84.492	1454.01	1525.04	1228.99	1336.1	1435.02	1383.63	1286.88	1559.41	2270.88	1609.65	1191.76	1012.8	980.445	1421.07
85.044	1433.78	1508.37	1246.63	1349.41	1474.97	1372.78	1280.93	1585.2	2248.53	1621.85	1184	1048.72	951.643	1361.61
85.597	1324.18	1504.11	1271.81	1379.53	1493.85	1325.24	1270.31	1596.36	2210.95	1666.96	1171.82	1083.4	937.363	1362.01
86.149	1268.22	1501.83	1268.52	1347.26	1455.47	1319.73	1270.51	1634.79	2201.1	1718.46	1170.43	1105.53	929.621	1334.87
86.701	1251.36	1490.64	1239.19	1352.59	1462.89	1337.38	1237.5	1661.12	2212.41	1760.07	1196.92	1073.6	932.544	1291.93
87.253	1234.64	1467	1260.16	1380.19	1479.22	1395.98	1185.59	1649.68	2198.64	1775.25	1245.72	1033.98	954.385	1285.35
87.805	1225.15	1449.18	1242.64	1344.65	1471.85	1373.33	1123.79	1639.38	2189.37	1751.57	1265.37	1014.6	977.198	1266.11
88.358	1211.54	1436.78	1260.87	1280.34	1451.3	1344.18	1083.69	1638.75	2194.74	1756.32	1262.88	997.418	1001.23	1226.62
88.91	1216.11	1434.28	1301.16	1257.12	1442.21	1334.87	1086.92	1651.31	2198.51	1814.34	1253.71	981.813	1010.21	1191.06
89.462	1227.43	1449.43	1321.48	1266.69	1402.6	1351.02	1108.49	1685.56	2197.43	1842.33	1259.64	972.044	1008.57	1185.29
90.014	1221.02	1458.19	1310.86	1297.42	1376.57	1360.83	1136.48	1704.84	2195.23	1828.31	1249.63	971.033	1007.78	1178.51
90.567	1217.72	1460.32	1288.25	1354.48	1335.87	1359.86	1164.13	1708.51	2209.8	1764.06	1253.55	956.115	1027.94	1165.89
91.119	1227.15	1450.39	1263.52	1372.71	1298.04	1384.07	1156.24	1675.18	2206.53	1677.09	1248.95	947.802	1053.69	1157.44
91.671	1246.51	1461.28	1245.71	1385.95	1289.26	1408.74	1166.65	1664.71	2161.49	1607.23	1246.29	967.868	1074.66	1171.53
92.223	1249.82	1475.17	1224.87	1388.22	1263.1	1389.28	1145.48	1641.45	2130.71	1581.84	1230.51	996.445	1086.21	1204.11
92.776	1246.29	1464.51	1201.01	1433.31	1235.78	1347.71	1136.82	1587.25	2091.08	1597.82	1190.49	998.082	1069.18	1206.58
93.328	1243.31	1449.72	1189.67	1516.79	1208.15	1305.02	1153.96	1543.44	2086.28	1622.02	1157.32	978.44	1023.4	1186.66
93.88	1265.96	1440.28	1225.06	1567.87	1207.65	1338.64	1161.9	1516.22	2137.25	1654.74	1152.74	975.016	980.56	1167.44
94.432	1294.32	1442.21	1269.92	1560.34	1241.06	1349.52	1139.48	1489.67	2212.22	1700.87	1175.4	995.995	964.665	1162.8
94.985	1275.74	1444.64	1318.35	1553.68	1256.26	1354.74	1093.64	1468.12	2268.08	1726.98	1173.57	1037.39	982.044	1198.19
95.537	1219.5	1451.12	1337.69	1520.19	1261.26	1389.26	1082.43	1493.05	2283.01	1712.47	1160.48	1036.86	1027.49	1215.13
96.089	1225.52	1471.42	1359.35	1463.04	1282.83	1411.12	1112.32	1523.39	2281.31	1657.61	1148.6	1021.25	1065.16	1228.98
96.641	1261.54	1509.57	1342.01	1419.32	1362.3	1418.39	1133.34	1518.24	2274.25	1618.88	1153.91	1008.35	1087.97	1218.66
97.193	1267.03	1542.11	1287.71	1419.51	1386.44	1447.25	1124.09	1504.77	2255.53	1620.18	1161.54	1028.85	1092.94	1163.65
97.746	1272.33	1559.57	1282.38	1476.14	1374.17	1411.02	1127.44	1495.88	2281.74	1634.14	1151.37	1042.66	1061.9	1130.15
98.298	1295.18	1558.13	1289.34	1560.16	1380.86	1362.9	1148.85	1538.3	2350.86	1652.32	1160.44	1057.72	1008.15	1125.01
98.85	1312.33	1547.81	1303.44	1540.58	1475.19	1392.82	1192.84	1569.38	2387.43	1668.2	1196.84	1095.51	980.148	1117.33
99.402	1319.08	1532.68	1304.15	1508.77	1538.58	1397.8	1254.88	1569.17	2355.2	1700.54	1219.65	1137.8	981.956	1141.92
99.955	1299.15	1531.97	1299.72	1485.44	1492.25	1347.63	1295.9	1529.99	2266.92	1740.43	1206.14	1201.9	971.709	1168.64
100.507	1252.16	1535.4	1300.69	1446.47	1448.38	1318.95	1341.14	1493.05	2182.97	1786.21	1174.01	1226.09	946.698	1182.66
101.059	1238.69	1501.51	1314.32	1387.63	1388.19	1339.69	1367.78	1503.52	2148.42	1821.13	1138.15	1218.6	926.747	1192.73
101.611	1255.46	1439.68	1342.94	1329.32	1334.02	1360.35	1348.14	1523.59	2128.78	1845.2	1115.53	1186.78	922.225	1214.5
102.164	1270.82	1417.34	1331.96	1300.7	1280.78	1349.26	1310.6	1540.04	2094.58	1877.56	1094.96	1161.47	942.643	1250.89
102.716	1304.15	1437.2	1312.22	1305	1233.88	1306.69	1316.95	1570	2059.72	1893.71	1090.38	1174.2	978	1206.68
103.268	1359.05	1455.23	1288.44	1342.06	1207.59	1360.03	1363.63	1566.66	2021.08	1935.88	1106.53	1154.18	1012.66	1140.84
103.82	1381.74	1453.23	1284.75	1353.72	1214.68	1367.95	1356.89	1566.82	1993.06	1984.54	1140.01	1122.39	1023.41	1075.56
104.373	1359.15	1454.47	1219.81	1303.42	1246.63	1405.99	1347.35	1597.88	1934.97	1988.05	1163.53	1073.15	1022.24	1057.98
104.925	1351.04	1467.17	1186.58	1267.54	1282.53	1535.51	1300.17	1649.46	1857.86	1970.84	1183.68	1031.21	1031.87	1110.09
105.477	1314.19	1477.48	1177.7	1267.54	1287.37	1564.31	1236.01	1661.16	1805.97	1942.77	1201.21	1018.3	1065.19	1201.56
106.029	1294.74	1471.11	1223.57	1277.45	1321.42	1585.9	1233.41	1649.37	1807.78	1926.72	1191.01	1007.38	1101.38	1279.01
106.582	1281.63	1466.87	1265.81	1264.35	1389.95	1598.54	1278.96	1652.35	1832.47	1920.71	1167.72	991.253	1105.72	1299.24
107.134	1261.71	1474.02	1307.15	1272.32	1358.25	1480.19	1312.16	1652.54	1822.73	1879.94	1146.38	977.632	1099.69	1267.66
107.686	1277.64	1490.44	1299.38	1273.63	1365.3	1447.58	1346.07	1671.95	1793.1	1827.12	1144.28	984.89	1088.1	1253.81
108.238	1308.85	1510.16	1279.07	1218.8	1419.77	1426.42	1390.59	1694.24	1737.26	1802.97	1130.07	994.225	1077.23	1233.26
108.79	1332.82	1531.34	1247.56	1188.15	1399.6	1337.78	1418.72	1684.1	1688.75	1832.31	1113.42	985.786	1083.29	1195.68
109.343	1352.14	1539.59	1230.41	1221.68	1388.01	1223.2	1400.42	1653.68	1674.15	1873.42	1123.65	962.478	1098.57	1144.62
109.895	1345.12	1536.74	1232.74	1208.04	1354.1	1204.65	1344.08	1625.6	1691.29	1897.75	1137.75	951.324	1113.42	1125.59
110.447	1302.6	1538.85	1231.87	1160.48	1356.78	1199.79	1294.64	1576.58	1703.38	1929.98	1157.47	950.357	1148.93	1157.78
110.999	1262.99	1561.09	1210.95	1144.01	1311.44	1178.71	1255.12	1515.24	1706.61	1984.1	1204.09	957.604	1178.42	1202.77
111.552	1270.22	1588.86	1223.19	1162.22	1264.75	1194.84	1220.27	1509.88	1695.7	2014.62	1241.41	950.923	1186.57	1212.15
112.104	1261.44	1596.83	1239.51	1130.65	1292.21	1192.24	1215.06	1507.44	1676.4	2021.79	1265.57	955.423	1183.31	1216.76
112.656	1233.4	1569.08	1259.34	1090.37	1298.55	1212.53	1212.35	1477.87	1649.93	2055.05	1285.21	956.791	1174.25	1218.85
113.208	1264.45	1532.58	1311.04	1069.78	1301.6	1268.76	1224.78	1445.19	1612.43	2072.81	1303.7	952.473	1156.78	1177.56
113.761	1310.1	1533.02	1303.2	1052.38	1332.53	1284.49	1259.42	1411.56	1601.25	2077.68	1302.76	935.978	1125.98	1170.86
114.313	1332.91	1514.3	1308.36	1054.29	1331.8	1295.2	1286.24	1348.71	1614.98	2065.89	1282.01	939.61	1094.04	1188.94
114.865	1326.59	1476.79	1338.2	1065.15	1270.75	1325.9	1299.05	1293.37	1623.22	2033.29	1260.54	948.385	1060.96	1179.7
115.417	1321.55	1463.38	1346.01	1053.53	1266.45	1366.7	1326.06	1291.77	1622.37	2003.03	1247.44	963.412	1037.52	1154.45
115.97	1321.65	1476.49	1318.31	1018.74	1270.56	1387.72	1360.05	1322.24	1604.37	1988.09	1261.45	1003.04	1012	1154.21
116.522	1319.84	1489.47	1256.24	1000.88	1271.55	1363.01	1389.54	1372.52	1584.65	1969.18	1299.49	1052.02	989.643	1152.12
117.074	1279.04	1476.41	1247.8	1008.21	1300.69	1307.3	1406.2	1420.48	1574.71	1931.87	1324.1	1093.03	988.324	1133.03
117.626	1228.53	1456.39	1245.87	1022.63	1278.45	1249.31	1416.03	1506.79	1590.83	1919.76	1315.32	1103.05	1002.37	1098.55
118.178	1174.62	1456.31	1267.96	1032.81	1299.83	1227.22	1415.4	1552.63	1594.35	1925.65	1285.27	1078.21	1018.1	1079.33
118.731	1154.02	1464.09	1298.47	1069.78	1308	1240.28	1427.16	1604.84	1589.42	1897.79	1270.1	1063.16	1021.25	1100.78
119.283	1175.56	1471.68	1319.06	1104.83	1289.91	1259.04	1422.98	1656.04	1615.57	1881.2	1268.9	1066.69	1015.19	1115.92
119.835	1204.32	1461.6	1284.61	1108.16	1271.39	1282.44	1354.04	1657.46	1663.8	1891.56	1279.99	1067.28	1027.74	1135.26
120.387	1227.3	1451.15	1249.44	1103.99	1242.04	1260.95	1308.47	1587.49	1706.43	1911.29	1313.54	1075.9	1074.9	1189.83
120.94	1274.5	1422.54	1174.64	1102.55	1222.4	1241.93	1300.89	1500.07	1732.14	1890.16	1310.57	1081.3	1096.63	1249.97
121.492	1292.64	1405.97	1138.87	1119.55	1161.71	1273.72	1337.73	1460.28	1728.09	1868.54	1307.35	1102.87	1075.13	1261.17
122.044	1285.35	1401.88	1147.07	1092.39	1153.65	1349.8	1358.47	1454.09	1727.46	1868.14	1310.82	1120.74	1040.58	1257.76
122.596	1247.57	1403.82	1186.32	1069.19	1239.75	1418.61	1338.34	1472.83	1731.68	1867.08	1302.47	1103.33	1017.24	1268.01
123.149	1210.52	1424.09	1204.31	1058.54	1287.74	1411.63	1305.61	1523.77	1731.78	1880.53	1298.56	1088.89	996.967	1278.98
123.701	1191.43	1455.46	1199.18	1085.68	1259.07	1375.01	1301.1	1578.9	1722.01	1914.62	1274.29	1075.42	978.967	1239.82
124.253	1208.65	1476.08	1202.83	1116.65	1196.22	1342.66	1322.52	1589.49	1707.1	1987.76	1239.87	1065.45	950.143	1183.52
124.805	1259.75	1479.76	1189.32	1137.24	1218.9	1308.34	1315.48	1582.09	1687.24	2079.25	1192.69	1041.46	936.863	1171.79
125.358	1260.05	1446.54	1157.94	1153.35	1279.98	1333.07	1314.03	1582.87	1659.43	2154.39	1142.93	1032.21	926.11	1205.31
125.91	1209.26	1433.75	1117.49	1144.98	1297.01	1358.82	1289.84	1618.28	1639.87	2206.75	1100.88	1029.65	903.44	1232.37
126.462	1177.98	1433.89	1132.91	1126.27	1241.66	1386.85	1298.19	1681.84	1644.74	2218.27	1079.25	1008	869.714	1241.34
127.014	1166.77	1435.13	1142.9	1109.94	1243.89	1374.66	1321.13	1716.73	1668.71	2189.19	1106.16	959.209	840.324	1250
127.566	1165.41	1433.39	1137.32	1082.18	1252.85	1393.29	1329.87	1691.1	1701.86	2128.68	1158.08	909.385	829.385	1278.62
128.119	1174.21	1418.22	1136.74	1057.76	1249.63	1386.21	1354.88	1645.96	1716.01	2087.72	1194.59	885.022	844.308	1286.68
128.671	1201.85	1387.23	1115.59	1051.2	1223.52	1344.82	1392.66	1583.07	1715.62	2049.51	1218.21	883.742	852.121	1284.86
129.223	1233.02	1359.69	1128.21	1046.34	1203.68	1332.59	1453.97	1544.44	1712.52	1985.69	1223.53	908.648	840.918	1305.35
129.775	1239.69	1376.24	1185.18	1068.81	1174.34	1344.66	1436.31	1531.75	1670.06	1950.82	1217.03	921.555	818.67	1336.66
130.328	1243.21	1447.71	1236.54	1097.71	1128.07	1348.79	1384.66	1505.67	1633.09	1966.97	1207.57	901.588	816.912	1335.7
130.88	1249.58	1536.54	1272.54	1089.08	1132	1359.09	1364.23	1506.25	1646.15	1995.91	1200.35	887.291	823.824	1279.04
131.432	1264.91	1574.96	1257.32	1092.57	1135.78	1333.23	1368.54	1528.49	1671.3	1979.21	1192.01	884.033	820.423	1217.49
131.984	1249.94	1573.41	1266.46	1101.18	1122.13	1310.9	1364.59	1499.95	1717.07	1912.1	1196.8	895.659	809.088	1189.16
132.537	1244.95	1543.83	1290.66	1088.78	1107.96	1309.4	1344.84	1495.86	1744.12	1834.78	1233.58	893.027	821.154	1198.91
133.089	1223.55	1486.37	1270.97	1089.46	1072.48	1274.78	1300.97	1543.72	1753.44	1789.18	1248.54	889.027	844.352	1220.67
133.641	1187.52	1435.6	1221.35	1097.52	1079.6	1290.99	1271.5	1562.99	1753.68	1756.23	1238.68	899.61	868.396	1240.85
134.193	1173.85	1422.2	1232.06	1105.16	1085.51	1339.4	1259.06	1600.61	1746.22	1711.45	1239.82	905.824	900.077	1233.08
134.746	1201.97	1448.94	1249.88	1111.9	1132.89	1315.85	1227.94	1629.42	1734.62	1672.92	1250.35	912.346	942.901	1276.45
135.298	1254.77	1490.53	1224.37	1147.12	1160.57	1303.41	1185.37	1631.21	1702.53	1638.15	1211.88	924.802	1000.16	1321.58
135.85	1287.13	1529.41	1212.35	1176.49	1196.67	1320.43	1184.46	1657.45	1665.48	1650.57	1168.76	923.731	1036.36	1343.03
136.402	1292.75	1531.68	1202.44	1156.2	1209.87	1335.54	1215.69	1641.11	1613.08	1708.5	1139.15	918.626	1018.98	1387.31
136.954	1291.69	1508.49	1202.98	1119.85	1202.8	1311.58	1248.09	1564.24	1574.84	1775.41	1120.9	912.236	1029.93	1363.42
137.507	1306.76	1492.41	1221.16	1121.12	1205.89	1290.18	1280.23	1498.03	1572.88	1851.56	1105.54	897.099	1091.78	1262.22
138.059	1316.71	1495.85	1278.81	1137.23	1218.47	1305.21	1326.39	1438.29	1588.64	1946.23	1072.86	897.313	1161.59	1190.94
138.611	1320.43	1507.19	1328.86	1149.89	1202.43	1275.06	1365.46	1402.84	1629.91	2012.24	1067.39	910.269	1253.12	1183.9
139.163	1326	1518.56	1333.2	1145.18	1186.95	1225.19	1336.91	1401.35	1687.94	2028.47	1062.59	931.33	1309.52	1201.53
139.716	1358.09	1538.71	1298.95	1106.03	1185.44	1213.72	1283.11	1409.97	1739.65	1973.74	1092.36	932.874	1253.42	1225.85
140.268	1359.07	1558.87	1229.07	1060.12	1210.98	1205.9	1229.29	1381.37	1762.79	1893.45	1112.75	915.912	1148.94	1284.14
140.82	1327.74	1551.57	1201.32	1035.08	1259.42	1182.33	1204.61	1370.65	1781.41	1820.81	1132.97	902.231	1063.9	1299.79
141.372	1265.29	1526.61	1208.55	1032.07	1259.16	1178.85	1190.44	1413.84	1795.15	1772.68	1140.56	898.753	1016.91	1313.47
141.925	1209.94	1512.97	1217.64	1028.08	1247	1176.03	1177.75	1495.24	1815.8	1752.51	1163.84	923.544	1033.71	1325.7
142.477	1209.02	1506.53	1226.87	1049.74	1269.05	1185.54	1184.49	1552.25	1842.94	1760.01	1168.76	937.319	1047.4	1340.2
143.029	1226.21	1489.53	1271.09	1081.01	1220.92	1233.36	1227.06	1594.96	1854.15	1782.37	1161.51	937.863	1054.98	1313.86
143.581	1242.11	1456.03	1293.99	1060.21	1186.85	1310.08	1277.26	1645.68	1845.33	1822.38	1144.49	940.231	1046.9	1237.29
144.134	1266.25	1419.01	1253.31	1053.9	1196.66	1366.33	1335.66	1675.74	1834.17	1900.07	1130.15	956.527	1023.27	1219.66
144.686	1269.6	1400.26	1228.11	1075.62	1233.34	1331.38	1359.44	1641.81	1827.71	2039.71	1120.31	979.538	1002.21	1294.56
145.238	1209.62	1396.75	1191.06	1133.81	1268.62	1263.9	1339.74	1578.58	1772.65	2152.05	1110.54	976.962	981.808	1395.14
145.79	1157.92	1400.46	1174.55	1201.66	1241.89	1238.76	1304.03	1514.57	1652.69	2146.83	1105.72	949.544	958.203	1459.21
146.342	1135.31	1405.43	1184.25	1249.63	1280.51	1231.76	1252.16	1466.61	1553.37	2084.87	1124.47	936.659	946.846	1516.33
146.895	1122.61	1399.55	1231.91	1326.64	1317.5	1252.11	1209.82	1465.84	1492.92	1994.01	1161.91	945.758	962.511	1536.12
147.447	1144.3	1379.81	1259.28	1385.41	1355.71	1300.25	1193.53	1471.79	1471.7	1940.95	1207.63	953.94	1005.71	1513.43
147.999	1189.86	1363.96	1251.49	1434.65	1356.52	1363.9	1196.81	1505.53	1472.09	1930.61	1223.93	940.857	1045	1510.02
148.551	1215.56	1359.9	1259.96	1438.2	1320.75	1434.58	1203.65	1575.41	1486.54	1943.89	1222.67	919.615	1052.79	1502.1
149.104	1211.53	1359.18	1254.24	1382.17	1301.71	1458.42	1184.83	1558.71	1497.09	1966.38	1213.46	927.978	1050.28	1475.99
149.656	1192.66	1363.12	1231.28	1353.68	1246.6	1413.77	1195.27	1535.69	1526.97	1976.62	1168.12	980.511	1052.54	1479.64
150.208	1197.49	1365.56	1211.67	1328.34	1227.87	1416.96	1207.76	1495.76	1540.18	1971.86	1108.46	1014.7	1052.19	1477.45
150.76	1212.76	1349.18	1199.86	1275.85	1226	1483.95	1208.04	1459.92	1541.34	1961.71	1046.32	1042.99	1069.92	1426.29
151.313	1232.02	1331.58	1220.37	1225.24	1194.77	1534.5	1217.96	1475.44	1547.83	1953.7	1033.38	1057.86	1071.71	1393.07
151.865	1265.33	1324.34	1233.76	1226.72	1136.4	1555.45	1223.07	1502.24	1577.91	1966.26	1040.92	1040.43	1085.47	1363.77
152.417	1286.13	1331.43	1254.96	1255.33	1110.99	1603.28	1190.93	1515.03	1629.25	1978.24	1069.32	995.989	1084.86	1325.2
152.969	1286.27	1361.8	1256.51	1279.56	1103.59	1545.6	1158.6	1524.52	1588.37	1977.71	1122.18	936.681	1066.87	1283.96
153.522	1269.41	1389.12	1246.41	1234.35	1081.81	1486.38	1150.65	1519.06	1518.13	1960.45	1153.2	886.824	1059.55	1286.82
154.074	1303.77	1409.72	1219.52	1201.83	1066.28	1461.84	1152.64	1531.44	1486.37	1964.3	1118.71	836.67	1036.57	1359.92
154.626	1360.26	1435.81	1182.79	1159.05	1054.58	1531.63	1172.62	1571.53	1476.12	2017.18	1032.4	813.401	966.011	1427.42
155.178	1368.99	1452.17	1146.87	1132.01	1055.03	1531.67	1209.66	1596.27	1489.02	2084.79	981.495	813.077	908.863	1433.14
155.73	1331.74	1452.33	1152.21	1141.18	1068.21	1462.92	1232.59	1589.03	1498.76	2173.26	965.978	805.681	885.632	1506.67
156.283	1278.69	1444.75	1162.55	1132.61	1101.16	1383.43	1272.26	1576.64	1522.46	2257.28	965.159	799.698	874.154	1581.44
156.835	1208.38	1417.85	1198.97	1135.28	1108.14	1334.87	1298.56	1566.32	1574.79	2291.2	984.115	799.896	870.731	1506.93
157.387	1171.16	1410.45	1210.71	1202.78	1167.84	1298.45	1315.48	1550.27	1665.11	2314.74	988.61	800.308	871.654	1387.15
157.939	1171.94	1423.45	1196.1	1247.82	1268.68	1221.47	1323.02	1559.9	1745.03	2292.13	984.846	797.973	900.626	1319.52
158.492	1165.38	1422.96	1199.21	1268.71	1318.51	1138.91	1349.29	1603.85	1781.98	2280.29	978.516	808.555	922.984	1295.84
159.044	1152.91	1409.22	1234.84	1258.74	1298.86	1116.57	1375.93	1630.88	1756.69	2251.19	997.967	815.835	924.758	1295.81
159.596	1146.92	1417.43	1216.37	1176.17	1287.8	1163.79	1385.52	1593.79	1706.27	2166.67	1027.56	848.978	907.951	1308.92
160.148	1167.21	1450.78	1221.1	1084.75	1291.64	1195.57	1395.14	1576.54	1688.68	2077.66	1060.84	874.775	898.846	1299.03
160.701	1184.23	1479.89	1235.63	1027.62	1274.91	1180.67	1378.32	1571.81	1704.64	2023.03	1091.84	880.478	884.071	1279.69
161.253	1189.33	1461.99	1183.8	1003.94	1301.64	1188.86	1339.36	1550.42	1713.51	1922.36	1075.43	895.187	882.423	1290.28
161.805	1178.24	1412.18	1194.44	1019.29	1346.26	1173.8	1296.79	1527.25	1696.61	1828.88	1048.38	931.533	909.588	1318.14
162.357	1171.22	1362.32	1265.99	1015.26	1336.31	1197.97	1251.59	1524.68	1663.51	1795.35	1044.53	942.055	947.791	1357.36
162.91	1182.44	1332.97	1288.12	1021.17	1325.36	1324.06	1222.81	1519.79	1633.4	1819.93	1062.54	901.846	963.368	1426.41
163.462	1180.61	1320.75	1269.07	1037.42	1264.65	1366.99	1199.32	1502.6	1621.25	1866.7	1065.66	854.67	966.385	1468.73
164.014	1174.83	1305.05	1251.27	1069.07	1208.89	1383.47	1176.19	1478.98	1593.07	1888.73	1054.2	837.253	948.978	1468.06
164.566	1185.03	1293.26	1248.01	1104.59	1180.29	1402.89	1162.98	1481.67	1559.4	1842.29	1041.52	840.89	921.538	1369.37
165.118	1193.03	1290.37	1248.07	1106.08	1166.21	1399.28	1167.54	1492.6	1539.18	1747.44	1070.32	852.962	895.868	1255.2
165.671	1200.22	1273.86	1237.16	1059.74	1185.63	1354.81	1152.41	1492.75	1538	1677.77	1105.8	852.209	878.929	1199.08
166.223	1199.1	1249.57	1205.99	1043.62	1182.46	1287.8	1126.79	1460.16	1494.47	1655.3	1101.26	836.841	873.33	1203.34
166.775	1221.06	1230.75	1194.25	1078.65	1139.97	1234.03	1137.04	1411.71	1420.21	1658.96	1095.51	857.786	875.126	1236.54
167.327	1255.26	1213.15	1210.72	1092.34	1098.08	1234.58	1136.25	1347.47	1382.76	1675.89	1120.57	904.923	884.918	1282.36
167.88	1309.99	1183.52	1182.12	1103.7	1090.68	1223.34	1135.12	1307.7	1385.24	1683.72	1173.96	920.099	891.269	1363.14
168.432	1340.76	1174.08	1177.31	1137.28	1107.7	1186.74	1152.68	1300.81	1398.87	1662.24	1205.99	912.352	895.549	1444.36
168.984	1354.16	1196.46	1170.42	1199.46	1145.78	1168.4	1170.22	1275.81	1412.34	1655.79	1242.08	928.516	896.374	1472.86
169.536	1323.85	1222.68	1207.49	1255.3	1192.68	1180.43	1158.67	1258.11	1416.75	1686.88	1276.55	965.038	880.747	1428.91
170.089	1250.45	1217.58	1228.98	1257.93	1289.91	1189.18	1140.9	1273.18	1444.86	1749.16	1320.87	980.511	847.346	1406.66
170.641	1178.7	1188.85	1260.88	1204.3	1395.01	1229.75	1148.42	1320.8	1458.91	1843.08	1324.36	1003.27	814.907	1393.19
171.193	1143.34	1177.47	1239.37	1154.62	1438.22	1237.31	1175.06	1372.98	1441.2	1922.93	1272.63	1050.63	806.187	1406.21
171.745	1128.38	1171.1	1232.07	1155.93	1416.54	1248.72	1217.85	1413.03	1394.99	1955.64	1209.86	1059.45	820.203	1374.54
172.298	1122.7	1160.49	1225.28	1159.08	1381.17	1245.35	1243	1456.07	1367.43	1946.58	1169.92	1067.76	842.511	1303.34
172.85	1131.19	1145.42	1198.38	1125.94	1311.14	1240.68	1221.28	1491.87	1377.25	1911.97	1139.66	1030.49	853.319	1257.27
173.402	1156.69	1135.12	1166.1	1106.24	1276.21	1210.07	1165.1	1505.04	1408.87	1852.46	1114.31	960.473	852.775	1240.85
173.954	1188.69	1139.22	1160.97	1100.69	1286.66	1198.74	1121.84	1499.93	1438.33	1791.77	1114.95	915.357	857.44	1238.54
174.507	1210.32	1143.98	1172.91	1086.35	1288.41	1219.79	1096.93	1503.06	1451.34	1732.93	1138.91	895.462	890.429	1254.59
175.059	1209.37	1161.3	1184.41	1080.84	1264.64	1242.32	1107.13	1481.28	1421.59	1694.73	1151.8	878.791	931.769	1282.81
175.611	1197.66	1174.82	1209.25	1088.58	1230.82	1251.58	1138.17	1447.63	1395.38	1660.91	1158.91	870.879	966.857	1340.79
176.163	1202.8	1175.25	1214.52	1108.08	1188.31	1238.55	1151.62	1406.96	1403.28	1593.45	1189.54	901.44	962.626	1385.52
176.715	1225.03	1181.48	1169.29	1164.34	1144.44	1222.5	1157.65	1367.63	1438.15	1505.37	1194.66	939.566	917.313	1374.6
177.268	1254.72	1204.15	1129.14	1216.08	1143.03	1239.03	1160.67	1328.91	1506.85	1459.72	1166.33	962.577	870.604	1327.59
177.82	1245.04	1241.71	1098.44	1210.9	1126.3	1241.73	1182.44	1293.73	1564.33	1493.92	1182.25	958.335	843.511	1277.03
178.372	1243.8	1274.01	1084.95	1161.8	1099.46	1264.41	1200.58	1285.5	1573.52	1575.1	1191.42	947.209	827.956	1278.34
178.924	1242.35	1265.27	1098.57	1155.71	1101.01	1273.57	1203.44	1315.85	1544.16	1661.7	1157.07	936.297	830.67	1259.63
179.477	1238.07	1248.54	1079.76	1137.56	1102.45	1310.39	1177.59	1350.01	1489.31	1738.54	1145.26	883.874	863.313	1253.56
180.029	1238.44	1245.95	1069.29	1117.41	1100.91	1326.37	1150.84	1384.37	1428.88	1762.41	1128.23	832.445	906.841	1254.75
180.581	1234.98	1256.09	1101.82	1103.03	1086.37	1278.36	1139.34	1398.01	1385.93	1694.61	1107.9	799.538	937.066	1256.3
181.133	1204.82	1267.06	1133.85	1103.43	1091.85	1229.88	1135.6	1383.66	1359.18	1594.05	1092.01	763.225	957.033	1249.44
181.686	1185.96	1279.25	1120.1	1131.69	1104.3	1233.53	1135.66	1379.57	1350.15	1540.49	1044.32	748.94	961.637	1272.88
182.238	1183.37	1293.58	1065.08	1138.36	1093.9	1250.35	1140.12	1375.9	1386.42	1528	1021.05	745.06	975.33	1335.12
182.79	1152.16	1304.81	1034.45	1155.83	1050.97	1251.08	1134.38	1382.36	1444.75	1551.31	1022.58	734.813	1002.32	1358.33
183.342	1122.33	1303.56	1019.06	1163.41	1022.35	1265.28	1107.87	1384.79	1481.02	1553.79	1054.05	747.599	1038.01	1363.99
183.895	1111.29	1276.56	1045.76	1161.44	1051.58	1254.56	1116.09	1384.09	1506.02	1529.63	1053.6	775.198	1072.61	1376.98
184.447	1121.42	1273.57	1048.88	1108.63	1054.62	1240.44	1143.41	1395.52	1532.56	1530.57	994.764	805.626	1103.47	1363.36
184.999	1138.81	1295.83	1046.87	1058.97	1048.76	1196.43	1137.13	1386.12	1519.35	1536.8	970.33	880.473	1120.68	1327.34
185.551	1132.98	1333.91	1079.45	1047.43	1027	1145.64	1087.41	1378.78	1483.98	1517.28	955.313	969.802	1136.52	1258.09
186.103	1104.46	1375.88	1083.6	1063.58	1030.92	1132.65	1060.29	1408.75	1471.15	1480.72	948.198	984.456	1153.91	1240.79
186.656	1100.33	1399.27	1054.26	1075.67	1045.22	1150.52	1071.17	1396.79	1465.46	1443.4	953.027	954.165	1146.41	1257.88
187.208	1113.35	1393.79	1039.54	1099.18	1069.87	1209.85	1090.99	1372.75	1445.2	1422.66	958.659	932.082	1114.47	1277.49
187.76	1121.44	1370.55	1050.37	1135.79	1061.51	1258.06	1084.66	1369.92	1417.94	1398.67	982.137	890.549	1108.31	1281.09
188.312	1113.61	1348.34	1047.07	1142.4	1050.13	1312.44	1066.44	1367.7	1393.75	1368.28	1032.94	836.478	1128.58	1283.9
188.865	1101.6	1329.29	1042.1	1128.72	1071.99	1299.1	1040.29	1442.06	1372.28	1357.22	1096.25	794.22	1132.1	1268.15
189.417	1081.36	1287.62	1039.11	1121.89	1115.02	1208.83	1017.77	1509.49	1353.17	1352.14	1172.25	755.137	1111.48	1232.64
189.969	1075.29	1235.31	1067.37	1102.68	1183.99	1156.3	1008.33	1434.88	1348.03	1338.55	1235.97	751.214	1079.02	1198.46
190.521	1076.21	1197.62	1096.04	1116.46	1203.84	1148.34	1028.29	1310.45	1362.4	1298.68	1259.08	791.022	1050.92	1161.46
191.074	1062.28	1184.7	1121.48	1130.22	1159.4	1171.76	1067.41	1245.89	1378.7	1268.7	1219.48	815.22	1041.42	1153.71
191.626	1063.08	1197.32	1120.48	1127.31	1142.53	1196.6	1117.55	1220.94	1374	1252.08	1125.67	814.94	1035.58	1165.55
192.178	1092.73	1215.47	1140.23	1101.08	1122.54	1193.23	1143.03	1222.21	1374.88	1252.93	1051.41	796.319	1004.13	1205.72
192.73	1123.34	1235.04	1156.84	1071.05	1111.04	1165.53	1140.37	1277.22	1384.47	1283.48	1006.52	791.841	978.467	1261.08
193.283	1167.38	1239.12	1178.19	1050.54	1130.48	1131.7	1135.82	1296.54	1378.7	1297.51	1003.23	793.72	971.115	1272.06
193.835	1210.44	1224.54	1146.18	1020.95	1175.88	1126.75	1113.25	1293.3	1357.7	1319.84	999.868	806.154	995.538	1254.08
194.387	1224.48	1212.3	1067.62	998.78	1201.89	1114.79	1103.91	1294.96	1328.44	1334.35	1000.65	822.368	1014.36	1225.42
194.939	1175.86	1205.98	1008.75	1035.6	1196.14	1125.82	1096.01	1280.95	1289.74	1349.13	1010.35	821.027	994.967	1224.84
195.491	1129.54	1189.94	1000.53	1076.6	1166.18	1138.58	1080.39	1289.16	1250.71	1381.93	1022.7	819.104	955.901	1219.02
196.044	1086.43	1181.92	991.582	1088.76	1130.98	1195.7	1064.47	1309.1	1216.7	1410.69	1033.64	819.088	903.852	1197.42
196.596	1064.35	1199.36	996.923	1069.77	1094.19	1233.53	1038.98	1314.67	1188.8	1467.04	1055.38	820.835	857.962	1179.13
197.148	1059.38	1227.63	981.61	1056.68	1084.56	1252.34	1023.85	1307.67	1186.45	1525.29	1058.97	812.308	817.709	1184.29
197.7	1050.16	1250.4	982.319	1033.03	1083.23	1290.01	1017.77	1315.85	1215.54	1568.12	1064.63	796.132	800.692	1205.09
198.253	1056.07	1270.52	1027.14	1004.37	1074.16	1291.08	1018.34	1367.38	1276.78	1552.23	1093.85	784.412	789.648	1222.99
198.805	1075.99	1291.74	1072.44	1004.54	1074.97	1237.14	1042.85	1408.73	1348.75	1518.24	1145.14	773.967	803.874	1239.12
199.357	1089.99	1308.16	1103.61	998.044	1071.68	1176.96	1067.42	1425.21	1392.28	1479.2	1140.8	779.621	826.401	1258.72

## Sheet: Figure 3J
Figure 3J: Ratio of glial distribution / total midline length in Dcckanga mice
E14 wildtype NESTIN+ glia	E14 Dcckanga/kanga NESTIN+ glia	E15 wildtype NESTIN+ glia	E15 Dcckanga/kanga NESTIN+ glia	E16 wildtype NESTIN+ glia	E16 Dcckanga/kanga NESTIN+ glia	E14 wildtype GLAST+ glia	E14 Dcckanga/kanga GLAST+ glia	E15 wildtype GLAST+ glia	E15 Dcckanga/kanga GLAST+ glia	E16 wildtype GLAST+ glia	E16 Dcckanga/kanga GLAST+ glia
0.265128	0.236225	0.261727	0.242472	0.312941	0.312223	0.241293	0.194718	0.27419	0.258791	0.325585	0.299847
0.2767	0.207438	0.322453	0.233002	0.307606	0.311372	0.266603	0.190364	0.334013	0.233002	0.337612	0.324263
0.286288	0.22524	0.263096	0.253514	0.329129	0.301727	0.270736	0.19528	0.263096	0.240722	0.316396	0.301727
0.286337	0.22668	0.31459	0.2448	0.325204	0.277105	0.28254	0.239559	0.323408	0.219433	0.331078	0.261821
0.246403	0.205145	0.29605	0.249967	0.344108	0.30824	0.246025	0.230449	0.317212	0.230437	0.383066	0.332477
0.248795	0.241264	0.299889	0.275058	0.319381	0.335213	0.246721	0.259125	0.317821	0.275058	0.31018	0.361659
		0.288916	0.24864	0.325013				0.288916	0.237469	0.325013
		0.263986						0.275453
