# Supplementary material for: DCC regulates astroglial development essential for telencephalic morphogenesis and corpus callosum formation
Source: eLife. 2021 Apr 19;10:e61769. doi: 10.7554/eLife.61769 (PMC8116049; doi:10.7554/eLife.61769)
Supplement: Figure 4—figure supplement 1—source data 1. [file elife-61769-fig4-figsupp1-data1.xlsx]

## Sheet: Figure 4-S4C
Figure S4C: EdU+/Ki67+ MZG in Dcckanga mice following 24 hour EdU pulse.
E12-E13 wildtype	E12-E13 Dcckanga/kanga	E13-E14 wildtype	E13-E14 Dcckanga/kanga	E14-E15 wildtype	E14-E15 Dcckanga/kanga
63	89	95	59	92	87
49	57	56	52	91	105
90	86	38	63	70	111
42	75	69	78	98	96
50	57	47	69	94	107
64	60	40	83	80	82
61			83	76	86
			77		109

## Sheet: Figure 4-S4D
Figure S4D: EdU+/Ki67- MZG in Dcckanga mice following 24 hour EdU pulse.
E12-E13 wildtype	E12-E13 Dcckanga/kanga	E13-E14 wildtype	E13-E14 Dcckanga/kanga	E14-E15 wildtype	E14-E15 Dcckanga/kanga
148	205	137	147	129	120
194	196	197	171	151	135
233	190	165	98	128	168
159	187	153	126	146	131
186	196	238	154	123	156
205	216	159	156	119	129
209			157	158	121
			152		138

## Sheet: Figure 4-S4F
Figure S4F: Cleaved-caspase3 cells within the telencephalic hinge in Dcckanga mice.
E13 wildtype	E13 Dcckanga/kanga	E14 wildtype	E14 Dcckanga/kanga	E15 wildtype	E15 Dcckanga/kanga
6	5	4	2	3	3
3	9	3	2	3	6
1	0	3	1	3	4
2	3	2	2	8	2
24		4	2	6	2
		2	1	6	3
		0	1	0	2
				5	10

## Sheet: Figure 4-S4I
Figure S4I: Quantification of SOX9-positive Indusium griseum glia cell bodies at the pial surface of the IHF in E16 Dcckanga mice.
Wildtype	Dcckanga/kanga
96	15
104	14
127	1
105	17
95	13
158
