# Supplementary material for: DCC regulates astroglial development essential for telencephalic morphogenesis and corpus callosum formation
Source: eLife. 2021 Apr 19;10:e61769. doi: 10.7554/eLife.61769 (PMC8116049; doi:10.7554/eLife.61769)
Supplement: Figure 4—source data 1. [file elife-61769-fig4-data1.xlsx]

## Sheet: Figure 4B
Figure 4B: SOX9+ MZG cell body distribution along the IHF in E14 Dcckanga mice
Distance bins (micron)	Wildtype SOX9+ MZG n1	Wildtype SOX9+ MZG n2	Wildtype SOX9+ MZG n3	Wildtype SOX9+ MZG n4	Wildtype SOX9+ MZG n5	Wildtype SOX9+ MZG n6	Wildtype SOX9+ MZG n7	Wildtype SOX9+ MZG n8	Wildtype SOX9+ MZG n9	Wildtype SOX9+ MZG n10	Wildtype SOX9+ MZG n11	Wildtype SOX9+ MZG n12	Dcckanga/kanga SOX9+ MZG n1	Dcckanga/kanga SOX9+ MZG n2	Dcckanga/kanga SOX9+ MZG n3	Dcckanga/kanga SOX9+ MZG n4	Dcckanga/kanga SOX9+ MZG n5	Dcckanga/kanga SOX9+ MZG n6	Dcckanga/kanga SOX9+ MZG n7	Dcckanga/kanga SOX9+ MZG n8
0-50	15	23	21	20	28	12	14	22	20	22	22	17	11	18	19	25	20	29	16	20
50-100	13	17	15	16	19	11	18	12	14	18	17	14	10	9	20	20	11	16	8	10
100-150	10	9	13	16	16	15	8	11	22	7	19	13	11	17	10	9	10	17	8	9
150-200	11	10	11	16	12	13	11	5	16	1	19	9	13	22	10	21	6	10	6	2
200-250	19	8	9	7	9	7	6	9	7	0	23	7	3	14	18	22	5	5	4	8
250-300

## Sheet: Figure 4D
Figure 4D: SOX9+ MZG cell body distribution along the IHF in E15 Dcckanga mice
Distance bins (micron)	Wildtype SOX9+ MZG n1	Wildtype SOX9+ MZG n2	Wildtype SOX9+ MZG n3	Wildtype SOX9+ MZG n4	Wildtype SOX9+ MZG n5	Wildtype SOX9+ MZG n6	Wildtype SOX9+ MZG n7	Wildtype SOX9+ MZG n8	Wildtype SOX9+ MZG n9	Dcckanga/kanga SOX9+ MZG n1	Dcckanga/kanga SOX9+ MZG n2	Dcckanga/kanga SOX9+ MZG n3	Dcckanga/kanga SOX9+ MZG n4	Dcckanga/kanga SOX9+ MZG n5	Dcckanga/kanga SOX9+ MZG n6	Dcckanga/kanga SOX9+ MZG n7	Dcckanga/kanga SOX9+ MZG n8
0-50	27	20	27	20	17	18	20	26	18	23	17	23	14	23	19	17	14	12	23	28
50-100	18	19	13	23	25	15	21	24	17	19	21	24	22	24	22	23	16	15	18	24
100-150	19	18	17	15	13	20	15	20	15	26	22	25	12	14	19	11	15	3	9	5
150-200	14	12	27	13	16	10	16	18	12	18	10	21	12	20	17	10	8	3	3	4
200-250	17	9	22	8	19	2	18	20	10	10	3	14	4	11	8	7	5	0	1	4
250-300	9	1	9	4	13	3	3	1	4	4	2	6	3	0	4	6	2	0	0	0

## Sheet: Figure 4F
Figure 4F: SOX9+ MZG cell body distribution along the IHF in E16 Dcckanga mice
Distance bins (micron)	Wildtype SOX9+ MZG n1	Wildtype SOX9+ MZG n2	Wildtype SOX9+ MZG n3	Wildtype SOX9+ MZG n4	Wildtype SOX9+ MZG n5	Wildtype SOX9+ MZG n6	Wildtype SOX9+ MZG n7	Dcckanga/kanga SOX9+ MZG n1	Dcckanga/kanga SOX9+ MZG n2	Dcckanga/kanga SOX9+ MZG n3	Dcckanga/kanga SOX9+ MZG n4	Dcckanga/kanga SOX9+ MZG n5	Dcckanga/kanga SOX9+ MZG n6
0-50	29	31	29	22	27	22	18	52	40	33	45	35	20
50-100	8	4	14	3	7	12	6	49	39	30	42	30	34
100-150	7	3	4	4	5	3	5	33	43	33	34	21	29
150-200	4	7	2	10	6	5	3	31	22	26	32	19	22
200-250	11	20	17	9	6	9	17	20	34	34	22	26	35
250-300	27	31	26	26	8	27	25	8	29	13	7	18	36
300-350	15	9	7	19	17	14	17	3	12	0	0	10	18
350-400	1	1	0	5	37	0	0	1	2	0	0	4	8

## Sheet: Figure 4G
Figure 4G: SOX9+ MZG cells at the IHF in E14-E16 Dcckanga mice
E14 wildtype SOX9+ glia	E14 Dcckanga/kanga SOX9+ glia	E15 wildtype SOX9+ glia	E15 Dcckanga/kanga SOX9+ glia	E16 wildtype SOX9+ glia	E16 Dcckanga/kanga SOX9+ glia
68	48	104	100	163	197
67	80	79	75	106	221
69	77	115	67	99	169
75	97	83	92	98	182
84	52	103	89	113	163
58	77	68	74	92	202
57	42	93	60	91
59	49	109	33
79		76	54
48			65
100
60
