# Supplementary material for: DCC regulates astroglial development essential for telencephalic morphogenesis and corpus callosum formation
Source: eLife. 2021 Apr 19;10:e61769. doi: 10.7554/eLife.61769 (PMC8116049; doi:10.7554/eLife.61769)
Supplement: Figure 5—figure supplement 1—source data 1. [file elife-61769-fig5-figsupp1-data1.xlsx]

## Sheet: Figure 5-S5A
Figure S5A: Quantification of average GFAP IF within the ventral telencephalic midline in E15 Dcckanga mice.
Wildtype	Dcckanga/kanga
1147.2	1090.89
837.553	915.599
822.061	826.791
967.282	921.353
976.329	1028.75
915.18	1051.94

## Sheet: Figure 5-S5D
Figure S5D: Ratio of mean gray value for mRNA within the telencephalic hinge over the ganglionic eminence for selected mRNA probes in E15 Dcckanga mice.
Fgf8 Wildtype	Fgf8 Dcckanga/kanga	Mmp-2 Wildtype	Mmp-2 Dcckanga/kanga
1.07715	1.0531	1.00936	1.11833
1.05307	1.0818	1.00442	1.04944
1.07575	1.0659	1.05049	1.08581
	1.04226	1.02676	1.08712
	1.05579		1.02523
	1.12796

## Sheet: Figure 5-S5G
Figure S5G: Quantification of NFI-positive/GLAST-positive MZG cell bodies at the IHF surface in E14 Dcckanga mice.
NFIA Wildtype	NFIA Dcckanga/kanga	NFIB Wildtype	NFIB Dcckanga/kanga
104	84	70	94
84	107	101	84
75	97	83	76
89	85	78	96
89	92	82	70
80	78		81
	73		72
	85		80
			81
