# Supplementary material for: DCC regulates astroglial development essential for telencephalic morphogenesis and corpus callosum formation
Source: eLife. 2021 Apr 19;10:e61769. doi: 10.7554/eLife.61769 (PMC8116049; doi:10.7554/eLife.61769)
Supplement: Figure 5—source data 1. [file elife-61769-fig5-data1.xlsx]

## Sheet: Figure 5B and 5C
Figure 5B and 5C: Normalised fluorescence intensity of GFAP adjacent to the telencephalic midline in E17 Dcc and Ntn1 mutant mice
Distance from the third ventricle (microns)	Control n1	Control n2	Control n3	Control n4	Control n5	Control n6	Control n7	Control n8	Control n9	DccKO/KO GFAP IF n1	DccKO/KO GFAP IF n2	DccKO/KO GFAP IF n3	DccKO/KO GFAP IF n4	DccKO/KO GFAP IF n5	DccKO/KO GFAP IF n6	DccKO/KO GFAP IF n7	Dcckanga/kanga GFAP IF n1	Dcckanga/kanga GFAP IF n2	Dcckanga/kanga GFAP IF n3	Dcckanga/kanga GFAP IF n4	Dcckanga/kanga GFAP IF n5	Dcckanga/kanga GFAP IF n6		Distance micron	Control n10	Control n11	Control n12	Control n13	Control n14	Control n15	Control n16	Control n17	Control n18	Ntn1-lacZ n1	Ntn1-lacZ n2	Ntn1-lacZ n3	Ntn1-lacZ n4	Ntn1-lacZ n5	Ntn1-lacZ n6
0	1.19299	0.939593	1.15581	0.800669	0.719007	1.00817	0.994477	0.992012	1.02347	1.00032	0.89555	1.00514	0.774396	0.873565	0.819837	0.981956	0.90221	0.820324	1.07304	0.963138	1.02399	1.40284		0	0.865154	1.38953	1.31176	1.04585	0.90405	1.18133	1.1709	1.17647	1.17163	1.61826	1.16213	1.23593	1.27594	1.32654	1.14045
0.625	1.17942	0.936213	1.15305	0.795367	0.722913	1.00794	1.01694	0.989229	0.997026	1.00036	0.908601	1.0027	0.773728	0.884127	0.833741	1.00335	0.907935	0.820441	1.083	0.960313	1.03131	1.40853		0.563	0.884566	1.40668	1.31421	1.05362	0.903563	1.18754	1.17182	1.18564	1.16359	1.62431	1.15482	1.24395	1.27331	1.33792	1.14784
1.25	1.17882	0.931952	1.14239	0.793894	0.719758	0.995433	1.01239	0.994542	0.980376	0.99698	0.925373	1.00204	0.773368	0.882748	0.846488	1.00944	0.92168	0.820606	1.105	0.985097	1.0273	1.39249		1.126	0.879333	1.38233	1.30677	1.06286	0.902727	1.18362	1.18084	1.19141	1.17396	1.60853	1.14622	1.24117	1.26964	1.32401	1.17872
1.875	1.19021	0.924893	1.12927	0.799116	0.722428	0.991543	0.990214	0.973483	0.971631	0.987279	0.937451	1.00441	0.772742	0.877002	0.827941	1.00282	0.930061	0.820332	1.10797	0.988833	1.02449	1.45169		1.69	0.87884	1.36539	1.32377	1.07424	0.900723	1.18298	1.17113	1.19911	1.19884	1.58021	1.13689	1.25246	1.26701	1.33569	1.16646
2.5	1.1857	0.920931	1.11853	0.794012	0.721431	0.988638	0.983767	0.975711	0.970461	0.98547	0.946823	1.00666	0.774213	0.878937	0.831845	1.00056	0.951171	0.820003	1.09075	0.986911	1.03543	1.47961		2.253	0.88233	1.36228	1.32009	1.07857	0.907432	1.19125	1.17182	1.19825	1.18615	1.575	1.15966	1.26767	1.26349	1.35584	1.19073
3.125	1.1712	0.928196	1.11418	0.79571	0.722025	0.99761	0.990546	0.97347	0.969643	0.995526	0.957312	1.01496	0.775398	0.882285	0.82335	0.991214	0.963588	0.819869	1.08346	0.97149	1.03897	1.44819		2.816	0.882279	1.33746	1.35426	1.08556	0.930077	1.18887	1.19913	1.18566	1.20797	1.5669	1.16304	1.25109	1.26952	1.34989	1.21141
3.75	1.18716	0.926078	1.1124	0.794502	0.722714	1.0055	1.00066	0.968027	0.961119	0.995606	0.974565	1.01176	0.774942	0.894542	0.813577	0.987121	0.978456	0.82012	1.09472	0.976421	1.0403	1.39239		3.379	0.877375	1.33505	1.33763	1.10154	0.944759	1.19945	1.18484	1.1885	1.18186	1.5985	1.17327	1.26845	1.2683	1.34496	1.27219
4.375	1.21748	0.920387	1.10326	0.790934	0.729719	1.00073	1.01041	0.990357	0.942241	0.997294	0.997483	1.01054	0.773034	0.898405	0.832085	0.98811	0.999518	0.820873	1.09655	0.970658	1.01455	1.37183		3.942	0.882608	1.31148	1.29976	1.08851	0.973625	1.20058	1.22363	1.18923	1.16485	1.61234	1.21335	1.2923	1.26727	1.37611	1.2362
5	1.19814	0.927199	1.09341	0.78835	0.736252	1.01291	1.00041	1.00219	0.91579	0.996591	1.01174	1.01491	0.770533	0.902848	0.844284	0.987501	1.00253	0.82092	1.09615	0.970334	1.01339	1.38994		4.506	0.902073	1.31403	1.32038	1.1077	0.997319	1.19165	1.225	1.18128	1.16857	1.60597	1.17598	1.31361	1.2631	1.35378	1.19045
5.625	1.21049	0.937326	1.09213	0.788562	0.749797	1.0348	0.986799	0.998857	0.887723	0.99217	1.01768	1.02908	0.771603	0.914251	0.839003	0.987355	1.00794	0.820912	1.09339	0.998016	1.04931	1.42529		5.069	0.915271	1.31587	1.33333	1.11264	1.01072	1.17709	1.22529	1.18108	1.17721	1.58095	1.21818	1.30996	1.25508	1.33733	1.19426
6.25	1.26133	0.949624	1.09399	0.792041	0.767615	1.04028	0.974687	0.986706	0.868865	0.996845	1.0232	1.04175	0.772638	0.938553	0.844661	1.00437	1.0022	0.820638	1.09344	0.986727	1.02665	1.41035		5.632	0.921235	1.33244	1.33793	1.11741	1.0272	1.16876	1.23593	1.18725	1.14256	1.57644	1.21709	1.30059	1.24209	1.32454	1.19943
6.875	1.3386	0.956157	1.08948	0.789821	0.780028	1.05566	0.976068	0.960895	0.867995	1.00127	1.03151	1.04524	0.771522	0.968069	0.837101	1.03419	1.0128	0.821642	1.09655	0.980904	1.02329	1.36248		6.195	0.913044	1.31776	1.36187	1.11533	1.03119	1.17056	1.24653	1.18802	1.19746	1.57085	1.25792	1.29366	1.24109	1.34453	1.20318
7.5	1.38266	0.977119	1.0946	0.786299	0.788131	1.06695	0.97932	0.968108	0.871039	0.994863	1.05411	1.05115	0.769055	0.989239	0.834916	1.06295	1.02878	0.826022	1.10736	0.965931	1.06248	1.38101		6.759	0.936473	1.32253	1.35994	1.11678	1.03803	1.17006	1.2137	1.18696	1.21512	1.55791	1.25367	1.31387	1.23719	1.3543	1.22799
8.125	1.5549	0.990756	1.09429	0.783647	0.791292	1.07589	0.974858	0.981729	0.876134	0.991908	1.07732	1.05529	0.767576	0.996352	0.832193	1.10399	1.05349	0.834509	1.11342	0.966617	1.06847	1.38088		7.322	0.948971	1.31677	1.3594	1.08403	1.05025	1.15546	1.2324	1.20474	1.21897	1.54718	1.25547	1.33525	1.2362	1.38123	1.25943
8.75	1.44745	0.990742	1.09912	0.785559	0.795477	1.08764	0.987827	0.978659	0.882129	1.00697	1.09379	1.05627	0.767338	0.992466	0.829368	1.12179	1.07765	0.844965	1.10512	0.977068	1.05751	1.44282		7.885	0.929778	1.32634	1.35652	1.12118	1.05284	1.16137	1.23641	1.22513	1.29726	1.53482	1.2462	1.34815	1.23944	1.41719	1.22228
9.375	1.31018	0.982565	1.11089	0.787016	0.811492	1.08553	0.99707	0.993311	0.886985	1.01811	1.11544	1.06875	0.770084	0.993879	0.829173	1.15185	1.07186	0.855908	1.10777	0.994709	1.03404	1.48518		8.448	0.913653	1.35473	1.34702	1.11814	1.0559	1.15237	1.22558	1.25416	1.24734	1.51144	1.26017	1.34184	1.23496	1.38162	1.21767
10	1.2381	0.973751	1.12415	0.785045	0.832458	1.09727	0.997474	1.03095	0.896925	1.02264	1.13836	1.06528	0.771432	0.992138	0.826306	1.17542	1.07147	0.865116	1.11532	0.997507	1.03442	1.54518		9.011	0.91356	1.3533	1.33791	1.10711	1.09017	1.15949	1.23435	1.26867	1.24294	1.52684	1.28579	1.34427	1.23289	1.35584	1.23523
10.625	1.20348	0.978044	1.12485	0.78676	0.842207	1.10037	1.00987	1.03481	0.903976	1.02286	1.16165	1.05685	0.770227	1.00013	0.841024	1.17798	1.06308	0.872409	1.1352	0.975167	1.05244	1.55196		9.575	0.91764	1.32961	1.3478	1.11907	1.10644	1.16591	1.24121	1.27887	1.23427	1.52382	1.26017	1.34036	1.23743	1.35809	1.28016
11.25	1.19273	0.975707	1.12401	0.78512	0.854729	1.10951	1.02799	1.01205	0.908234	1.01931	1.18013	1.06148	0.772557	1.00882	0.87017	1.14849	1.06195	0.881358	1.13605	0.985909	1.06325	1.41526		10.138	0.955607	1.36508	1.32565	1.12118	1.12176	1.1814	1.2382	1.2805	1.23153	1.52781	1.27415	1.32895	1.24897	1.3584	1.29616
11.875	1.1947	0.98507	1.13272	0.789132	0.864048	1.09825	1.04797	1.00161	0.919611	1.00427	1.20526	1.06186	0.774928	1.02279	0.895241	1.15129	1.05368	0.891838	1.12463	0.996411	1.06263	1.42213		10.701	0.932538	1.34916	1.32534	1.13748	1.17246	1.18516	1.24283	1.27852	1.20782	1.5269	1.30513	1.33276	1.24126	1.39433	1.33107
12.5	1.1851	0.986981	1.138	0.79229	0.874848	1.08123	1.06988	1.00962	0.933178	0.996578	1.23242	1.07306	0.778409	1.03092	0.871395	1.16073	1.06258	0.903651	1.10473	1.02557	1.06007	1.41903		11.264	0.922853	1.35709	1.31657	1.13688	1.16512	1.18385	1.25113	1.27814	1.19434	1.52324	1.32906	1.34717	1.23947	1.38704	1.34772
13.125	1.19977	0.990528	1.14337	0.798538	0.869625	1.07958	1.09399	1.00779	0.952481	0.996282	1.26125	1.09519	0.782716	1.03681	0.862601	1.19166	1.10836	0.912435	1.09408	1.05446	1.05919	1.40092		11.827	0.932178	1.33377	1.2954	1.14098	1.19921	1.18405	1.26724	1.28243	1.17735	1.49973	1.33456	1.33506	1.23714	1.36758	1.3334
13.75	1.21919	0.98268	1.13935	0.804845	0.867413	1.09371	1.10606	1.02812	0.978912	0.998835	1.2892	1.09695	0.78758	1.05154	0.870036	1.21828	1.16982	0.918394	1.10577	1.03203	1.04145	1.41597		12.391	0.932651	1.31815	1.29736	1.1276	1.20335	1.18054	1.24289	1.27491	1.19127	1.51664	1.32074	1.32376	1.24163	1.39479	1.35846
14.375	1.20969	0.983536	1.11755	0.81803	0.869735	1.10047	1.11182	1.03181	0.994847	1.00498	1.26865	1.09496	0.792609	1.05829	0.870624	1.23908	1.19285	0.91812	1.12518	1.01528	1.0503	1.4125		12.954	0.922451	1.30612	1.32026	1.14003	1.20159	1.17323	1.26909	1.28077	1.20678	1.49358	1.2956	1.34836	1.24196	1.42185	1.3763
15	1.19959	0.984513	1.10098	0.841328	0.873693	1.11401	1.13397	1.04991	0.989783	1.00801	1.25061	1.09289	0.797616	1.04649	0.875411	1.26091	1.20831	0.919233	1.13034	0.98831	1.06685	1.40289		13.517	0.930591	1.3163	1.29886	1.16902	1.21963	1.17463	1.27207	1.27553	1.27011	1.48815	1.26959	1.37266	1.23287	1.42046	1.37322
15.625	1.18846	0.985996	1.1222	0.862453	0.877613	1.10177	1.1451	1.06109	0.971339	1.01367	1.23885	1.10095	0.80184	1.0369	0.87979	1.27819	1.21918	0.933647	1.12405	0.993657	1.07269	1.36316		14.08	0.92752	1.3199	1.28608	1.14113	1.21051	1.17283	1.25086	1.27977	1.20565	1.49908	1.30116	1.35855	1.2404	1.4302	1.35321
16.25	1.18522	0.991228	1.14316	0.894732	0.888884	1.10697	1.1238	1.06313	0.954574	1.02075	1.22672	1.09748	0.809621	1.02394	0.873461	1.30792	1.24776	0.946858	1.1156	1.03677	1.06222	1.36445		14.643	0.921009	1.33251	1.31359	1.15564	1.20897	1.17415	1.25426	1.27821	1.28517	1.49925	1.32341	1.35188	1.24086	1.43398	1.36553
16.875	1.20081	1.00495	1.14679	0.928565	0.886733	1.11261	1.11388	1.04583	0.934461	1.02351	1.22092	1.11813	0.818096	1.02935	0.868603	1.34955	1.26541	0.95645	1.12246	1.04068	1.0828	1.37539		15.207	0.933475	1.30703	1.30738	1.17177	1.20389	1.19112	1.24013	1.28734	1.29679	1.48123	1.29615	1.36216	1.23453	1.40614	1.35426
17.5	1.18655	1.00358	1.13382	0.949493	0.902156	1.11796	1.12486	1.05976	0.922528	1.0255	1.22242	1.12388	0.824965	1.05957	0.870592	1.40003	1.29559	0.969647	1.12755	1.02875	1.06361	1.375		15.77	0.957553	1.29628	1.28327	1.15595	1.22435	1.20109	1.23496	1.29324	1.22036	1.50739	1.26143	1.36802	1.22641	1.38586	1.36572
18.125	1.18223	0.991079	1.13696	0.963644	0.917441	1.13872	1.13989	1.04447	0.915949	1.03192	1.23348	1.151	0.829182	1.08797	0.873586	1.40565	1.32857	0.986579	1.12679	1.01898	1.05002	1.37902		16.333	0.953567	1.31322	1.29659	1.14238	1.22968	1.19742	1.23675	1.28807	1.20943	1.5072	1.25376	1.37406	1.23399	1.39331	1.33026
18.75	1.20153	0.990652	1.14806	0.979708	0.939697	1.12995	1.14061	1.04522	0.910973	1.0373	1.237	1.1943	0.834667	1.12264	0.869392	1.38956	1.36281	1.00103	1.12217	1.01799	1.07168	1.44267		16.896	0.967105	1.33219	1.29886	1.14472	1.25158	1.17373	1.25285	1.26216	1.20271	1.52195	1.25103	1.36572	1.25277	1.43141	1.30611
19.375	1.24188	1.00184	1.15635	0.99547	0.947043	1.11885	1.16693	1.03869	0.898621	1.03944	1.24334	1.19999	0.845282	1.15688	0.860087	1.37136	1.36483	1.01658	1.11862	1.0351	1.0856	1.47796		17.46	0.964076	1.36031	1.30253	1.12981	1.2393	1.16537	1.25384	1.26385	1.22164	1.52522	1.28253	1.36151	1.25184	1.46052	1.32264
20	1.2708	1.00302	1.16217	1.01523	0.940755	1.1347	1.18666	1.0394	0.885624	1.03634	1.25412	1.20985	0.854269	1.18656	0.855552	1.35141	1.38128	1.02838	1.12145	1.03065	1.05616	1.46866		18.023	0.973842	1.3503	1.33704	1.14789	1.25965	1.16413	1.24495	1.25372	1.264	1.4995	1.31009	1.36951	1.25192	1.54603	1.37321
20.625	1.32432	0.999303	1.17142	1.04189	0.95983	1.15149	1.21023	1.056	0.879125	1.04489	1.26598	1.21478	0.862996	1.2061	0.863593	1.33402	1.38073	1.04653	1.12861	1.04207	1.05172	1.44172		18.586	0.973443	1.35252	1.35845	1.14457	1.26419	1.1649	1.25782	1.25829	1.24056	1.51015	1.28989	1.38459	1.25599	1.51404	1.38113
21.25	1.33115	0.99431	1.17844	1.07386	0.967408	1.16469	1.22976	1.0739	0.880979	1.0555	1.27428	1.22772	0.875015	1.21303	0.86562	1.32447	1.39706	1.07535	1.13356	1.03246	1.05164	1.47625		19.149	0.961512	1.35948	1.34732	1.13365	1.26889	1.16227	1.25555	1.2731	1.2406	1.5289	1.29275	1.41474	1.26517	1.50505	1.36777
21.875	1.35226	0.995845	1.15817	1.09519	0.970699	1.17801	1.24423	1.09123	0.894061	1.0585	1.28045	1.23267	0.882619	1.21297	0.869132	1.3319	1.40687	1.1081	1.13693	1.03228	1.06455	1.49958		19.712	0.99339	1.34309	1.32776	1.13571	1.29584	1.161	1.30605	1.26833	1.22359	1.53738	1.28056	1.4422	1.27227	1.54059	1.38776
22.5	1.3733	1.00546	1.15563	1.12663	0.975689	1.17584	1.2415	1.08472	0.91781	1.06103	1.27964	1.22755	0.888683	1.234	0.893206	1.33719	1.41649	1.15392	1.13678	1.04322	1.0498	1.48362		20.276	0.963798	1.36485	1.36759	1.13717	1.2992	1.17499	1.26391	1.27819	1.2296	1.55008	1.29205	1.44398	1.27383	1.55385	1.39124
23.125	1.4053	0.99468	1.16169	1.16913	0.977082	1.1739	1.22804	1.07054	0.927636	1.06764	1.27986	1.22344	0.893914	1.2543	0.897324	1.34543	1.44173	1.19802	1.13129	1.03093	1.05754	1.51123		20.839	0.955134	1.33628	1.3574	1.13482	1.31212	1.1855	1.23496	1.29054	1.22026	1.55403	1.28449	1.43234	1.26948	1.58859	1.4519
23.75	1.4435	0.988897	1.14391	1.20846	0.982263	1.16553	1.21523	1.06715	0.916136	1.07668	1.27977	1.22595	0.897008	1.26144	0.892625	1.35003	1.47576	1.21925	1.13196	1.02742	1.04762	1.48344		21.402	0.963767	1.33617	1.34415	1.16214	1.28863	1.19381	1.24049	1.26327	1.2106	1.58734	1.27966	1.4219	1.26569	1.58891	1.41287
24.375	1.46522	0.998895	1.13727	1.23486	1.00103	1.17547	1.2314	1.0771	0.903729	1.07774	1.28275	1.20283	0.901158	1.26124	0.89248	1.35049	1.59258	1.23403	1.13952	1.03837	1.0431	1.45538		21.965	0.957647	1.33247	1.3375	1.14659	1.3108	1.19986	1.29215	1.26122	1.2232	1.59112	1.28923	1.41597	1.26741	1.58767	1.38579
25	1.45481	1.00792	1.13947	1.26087	1.02043	1.18806	1.24225	1.07102	0.900586	1.0807	1.27136	1.20118	0.90665	1.28854	0.884792	1.339	1.88692	1.25682	1.14978	1.05059	1.06119	1.4788		22.528	0.961778	1.3071	1.35636	1.15866	1.32818	1.18683	1.28137	1.26794	1.21479	1.61503	1.26963	1.4237	1.2686	1.59868	1.42122
25.625	1.41777	1.01138	1.14609	1.30396	1.02762	1.18058	1.21294	1.07924	0.904706	1.08637	1.28642	1.20035	0.916134	1.30018	0.878375	1.33286	2.2902	1.2812	1.16269	1.07855	1.0818	1.44782		23.092	0.952136	1.34152	1.34597	1.1749	1.32986	1.17296	1.27859	1.26885	1.16742	1.65577	1.26004	1.43557	1.26758	1.57216	1.41488
26.25	1.41578	1.00414	1.15248	1.32751	1.03686	1.18938	1.20571	1.09497	0.916061	1.09279	1.30284	1.18891	0.928874	1.29363	0.891962	1.32894	2.26229	1.29928	1.17645	1.05089	1.08895	1.42966		23.655	0.943182	1.31306	1.34996	1.15514	1.34272	1.1676	1.27821	1.27601	1.17326	1.69113	1.27497	1.42546	1.26377	1.57235	1.40921
26.875	1.41322	0.994148	1.16152	1.32936	1.03528	1.19279	1.20167	1.12613	0.927232	1.09506	1.30431	1.17244	0.932941	1.29076	0.886169	1.32014	2.09116	1.31188	1.16864	1.04024	1.08466	1.42488		24.218	0.949456	1.32398	1.37728	1.15641	1.36562	1.16374	1.28211	1.28007	1.18268	1.69026	1.30956	1.41359	1.26257	1.58423	1.40312
27.5	1.40622	0.985516	1.16473	1.32909	1.03064	1.18955	1.22036	1.10225	0.931929	1.09949	1.31951	1.16328	0.935592	1.27889	0.884583	1.31366	1.89581	1.33613	1.16712	1.04153	1.08643	1.42095		24.781	0.956318	1.32681	1.36915	1.18065	1.37222	1.17465	1.30376	1.27812	1.19612	1.6953	1.32265	1.40934	1.27553	1.52849	1.40616
28.125	1.39593	0.984513	1.16126	1.33364	1.01277	1.18298	1.22887	1.06924	0.93591	1.0986	1.35452	1.18121	0.945104	1.34619	0.885133	1.30786	1.84603	1.36536	1.16786	1.04576	1.1074	1.38884		25.344	0.951898	1.34411	1.37789	1.19775	1.37469	1.17938	1.30124	1.27212	1.21253	1.70491	1.29927	1.40446	1.28687	1.47282	1.38288
28.75	1.38671	0.988405	1.15915	1.34292	1.01961	1.19086	1.22458	1.06482	0.940521	1.09965	1.36142	1.18769	0.956291	1.51607	0.869955	1.30247	1.85694	1.38591	1.17148	1.04233	1.08457	1.35305		25.908	0.962903	1.33518	1.352	1.17409	1.38533	1.16976	1.31377	1.26209	1.22629	1.74591	1.30378	1.40819	1.29758	1.47408	1.38815
29.375	1.36915	0.999187	1.15918	1.35258	1.04596	1.2019	1.24309	1.07161	0.944767	1.10871	1.33377	1.19946	0.966571	1.51159	0.874584	1.3061	1.88113	1.41642	1.18078	1.04256	1.07975	1.36768		26.471	0.967311	1.33382	1.35642	1.16754	1.36068	1.17572	1.27455	1.25618	1.21438	1.76081	1.27985	1.39541	1.32468	1.48352	1.39186
30	1.35433	1.01262	1.16736	1.35425	1.04528	1.21018	1.24141	1.08535	0.944906	1.12243	1.2973	1.22383	0.970196	1.47394	0.880927	1.31229	1.95606	1.46058	1.17466	1.06358	1.08608	1.38291		27.034	0.977781	1.3058	1.33265	1.15478	1.36563	1.17837	1.26488	1.27376	1.18463	1.78045	1.29811	1.39274	1.32853	1.47236	1.39133
30.625	1.3227	1.01253	1.18149	1.36542	1.05777	1.20391	1.23751	1.08395	0.952202	1.1284	1.2835	1.23153	0.973882	1.41663	0.882038	1.33127	1.93705	1.49111	1.1665	1.06612	1.07661	1.43017		27.597	0.970618	1.30746	1.3213	1.18722	1.35417	1.18143	1.2887	1.29238	1.1916	1.82194	1.31773	1.38748	1.34237	1.44583	1.40708
31.25	1.3185	1.01988	1.19278	1.36214	1.04819	1.23706	1.21199	1.07523	0.972932	1.12725	1.30071	1.23758	0.987611	1.38658	0.885089	1.33409	1.90445	1.50637	1.17242	1.08447	1.09772	1.43324		28.16	0.991976	1.31426	1.29602	1.17373	1.34616	1.18128	1.27293	1.29354	1.14301	1.86143	1.33562	1.40004	1.35718	1.45106	1.41397
31.875	1.30976	1.02311	1.19586	1.35639	1.04367	1.24607	1.23739	1.07757	0.996515	1.11366	1.29764	1.21316	0.995739	1.37909	0.900022	1.32715	1.87034	1.52095	1.16632	1.09211	1.07892	1.42598		28.724	0.997869	1.35632	1.29631	1.15506	1.34236	1.21345	1.25515	1.29088	1.15868	1.92392	1.32624	1.4254	1.36808	1.43108	1.43188
32.5	1.32627	1.036	1.20602	1.37342	1.04525	1.25642	1.22984	1.08161	1.00776	1.10902	1.31793	1.20229	1.00398	1.38596	0.912846	1.32213	1.89413	1.53306	1.16209	1.09188	1.07806	1.41326		29.287	1.00793	1.35129	1.28879	1.17947	1.34315	1.23692	1.24667	1.28745	1.19686	1.9449	1.30437	1.42931	1.37638	1.45529	1.45265
33.125	1.32396	1.02615	1.22541	1.39475	1.04911	1.27307	1.22483	1.0855	1.00903	1.10895	1.35776	1.19494	1.01958	1.46177	0.915283	1.33517	1.90845	1.53791	1.16555	1.08424	1.09474	1.42996		29.85	1.03131	1.32886	1.29124	1.16612	1.33584	1.22084	1.28747	1.28961	1.19427	1.95701	1.30993	1.41743	1.36327	1.46023	1.45677
33.75	1.30708	1.0163	1.228	1.36527	1.05963	1.26623	1.28804	1.08977	1.00821	1.11464	1.3485	1.21201	1.0275	1.57181	0.925851	1.34496	1.92135	1.54015	1.17963	1.09197	1.09699	1.39851		30.413	1.04667	1.3433	1.30139	1.16652	1.32995	1.22504	1.3128	1.28943	1.16656	2.00375	1.34402	1.40742	1.35336	1.47746	1.47883
34.375	1.32145	1.02063	1.22752	1.34171	1.07696	1.27466	1.33014	1.12676	1.00618	1.11571	1.34453	1.23903	1.03401	1.59021	0.95753	1.34371	2.00017	1.56066	1.19976	1.09048	1.07309	1.41883		30.977	1.06655	1.35357	1.31713	1.15055	1.32805	1.21345	1.27092	1.29842	1.20285	2.01574	1.31609	1.43676	1.36085	1.45977	1.47051
35	1.37255	1.01836	1.23927	1.35891	1.08339	1.27704	1.38546	1.1211	0.995338	1.12242	1.33764	1.23922	1.05629	1.59205	0.959614	1.34312	2.09472	1.5974	1.1953	1.08685	1.07808	1.46069		31.54	1.07946	1.33357	1.31059	1.16927	1.31221	1.19506	1.28658	1.30387	1.23293	2.02427	1.32171	1.46788	1.37788	1.46843	1.48307
35.625	1.34495	1.0229	1.23596	1.34883	1.08993	1.26522	1.42975	1.11505	0.981358	1.13597	1.31903	1.22763	1.08102	1.57773	0.952597	1.34288	2.13285	1.60708	1.1786	1.09166	1.08772	1.46269		32.103	1.0703	1.34922	1.33959	1.14434	1.32234	1.18836	1.30084	1.32113	1.25343	2.01311	1.32982	1.48054	1.39658	1.49987	1.49519
36.25	1.2877	1.02528	1.22902	1.33629	1.11418	1.28493	1.35952	1.11632	0.978987	1.14576	1.27314	1.22846	1.0959	1.5524	0.95247	1.34693	2.15965	1.58516	1.17917	1.10594	1.10022	1.43187		32.666	1.04864	1.38554	1.33434	1.1556	1.29278	1.18677	1.26297	1.32199	1.2508	2.02982	1.32469	1.43743	1.41092	1.50251	1.50277
36.875	1.28099	1.0285	1.23038	1.34623	1.12932	1.28567	1.37197	1.10467	0.983106	1.15096	1.2375	1.22445	1.10326	1.53922	0.949381	1.38344	2.12795	1.56277	1.1741	1.10087	1.07144	1.42472		33.229	1.0442	1.3547	1.33317	1.16996	1.27546	1.18634	1.28054	1.3085	1.26252	2.00731	1.32791	1.42094	1.40647	1.49498	1.48395
37.5	1.27859	1.04169	1.23355	1.3332	1.15133	1.30373	1.36953	1.09953	0.984859	1.15509	1.23377	1.21871	1.09639	1.51992	0.936463	1.39914	2.26129	1.55712	1.1635	1.11457	1.06773	1.44827		33.793	1.05105	1.35272	1.33158	1.16139	1.29105	1.20452	1.28601	1.32872	1.25586	2.00713	1.31975	1.45127	1.39769	1.51361	1.49999
38.125	1.28226	1.04302	1.2381	1.33702	1.19798	1.31624	1.33496	1.11201	0.99476	1.16365	1.22916	1.23296	1.08717	1.52717	0.935434	1.38241	2.27461	1.5404	1.16118	1.10729	1.08581	1.47105		34.356	1.06623	1.35828	1.32066	1.16251	1.26385	1.19643	1.2771	1.32081	1.2495	2.03245	1.32816	1.4533	1.39599	1.53377	1.49072
38.75	1.29313	1.03169	1.2453	1.36845	1.18562	1.35186	1.33879	1.12621	0.999738	1.18241	1.20859	1.2596	1.09585	1.53612	0.928757	1.39714	2.16562	1.51129	1.16372	1.11736	1.10772	1.53909		34.919	1.07244	1.35066	1.31062	1.16646	1.26301	1.20744	1.31339	1.33494	1.20351	1.9947	1.34002	1.43958	1.39145	1.5206	1.4779
39.375	1.28808	1.02903	1.24866	1.41419	1.15396	1.37221	1.34026	1.12816	0.988986	1.20707	1.19588	1.25668	1.11667	1.5802	0.92841	1.42662	2.06124	1.48132	1.17188	1.12466	1.0876	1.55699		35.482	1.09092	1.3483	1.32093	1.18438	1.25274	1.2133	1.31076	1.32904	1.20317	2.04293	1.32375	1.43545	1.38841	1.49962	1.48025
40	1.29595	1.03961	1.25243	1.38718	1.15916	1.36951	1.3721	1.13142	0.982449	1.21969	1.18498	1.26028	1.13165	1.64198	0.921114	1.44676	2.02172	1.46606	1.17749	1.12146	1.0845	1.52462		36.045	1.08008	1.34486	1.34898	1.1704	1.26191	1.2311	1.30117	1.32894	1.20295	2.02724	1.33453	1.46433	1.39188	1.49111	1.47882
40.625	1.29484	1.05084	1.24917	1.36263	1.17033	1.34137	1.38676	1.12014	0.992163	1.23388	1.20295	1.31146	1.1421	1.59062	0.925208	1.45687	2.03138	1.47041	1.17734	1.10768	1.08344	1.49324		36.609	1.05161	1.29554	1.34034	1.17323	1.25457	1.24271	1.32293	1.32472	1.1681	2.04015	1.3295	1.47335	1.39278	1.47081	1.46641
41.25	1.28906	1.05679	1.25666	1.3545	1.19673	1.33813	1.39484	1.12231	1.00526	1.26263	1.21697	1.38552	1.14839	1.57575	0.93364	1.43801	1.99381	1.47994	1.19132	1.11597	1.07497	1.49773		37.172	1.04326	1.30758	1.34639	1.17917	1.2526	1.24399	1.31839	1.32442	1.16586	2.05861	1.35494	1.44591	1.40027	1.46935	1.487
41.875	1.31355	1.05034	1.24849	1.36073	1.16675	1.32818	1.44262	1.12678	1.01303	1.30056	1.24506	1.45053	1.15947	1.56134	0.936994	1.4302	1.99635	1.49735	1.20806	1.13411	1.07405	1.47787		37.735	1.03523	1.30089	1.35152	1.1812	1.25291	1.24986	1.30105	1.30578	1.15864	2.07544	1.37437	1.41982	1.40044	1.50547	1.49409
42.5	1.3169	1.06309	1.25456	1.34974	1.16059	1.34433	1.44749	1.12604	1.01667	1.35579	1.23077	1.47193	1.17719	1.52138	0.936842	1.40759	1.97017	1.50418	1.21276	1.13997	1.09854	1.51119		38.298	1.05388	1.33576	1.36926	1.19322	1.23592	1.2517	1.29547	1.31918	1.15455	2.10046	1.39649	1.409	1.39058	1.48865	1.4924
43.125	1.32254	1.06521	1.26136	1.36455	1.18001	1.36262	1.43048	1.13591	1.01692	1.40692	1.23016	1.43411	1.17909	1.52069	0.954314	1.38721	1.8879	1.49196	1.21259	1.14129	1.08792	1.48265		38.861	1.05477	1.3236	1.38347	1.19991	1.23395	1.23812	1.31776	1.32222	1.14998	2.12779	1.41137	1.42642	1.3993	1.5027	1.49062
43.75	1.29952	1.06444	1.26545	1.37405	1.18969	1.36484	1.37562	1.14554	1.01291	1.42973	1.22891	1.38261	1.17202	1.51781	0.961951	1.38297	1.87495	1.48099	1.21237	1.15612	1.08108	1.47184		39.425	1.06759	1.31439	1.38051	1.19881	1.23194	1.23061	1.29709	1.33423	1.17328	2.15162	1.38802	1.43892	1.41839	1.51336	1.47717
44.375	1.29577	1.0698	1.26948	1.37139	1.21671	1.3824	1.33092	1.13223	1.01755	1.43799	1.23929	1.35729	1.1623	1.51763	0.960133	1.38777	1.96128	1.46216	1.22065	1.16345	1.08678	1.46244		39.988	1.06444	1.32822	1.38617	1.2031	1.21178	1.22812	1.27643	1.33362	1.11756	2.17325	1.39752	1.43753	1.43229	1.50338	1.50358
45	1.30542	1.07727	1.27327	1.40084	1.21677	1.37982	1.33565	1.11538	1.01467	1.44873	1.25321	1.37643	1.15505	1.48298	0.979329	1.37963	1.99413	1.4523	1.22709	1.16321	1.08798	1.48287		40.551	1.06327	1.36153	1.38042	1.17311	1.23263	1.2359	1.30448	1.33671	1.1199	2.19248	1.39815	1.41933	1.43688	1.49392	1.51114
45.625	1.32335	1.0692	1.28796	1.38983	1.19335	1.40852	1.36892	1.13054	1.01451	1.44262	1.24984	1.45424	1.15921	1.42664	1.00247	1.39946	2.01489	1.44012	1.21651	1.16868	1.09138	1.50967		41.114	1.06589	1.35796	1.38434	1.15793	1.21147	1.23633	1.3119	1.32936	1.13066	2.23652	1.42035	1.42894	1.45129	1.48677	1.49938
46.25	1.34539	1.08087	1.30675	1.41077	1.17317	1.42264	1.40409	1.17656	1.01903	1.42379	1.24215	1.47372	1.18107	1.41285	1.01806	1.43372	2.04585	1.43007	1.21136	1.16242	1.09104	1.49837		41.678	1.06233	1.36428	1.36569	1.17188	1.22216	1.2408	1.28797	1.32937	1.18424	2.21154	1.43198	1.442	1.46464	1.47606	1.50588
46.875	1.33157	1.07994	1.32823	1.39435	1.17383	1.45149	1.41402	1.22566	1.02732	1.41517	1.23165	1.4432	1.21141	1.40505	1.03786	1.44857	2.12168	1.43193	1.20812	1.16584	1.10972	1.50455		42.241	1.07621	1.37737	1.39851	1.18805	1.21617	1.24832	1.30737	1.31761	1.17049	2.22441	1.45589	1.43336	1.46355	1.48877	1.51136
47.5	1.32641	1.06326	1.39039	1.39823	1.19153	1.45264	1.40301	1.24605	1.04422	1.40081	1.21402	1.39932	1.22469	1.41502	1.05761	1.45026	2.09633	1.42463	1.21016	1.20313	1.08763	1.47016		42.804	1.07057	1.38516	1.39664	1.18174	1.20934	1.25086	1.32983	1.32794	1.13105	2.18005	1.45742	1.43936	1.46195	1.48271	1.52175
48.125	1.35539	1.06767	1.40478	1.41619	1.20076	1.41411	1.39467	1.22704	1.05606	1.39325	1.22083	1.35052	1.22919	1.42026	1.08388	1.44856	2.06763	1.42433	1.21358	1.23191	1.09297	1.48703		43.367	1.0693	1.40001	1.37209	1.18914	1.18919	1.25078	1.32689	1.34018	1.15256	2.14279	1.46577	1.4507	1.47606	1.45268	1.54968
48.75	1.34683	1.07538	1.35367	1.44052	1.21259	1.40584	1.39429	1.19379	1.05124	1.39611	1.25145	1.32954	1.22479	1.45489	1.10807	1.44841	2.06008	1.42527	1.22252	1.20621	1.10008	1.49113		43.93	1.09494	1.41928	1.38221	1.19547	1.19906	1.24624	1.31442	1.3395	1.199	2.11575	1.45609	1.46536	1.47404	1.46292	1.57808
49.375	1.35397	1.08314	1.33476	1.4454	1.23426	1.41344	1.41565	1.19044	1.03799	1.39854	1.28404	1.32954	1.22285	1.47197	1.07488	1.43394	2.03594	1.42262	1.22979	1.19309	1.10647	1.54707		44.494	1.06931	1.39428	1.39208	1.19925	1.19923	1.23815	1.3471	1.33376	1.21634	2.09739	1.44683	1.48239	1.47602	1.46552	1.5707
50	1.34253	1.08706	1.33819	1.45769	1.24706	1.40163	1.41568	1.18805	1.03746	1.39757	1.29737	1.32062	1.22506	1.49446	1.06105	1.41516	2.00583	1.41576	1.23259	1.19997	1.10622	1.57379		45.057	1.10819	1.38221	1.38316	1.19624	1.22196	1.22356	1.29251	1.32904	1.17961	2.10112	1.4536	1.48228	1.48941	1.48593	1.55519
50.625	1.35524	1.08767	1.33532	1.50517	1.27744	1.36974	1.40982	1.15797	1.05811	1.38949	1.26594	1.32379	1.22258	1.50441	1.06658	1.40724	2.05497	1.41291	1.229	1.2039	1.10244	1.63294		45.62	1.10341	1.38	1.37855	1.21273	1.21534	1.21894	1.31238	1.32288	1.16306	2.13073	1.45421	1.4837	1.5003	1.48321	1.60884
51.25	1.37334	1.08332	1.34105	1.5064	1.2918	1.35946	1.42865	1.18091	1.07298	1.39976	1.26401	1.36707	1.21417	1.52846	1.08698	1.41602	2.10609	1.4103	1.2388	1.20247	1.10917	1.61364		46.183	1.1035	1.38238	1.37612	1.19766	1.21795	1.21831	1.31562	1.33885	1.18821	2.15917	1.44339	1.48835	1.50969	1.46479	1.63034
51.875	1.37806	1.08065	1.34564	1.48255	1.2962	1.33912	1.43345	1.20388	1.07105	1.42653	1.26349	1.33023	1.20136	1.55563	1.09654	1.43552	2.14817	1.40702	1.24182	1.21384	1.11711	1.59472		46.746	1.10181	1.37734	1.37037	1.17288	1.2223	1.21536	1.33442	1.32633	1.16037	2.1657	1.44719	1.47337	1.52924	1.45988	1.64593
52.5	1.38104	1.09314	1.33722	1.51634	1.27429	1.32733	1.45618	1.23044	1.06466	1.45511	1.26806	1.32157	1.19911	1.53688	1.10262	1.46052	2.16295	1.40176	1.25345	1.20904	1.12716	1.64486		47.31	1.0964	1.41422	1.40208	1.21448	1.24836	1.21923	1.31414	1.32865	1.17338	2.19209	1.47599	1.4689	1.55429	1.47487	1.68324
53.125	1.38971	1.07961	1.34153	1.50774	1.25895	1.34096	1.48488	1.2501	1.06085	1.46758	1.24648	1.34396	1.19859	1.53522	1.08789	1.47434	2.15376	1.41057	1.26226	1.19078	1.13176	1.60908		47.873	1.11055	1.40006	1.41185	1.20506	1.24466	1.21191	1.31122	1.34155	1.19541	2.22165	1.44016	1.45486	1.55388	1.48845	1.6369
53.75	1.39439	1.08711	1.32764	1.48556	1.27328	1.34863	1.4795	1.25928	1.05602	1.49068	1.22437	1.37845	1.21139	1.55351	1.08315	1.48011	2.06915	1.4349	1.27219	1.16807	1.17255	1.54011		48.436	1.1218	1.38958	1.42568	1.21007	1.24554	1.21296	1.30012	1.35409	1.17355	2.19646	1.43074	1.46476	1.54891	1.49892	1.60018
54.375	1.38734	1.10758	1.32613	1.49091	1.30163	1.29862	1.44594	1.27093	1.05952	1.5133	1.25375	1.3692	1.22355	1.59445	1.07229	1.49754	2.00657	1.47563	1.286	1.17784	1.15833	1.49225		48.999	1.09048	1.39798	1.40455	1.23787	1.24332	1.21564	1.35351	1.36966	1.18882	2.22371	1.44682	1.49555	1.55909	1.51387	1.59827
55	1.39481	1.10375	1.33314	1.45684	1.30569	1.3068	1.45092	1.23134	1.07772	1.52802	1.28733	1.38895	1.21996	1.64796	1.0742	1.5108	2.10129	1.47244	1.28666	1.18067	1.13782	1.48155		49.562	1.09876	1.39065	1.42594	1.21938	1.23294	1.22198	1.36122	1.3678	1.19263	2.227	1.44987	1.52765	1.56073	1.50463	1.59736
55.625	1.43823	1.09666	1.35404	1.47666	1.27647	1.31061	1.44293	1.20556	1.08679	1.51838	1.28214	1.3971	1.21636	1.65231	1.09037	1.48803	2.17484	1.41457	1.28202	1.17948	1.13321	1.5309		50.126	1.11235	1.39134	1.43122	1.22797	1.26401	1.21274	1.34806	1.37938	1.18517	2.26775	1.44582	1.55041	1.58075	1.50816	1.65302
56.25	1.43985	1.09166	1.36181	1.46604	1.25349	1.31945	1.41383	1.19356	1.07743	1.50029	1.25145	1.35109	1.22075	1.65419	1.08301	1.46805	2.26356	1.37352	1.2919	1.20408	1.14487	1.56651		50.689	1.11569	1.39026	1.43542	1.21528	1.27723	1.22678	1.3156	1.39503	1.17994	2.2906	1.45297	1.57769	1.61465	1.5487	1.67711
56.875	1.42409	1.09149	1.36065	1.48638	1.24284	1.34618	1.39464	1.17763	1.08204	1.49817	1.23938	1.35007	1.22422	1.62124	1.12106	1.44774	2.44549	1.36605	1.28188	1.20719	1.14523	1.56503		51.252	1.11774	1.36788	1.44732	1.22291	1.28079	1.22545	1.30006	1.38009	1.17196	2.2695	1.41938	1.57955	1.64547	1.56971	1.70888
57.5	1.39752	1.08462	1.36301	1.45752	1.24637	1.3696	1.39121	1.19391	1.08152	1.50837	1.2749	1.34042	1.22524	1.64023	1.1074	1.42379	2.34885	1.37795	1.26866	1.21147	1.1576	1.56043		51.815	1.12505	1.38921	1.43838	1.23129	1.30119	1.22202	1.30973	1.38381	1.18313	2.24364	1.39616	1.56665	1.69441	1.577	1.73194
58.125	1.40541	1.08694	1.37186	1.45998	1.23903	1.36919	1.37148	1.1942	1.06667	1.53432	1.31151	1.36993	1.23118	1.65882	1.10033	1.39887	2.25573	1.41234	1.26828	1.18904	1.15088	1.59418		52.379	1.10615	1.38274	1.45235	1.24223	1.30271	1.23297	1.29693	1.39646	1.18619	2.2645	1.40621	1.57361	1.75395	1.60414	1.75367
58.75	1.37946	1.09238	1.38172	1.46801	1.2548	1.40837	1.38074	1.18335	1.06096	1.55962	1.29889	1.43324	1.23763	1.67482	1.09781	1.39272	2.25806	1.46427	1.27964	1.17755	1.1422	1.60571		52.942	1.09072	1.38079	1.46898	1.20977	1.30729	1.23815	1.32008	1.39532	1.1658	2.2753	1.39018	1.56122	1.78955	1.63247	1.77753
59.375	1.37389	1.08723	1.39123	1.46712	1.27663	1.44923	1.36212	1.19103	1.0704	1.57022	1.27243	1.47512	1.23106	1.73502	1.08212	1.40841	2.34553	1.52182	1.29114	1.1955	1.12315	1.67985		53.505	1.08477	1.39199	1.46969	1.22005	1.31995	1.24314	1.29665	1.37727	1.19275	2.26625	1.38048	1.53372	1.79995	1.61071	1.76054
60	1.39446	1.08417	1.3957	1.47908	1.31962	1.47708	1.39957	1.18669	1.07476	1.56463	1.27524	1.50697	1.2255	1.79981	1.0946	1.43131	2.33734	1.53857	1.28244	1.20878	1.13777	1.63269		54.068	1.10327	1.4122	1.48017	1.22086	1.32277	1.23823	1.30321	1.36685	1.19693	2.21323	1.37889	1.5415	1.79199	1.61875	1.75021
60.625	1.41302	1.08538	1.38266	1.48277	1.34415	1.50425	1.46756	1.18622	1.06349	1.55079	1.26553	1.49434	1.23233	1.82438	1.10836	1.43914	2.31815	1.51484	1.26798	1.21195	1.17292	1.64284		54.631	1.11086	1.40031	1.49247	1.22293	1.33626	1.22656	1.3182	1.38593	1.22304	2.20628	1.39556	1.55393	1.79625	1.62413	1.73332
61.25	1.4251	1.09977	1.38227	1.47721	1.3082	1.52481	1.45451	1.19649	1.06299	1.54771	1.28197	1.49048	1.2372	1.80199	1.09963	1.43516	2.19447	1.48739	1.27129	1.21085	1.17308	1.62033		55.195	1.09729	1.42319	1.50281	1.21675	1.33925	1.23228	1.32045	1.3911	1.17053	2.27054	1.4033	1.57109	1.80761	1.65188	1.69257
61.875	1.45123	1.10344	1.37729	1.49687	1.28703	1.51696	1.4164	1.21909	1.05004	1.58806	1.30516	1.48695	1.23922	1.7242	1.09709	1.44575	2.20684	1.46169	1.28149	1.21434	1.17817	1.60315		55.758	1.10878	1.44138	1.512	1.21404	1.32852	1.24629	1.30607	1.38808	1.14976	2.32833	1.44028	1.58631	1.82685	1.67595	1.71431
62.5	1.43752	1.09614	1.36105	1.52871	1.29564	1.52916	1.39522	1.22607	1.03139	1.65242	1.32377	1.45494	1.23047	1.64962	1.1212	1.46652	2.2933	1.44672	1.29943	1.20644	1.17053	1.63736		56.321	1.13389	1.41466	1.51124	1.2347	1.34133	1.25898	1.32559	1.39892	1.14587	2.37912	1.41801	1.59566	1.83482	1.72926	1.72519
63.125	1.4384	1.10386	1.35651	1.52609	1.31124	1.54815	1.38847	1.23757	1.00327	1.67216	1.32005	1.4561	1.23887	1.60567	1.13863	1.49615	2.41294	1.4374	1.31175	1.20634	1.17104	1.57733		56.884	1.13527	1.42141	1.52002	1.22941	1.37976	1.26586	1.30931	1.40221	1.16621	2.4152	1.4189	1.59512	1.84324	1.72207	1.74536
63.75	1.43697	1.10676	1.34483	1.49241	1.3136	1.55361	1.42153	1.24326	0.999385	1.6743	1.32603	1.44945	1.24952	1.59835	1.11977	1.50552	2.43925	1.43373	1.3322	1.21234	1.17715	1.5694		57.447	1.11684	1.41104	1.51487	1.22318	1.38336	1.25461	1.34274	1.37854	1.15703	2.42367	1.43648	1.61441	1.85799	1.73335	1.79068
64.375	1.4476	1.11278	1.32633	1.52231	1.34455	1.56083	1.4392	1.2456	1.00507	1.70847	1.30864	1.42226	1.25306	1.58716	1.0968	1.52116	2.379	1.43933	1.32579	1.22994	1.16514	1.58539		58.011	1.12589	1.42169	1.52141	1.25017	1.38117	1.24832	1.34604	1.37822	1.15973	2.36215	1.43808	1.61218	1.87915	1.71885	1.77211
65	1.45222	1.11716	1.29754	1.43584	1.36942	1.56237	1.4348	1.24677	1.01146	1.78812	1.29016	1.42231	1.26323	1.59671	1.08292	1.52738	2.29989	1.44346	1.32523	1.22595	1.17978	1.55953		58.574	1.13279	1.42971	1.52666	1.23756	1.36204	1.25526	1.32333	1.38962	1.18885	2.36904	1.4396	1.5792	1.90018	1.73674	1.77266
65.625	1.43218	1.12003	1.27958	1.42768	1.38937	1.5413	1.4226	1.25981	1.02215	1.8463	1.28926	1.44276	1.25306	1.61887	1.06682	1.52342	2.26553	1.46384	1.32294	1.23134	1.18615	1.55066		59.137	1.14228	1.41206	1.51819	1.24229	1.3546	1.27624	1.32718	1.39364	1.18231	2.43736	1.44882	1.59719	1.90602	1.75751	1.81667
66.25	1.4138	1.11691	1.2615	1.4158	1.40762	1.54093	1.40443	1.26823	1.02628	1.84328	1.30423	1.42756	1.23988	1.6272	1.07355	1.52212	2.25621	1.49458	1.3193	1.20975	1.19326	1.5505		59.7	1.12278	1.4124	1.5047	1.23635	1.32226	1.28663	1.30925	1.39042	1.16358	2.49402	1.4386	1.60858	1.9106	1.76988	1.8462
66.875	1.4208	1.11301	1.25219	1.40699	1.39862	1.51443	1.38568	1.28961	1.02638	1.82444	1.31564	1.4099	1.22224	1.6438	1.08282	1.50357	2.32557	1.512	1.33103	1.20873	1.19527	1.64079		60.263	1.11621	1.39995	1.51518	1.24623	1.32083	1.27907	1.30603	1.39237	1.15319	2.5365	1.44373	1.63033	1.91386	1.79532	1.8264
67.5	1.43409	1.10553	1.27573	1.41764	1.3648	1.47095	1.3604	1.32051	1.03408	1.786	1.29787	1.4086	1.23226	1.63968	1.09399	1.4849	2.40564	1.52677	1.33121	1.22999	1.20329	1.62816		60.827	1.12603	1.41711	1.52097	1.25284	1.30582	1.26682	1.30269	1.41109	1.14548	2.53224	1.43838	1.65318	1.89737	1.76508	1.77952
68.125	1.43902	1.12075	1.28895	1.40514	1.36668	1.4277	1.34809	1.3199	1.02143	1.76375	1.28893	1.39022	1.26232	1.64935	1.07004	1.47099	2.31472	1.54995	1.31511	1.22046	1.20402	1.57671		61.39	1.1343	1.3783	1.52067	1.26055	1.32649	1.26513	1.31562	1.42976	1.14448	2.44936	1.46893	1.69711	1.85349	1.75823	1.7697
68.75	1.433	1.13684	1.28936	1.40536	1.41835	1.38527	1.34804	1.31356	1.00737	1.78351	1.26058	1.3484	1.27632	1.66693	1.03511	1.48421	2.22054	1.56439	1.31115	1.22652	1.19294	1.51188		61.953	1.1261	1.39058	1.51075	1.25469	1.32132	1.26528	1.32977	1.44179	1.15165	2.41936	1.45676	1.71609	1.81856	1.73432	1.79191
69.375	1.46947	1.1348	1.30513	1.41663	1.45721	1.35859	1.30677	1.28766	0.999212	1.8455	1.25005	1.30533	1.27603	1.63052	1.02834	1.53039	2.11927	1.55924	1.32353	1.24148	1.1795	1.47666		62.516	1.12358	1.41143	1.53308	1.26926	1.34742	1.27264	1.3186	1.44654	1.14277	2.38208	1.4623	1.72423	1.77508	1.73948	1.74469
70	1.49665	1.11449	1.31981	1.38169	1.45568	1.33899	1.27604	1.26838	0.993491	1.93078	1.24342	1.26481	1.28345	1.6208	1.03002	1.56094	2.1547	1.56246	1.32249	1.23358	1.1907	1.49131		63.08	1.15202	1.41165	1.53909	1.2653	1.39019	1.28446	1.3443	1.42294	1.14178	2.3516	1.44178	1.71394	1.71783	1.7752	1.69161
70.625	1.50478	1.11796	1.3509	1.39669	1.39658	1.34689	1.25619	1.27805	1.01046	1.98856	1.25766	1.28093	1.28772	1.59867	1.03207	1.57993	2.18795	1.5732	1.32718	1.24125	1.17646	1.49096		63.643	1.13953	1.41867	1.53854	1.25985	1.39307	1.29426	1.33639	1.41965	1.13023	2.25837	1.46041	1.71844	1.67196	1.75863	1.66455
71.25	1.52044	1.11852	1.37425	1.42221	1.37751	1.39367	1.25275	1.30049	1.03654	2.02151	1.33144	1.32889	1.28186	1.59753	1.00432	1.5864	2.16024	1.5892	1.33733	1.23825	1.1569	1.46291		64.206	1.11741	1.40967	1.56407	1.26601	1.38222	1.30935	1.34813	1.4536	1.14172	2.27298	1.47805	1.73051	1.64711	1.79745	1.65824
71.875	1.5488	1.11019	1.40753	1.40461	1.3847	1.42612	1.26558	1.30371	1.0503	2.01013	1.34451	1.36729	1.27017	1.5784	1.00309	1.55923	2.16345	1.59634	1.35802	1.24457	1.16539	1.4685		64.769	1.12616	1.4292	1.58499	1.24511	1.41461	1.30905	1.34358	1.46003	1.11581	2.28504	1.47399	1.75034	1.62611	1.8155	1.6764
72.5	1.55971	1.12152	1.46485	1.36299	1.39933	1.43784	1.29369	1.2845	1.05529	1.97189	1.29016	1.33139	1.26612	1.55975	1.01624	1.53222	2.26907	1.60451	1.36294	1.26615	1.18937	1.45116		65.332	1.15327	1.40385	1.56448	1.24383	1.3914	1.31545	1.35725	1.4501	1.14668	2.32765	1.50604	1.74986	1.64617	1.83555	1.67598
73.125	1.57982	1.11763	1.57882	1.36207	1.39772	1.43922	1.32782	1.30546	1.05096	1.95306	1.25642	1.31946	1.26631	1.52599	1.03894	1.51676	2.43683	1.62842	1.35106	1.26782	1.18361	1.42485		65.896	1.15631	1.40467	1.56407	1.22105	1.39439	1.32903	1.36261	1.43361	1.1417	2.40698	1.51239	1.72578	1.67889	1.83035	1.68965
73.75	1.62486	1.11416	1.66838	1.39324	1.42253	1.39655	1.36307	1.33297	1.03087	1.93886	1.25117	1.32611	1.27795	1.4999	1.05548	1.50276	2.29063	1.63931	1.33744	1.25047	1.1611	1.4175		66.459	1.1674	1.39429	1.54507	1.23258	1.36815	1.31522	1.33944	1.41304	1.15204	2.44411	1.50091	1.69374	1.70414	1.83833	1.66334
74.375	1.59952	1.12606	1.77631	1.4305	1.45871	1.36816	1.39313	1.38833	1.01095	1.93642	1.24723	1.35759	1.2852	1.50054	1.07255	1.49474	2.22005	1.61051	1.32035	1.26058	1.14349	1.49466		67.022	1.12659	1.40983	1.57097	1.25628	1.36287	1.31424	1.33696	1.43475	1.14371	2.52664	1.50159	1.69153	1.72277	1.82502	1.69173
75	1.52781	1.12902	1.79997	1.4079	1.43273	1.36501	1.36128	1.426	1.00221	1.95722	1.26196	1.3384	1.29082	1.52466	1.07328	1.46372	2.18344	1.54951	1.30475	1.24102	1.13563	1.53474		67.585	1.1213	1.43807	1.54869	1.23785	1.38254	1.30209	1.37252	1.4417	1.13547	2.49694	1.48642	1.70554	1.73579	1.80829	1.68865
75.625	1.49153	1.12818	1.71879	1.37338	1.40371	1.37728	1.34192	1.42104	1.00374	1.9327	1.25022	1.34297	1.29878	1.50845	1.08758	1.39523	2.25675	1.47737	1.30586	1.21082	1.1483	1.49513		68.148	1.12085	1.42908	1.53636	1.23316	1.38833	1.30398	1.37642	1.41879	1.1464	2.46375	1.516	1.70422	1.74831	1.81604	1.67188
76.25	1.48907	1.14317	1.65488	1.34946	1.37323	1.37262	1.3422	1.40233	1.00593	1.86699	1.24065	1.34146	1.29094	1.5022	1.10772	1.35402	2.23714	1.42766	1.30587	1.20621	1.15301	1.52511		68.712	1.11725	1.45246	1.55008	1.23937	1.37904	1.30149	1.37727	1.39971	1.14522	2.42124	1.52899	1.69611	1.74293	1.78079	1.66706
76.875	1.4518	1.1497	1.63735	1.3591	1.39195	1.37933	1.36078	1.39995	1.00876	1.81336	1.26301	1.36536	1.28839	1.48587	1.07506	1.35202	2.14435	1.40694	1.29958	1.21502	1.17597	1.56873		69.275	1.11436	1.47387	1.52489	1.24056	1.3854	1.29901	1.34276	1.40405	1.14445	2.34682	1.51037	1.66328	1.74369	1.77323	1.66135
77.5	1.45767	1.13805	1.72095	1.35662	1.3884	1.38887	1.36336	1.41429	1.01518	1.78233	1.28276	1.38693	1.27682	1.47343	1.05106	1.36726	2.06877	1.41261	1.29909	1.25463	1.18933	1.61562		69.838	1.10331	1.47613	1.52821	1.24846	1.42217	1.31195	1.33364	1.41029	1.12893	2.28487	1.48129	1.66948	1.7231	1.76678	1.64706
78.125	1.45632	1.12326	1.79055	1.31607	1.37834	1.40258	1.36309	1.43889	1.01676	1.75936	1.28187	1.41755	1.26641	1.44832	1.04389	1.38828	2.05741	1.41963	1.30218	1.24962	1.16472	1.61188		70.401	1.10568	1.47116	1.52793	1.28375	1.3871	1.31295	1.36514	1.41602	1.13502	2.28852	1.47928	1.70066	1.71602	1.74371	1.63154
78.75	1.4493	1.11803	1.769	1.33188	1.38153	1.4087	1.35054	1.47239	1.01117	1.75516	1.29113	1.48885	1.27701	1.42838	1.04388	1.39443	2.13866	1.4439	1.29627	1.23276	1.15585	1.56363		70.964	1.11851	1.49743	1.52158	1.26566	1.3589	1.31079	1.36267	1.41499	1.16378	2.34712	1.47095	1.74761	1.71658	1.71838	1.64209
79.375	1.48319	1.10906	1.70646	1.3155	1.35064	1.42283	1.36923	1.47685	1.00279	1.77167	1.29154	1.57666	1.29706	1.45143	1.03591	1.38719	2.28285	1.45872	1.29221	1.22986	1.16077	1.51432		71.528	1.12656	1.47489	1.53924	1.25557	1.31599	1.30361	1.35153	1.39993	1.15605	2.34034	1.49595	1.78961	1.71846	1.75096	1.6457
80	1.49818	1.11613	1.66617	1.32214	1.34685	1.45613	1.4103	1.47116	1.00249	1.76987	1.29144	1.57327	1.28783	1.4602	1.05233	1.36576	2.54171	1.45264	1.29131	1.23773	1.16824	1.51521		72.091	1.15608	1.45483	1.57208	1.23994	1.31239	1.30079	1.35214	1.40975	1.15979	2.34583	1.53232	1.77789	1.72289	1.71969	1.6478
80.625	1.51842	1.12199	1.64148	1.34408	1.35753	1.4539	1.41096	1.4578	1.00591	1.75904	1.28834	1.46389	1.26707	1.46507	1.03146	1.33442	2.58309	1.44088	1.311	1.23262	1.16451	1.51728		72.654	1.15652	1.43417	1.5709	1.25849	1.30476	1.29721	1.3411	1.39326	1.18722	2.31482	1.52091	1.74977	1.73649	1.70697	1.66797
81.25	1.5176	1.11931	1.62138	1.33494	1.35549	1.43831	1.39711	1.45107	1.01204	1.7285	1.25986	1.38789	1.27269	1.47901	1.02003	1.30794	2.35116	1.45666	1.32328	1.23483	1.15937	1.50192		73.217	1.16842	1.45524	1.56958	1.25173	1.30886	1.27943	1.34831	1.36864	1.21903	2.27493	1.55338	1.72008	1.75932	1.71587	1.67866
81.875	1.50175	1.12541	1.61014	1.31707	1.34573	1.41158	1.37737	1.45759	1.00705	1.705	1.23508	1.37977	1.28498	1.50436	1.01999	1.30194	2.31408	1.4776	1.33996	1.25517	1.1633	1.51455		73.781	1.18439	1.4563	1.56036	1.27246	1.32899	1.2684	1.3378	1.36969	1.16919	2.16085	1.55869	1.69	1.7848	1.73358	1.66899
82.5	1.4577	1.13542	1.65306	1.31884	1.358	1.3997	1.36738	1.46205	1.00423	1.71122	1.24658	1.36186	1.2915	1.57579	1.0437	1.28937	2.16201	1.50057	1.33949	1.25974	1.13703	1.51606		74.344	1.20431	1.46299	1.58622	1.26582	1.32894	1.27123	1.34447	1.37893	1.18044	2.11945	1.54539	1.67754	1.8145	1.745	1.68683
83.125	1.45337	1.1344	1.73045	1.34343	1.35662	1.42471	1.37468	1.46624	1.01987	1.72922	1.25062	1.34409	1.30585	1.58371	1.04438	1.28731	2.14998	1.5178	1.32798	1.26349	1.16593	1.53795		74.907	1.1781	1.4774	1.56575	1.25668	1.32555	1.27374	1.35103	1.37513	1.20753	2.12655	1.55944	1.64292	1.82587	1.74632	1.68479
83.75	1.43439	1.13743	1.74819	1.37375	1.34849	1.42932	1.37812	1.46171	1.03476	1.7281	1.24688	1.34858	1.32896	1.54239	1.04344	1.28823	2.02541	1.54189	1.31946	1.27895	1.20381	1.54826		75.47	1.1996	1.49176	1.5377	1.26038	1.34332	1.26258	1.34821	1.37723	1.21375	2.10283	1.56467	1.62549	1.84578	1.74298	1.71241
84.375	1.42188	1.12752	1.66473	1.36576	1.35996	1.44444	1.40547	1.44877	1.02703	1.72283	1.24991	1.36041	1.34868	1.5113	1.04188	1.29246	1.9247	1.58106	1.32887	1.30051	1.22584	1.53678		76.033	1.19164	1.50972	1.50728	1.24859	1.32398	1.25378	1.34377	1.38715	1.18582	2.1038	1.56909	1.63712	1.86427	1.75473	1.65347
85	1.44913	1.12848	1.58997	1.38802	1.34887	1.44596	1.4652	1.43817	1.02319	1.7182	1.24661	1.33426	1.35333	1.50914	1.03278	1.30607	1.87056	1.61006	1.34703	1.3247	1.21208	1.53148		76.597	1.18867	1.51499	1.50384	1.28198	1.33458	1.26795	1.29507	1.37829	1.16368	2.08239	1.58372	1.64048	1.89602	1.76532	1.65548
85.625	1.50657	1.1348	1.60097	1.3978	1.35305	1.46768	1.47331	1.44042	1.02438	1.72942	1.22872	1.28963	1.35359	1.49844	1.02357	1.35444	1.85227	1.60142	1.34779	1.29135	1.21394	1.54331		77.16	1.18687	1.51367	1.51824	1.27583	1.3396	1.27121	1.29444	1.3924	1.19937	2.04833	1.55692	1.63298	1.9294	1.77511	1.64854
86.25	1.48833	1.14165	1.61357	1.32904	1.3629	1.45333	1.40912	1.46061	1.02388	1.7422	1.21997	1.25945	1.35409	1.48593	1.03343	1.36859	1.8513	1.56889	1.33428	1.26933	1.22904	1.52548		77.723	1.18757	1.4993	1.52348	1.26203	1.34035	1.26577	1.29409	1.43012	1.18265	2.10333	1.56661	1.62193	1.94001	1.80009	1.64419
86.875	1.48378	1.12752	1.60049	1.29742	1.38675	1.46147	1.36181	1.46837	1.03501	1.73097	1.22023	1.22138	1.36864	1.44329	1.03706	1.37009	1.85157	1.53953	1.3182	1.25077	1.20966	1.50963		78.286	1.18792	1.49702	1.50708	1.26535	1.35404	1.25401	1.31419	1.42759	1.22148	2.13468	1.60221	1.61349	1.93145	1.82638	1.65467
87.5	1.47829	1.12187	1.52963	1.30722	1.37144	1.48594	1.34584	1.50195	1.06307	1.71582	1.22192	1.21279	1.36674	1.43136	1.02263	1.37495	1.8989	1.54655	1.31373	1.246	1.21562	1.55006		78.849	1.1953	1.51921	1.53402	1.27091	1.36279	1.25749	1.35382	1.42964	1.22993	2.13579	1.59617	1.61036	1.91667	1.84672	1.67308
88.125	1.46059	1.13319	1.49043	1.35042	1.36807	1.52167	1.341	1.52071	1.08312	1.71028	1.22354	1.20399	1.37095	1.43654	1.01523	1.36481	1.96312	1.55861	1.32452	1.2774	1.23766	1.51424		79.413	1.20718	1.55296	1.51742	1.24901	1.35375	1.2538	1.34085	1.44295	1.25411	2.20339	1.61047	1.62536	1.91605	1.8229	1.66277
88.75	1.41432	1.14024	1.49384	1.35557	1.41462	1.53554	1.35291	1.53853	1.09356	1.71886	1.22376	1.19961	1.38299	1.4284	1.02426	1.3371	1.9644	1.58499	1.3403	1.28181	1.2309	1.48503		79.976	1.19399	1.49551	1.50714	1.25609	1.35577	1.24534	1.35199	1.42955	1.23488	2.24662	1.62826	1.65304	1.91576	1.87861	1.68364
89.375	1.38144	1.14005	1.51781	1.35355	1.46945	1.57448	1.35276	1.57324	1.08799	1.75025	1.21309	1.2235	1.39303	1.41741	1.036	1.31341	1.90679	1.60897	1.35813	1.29133	1.24339	1.49403		80.539	1.21122	1.50304	1.50924	1.25686	1.32615	1.23759	1.32699	1.43682	1.21928	2.34425	1.64591	1.68071	1.90341	1.86766	1.6981
90	1.35035	1.13303	1.54339	1.37555	1.46382	1.55733	1.3579	1.58222	1.06438	1.79076	1.21957	1.20827	1.36517	1.40471	1.03295	1.27502	1.94576	1.59811	1.33476	1.27909	1.20216	1.49522		81.102	1.22475	1.52578	1.54328	1.25297	1.33038	1.25772	1.33281	1.43736	1.2019	2.4778	1.68705	1.69738	1.88735	1.85565	1.69699
90.625	1.36352	1.1368	1.57445	1.40758	1.48268	1.54451	1.36634	1.59106	1.04638	1.78747	1.24497	1.20598	1.32861	1.39377	1.0204	1.25215	2.0208	1.57798	1.32955	1.28005	1.197	1.53929		81.665	1.2106	1.51905	1.51566	1.24323	1.34031	1.26333	1.30205	1.43822	1.2545	2.58493	1.66362	1.71391	1.88465	1.84909	1.70821
91.25	1.34933	1.13718	1.62626	1.38046	1.46848	1.5627	1.38021	1.60461	1.04147	1.75979	1.25703	1.23508	1.29738	1.41249	1.02281	1.24451	1.96112	1.55688	1.34256	1.28589	1.20346	1.55209		82.229	1.19751	1.47868	1.51712	1.24014	1.35313	1.2531	1.33513	1.42401	1.25111	2.45336	1.63228	1.73449	1.89292	1.84383	1.75046
91.875	1.33488	1.1483	1.61216	1.37222	1.45721	1.55807	1.40061	1.62906	1.05422	1.7489	1.24377	1.21324	1.2856	1.41704	1.04902	1.24067	1.89691	1.50688	1.35089	1.26825	1.21829	1.55305		82.792	1.19726	1.47066	1.51053	1.24196	1.37234	1.26376	1.35254	1.42255	1.25034	2.30709	1.64759	1.75911	1.88543	1.84912	1.7576
92.5	1.31104	1.16283	1.52188	1.34115	1.49843	1.56924	1.39464	1.63506	1.05602	1.77063	1.24694	1.20185	1.30753	1.39299	1.04886	1.23339	1.91427	1.4838	1.35362	1.26146	1.19762	1.5114		83.355	1.2149	1.47895	1.54848	1.25065	1.37296	1.28698	1.35061	1.4231	1.22506	2.21524	1.64141	1.76691	1.91922	1.85648	1.77026
93.125	1.28815	1.16879	1.46829	1.3496	1.5672	1.58351	1.39633	1.66102	1.04991	1.80449	1.25968	1.19249	1.34205	1.40581	1.03118	1.21531	2.00088	1.47257	1.36301	1.26568	1.19767	1.48106		83.918	1.22369	1.51864	1.54247	1.25878	1.37308	1.30081	1.34577	1.42224	1.24481	2.14052	1.62804	1.79682	1.99632	1.87123	1.77365
93.75	1.29803	1.1443	1.47836	1.37492	1.57626	1.58075	1.41805	1.66134	1.04529	1.84154	1.27682	1.19593	1.36063	1.3952	1.04406	1.21497	1.99261	1.47487	1.33918	1.22971	1.18593	1.47882		84.481	1.23958	1.52395	1.51543	1.22922	1.36661	1.3043	1.33435	1.42473	1.23052	2.11757	1.59268	1.84844	2.05674	1.85545	1.74693
94.375	1.31435	1.13439	1.49436	1.38696	1.58864	1.55353	1.4363	1.62696	1.04927	1.8747	1.29379	1.20723	1.36532	1.37933	1.03345	1.22745	1.92157	1.46796	1.32299	1.22452	1.18604	1.52798		85.045	1.24538	1.54779	1.52347	1.24398	1.39367	1.29862	1.33212	1.42796	1.218	2.12866	1.59086	1.90077	2.09604	1.86781	1.71645
95	1.32687	1.15936	1.47008	1.37361	1.58008	1.5743	1.44326	1.62176	1.04485	1.89437	1.28322	1.23734	1.36156	1.35984	1.04856	1.25009	1.93869	1.47001	1.33738	1.22056	1.18065	1.50946		85.608	1.23539	1.54999	1.51234	1.24265	1.43282	1.30284	1.35136	1.44118	1.20034	2.18723	1.61981	1.93976	2.13002	1.85062	1.78043
95.625	1.35442	1.17645	1.41943	1.39494	1.50191	1.60573	1.42078	1.61132	1.03414	1.90292	1.28644	1.25314	1.32721	1.36874	1.07517	1.23582	2.0415	1.49671	1.34602	1.24589	1.19155	1.59415		86.171	1.19811	1.53646	1.51769	1.25142	1.41779	1.30817	1.34741	1.43191	1.2038	2.2287	1.59469	1.92558	2.08131	1.8366	1.83241
96.25	1.38417	1.16691	1.39022	1.36306	1.51386	1.57421	1.40925	1.58811	1.0423	1.88996	1.28189	1.23726	1.29897	1.35636	1.08347	1.20096	2.08604	1.5285	1.3512	1.26969	1.20364	1.639		86.734	1.1986	1.56229	1.52213	1.24213	1.40097	1.30635	1.32388	1.41888	1.19322	2.29985	1.56019	1.90848	2.00565	1.82862	1.84365
96.875	1.39277	1.15531	1.37599	1.35679	1.54993	1.56752	1.41443	1.59216	1.05307	1.89246	1.29158	1.23081	1.28369	1.35022	1.10001	1.16933	2.09779	1.5478	1.36035	1.26846	1.19353	1.60017		87.298	1.1798	1.53433	1.51776	1.23854	1.41002	1.29477	1.3587	1.40741	1.20351	2.27736	1.57978	1.91221	1.95924	1.90284	1.79451
97.5	1.38873	1.15243	1.39578	1.39031	1.61307	1.59393	1.41513	1.60663	1.04846	1.93304	1.29521	1.22707	1.27587	1.37865	1.09621	1.1631	2.09398	1.54615	1.36814	1.28792	1.17885	1.59217		87.861	1.18524	1.53949	1.52256	1.24296	1.3733	1.29348	1.37745	1.40652	1.2193	2.31178	1.63919	1.87537	1.94247	1.90834	1.78971
98.125	1.3574	1.15218	1.43115	1.41642	1.66967	1.61625	1.4259	1.63523	1.03879	1.93207	1.28576	1.23456	1.27287	1.37552	1.08507	1.16446	2.1655	1.51698	1.35701	1.29185	1.16416	1.54425		88.424	1.19738	1.55588	1.56901	1.24081	1.37855	1.29858	1.38906	1.40248	1.22791	2.30887	1.57327	1.83278	1.9305	1.8777	1.7833
98.75	1.35016	1.15099	1.46729	1.45082	1.56756	1.55194	1.42372	1.64567	1.03781	1.90528	1.26363	1.23465	1.26822	1.35007	1.06642	1.16129	2.09963	1.48725	1.38534	1.31556	1.17784	1.53536		88.987	1.22957	1.55252	1.54703	1.27587	1.36075	1.30074	1.36827	1.39755	1.229	2.30692	1.57104	1.78693	1.94705	1.86675	1.77178
99.375	1.3626	1.14503	1.47249	1.53116	1.45291	1.51706	1.40282	1.65233	1.04376	1.9217	1.2519	1.22948	1.29847	1.33057	1.05039	1.17957	2.02437	1.46882	1.41296	1.3631	1.15234	1.57938		89.55	1.26128	1.54067	1.53905	1.3057	1.36757	1.30415	1.36763	1.38867	1.21543	2.34286	1.57005	1.75228	1.99016	1.87264	1.79577
100	1.41346	1.14804	1.46925	1.74506	1.42273	1.51462	1.39856	1.64693	1.04986	1.94287	1.24778	1.22576	1.32799	1.31603	1.05615	1.18734	1.99193	1.4684	1.36412	1.3969	1.16996	1.61094		90.114	1.25842	1.55114	1.55275	1.29157	1.354	1.30997	1.4006	1.39158	1.20351	2.29275	1.52729	1.75606	2.03266	1.87421	1.84864
100.625	1.46815	1.14561	1.44216	2.02697	1.39331	1.5381	1.40394	1.66629	1.05622	1.90861	1.24479	1.20671	1.32922	1.29816	1.04919	1.16449	1.99957	1.47055	1.32953	1.38428	1.22401	1.58569		90.677	1.27754	1.55484	1.57197	1.27767	1.33856	1.31079	1.41186	1.40688	1.22407	2.27664	1.51682	1.76961	2.06143	1.87806	1.89956
101.25	1.46932	1.15156	1.40593	2.09251	1.39922	1.52476	1.40653	1.7416	1.05053	1.86123	1.22302	1.20171	1.31755	1.31443	1.05668	1.13412	2.03453	1.46047	1.33306	1.36594	1.22365	1.54515		91.24	1.24987	1.54125	1.60379	1.26011	1.35824	1.30445	1.36919	1.41904	1.24015	2.29034	1.50178	1.78149	2.06291	1.92677	1.9683
101.875	1.46956	1.15405	1.39304	1.92451	1.40035	1.52245	1.40464	1.81141	1.04964	1.81464	1.21205	1.18895	1.29193	1.35626	1.08455	1.09785	1.98053	1.45857	1.34336	1.36427	1.20809	1.56689		91.803	1.24428	1.51555	1.57653	1.28031	1.37124	1.30333	1.35397	1.41579	1.26717	2.30747	1.50499	1.80707	2.05838	1.88136	1.99077
102.5	1.47037	1.14531	1.382	1.66577	1.37525	1.50607	1.40954	1.80404	1.054	1.77485	1.22325	1.16993	1.27116	1.36555	1.07799	1.0663	1.88934	1.46612	1.33582	1.34949	1.22723	1.61084		92.366	1.26687	1.52808	1.58285	1.25142	1.41179	1.30398	1.36709	1.42485	1.23735	2.25825	1.56144	1.83863	2.05906	1.89714	2.00185
103.125	1.46943	1.14371	1.41422	1.61094	1.33784	1.48289	1.4119	1.74874	1.07156	1.76681	1.22654	1.19842	1.27114	1.32407	1.07158	1.05158	1.89885	1.49935	1.35241	1.34401	1.25975	1.64087		92.93	1.27981	1.55305	1.56785	1.26386	1.41233	1.30126	1.34611	1.41506	1.20889	2.15628	1.56716	1.85764	2.03261	1.90763	1.96015
103.75	1.44815	1.14989	1.46047	1.57713	1.33527	1.47775	1.44872	1.70621	1.10006	1.75923	1.21739	1.22403	1.28453	1.31331	1.06478	1.05221	1.85224	1.54925	1.36197	1.38866	1.28079	1.64291		93.493	1.27587	1.58207	1.56041	1.25211	1.40083	1.31164	1.33542	1.40289	1.22127	2.11654	1.60164	1.85876	1.98743	1.97115	1.91868
104.375	1.42439	1.15811	1.48286	1.53945	1.29617	1.50507	1.43142	1.71525	1.09779	1.76518	1.21472	1.25619	1.2932	1.34033	1.0735	1.06713	1.80604	1.56555	1.37451	1.39818	1.30926	1.6746		94.056	1.26252	1.61774	1.55513	1.24652	1.33501	1.31355	1.35664	1.41874	1.24417	2.08456	1.63009	1.83109	1.93082	2.07533	1.8475
105	1.40151	1.17591	1.46934	1.49378	1.27763	1.52033	1.42061	1.72991	1.07547	1.78862	1.24007	1.27204	1.28874	1.36279	1.06521	1.09511	1.81147	1.59071	1.37296	1.39044	1.34989	1.62092		94.619	1.28304	1.59114	1.55552	1.26533	1.3535	1.31257	1.37407	1.43305	1.24019	2.09787	1.6489	1.84346	1.90046	2.08722	1.81945
105.625	1.37505	1.18213	1.45918	1.43987	1.27677	1.56682	1.41249	1.71311	1.07793	1.81166	1.26695	1.29909	1.28713	1.35218	1.04422	1.12754	1.87822	1.63888	1.3784	1.38599	1.35568	1.55444		95.182	1.28402	1.59072	1.59037	1.28044	1.33572	1.31706	1.38387	1.45131	1.24151	2.09739	1.66174	1.83555	1.8871	2.01569	1.78678
106.25	1.37753	1.18426	1.42876	1.42399	1.28041	1.59294	1.41762	1.68014	1.10048	1.80286	1.27593	1.30225	1.28722	1.35016	1.04184	1.15645	2.0101	1.68781	1.38747	1.36865	1.33988	1.54101		95.746	1.282	1.5895	1.60423	1.28992	1.30125	1.33152	1.37554	1.45628	1.20618	2.04717	1.58642	1.81272	1.87713	1.95701	1.75205
106.875	1.38256	1.1739	1.40794	1.46547	1.28753	1.61687	1.43365	1.68469	1.1003	1.78966	1.2869	1.32002	1.27074	1.31749	1.04015	1.14408	2.18517	1.72391	1.37212	1.37147	1.29395	1.52972		96.309	1.30486	1.5886	1.59675	1.27058	1.3106	1.32008	1.34573	1.45567	1.23733	2.00232	1.58154	1.83223	1.865	1.97306	1.77585
107.5	1.41469	1.15404	1.37807	1.44937	1.36214	1.64944	1.43644	1.71323	1.0842	1.77437	1.27488	1.30005	1.25219	1.29322	1.04681	1.11227	2.32542	1.71119	1.37203	1.36492	1.35029	1.51297		96.872	1.25201	1.61262	1.58695	1.27168	1.26645	1.31259	1.35769	1.45966	1.20912	1.97702	1.57933	1.84196	1.85554	1.9309	1.80827
108.125	1.47589	1.14992	1.36865	1.41502	1.49069	1.6801	1.43049	1.70761	1.07039	1.76548	1.28374	1.27592	1.23749	1.30467	1.08593	1.10624	2.50728	1.65919	1.35746	1.35124	1.34144	1.54163		97.435	1.22347	1.61522	1.59597	1.2702	1.2652	1.31248	1.35105	1.45492	1.1937	1.96356	1.56557	1.86279	1.84615	1.96421	1.81495
108.75	1.59026	1.14994	1.3719	1.39582	1.49066	1.6688	1.4359	1.71166	1.07034	1.77438	1.28235	1.24436	1.23659	1.32155	1.11105	1.13292	2.41936	1.5825	1.35459	1.34485	1.32751	1.54791		97.999	1.20699	1.60622	1.57638	1.27544	1.25567	1.31589	1.32737	1.47018	1.17112	1.96573	1.57574	1.8765	1.83018	1.94562	1.77686
109.375	1.66411	1.17674	1.37483	1.38276	1.36644	1.67442	1.43466	1.77181	1.08804	1.8254	1.26695	1.20159	1.24433	1.31727	1.14308	1.19178	2.11638	1.5247	1.37264	1.31729	1.36774	1.53179		98.562	1.20878	1.61675	1.58631	1.28794	1.26394	1.32978	1.34089	1.475	1.18455	1.9851	1.59175	1.89445	1.82583	1.86158	1.78109
110	1.66644	1.18314	1.38626	1.40294	1.34743	1.61779	1.42352	1.84512	1.0982	1.86571	1.26231	1.18679	1.27054	1.34364	1.16221	1.21661	1.95986	1.49184	1.38784	1.33818	1.42002	1.52241		99.125	1.21885	1.6141	1.59688	1.34004	1.25876	1.32486	1.31011	1.47951	1.19999	2.01871	1.62333	1.92205	1.82687	1.87372	1.807
110.625	1.63773	1.18604	1.42043	1.42103	1.33479	1.60001	1.40234	1.84683	1.09492	1.82693	1.286	1.1871	1.32047	1.3874	1.16499	1.19316	1.86708	1.47155	1.38621	1.36385	1.42896	1.56799		99.688	1.21787	1.58831	1.60492	1.35686	1.25079	1.33238	1.38248	1.48426	1.19261	2.00419	1.58867	1.92537	1.81037	1.90605	1.81413
111.25	1.56211	1.17492	1.44891	1.435	1.32581	1.61323	1.38041	1.82082	1.07907	1.77678	1.31173	1.17695	1.3598	1.44178	1.15173	1.15094	1.92259	1.40985	1.36793	1.3943	1.3677	1.60171		100.251	1.22339	1.61348	1.61944	1.31875	1.23974	1.34927	1.40041	1.46191	1.22569	2.06579	1.54194	1.9226	1.81626	1.92283	1.80965
111.875	1.49547	1.16879	1.45068	1.45078	1.29381	1.55265	1.43059	1.78079	1.06339	1.73904	1.31836	1.1746	1.37261	1.44326	1.12127	1.13218	1.98438	1.3631	1.35232	1.41757	1.30769	1.65399		100.815	1.21741	1.63353	1.62602	1.29647	1.27093	1.35068	1.4013	1.43271	1.23439	2.08428	1.5098	1.89109	1.86658	1.92952	1.84864
112.5	1.48335	1.15914	1.44806	1.45918	1.29732	1.52376	1.44676	1.74647	1.05755	1.70449	1.2991	1.17317	1.36032	1.46822	1.10979	1.12272	2.00021	1.35759	1.33767	1.40939	1.28438	1.70991		101.378	1.21691	1.63355	1.59396	1.28707	1.28067	1.36471	1.39548	1.43675	1.21918	2.07502	1.51933	1.85831	1.91055	1.87894	1.8823
113.125	1.45352	1.16751	1.45742	1.43124	1.26787	1.51112	1.44128	1.76346	1.05953	1.6909	1.27145	1.16027	1.34151	1.45385	1.09239	1.12306	2.03612	1.36991	1.33402	1.38965	1.29836	1.68745		101.941	1.23742	1.63309	1.59883	1.29246	1.26696	1.3513	1.39075	1.44088	1.23602	2.07177	1.55446	1.83415	1.93995	1.90401	1.85521
113.75	1.46118	1.17025	1.48243	1.40346	1.26926	1.52841	1.42742	1.79974	1.06446	1.68504	1.25962	1.18315	1.33578	1.42853	1.09612	1.1305	2.00825	1.40739	1.33906	1.37259	1.34161	1.69758		102.504	1.25392	1.65894	1.58411	1.33774	1.24685	1.35132	1.40092	1.43582	1.25497	2.0647	1.56571	1.82257	1.96224	1.86786	1.84828
114.375	1.52613	1.17393	1.49966	1.40447	1.28043	1.51795	1.43442	1.79764	1.06878	1.69032	1.26735	1.18359	1.34305	1.39688	1.10952	1.10944	1.80907	1.43991	1.3244	1.3585	1.32437	1.6978		103.067	1.25633	1.65722	1.579	1.32217	1.2295	1.34865	1.39491	1.41767	1.29823	2.04244	1.54392	1.7872	1.96625	1.82546	1.79433
115	1.60724	1.17522	1.49428	1.42855	1.29089	1.64386	1.43492	1.78852	1.07069	1.69977	1.26305	1.1778	1.34356	1.36604	1.09366	1.11032	1.85193	1.45953	1.3281	1.33494	1.26105	1.67179		103.631	1.24705	1.66461	1.58574	1.3346	1.24183	1.34066	1.39121	1.40205	1.28785	2.06424	1.55228	1.75496	1.96764	1.82894	1.77638
115.625	1.63139	1.15028	1.52225	1.44163	1.29946	1.65611	1.41472	1.80069	1.07455	1.68455	1.25104	1.19546	1.33777	1.33801	1.11638	1.12144	1.90011	1.47619	1.35116	1.31924	1.25655	1.63016		104.194	1.24315	1.64855	1.60034	1.34529	1.23509	1.34124	1.36017	1.40936	1.27477	2.09723	1.55355	1.7499	1.96934	1.81424	1.73432
116.25	1.57823	1.14505	1.54608	1.43245	1.33421	1.59743	1.40154	1.82735	1.10341	1.67408	1.25495	1.18783	1.34152	1.35684	1.11774	1.13259	1.93915	1.49995	1.36023	1.34516	1.27208	1.59426		104.757	1.2565	1.66326	1.63827	1.38739	1.24013	1.35328	1.36026	1.42329	1.27078	2.05661	1.53079	1.74835	2.00091	1.85273	1.69155
116.875	1.50887	1.14915	1.57984	1.42457	1.34613	1.55698	1.41758	1.90627	1.13294	1.70089	1.25399	1.16596	1.34786	1.36636	1.12894	1.15728	1.88794	1.50867	1.35335	1.41684	1.28183	1.56992		105.32	1.27058	1.6656	1.67517	1.38427	1.25341	1.36495	1.3911	1.44474	1.28828	2.00568	1.50088	1.75249	1.99988	1.87551	1.6556
117.5	1.48041	1.16466	1.6178	1.43784	1.30897	1.52473	1.43389	1.96173	1.14842	1.74257	1.24703	1.15881	1.35782	1.35815	1.12232	1.15471	1.84556	1.51916	1.36669	1.41801	1.35231	1.61264		105.883	1.29503	1.68351	1.70127	1.38894	1.27048	1.39472	1.39369	1.44032	1.24991	1.99375	1.49172	1.75977	1.95197	1.87387	1.66555
118.125	1.50128	1.17332	1.6634	1.46213	1.32789	1.51533	1.42786	1.93523	1.15272	1.76005	1.23087	1.15441	1.38187	1.36036	1.09356	1.14155	1.71781	1.52384	1.3828	1.40054	1.35732	1.60054		106.447	1.34376	1.67356	1.71544	1.33816	1.27987	1.3817	1.38673	1.41249	1.23595	1.97065	1.49358	1.77757	1.9238	1.83429	1.66579
118.75	1.5274	1.18118	1.71445	1.47484	1.34374	1.53382	1.41234	1.88049	1.15604	1.78163	1.23241	1.17317	1.41359	1.36534	1.11045	1.11953	1.65075	1.54343	1.38697	1.4018	1.32588	1.61931		107.01	1.37251	1.65912	1.7083	1.30979	1.28815	1.37651	1.39896	1.3988	1.22614	2.01815	1.52058	1.79959	1.91169	1.79607	1.6533
119.375	1.48576	1.19225	1.68675	1.49554	1.34651	1.53727	1.40946	1.8555	1.13458	1.79535	1.23623	1.17458	1.4548	1.39559	1.12515	1.1127	1.58049	1.55741	1.38154	1.37431	1.34197	1.66581		107.573	1.3379	1.6482	1.70077	1.32004	1.26676	1.37185	1.35897	1.40427	1.22209	2.07162	1.53211	1.81334	1.88686	1.77845	1.62956
120	1.47631	1.19449	1.60031	1.49547	1.29442	1.51704	1.42886	1.86233	1.12495	1.80307	1.22222	1.16971	1.50984	1.40753	1.10905	1.10554	1.59211	1.59676	1.36088	1.35393	1.34964	1.61047		108.136	1.34215	1.64331	1.6799	1.28976	1.26164	1.37794	1.35109	1.4008	1.25131	2.05218	1.5524	1.81513	1.87534	1.77603	1.58666
120.625	1.51063	1.19253	1.5487	1.48868	1.2441	1.51398	1.45495	1.82612	1.14096	1.80474	1.2088	1.18469	1.57484	1.3984	1.10202	1.11834	1.63257	1.61596	1.34972	1.40097	1.27823	1.57463		108.7	1.31426	1.65588	1.69542	1.28171	1.26904	1.38249	1.3365	1.38531	1.28556	2.08297	1.52789	1.78229	1.90232	1.78141	1.65589
121.25	1.5131	1.19056	1.5335	1.49986	1.23954	1.51645	1.45466	1.84702	1.13884	1.79279	1.21275	1.18093	1.58463	1.36349	1.12216	1.13393	1.6876	1.59577	1.3454	1.42288	1.22169	1.64524		109.263	1.28358	1.64609	1.6762	1.29445	1.24274	1.38801	1.33092	1.40711	1.28285	2.03151	1.51958	1.7515	1.92082	1.7941	1.65495
121.875	1.49919	1.20247	1.54515	1.55588	1.23525	1.53552	1.4273	1.81223	1.13244	1.78542	1.2447	1.19487	1.55586	1.36064	1.1406	1.13045	1.76679	1.54347	1.34452	1.40882	1.21945	1.66595		109.826	1.28177	1.61494	1.65716	1.28663	1.25728	1.38272	1.3169	1.43727	1.31497	2.01262	1.52621	1.72746	1.91889	1.80455	1.67088
122.5	1.45632	1.19679	1.56983	1.58854	1.26122	1.55232	1.42205	1.70011	1.12575	1.79104	1.23103	1.19652	1.53183	1.36602	1.12468	1.11321	1.7256	1.50013	1.35009	1.38498	1.24674	1.61744		110.389	1.27283	1.60277	1.64964	1.27879	1.25868	1.36494	1.30927	1.44424	1.29488	1.99092	1.499	1.7238	1.88699	1.79164	1.64898
123.125	1.39803	1.15699	1.61597	1.60008	1.26814	1.53732	1.43518	1.63475	1.12219	1.79881	1.22403	1.19824	1.50503	1.3359	1.12258	1.11486	1.65083	1.46653	1.37589	1.37861	1.29794	1.58317		110.952	1.28123	1.61617	1.61309	1.28361	1.28276	1.35947	1.33785	1.44858	1.28242	1.95996	1.48151	1.71002	1.87942	1.77828	1.6712
123.75	1.38448	1.14586	1.63371	1.59941	1.26444	1.5177	1.41387	1.60961	1.12554	1.80255	1.21588	1.20293	1.51866	1.31381	1.11937	1.11298	1.67927	1.4542	1.40659	1.33723	1.36653	1.59517		111.516	1.25586	1.62444	1.6221	1.27141	1.29553	1.34835	1.33015	1.44952	1.2759	1.9277	1.51185	1.71284	1.87074	1.78118	1.64644
124.375	1.37577	1.1505	1.61554	1.50028	1.26313	1.53926	1.41746	1.60318	1.12015	1.79687	1.21881	1.23223	1.53566	1.30714	1.12466	1.12003	1.72805	1.45099	1.44417	1.32538	1.39228	1.60747		112.079	1.26335	1.59834	1.62477	1.26997	1.28273	1.35053	1.34007	1.45987	1.27845	1.89336	1.53497	1.73533	1.88193	1.75976	1.61574
125	1.40083	1.16246	1.64059	1.43973	1.28316	1.52691	1.44038	1.65301	1.11239	1.7802	1.23152	1.23533	1.56495	1.26718	1.1144	1.15708	1.6852	1.45726	1.47766	1.31983	1.38398	1.60942		112.642	1.28387	1.59895	1.61329	1.27024	1.29481	1.34983	1.31741	1.42987	1.26513	1.92049	1.54497	1.7278	1.90067	1.72767	1.58871
125.625	1.38276	1.20274	1.65222	1.42975	1.29463	1.52414	1.43697	1.67963	1.11624	1.76841	1.23501	1.2233	1.60765	1.23791	1.10464	1.20848	1.66117	1.46941	1.48145	1.35145	1.37065	1.59264		113.205	1.31524	1.62325	1.56407	1.26435	1.26902	1.34702	1.32455	1.41341	1.28217	1.9286	1.53903	1.71029	1.86887	1.74578	1.59384
126.25	1.37204	1.23724	1.685	1.40408	1.26545	1.50761	1.44017	1.70125	1.12864	1.77199	1.26323	1.20792	1.64143	1.24321	1.10273	1.21528	1.68482	1.47371	1.44335	1.37257	1.34199	1.5841		113.768	1.31215	1.61884	1.59291	1.25544	1.26331	1.34616	1.32451	1.41842	1.29079	1.84857	1.53749	1.67685	1.80538	1.75892	1.57714
126.875	1.39384	1.23441	1.71778	1.40789	1.29824	1.53123	1.42356	1.73897	1.13579	1.77414	1.27863	1.19698	1.68742	1.28262	1.10805	1.20684	1.66962	1.46275	1.3917	1.32025	1.33363	1.60023		114.332	1.30144	1.6457	1.58892	1.26243	1.2611	1.34492	1.29226	1.41888	1.3476	1.89442	1.53026	1.66161	1.78594	1.74636	1.56646
127.5	1.36821	1.2113	1.68421	1.42912	1.31666	1.56055	1.39009	1.75242	1.1356	1.79204	1.28209	1.17467	1.74253	1.31894	1.1294	1.19766	1.66264	1.47388	1.36122	1.31639	1.34641	1.59813		114.895	1.28908	1.68641	1.59191	1.2495	1.26381	1.3712	1.28099	1.41706	1.31791	1.91635	1.50944	1.67246	1.79303	1.75607	1.55263
128.125	1.37233	1.18476	1.62902	1.40923	1.31454	1.58524	1.39881	1.76729	1.1284	1.85282	1.27616	1.17397	1.73546	1.33464	1.1314	1.21893	1.61088	1.50146	1.36064	1.36944	1.3914	1.63885		115.458	1.2778	1.73263	1.61253	1.25125	1.2837	1.3755	1.32691	1.40593	1.32969	1.8964	1.52243	1.67693	1.81658	1.73582	1.53186
128.75	1.38353	1.18391	1.63625	1.35358	1.27425	1.61145	1.39867	1.82774	1.12188	1.93171	1.27567	1.19705	1.70752	1.31414	1.12824	1.24866	1.59485	1.51835	1.36605	1.39344	1.3485	1.68086		116.021	1.25177	1.71255	1.61788	1.24233	1.28624	1.36354	1.33072	1.41749	1.29449	1.91561	1.51585	1.67741	1.87013	1.70057	1.55485
129.375	1.37697	1.20173	1.64564	1.33037	1.21128	1.58241	1.40108	1.86678	1.11506	1.99122	1.28054	1.20045	1.69253	1.32656	1.13626	1.2157	1.57248	1.54669	1.36606	1.362	1.3296	1.70166		116.584	1.25419	1.71195	1.61471	1.26391	1.26519	1.34908	1.30437	1.42029	1.3109	1.97238	1.51692	1.65773	1.91106	1.68625	1.54218
130	1.36726	1.22025	1.59114	1.34215	1.19521	1.59945	1.40369	1.88323	1.09114	1.98964	1.29014	1.2228	1.64116	1.3338	1.15727	1.21418	1.57235	1.5981	1.36117	1.33548	1.31218	1.72628		117.148	1.24402	1.7086	1.63614	1.24878	1.24632	1.34291	1.31083	1.43952	1.3049	1.99252	1.49707	1.65297	1.93471	1.66767	1.56039
130.625	1.33775	1.22427	1.56413	1.3789	1.21645	1.59343	1.39925	1.83725	1.07628	1.99384	1.2961	1.21676	1.60368	1.35888	1.16974	1.2269	1.55794	1.61938	1.36602	1.34292	1.34039	1.76576		117.711	1.26791	1.68383	1.65185	1.2705	1.24294	1.34525	1.31654	1.42619	1.29914	1.95415	1.50102	1.6375	1.92378	1.6308	1.57846
131.25	1.34896	1.20588	1.56467	1.39688	1.23953	1.57877	1.39864	1.79356	1.07637	2.00395	1.27053	1.20556	1.59446	1.34099	1.18633	1.21014	1.48171	1.55473	1.37583	1.33559	1.35388	1.7482		118.274	1.26363	1.68565	1.64286	1.29491	1.25265	1.36816	1.33601	1.42907	1.29212	1.97457	1.52126	1.63186	1.90376	1.65062	1.55957
131.875	1.35756	1.18657	1.53237	1.3998	1.24291	1.57355	1.41777	1.84644	1.07944	1.99977	1.22392	1.19466	1.59012	1.33921	1.20427	1.19575	1.5081	1.48823	1.39894	1.33536	1.29841	1.75728		118.837	1.26431	1.72656	1.6389	1.28031	1.27848	1.37705	1.34066	1.42608	1.34012	1.94252	1.53659	1.6263	1.91283	1.66154	1.54303
132.5	1.37209	1.17573	1.5017	1.35837	1.21132	1.56089	1.42696	1.90647	1.07456	1.94408	1.21349	1.19427	1.59211	1.31974	1.20015	1.18237	1.57202	1.4538	1.43048	1.34728	1.28354	1.75351		119.401	1.25393	1.83285	1.65317	1.27496	1.27913	1.38909	1.33143	1.43262	1.30268	1.92898	1.56613	1.62433	1.9304	1.67445	1.51539
133.125	1.39767	1.19356	1.50256	1.33818	1.229	1.52877	1.44003	1.8897	1.06626	1.90407	1.22863	1.18024	1.58565	1.35509	1.19053	1.17297	1.56415	1.42899	1.43366	1.35038	1.30935	1.70014		119.964	1.23308	1.85011	1.64468	1.2918	1.25059	1.38825	1.32144	1.44952	1.29774	1.8773	1.56302	1.63079	1.89884	1.66911	1.53137
133.75	1.37103	1.21131	1.52243	1.33686	1.23768	1.51319	1.46139	1.79545	1.05821	1.93191	1.24065	1.18091	1.58862	1.37852	1.18017	1.17958	1.5803	1.43432	1.39852	1.36412	1.3499	1.66823		120.527	1.25313	1.87171	1.63626	1.29618	1.24629	1.39206	1.29976	1.44715	1.27305	1.88973	1.55643	1.63038	1.84668	1.65896	1.54246
134.375	1.33949	1.20887	1.51703	1.32745	1.25431	1.51757	1.44324	1.73798	1.05074	1.9925	1.23084	1.1955	1.61214	1.37313	1.17096	1.18032	1.60529	1.46089	1.36915	1.35458	1.38382	1.66301		121.09	1.28732	1.85383	1.62531	1.29005	1.23129	1.39268	1.29751	1.42685	1.2598	1.8765	1.52493	1.63547	1.85544	1.67047	1.60222
135	1.31446	1.19575	1.50211	1.33234	1.26651	1.54401	1.47414	1.76858	1.05399	2.05527	1.22307	1.19244	1.62072	1.36818	1.15499	1.17868	1.61157	1.47782	1.34104	1.34536	1.39282	1.714		121.653	1.32028	1.81556	1.6602	1.30493	1.24683	1.38645	1.33633	1.42254	1.27882	1.88924	1.50015	1.68817	1.9134	1.66126	1.61568
135.625	1.32817	1.18771	1.4871	1.33181	1.2741	1.53491	1.51417	1.80693	1.05671	2.09922	1.22949	1.1696	1.61306	1.34085	1.15967	1.16545	1.57249	1.47463	1.32484	1.35755	1.40716	1.70287		122.217	1.35254	1.7912	1.6843	1.28112	1.26316	1.4008	1.33633	1.41031	1.22166	1.90238	1.51552	1.74386	1.95806	1.68074	1.63073
136.25	1.3467	1.19261	1.48206	1.3436	1.2806	1.51972	1.51708	1.89732	1.05949	2.13825	1.23211	1.16887	1.57804	1.34361	1.15997	1.14419	1.6047	1.47698	1.32631	1.383	1.35788	1.71251		122.78	1.32923	1.78221	1.73599	1.2884	1.27761	1.42358	1.3124	1.39735	1.23507	1.90235	1.50663	1.79964	1.95459	1.64193	1.63139
136.875	1.34657	1.186	1.47464	1.39653	1.26826	1.51776	1.5031	2.02417	1.07606	2.20489	1.21906	1.16289	1.55732	1.37313	1.14281	1.11873	1.71924	1.47753	1.32067	1.39317	1.28032	1.75356		123.343	1.30516	1.77947	1.73798	1.29111	1.22898	1.44944	1.31854	1.40686	1.21913	1.87675	1.52267	1.79636	1.94494	1.65462	1.5857
137.5	1.33806	1.15701	1.47637	1.45001	1.28388	1.51508	1.49013	2.09596	1.1	2.25855	1.23219	1.19866	1.55797	1.38355	1.14001	1.10677	1.81584	1.50246	1.32212	1.37186	1.30126	1.839		123.906	1.2954	1.78194	1.77904	1.28248	1.25289	1.45781	1.31753	1.41656	1.21196	1.86221	1.51814	1.74688	1.96224	1.63978	1.58006
138.125	1.31598	1.1412	1.50083	1.45279	1.26665	1.54032	1.49869	2.16237	1.1023	2.26128	1.24958	1.23397	1.55721	1.3769	1.15797	1.10946	1.75762	1.52719	1.32379	1.37444	1.37762	1.79515		124.469	1.26867	1.77378	1.74896	1.27858	1.23359	1.45005	1.28637	1.42694	1.22195	1.88413	1.53126	1.71278	1.98615	1.62273	1.61674
138.75	1.33155	1.13195	1.54171	1.42395	1.2525	1.58378	1.50994	2.19256	1.08174	2.16884	1.27562	1.23038	1.56469	1.36375	1.17537	1.11726	1.69764	1.49647	1.32359	1.36623	1.44182	1.78981		125.033	1.25617	1.78716	1.75809	1.27669	1.23995	1.42628	1.28652	1.43909	1.23509	1.87844	1.50096	1.75457	2.01002	1.6149	1.62378
139.375	1.34413	1.13056	1.55481	1.43349	1.26708	1.53154	1.53384	2.20828	1.06535	2.05596	1.27207	1.21613	1.57028	1.34421	1.18176	1.1377	1.58852	1.47559	1.32813	1.35498	1.41517	1.7249		125.596	1.24421	1.86507	1.72696	1.24315	1.24542	1.42346	1.26768	1.45503	1.25596	1.86338	1.48445	1.80897	2.05184	1.63116	1.64259
140	1.36734	1.13574	1.56744	1.44389	1.3072	1.49835	1.54621	2.21591	1.05271	1.98922	1.25811	1.20848	1.54126	1.30613	1.18883	1.15212	1.5447	1.47147	1.33094	1.38439	1.36412	1.69024		126.159	1.23121	1.8417	1.72597	1.26526	1.23043	1.42226	1.30548	1.45496	1.27222	1.87379	1.45475	1.85336	2.05137	1.63752	1.63675
140.625	1.37254	1.13197	1.53871	1.4664	1.26903	1.48525	1.50949	2.14576	1.03321	1.94231	1.25293	1.21368	1.50609	1.29501	1.16606	1.18358	1.56856	1.45603	1.35162	1.45922	1.31248	1.68104		126.722	1.21778	1.77392	1.71561	1.27742	1.2254	1.42013	1.31985	1.45571	1.32955	1.89904	1.44556	1.87374	2.03312	1.63162	1.63565
141.25	1.40314	1.11993	1.50816	1.44249	1.23631	1.474	1.51127	2.04643	1.01298	1.91991	1.26025	1.22071	1.49235	1.27088	1.17007	1.21793	1.53507	1.43476	1.4034	1.47832	1.32552	1.69075		127.285	1.2181	1.76911	1.72712	1.27842	1.21411	1.40596	1.32699	1.47054	1.29406	1.90904	1.44579	1.8391	2.06775	1.60871	1.64811
141.875	1.42768	1.10797	1.49292	1.38812	1.27112	1.42116	1.52737	1.99929	0.998555	1.91929	1.2856	1.19575	1.53111	1.28415	1.18965	1.23861	1.57227	1.44068	1.42614	1.48181	1.32333	1.73802		127.849	1.2019	1.74954	1.73278	1.27617	1.19291	1.40784	1.36341	1.47847	1.31164	1.91838	1.48949	1.81374	2.12261	1.61678	1.64923
142.5	1.41883	1.11224	1.48003	1.33808	1.30752	1.42074	1.53232	1.94211	0.998408	1.95554	1.32733	1.18973	1.57701	1.2936	1.17592	1.24065	1.62274	1.44094	1.41124	1.44876	1.30076	1.81597		128.412	1.20739	1.72645	1.71114	1.28188	1.20425	1.41088	1.36215	1.45363	1.26299	1.9063	1.49001	1.79519	2.16518	1.62081	1.68347
143.125	1.42167	1.10195	1.48007	1.35836	1.30792	1.41535	1.53047	1.94751	1.00394	2.01345	1.32642	1.22895	1.58456	1.29297	1.18684	1.20861	1.63424	1.42346	1.40984	1.425	1.29262	1.91526		128.975	1.1858	1.73155	1.72168	1.26699	1.22516	1.4321	1.32773	1.4472	1.25608	1.88239	1.50263	1.79114	2.20133	1.60912	1.65936
143.75	1.37603	1.10589	1.48612	1.38787	1.28143	1.40592	1.5532	1.89333	1.00883	2.05286	1.25947	1.28082	1.56448	1.25229	1.16669	1.1622	1.66705	1.42978	1.40689	1.45828	1.29752	1.90651		129.538	1.16358	1.73797	1.70492	1.28171	1.21751	1.47151	1.32203	1.44182	1.21868	1.86047	1.51107	1.76886	2.23975	1.59722	1.67762
144.375	1.35932	1.09713	1.50174	1.36002	1.26296	1.43073	1.54849	1.81287	1.02356	2.02709	1.20493	1.32979	1.54986	1.23766	1.15555	1.13346	1.69311	1.49156	1.39943	1.44473	1.29891	1.82642		130.102	1.1578	1.76245	1.66785	1.25092	1.24209	1.50845	1.32445	1.44774	1.19711	1.84638	1.51745	1.75197	2.2853	1.59132	1.66553
145	1.33293	1.0937	1.52665	1.32778	1.26531	1.42496	1.54043	1.76308	1.02908	1.99655	1.17547	1.34396	1.55432	1.22094	1.16711	1.11713	1.65803	1.59739	1.40412	1.42199	1.27964	1.79237		130.665	1.19324	1.74359	1.66866	1.25797	1.24553	1.52602	1.32777	1.45753	1.24549	1.83242	1.521	1.71994	2.28909	1.60828	1.64377
145.625	1.30876	1.09997	1.54317	1.35368	1.27296	1.44481	1.52647	1.6859	1.02671	2.00208	1.18411	1.34665	1.56296	1.22981	1.15679	1.12503	1.65102	1.68731	1.41339	1.408	1.24216	1.79309		131.228	1.22552	1.74563	1.68261	1.28822	1.25768	1.53461	1.31373	1.45507	1.23673	1.86825	1.48914	1.67914	2.2147	1.66885	1.59639
146.25	1.30732	1.08883	1.54125	1.37774	1.3044	1.45947	1.51901	1.63395	1.01475	2.02853	1.19555	1.37788	1.5592	1.27694	1.13823	1.14097	1.62566	1.75314	1.41421	1.36221	1.22989	1.84313		131.791	1.22795	1.80249	1.67669	1.2894	1.2512	1.49	1.3231	1.43709	1.23782	1.90642	1.46766	1.68297	2.14529	1.67518	1.61211
146.875	1.32812	1.07142	1.52347	1.39245	1.30935	1.47461	1.50425	1.70804	1.00551	2.0476	1.20167	1.34761	1.60097	1.27779	1.13485	1.15475	1.68653	1.78211	1.43089	1.36344	1.21685	1.81879		132.354	1.23237	1.79595	1.68193	1.28581	1.27036	1.44979	1.33696	1.44075	1.23873	1.93106	1.4526	1.70889	2.14202	1.62111	1.62888
147.5	1.32261	1.07254	1.52529	1.40441	1.29935	1.48157	1.51969	1.91891	0.992614	2.06498	1.20478	1.29687	1.64166	1.26627	1.14938	1.16624	1.74227	1.77501	1.46313	1.40446	1.22356	1.8478		132.918	1.23636	1.77199	1.65885	1.29751	1.27264	1.4335	1.31066	1.4541	1.23377	1.94045	1.46438	1.72977	2.13223	1.56603	1.60277
148.125	1.30768	1.08419	1.51426	1.42332	1.27025	1.466	1.54814	1.98087	1.01008	2.08974	1.1898	1.26102	1.64252	1.27434	1.16831	1.17462	1.72713	1.69045	1.4818	1.40081	1.23423	1.85146		133.481	1.2462	1.81617	1.63755	1.30835	1.256	1.41052	1.31063	1.43977	1.26085	1.94257	1.47309	1.73576	2.12599	1.56438	1.56809
148.75	1.28845	1.09213	1.48235	1.41611	1.24051	1.42756	1.56034	1.94617	1.03141	2.11059	1.19721	1.24448	1.59929	1.30222	1.14965	1.19871	1.7722	1.61614	1.47169	1.40912	1.24576	1.78702		134.044	1.23673	1.8327	1.63944	1.31047	1.24706	1.4138	1.31652	1.41454	1.27728	1.93013	1.47812	1.73554	2.10382	1.54442	1.55231
149.375	1.24646	1.0935	1.45855	1.4201	1.24523	1.42481	1.55274	1.87039	1.02988	2.11614	1.2015	1.20306	1.5733	1.27748	1.13368	1.22768	1.89949	1.58039	1.42202	1.36102	1.25324	1.71538		134.607	1.22775	1.85374	1.68118	1.29755	1.24478	1.42995	1.29129	1.408	1.30983	1.94099	1.4595	1.76489	2.08689	1.53976	1.55934
150	1.24115	1.08343	1.46167	1.42587	1.20474	1.4298	1.52423	1.8686	1.01688	2.13992	1.19934	1.21763	1.57479	1.27046	1.14603	1.22263	1.82347	1.55651	1.41441	1.32113	1.22727	1.72538		135.17	1.22395	1.89062	1.66842	1.31829	1.22395	1.45327	1.30523	1.41379	1.25655	1.89577	1.42137	1.79569	2.10047	1.58223	1.54551
150.625	1.21572	1.07977	1.4721	1.44113	1.19846	1.43816	1.54339	1.89958	1.01458	2.08764	1.18936	1.23371	1.59245	1.23852	1.15144	1.23525	1.727	1.54142	1.43603	1.36143	1.1948	1.75501		135.734	1.23171	1.90328	1.6411	1.31781	1.25536	1.48458	1.32001	1.41342	1.25802	1.91175	1.42023	1.84461	2.13374	1.56404	1.54432
151.25	1.22465	1.08422	1.4781	1.47001	1.21276	1.44195	1.60244	1.8739	1.02319	2.01741	1.17038	1.22478	1.56289	1.23859	1.14556	1.26656	1.74531	1.54131	1.4383	1.38634	1.19743	1.7456		136.297	1.20359	1.90202	1.63144	1.30133	1.25999	1.49087	1.33088	1.39519	1.26879	1.94775	1.43005	1.89728	2.18982	1.58537	1.55143
151.875	1.24363	1.09039	1.47201	1.42536	1.20598	1.41378	1.66873	1.76776	1.03684	1.96209	1.16534	1.2072	1.52721	1.2654	1.12431	1.30574	1.89553	1.55844	1.40431	1.40544	1.22821	1.74724		136.86	1.18399	1.88663	1.60844	1.30268	1.27231	1.51657	1.32663	1.39389	1.25248	1.98113	1.47035	1.87281	2.26203	1.56815	1.56169
152.5	1.24012	1.08546	1.46249	1.41246	1.19365	1.40692	1.7009	1.63122	1.0516	1.93174	1.16184	1.18911	1.51071	1.26984	1.13671	1.31549	2.03526	1.53591	1.36211	1.42926	1.21864	1.7557		137.423	1.19578	1.84105	1.60072	1.31098	1.25435	1.54904	1.32691	1.41745	1.24103	2.00635	1.48273	1.81657	2.30874	1.57371	1.51238
153.125	1.26203	1.08554	1.45882	1.42329	1.18092	1.42866	1.70413	1.58324	1.05631	1.95415	1.15812	1.19796	1.50342	1.28432	1.12209	1.29712	2.08298	1.50623	1.34998	1.44341	1.2297	1.77617		137.986	1.18884	1.83323	1.60813	1.29622	1.2431	1.56409	1.31724	1.41579	1.23428	2.01835	1.5183	1.75715	2.28994	1.57285	1.53281
153.75	1.27976	1.09275	1.43697	1.40422	1.20033	1.401	1.66585	1.68151	1.04843	2.00186	1.16416	1.18326	1.51682	1.28391	1.09437	1.25592	2.03299	1.50725	1.34914	1.40438	1.24204	1.83544		138.55	1.211	1.85076	1.5696	1.31481	1.22863	1.527	1.31726	1.41061	1.25577	2.07443	1.57795	1.71946	2.22926	1.53087	1.52811
154.375	1.23604	1.09233	1.42311	1.38718	1.14774	1.41624	1.60753	1.58773	1.05337	2.01231	1.15956	1.16779	1.53153	1.28479	1.07809	1.20832	2.05013	1.54872	1.35485	1.4078	1.21486	1.9521		139.113	1.23299	1.82345	1.53916	1.33536	1.20668	1.48211	1.30367	1.41406	1.26626	2.07585	1.61805	1.71159	2.20302	1.51078	1.54585
155	1.21388	1.09004	1.38872	1.35131	1.15174	1.45445	1.58184	1.48411	1.06681	1.96905	1.17815	1.1626	1.54857	1.28983	1.07356	1.15767	2.02057	1.55366	1.37553	1.4352	1.20808	1.97421		139.676	1.23835	1.79326	1.55076	1.30395	1.20118	1.45115	1.32735	1.41109	1.26311	2.00412	1.51956	1.70205	2.16861	1.54275	1.54576
155.625	1.21969	1.08624	1.36021	1.33772	1.16094	1.48131	1.57698	1.41885	1.07636	1.92469	1.2073	1.14651	1.56735	1.26385	1.08093	1.1297	1.97417	1.50075	1.41278	1.43778	1.20059	1.88247		140.239	1.28263	1.81092	1.53861	1.3234	1.18447	1.43832	1.30584	1.39817	1.28306	2.00881	1.49114	1.70186	2.14718	1.55903	1.54679
156.25	1.21437	1.09209	1.37286	1.36332	1.14927	1.4989	1.55368	1.37009	1.07494	1.85636	1.19407	1.14725	1.56912	1.25552	1.07694	1.14277	2.04301	1.44529	1.45159	1.44967	1.2236	1.85494		140.802	1.24814	1.80743	1.58148	1.32613	1.20402	1.45129	1.2747	1.3986	1.28423	2.02222	1.50268	1.67936	2.12511	1.55401	1.54965
156.875	1.2208	1.09406	1.38284	1.4157	1.13785	1.50458	1.55547	1.33306	1.06443	1.78161	1.1621	1.1478	1.53205	1.26337	1.09241	1.17958	1.97821	1.44035	1.47689	1.44863	1.23413	1.91949		141.366	1.18502	1.768	1.58638	1.31813	1.20965	1.48029	1.26947	1.40091	1.26949	2.06084	1.509	1.66421	2.09707	1.51978	1.58122
157.5	1.23562	1.09613	1.41803	1.41324	1.11351	1.51164	1.58457	1.32707	1.05764	1.74242	1.16181	1.14492	1.48799	1.26291	1.09053	1.26424	1.91815	1.45273	1.47728	1.38657	1.23294	1.89195		141.929	1.16604	1.71278	1.56518	1.31217	1.19176	1.46734	1.25725	1.39487	1.26248	2.08262	1.48891	1.65038	2.09136	1.517	1.58609
158.125	1.2675	1.09368	1.4281	1.39012	1.10652	1.51632	1.62504	1.3338	1.06097	1.75275	1.17187	1.15575	1.47384	1.266	1.08875	1.35048	1.89655	1.46129	1.46538	1.36996	1.21658	1.90306		142.492	1.16205	1.7207	1.55463	1.33949	1.20932	1.44909	1.26557	1.38615	1.25547	2.07407	1.47005	1.65397	2.11134	1.53192	1.57904
158.75	1.25705	1.08808	1.44278	1.40907	1.12235	1.50749	1.61222	1.32843	1.06761	1.80329	1.18564	1.16619	1.4842	1.26289	1.07875	1.36389	1.84589	1.46997	1.45513	1.36538	1.20991	2.02127		143.055	1.13915	1.73308	1.56954	1.33424	1.1942	1.45388	1.26884	1.39137	1.27576	2.05689	1.46015	1.66376	2.14363	1.55888	1.55831
159.375	1.23427	1.08535	1.4302	1.39588	1.0933	1.52302	1.58498	1.33654	1.07873	1.85875	1.20116	1.1799	1.49877	1.23119	1.07107	1.33773	1.67925	1.47534	1.48186	1.35539	1.2111	2.11548		143.619	1.09831	1.7649	1.63201	1.33049	1.1793	1.44522	1.28542	1.38692	1.2803	2.04591	1.46869	1.68585	2.14431	1.52695	1.53741
160	1.21315	1.0971	1.42149	1.40974	1.0907	1.54534	1.59333	1.35695	1.0815	1.89855	1.19753	1.18956	1.49329	1.22046	1.05938	1.36771	1.66893	1.4883	1.56058	1.33393	1.21862	2.12542		144.182	1.08853	1.81481	1.68127	1.3219	1.16309	1.42371	1.31362	1.38088	1.27603	2.06738	1.46936	1.68029	2.16108	1.48847	1.55455
160.625	1.22683	1.10243	1.4008	1.37592	1.0867	1.50863	1.61198	1.32409	1.07398	1.93355	1.19817	1.19286	1.47126	1.21796	1.04596	1.36929	1.72226	1.50344	1.59894	1.35613	1.19976	2.09929		144.745	1.07668	1.83556	1.62338	1.32711	1.17647	1.41819	1.3075	1.37752	1.27855	2.08831	1.42253	1.6687	2.20428	1.49277	1.59182
161.25	1.23169	1.10527	1.38216	1.38852	1.08829	1.51455	1.61619	1.28278	1.06395	1.91835	1.19079	1.22342	1.43174	1.21777	1.04452	1.29815	1.68689	1.50402	1.57692	1.39879	1.22837	2.08986		145.308	1.07966	1.85215	1.60324	1.32678	1.17751	1.42058	1.27096	1.3728	1.27224	2.0788	1.39304	1.66296	2.19755	1.4782	1.61662
161.875	1.24141	1.09533	1.36954	1.41348	1.09412	1.50957	1.63839	1.2265	1.07257	1.84382	1.1651	1.23671	1.4069	1.24343	1.04857	1.2602	1.79793	1.49938	1.52368	1.36523	1.23533	2.09329		145.871	1.08478	1.84265	1.61612	1.31083	1.18562	1.42891	1.24941	1.37827	1.25682	2.08688	1.41596	1.66937	2.16097	1.46325	1.65963
162.5	1.23989	1.0896	1.36467	1.41474	1.10873	1.49827	1.63879	1.22002	1.0755	1.77217	1.14782	1.20806	1.40055	1.25987	1.03661	1.2647	1.87078	1.50154	1.4863	1.35215	1.21378	2.2616		146.435	1.07577	1.8323	1.66807	1.33762	1.18631	1.4092	1.27363	1.39019	1.27227	2.08125	1.46658	1.68357	2.15449	1.479	1.63819
163.125	1.23043	1.08994	1.37658	1.38726	1.11119	1.47002	1.65276	1.21732	1.07618	1.75538	1.14398	1.17892	1.40907	1.24243	1.04635	1.27943	1.82766	1.48625	1.46233	1.36513	1.2058	2.34075		146.998	1.09175	1.82247	1.68532	1.33637	1.17199	1.41123	1.26627	1.38647	1.29659	2.06936	1.47972	1.67686	2.16508	1.53775	1.62232
163.75	1.22717	1.0957	1.39169	1.36156	1.12325	1.43072	1.64939	1.2001	1.07309	1.75872	1.13408	1.16222	1.42652	1.25296	1.04296	1.27838	1.78787	1.49469	1.44794	1.3642	1.20892	2.40973		147.561	1.09124	1.74851	1.67204	1.34103	1.17718	1.42189	1.27344	1.37259	1.29867	2.06142	1.44661	1.64584	2.16958	1.57166	1.60994
164.375	1.23315	1.09657	1.41585	1.33755	1.1466	1.38648	1.63627	1.18146	1.07807	1.75622	1.12331	1.15819	1.44013	1.25192	1.0343	1.28646	1.64192	1.49608	1.46207	1.34475	1.22268	2.43701		148.124	1.09151	1.7089	1.7175	1.31256	1.20695	1.42581	1.27399	1.37847	1.26626	2.05176	1.44145	1.64428	2.18195	1.56818	1.62196
165	1.24129	1.10344	1.43991	1.31639	1.16713	1.37101	1.62083	1.19697	1.09925	1.7746	1.12164	1.15606	1.43319	1.26662	1.04564	1.30499	1.6089	1.47632	1.48912	1.29837	1.2032	2.56006		148.687	1.10188	1.71323	1.66043	1.31292	1.18997	1.40262	1.31347	1.38604	1.24885	2.10464	1.4218	1.6588	2.2387	1.59793	1.63205
165.625	1.26929	1.11197	1.43605	1.3171	1.18226	1.37546	1.6308	1.20828	1.1158	1.79036	1.13192	1.16576	1.40384	1.26381	1.06985	1.32315	1.61628	1.45394	1.53926	1.2866	1.2039	2.70866		149.251	1.10459	1.71776	1.61287	1.2914	1.21288	1.3961	1.26156	1.38202	1.2772	2.14043	1.4306	1.61149	2.32226	1.56699	1.59589
166.25	1.27461	1.10386	1.42244	1.32312	1.19796	1.3832	1.64719	1.20042	1.11622	1.79736	1.15426	1.18484	1.38251	1.30846	1.08126	1.29336	1.60982	1.45248	1.56172	1.29011	1.21649	2.80025		149.814	1.11604	1.71242	1.57076	1.27552	1.18789	1.39823	1.30071	1.36701	1.27549	2.21692	1.44871	1.57971	2.39291	1.511	1.59241
166.875	1.23173	1.09733	1.41716	1.2931	1.21655	1.3867	1.65408	1.1882	1.10972	1.80608	1.15229	1.16296	1.42782	1.3411	1.0567	1.24057	1.61013	1.49885	1.50747	1.27594	1.21193	2.78926		150.377	1.1056	1.71027	1.56734	1.29651	1.197	1.40481	1.27205	1.35888	1.27702	2.2471	1.441	1.57943	2.44203	1.47238	1.60226
167.5	1.20433	1.08142	1.41398	1.29221	1.26005	1.35044	1.60565	1.18363	1.08321	1.82983	1.15287	1.1295	1.52769	1.34488	1.03384	1.20735	1.54389	1.55462	1.43309	1.25224	1.18784	2.8179		150.94	1.10552	1.72551	1.54883	1.30581	1.22856	1.41572	1.24703	1.36094	1.27849	2.18546	1.41566	1.60835	2.43395	1.46711	1.56145
168.125	1.19408	1.07252	1.40005	1.31313	1.30466	1.31605	1.54048	1.20877	1.0781	1.83132	1.14445	1.15022	1.5639	1.30072	1.00554	1.18739	1.48438	1.53278	1.38705	1.23861	1.18998	2.87302		151.503	1.0976	1.71453	1.52242	1.30209	1.23626	1.4239	1.25927	1.37761	1.28931	2.13629	1.41892	1.64704	2.43822	1.46676	1.57489
168.75	1.19662	1.06243	1.40731	1.33736	1.31192	1.31844	1.50173	1.21063	1.07894	1.81595	1.13136	1.16859	1.54577	1.2842	0.998097	1.20901	1.47811	1.54592	1.37393	1.27678	1.20339	2.55954		152.067	1.08871	1.74422	1.51187	1.30847	1.22462	1.45781	1.23078	1.36203	1.28721	2.0962	1.39638	1.64508	2.49673	1.45037	1.56937
169.375	1.18537	1.07525	1.42775	1.32021	1.28398	1.33221	1.48321	1.22052	1.06538	1.77806	1.13853	1.17156	1.50806	1.27681	0.997042	1.22675	1.53625	1.562	1.37439	1.31842	1.21163	2.2785		152.63	1.03663	1.77421	1.49349	1.31477	1.21297	1.46338	1.27845	1.35334	1.2954	2.07222	1.40952	1.66353	2.56088	1.43285	1.58956
170	1.1918	1.09587	1.45314	1.30007	1.21397	1.32171	1.49198	1.25436	1.05603	1.73583	1.14245	1.17449	1.47412	1.3299	0.989549	1.20375	1.56603	1.57169	1.39008	1.31027	1.22664	2.17728		153.193	1.0024	1.82388	1.51362	1.30526	1.20784	1.44714	1.28595	1.34332	1.2574	2.10134	1.39603	1.70289	2.55709	1.46238	1.61879
170.625	1.19014	1.0964	1.45142	1.27866	1.1573	1.35391	1.52009	1.27014	1.04947	1.72737	1.13073	1.16137	1.45288	1.46868	0.982512	1.18741	1.57819	1.57273	1.41149	1.28508	1.25018	2.20705		153.756	1.00872	1.77265	1.51299	1.30779	1.21516	1.42999	1.27522	1.32954	1.26478	2.10444	1.40916	1.71269	2.50743	1.51725	1.61035
171.25	1.1858	1.09107	1.44871	1.28173	1.14576	1.37913	1.53484	1.23645	1.03894	1.72483	1.12944	1.17905	1.43289	1.58682	0.974188	1.19713	1.56592	1.58418	1.43922	1.26865	1.26568	2.24861		154.32	1.01668	1.7305	1.49849	1.28846	1.26522	1.42046	1.25506	1.32954	1.27726	2.08982	1.38546	1.72196	2.45056	1.56727	1.57547
171.875	1.186	1.08834	1.45128	1.26021	1.1582	1.35612	1.56729	1.21205	1.02496	1.73654	1.12497	1.19673	1.44449	1.54839	0.962141	1.19846	1.57208	1.60001	1.45564	1.26502	1.29412	2.32272		154.883	1.00638	1.74722	1.50877	1.29762	1.26121	1.4178	1.27237	1.32152	1.29554	2.08267	1.40648	1.69779	2.3717	1.63265	1.61437
172.5	1.21061	1.0835	1.47443	1.25467	1.12594	1.3639	1.60394	1.24006	1.02197	1.80499	1.12445	1.19338	1.47027	1.54626	0.964403	1.19476	1.61884	1.56574	1.44851	1.2483	1.33668	2.50589		155.446	1.01382	1.73937	1.52999	1.27089	1.26007	1.41729	1.29556	1.31605	1.28567	2.08294	1.37901	1.68482	2.25095	1.62407	1.6368
173.125	1.22144	1.08315	1.47461	1.24778	1.13195	1.37199	1.6499	1.29075	1.03564	1.91104	1.11659	1.17674	1.54447	1.42412	0.969627	1.24228	1.69501	1.47888	1.41428	1.24737	1.32553	2.68081		156.009	1.01301	1.69369	1.51059	1.27027	1.22977	1.42603	1.26726	1.32374	1.29091	2.08058	1.39377	1.67091	2.18568	1.58602	1.62979
173.75	1.22531	1.09043	1.43846	1.22838	1.14683	1.36641	1.70424	1.32347	1.03206	1.97779	1.11303	1.1671	1.6357	1.39669	0.972501	1.29163	1.67481	1.43624	1.38343	1.27517	1.30951	2.63624		156.572	1.01397	1.67393	1.52402	1.28776	1.24994	1.42951	1.26034	1.33807	1.28865	2.17632	1.38729	1.63805	2.17706	1.61586	1.63448
174.375	1.22397	1.08838	1.42195	1.24611	1.1184	1.37797	1.6954	1.29777	1.02634	2.01388	1.10545	1.1759	1.77852	1.44893	0.982235	1.29141	1.69792	1.4249	1.35803	1.27956	1.28674	2.63357		157.136	0.998881	1.66982	1.51902	1.27692	1.25967	1.4127	1.2329	1.34457	1.29025	2.2499	1.38843	1.63706	2.17222	1.66105	1.6238
175	1.18774	1.0745	1.39999	1.25038	1.11506	1.32959	1.6374	1.25112	1.03265	2.0633	1.11405	1.16102	1.86496	1.39986	0.99869	1.22905	1.81194	1.43521	1.35452	1.26542	1.29175	2.62047		157.699	0.989823	1.62699	1.5026	1.2693	1.25247	1.38566	1.23933	1.33301	1.27884	2.26759	1.41819	1.65192	2.2093	1.70117	1.65102
175.625	1.17947	1.0766	1.38372	1.25002	1.15994	1.31258	1.59842	1.22326	1.03208	2.15139	1.12316	1.17097	1.71591	1.38469	1.00583	1.17784	1.82572	1.44744	1.35203	1.2579	1.26731	2.69554		158.262	0.965138	1.62465	1.49748	1.25611	1.2669	1.39983	1.23694	1.32929	1.29803	2.23975	1.41499	1.63024	2.23422	1.68233	1.71507
176.25	1.16847	1.08866	1.37457	1.2434	1.15287	1.30421	1.56624	1.21133	1.03479	2.24726	1.12139	1.24188	1.57681	1.40924	0.997428	1.19714	1.73015	1.45844	1.34202	1.2441	1.27252	2.52926		158.825	0.976843	1.65471	1.51631	1.2784	1.28588	1.37945	1.26528	1.313	1.28655	2.24024	1.39562	1.62161	2.2052	1.65391	1.73279
176.875	1.17936	1.0925	1.36977	1.22612	1.14105	1.29486	1.54587	1.21273	1.04072	2.39914	1.1248	1.33134	1.54109	1.37208	0.995386	1.23603	1.72096	1.48078	1.33256	1.24344	1.2423	2.51938		159.388	0.957213	1.64391	1.49913	1.25887	1.28877	1.35953	1.22724	1.31605	1.2654	2.24696	1.36091	1.59505	2.17418	1.67694	1.68879
177.5	1.16154	1.08144	1.37058	1.23605	1.10738	1.28712	1.55359	1.24398	1.04633	2.56719	1.12956	1.35028	1.58413	1.42312	1.0027	1.24902	1.82212	1.48744	1.32355	1.23561	1.19443	2.68338		159.952	0.93976	1.64604	1.54525	1.24648	1.29154	1.37075	1.20231	1.32783	1.31147	2.20819	1.3668	1.59252	2.11179	1.63985	1.64218
178.125	1.1495	1.06705	1.37363	1.25804	1.11355	1.28556	1.57882	1.26557	1.03838	2.64982	1.13874	1.30722	1.63154	1.50393	1.01714	1.24034	1.77781	1.48078	1.31195	1.24107	1.17163	2.65371		160.515	0.938082	1.62459	1.55843	1.23454	1.28591	1.37683	1.23412	1.33323	1.32689	2.19913	1.37751	1.57912	2.06967	1.56933	1.59875
178.75	1.13506	1.06688	1.36716	1.26457	1.14393	1.31364	1.60354	1.275	1.02051	2.60531	1.14771	1.24961	1.62561	1.4973	1.03255	1.24426	1.76704	1.47291	1.29893	1.25665	1.18433	2.73657		161.078	0.928086	1.59764	1.57299	1.25634	1.27989	1.38311	1.22125	1.35174	1.28098	2.22588	1.34566	1.55455	2.07389	1.51377	1.57642
179.375	1.12205	1.05771	1.36499	1.23914	1.13691	1.33419	1.60599	1.26393	1.01639	2.54069	1.1432	1.17593	1.6276	1.4816	1.03389	1.27386	1.72405	1.46409	1.2959	1.25501	1.17075	2.70709		161.641	0.935113	1.60168	1.57454	1.26533	1.26263	1.39692	1.23204	1.3363	1.30504	2.26275	1.37094	1.54392	2.07719	1.52052	1.58373
180	1.11378	1.05844	1.35826	1.24291	1.13112	1.33554	1.59574	1.24382	1.01594	2.50507	1.13276	1.1433	1.59897	1.4568	1.0259	1.3243	1.74139	1.453	1.30188	1.27501	1.16223	2.53386		162.204	0.947549	1.60712	1.53205	1.2574	1.26714	1.38105	1.20157	1.35134	1.30954	2.24408	1.36136	1.56318	2.09219	1.52573	1.60944
180.625	1.13204	1.0619	1.3569	1.24348	1.1027	1.31878	1.52796	1.21505	1.01233	2.45566	1.12587	1.15863	1.60897	1.48021	1.01162	1.37219	1.88719	1.43894	1.31679	1.28756	1.16658	2.59179		162.768	0.952558	1.68566	1.53303	1.24225	1.23032	1.37938	1.21894	1.37738	1.30179	2.24399	1.36588	1.56797	2.13773	1.55137	1.61749
181.25	1.14458	1.05855	1.35524	1.24661	1.08792	1.29694	1.48144	1.21059	1.01291	2.46251	1.12111	1.17855	1.64752	1.4765	1.00172	1.42467	2.04721	1.44266	1.34495	1.26588	1.15691	2.43832		163.331	0.948373	1.66706	1.56004	1.25063	1.26072	1.37328	1.2353	1.38837	1.28647	2.27343	1.37668	1.57748	2.21199	1.55449	1.59476
181.875	1.15195	1.06916	1.37122	1.3116	1.09147	1.26845	1.47327	1.21739	1.00808	2.48919	1.11082	1.19437	1.61592	1.45118	1.01435	1.46757	2.0163	1.46767	1.36694	1.3161	1.16777	2.28869		163.894	0.948478	1.64545	1.55862	1.2614	1.2439	1.37698	1.23338	1.37795	1.31112	2.20971	1.38937	1.56613	2.24975	1.56277	1.55573
182.5	1.15909	1.07839	1.3905	1.43136	1.12984	1.27427	1.45668	1.25412	1.00669	2.47757	1.10809	1.19984	1.56889	1.48699	1.03348	1.43277	2.00104	1.49558	1.37641	1.28197	1.20533	2.18242		164.457	0.946447	1.67024	1.55174	1.25538	1.22219	1.36886	1.30534	1.34105	1.31225	2.19316	1.396	1.55685	2.28508	1.54297	1.55072
183.125	1.15205	1.06999	1.4132	1.4314	1.15248	1.28966	1.46114	1.30503	1.01283	2.3952	1.11576	1.20393	1.57129	1.53876	1.03175	1.35749	1.9374	1.5226	1.39879	1.247	1.24436	2.13443		165.021	0.952445	1.64776	1.50999	1.24614	1.22407	1.35569	1.22525	1.32142	1.29293	2.19353	1.39267	1.54833	2.32869	1.55431	1.60013
183.75	1.14074	1.06792	1.42396	1.54082	1.13857	1.28815	1.47916	1.28684	1.01081	2.27268	1.11345	1.18985	1.56972	1.52104	1.02117	1.29298	1.91772	1.58991	1.42046	1.25327	1.25097	2.12315		165.584	0.953813	1.59966	1.50737	1.24506	1.23436	1.35627	1.25849	1.32911	1.33422	2.25301	1.41611	1.54107	2.31934	1.52422	1.5883
184.375	1.14975	1.06776	1.40277	1.56227	1.15178	1.29814	1.49545	1.2739	1.01249	2.17173	1.11917	1.16198	1.55938	1.48519	0.997161	1.27162	1.92082	1.68159	1.43848	1.26695	1.21731	2.15271		166.147	0.952011	1.59586	1.48452	1.24902	1.23864	1.34749	1.27802	1.32483	1.28647	2.20907	1.47249	1.50725	2.23637	1.50058	1.59784
185	1.15946	1.06783	1.36683	1.34269	1.19774	1.28761	1.505	1.25116	1.027	2.1605	1.11289	1.16438	1.54877	1.47424	0.993397	1.2555	1.96261	1.76553	1.45577	1.24775	1.18628	2.15369		166.71	0.972165	1.58401	1.42168	1.28388	1.23335	1.34028	1.30401	1.30069	1.29768	2.13937	1.4779	1.47766	2.17082	1.53877	1.54681
185.625	1.18421	1.06873	1.35221	1.3259	1.2306	1.29012	1.48242	1.23188	1.03755	2.10927	1.11242	1.15791	1.54387	1.48995	1.00662	1.23449	1.92387	1.8205	1.45247	1.26773	1.18628	2.15609		167.273	0.97408	1.60152	1.44658	1.26143	1.24081	1.34355	1.33135	1.3001	1.29981	2.11828	1.44207	1.48215	2.1777	1.54126	1.56318
186.25	1.22239	1.05208	1.35421	1.34154	1.16422	1.28478	1.47442	1.18892	1.0259	2.02652	1.12089	1.15422	1.55351	1.4793	1.02292	1.2073	1.93883	1.85886	1.40574	1.3011	1.1927	2.19624		167.837	0.942769	1.61248	1.45062	1.24385	1.24401	1.30473	1.30279	1.28411	1.27648	2.12691	1.39837	1.49272	2.32763	1.55179	1.55155
186.875	1.23573	1.04279	1.37047	1.31318	1.13202	1.27929	1.47399	1.1868	1.02125	1.97796	1.12499	1.16789	1.55435	1.47324	1.02789	1.20026	1.91365	1.90654	1.37664	1.26721	1.18644	2.22721		168.4	0.9428	1.61643	1.42071	1.2089	1.24288	1.29653	1.2735	1.26074	1.29318	2.1785	1.40411	1.53316	2.50968	1.56146	1.58037
187.5	1.22785	1.05438	1.37397	1.28993	1.10499	1.28255	1.45299	1.20665	1.02427	1.92318	1.12679	1.16315	1.54366	1.45142	1.03235	1.20401	2.05506	1.93209	1.3927	1.25539	1.18073	2.25164		168.963	0.941749	1.62892	1.41496	1.19772	1.21228	1.28145	1.24274	1.24817	1.31205	2.2403	1.38497	1.54433	2.66646	1.55164	1.57454
188.125	1.19453	1.05898	1.35812	1.24897	1.11218	1.28932	1.43692	1.19972	1.02303	1.86103	1.13165	1.1495	1.53413	1.42334	1.04027	1.22306	2.30454	1.94725	1.44327	1.27649	1.17456	2.30376		169.526	0.914568	1.63529	1.42558	1.21838	1.24004	1.26506	1.28919	1.23152	1.29934	2.29404	1.39571	1.53692	2.71186	1.53143	1.60842
188.75	1.17581	1.04848	1.34261	1.21267	1.10791	1.29074	1.42506	1.16771	1.02695	1.81573	1.14914	1.1584	1.532	1.4653	1.04729	1.24748	2.6281	1.99016	1.49024	1.25922	1.15884	2.30445		170.089	0.92814	1.63639	1.41208	1.20817	1.25012	1.24232	1.24016	1.22588	1.24662	2.26318	1.39252	1.54007	2.68639	1.51783	1.6188
189.375	1.17586	1.04997	1.34826	1.22429	1.10968	1.2853	1.41317	1.15343	1.03243	1.76186	1.16346	1.17181	1.53671	1.57976	1.03789	1.29036	2.52318	1.9387	1.49584	1.2518	1.14606	2.24308		170.653	0.940607	1.61297	1.41372	1.21033	1.25612	1.23892	1.2127	1.21703	1.25968	2.19583	1.39269	1.55522	2.68216	1.50174	1.61165
190	1.15959	1.05658	1.36731	1.23148	1.0849	1.26559	1.43113	1.14278	1.02299	1.67089	1.14836	1.1952	1.54842	1.80407	1.02547	1.31886	2.40658	1.78203	1.51032	1.25505	1.13381	2.2445		171.216	0.937813	1.55141	1.43024	1.18196	1.24214	1.22774	1.21955	1.20515	1.24446	2.1597	1.39218	1.54285	2.75593	1.50768	1.60268
190.625	1.14673	1.05796	1.38324	1.25195	1.07149	1.25259	1.45095	1.13232	1.01807	1.60197	1.12823	1.22755	1.52964	2.05971	1.00704	1.34221	2.39172	1.64184	1.57462	1.21795	1.1477	2.36213		171.779	0.948229	1.59475	1.39944	1.18465	1.23446	1.22409	1.23082	1.1954	1.25059	2.11601	1.39545	1.5316	2.86132	1.52218	1.6155
191.25	1.13858	1.05704	1.37817	1.2569	1.09262	1.25922	1.45794	1.1361	1.01668	1.60595	1.11695	1.23777	1.49423	1.96589	1.00841	1.38277	2.35174	1.57528	1.63899	1.22072	1.12426	2.4934		172.342	0.959902	1.55083	1.41172	1.19262	1.23976	1.22538	1.26261	1.19086	1.25137	2.12045	1.42355	1.51766	2.93348	1.53281	1.65808
191.875	1.12694	1.06316	1.36456	1.25493	1.09704	1.26649	1.44784	1.14511	1.01182	1.64218	1.10351	1.22794	1.49702	1.82504	1.01532	1.38267	2.37745	1.54084	1.60708	1.2403	1.12974	2.52583		172.905	0.933487	1.53517	1.40445	1.2041	1.22878	1.24074	1.23543	1.16452	1.27362	2.16751	1.43498	1.52517	2.95251	1.54681	1.63463
192.5	1.12254	1.05901	1.36548	1.27981	1.07097	1.25439	1.42817	1.15079	1.01227	1.68808	1.09819	1.23468	1.50554	1.75592	1.01454	1.34797	2.48142	1.53025	1.50856	1.25359	1.12876	2.37391		173.469	0.918867	1.52701	1.41137	1.18651	1.24853	1.23193	1.23271	1.16699	1.25955	2.18031	1.41927	1.50897	2.89014	1.52934	1.61458
193.125	1.13478	1.04602	1.34733	1.2471	1.08468	1.25333	1.41068	1.17003	1.0117	1.77496	1.11471	1.27088	1.51377	1.75302	1.00338	1.35378	2.61501	1.55337	1.4097	1.26695	1.10945	2.27117		174.032	0.928758	1.53524	1.4192	1.19276	1.23681	1.20045	1.22401	1.17092	1.2481	2.16214	1.40853	1.49159	2.81872	1.50204	1.57922
193.75	1.14687	1.03733	1.33716	1.23502	1.09614	1.26657	1.40692	1.20739	1.01515	1.86465	1.13563	1.26215	1.53519	1.80262	1.00783	1.37488	3.25005	1.58628	1.35559	1.28441	1.10244	2.27292		174.595	0.92242	1.53626	1.44829	1.19845	1.2526	1.19317	1.22649	1.17109	1.23928	2.1527	1.40994	1.48623	2.77672	1.50976	1.57
194.375	1.13079	1.04476	1.32929	1.21432	1.11532	1.27849	1.39677	1.22962	1.01139	1.87606	1.1291	1.20045	1.56498	1.81732	1.0152	1.33851	3.58808	1.63072	1.34615	1.29418	1.10987	2.37098		175.158	0.924233	1.55626	1.4342	1.20008	1.25511	1.18246	1.21686	1.18458	1.21669	2.12633	1.4277	1.47557	2.76953	1.51524	1.59944
195	1.12409	1.05688	1.30384	1.20667	1.12243	1.27494	1.3851	1.20569	1.00382	1.86517	1.11295	1.21621	1.58913	1.77633	1.00281	1.28511	3.56241	1.68466	1.3487	1.27631	1.10808	2.41413		175.722	0.949682	1.53858	1.45012	1.1699	1.2275	1.16246	1.191	1.17088	1.23017	2.07896	1.4056	1.45994	2.75915	1.51999	1.65618
195.625	1.13044	1.05022	1.30194	1.21659	1.1195	1.28305	1.38357	1.1792	1.00949	1.91898	1.10364	1.25413	1.57195	1.70658	0.997199	1.26729	3.40231	1.70926	1.32888	1.23762	1.12159	2.49498		176.285	0.948056	1.55101	1.44132	1.18757	1.21753	1.16569	1.19966	1.17619	1.24757	2.07605	1.41152	1.44668	2.75994	1.52117	1.75401
196.25	1.12166	1.03927	1.3198	1.23099	1.1187	1.27309	1.39416	1.14459	1.02678	1.98686	1.1248	1.28782	1.57757	1.72487	1.01278	1.21336	3.38637	1.7223	1.30216	1.22597	1.1264	2.43476		176.848	0.933178	1.53237	1.43188	1.1686	1.21259	1.15274	1.23082	1.17599	1.24975	2.07832	1.41949	1.44858	2.7787	1.50064	1.73131
196.875	1.10576	1.04527	1.33621	1.2201	1.117	1.28572	1.4043	1.15305	1.03555	2.01585	1.13167	1.29755	1.63354	1.76564	1.01981	1.15558	3.84932	1.7766	1.28466	1.21846	1.1264	2.33593		177.411	0.938626	1.55018	1.44832	1.17246	1.22581	1.13599	1.20301	1.17858	1.2158	2.06496	1.40327	1.46573	2.76263	1.5042	1.67895
197.5	1.09566	1.04693	1.33818	1.23477	1.11112	1.28874	1.41741	1.19402	1.04319	2.0278	1.13045	1.27898	1.71577	1.83003	1.02499	1.13545	3.91725	1.87503	1.27248	1.20456	1.1288	2.34651		177.974	0.948251	1.55554	1.44627	1.15193	1.18769	1.13347	1.18109	1.19502	1.20219	2.0482	1.40542	1.46453	2.72067	1.53635	1.66467
198.125	1.10217	1.03645	1.33843	1.26456	1.12057	1.30392	1.43633	1.23273	1.05559	2.13225	1.12547	1.25795	1.7232	1.89971	1.03638	1.12277	3.29814	1.94228	1.2632	1.21941	1.14105	2.51378		178.538	0.963943	1.5903	1.4733	1.15737	1.19923	1.11948	1.1857	1.19198	1.19993	2.06476	1.44541	1.47157	2.63361	1.54861	1.65462
198.75	1.10764	1.02795	1.34367	1.30348	1.14597	1.3363	1.44616	1.25629	1.06569	2.44699	1.11444	1.20154	1.72598	1.92383	1.03052	1.12012	3.17284	2.02147	1.27247	1.19458	1.1492	2.74911		179.101	0.963396	1.56968	1.46327	1.13319	1.19932	1.11815	1.17989	1.18875	1.22248	2.04625	1.43992	1.48861	2.57899	1.58102	1.64316
199.375	1.10906	1.02889	1.35374	1.26874	1.18259	1.34097	1.4378	1.25398	1.0592	2.64	1.11377	1.17462	1.76014	1.95594	1.04307	1.12113	3.39314	2.09798	1.28975	1.21296	1.15147	2.66486		179.664	0.957772	1.5467	1.45116	1.13848	1.22145	1.1095	1.19506	1.18923	1.22322	2.01574	1.43678	1.48154	2.61463	1.53702	1.60899
200	1.12562	1.03452	1.35364	1.26621	1.24358	1.36451	1.42776	1.22033	1.04444	2.47361	1.11684	1.15474	1.7854	1.92739	1.07008	1.11866	3.84387	2.12221	1.29213	1.22004	1.17157	2.41611		180.227	0.965365	1.56406	1.46453	1.11451	1.23068	1.10815	1.18799	1.17869	1.24469	2.02957	1.4159	1.50274	2.68038	1.56024	1.58587
200.625	1.1412	1.02924	1.35288	1.27289	1.23477	1.38275	1.41536	1.19419	1.03345	2.23902	1.10813	1.16744	1.80137	1.85749	1.12988	1.10163	3.84838	2.12849	1.30796	1.22122	1.15164	2.31032		180.79	0.950331	1.54621	1.44426	1.10982	1.21954	1.11637	1.20834	1.16674	1.21249	2.08488	1.39607	1.51917	2.70771	1.56492	1.59298
201.25	1.13882	1.02277	1.34552	1.25903	1.15345	1.37601	1.39131	1.19526	1.03382	2.00651	1.10806	1.18737	1.81121	1.79256	1.15499	1.11325	4.12636	2.13307	1.3458	1.22555	1.11506	2.26677		181.354	0.974998	1.54518	1.45329	1.13613	1.22346	1.11089	1.21223	1.17072	1.23612	2.07983	1.41567	1.53821	2.67741	1.54389	1.55296
201.875	1.13011	1.01927	1.34896	1.25835	1.09378	1.3764	1.37927	1.22726	1.03889	1.93365	1.10648	1.22269	1.79678	1.7814	1.15195	1.12581	4.39653	2.14288	1.37819	1.21213	1.07427	2.19805		181.917	0.986105	1.5599	1.47734	1.15999	1.18257	1.0952	1.18675	1.16259	1.25818	2.10956	1.4176	1.53528	2.66391	1.51925	1.51495
202.5	1.13701	1.02051	1.33839	1.25371	1.06825	1.40469	1.38371	1.22275	1.04923	1.95611	1.09579	1.24237	1.74435	1.7495	1.15891	1.12046	4.12654	2.18825	1.34763	1.23516	1.08538	2.22623		182.48	0.976018	1.5124	1.41247	1.1227	1.17194	1.0746	1.19219	1.15226	1.27664	2.22102	1.42079	1.54361	2.61963	1.52147	1.54087
203.125	1.14176	1.03003	1.32591	1.23857	1.06545	1.44348	1.37772	1.21386	1.0617	2.00066	1.0934	1.23253	1.66886	1.71524	1.14369	1.11074	3.42897	2.2553	1.32015	1.25716	1.08018	2.2812		183.043	0.954813	1.52749	1.39517	1.12533	1.18405	1.07048	1.18164	1.14849	1.26254	2.28603	1.40811	1.5349	2.56791	1.52675	1.53161
203.75	1.14568	1.03603	1.31231	1.23951	1.07125	1.44148	1.36352	1.23827	1.07536	2.02883	1.10076	1.24659	1.65886	1.65283	1.12454	1.10119	3.16138	2.29579	1.3138	1.27741	1.07262	2.44825		183.606	0.94384	1.55258	1.33538	1.14976	1.18508	1.06031	1.20475	1.15187	1.27932	2.27621	1.38899	1.51939	2.5947	1.52959	1.52104
204.375	1.11624	1.04506	1.31181	1.27003	1.07311	1.40886	1.34124	1.25173	1.08925	2.0047	1.10809	1.25471	1.7272	1.67974	1.09889	1.11089	3.18485	2.32257	1.30368	1.29189	1.07368	2.63593		184.17	0.941686	1.5448	1.31789	1.1212	1.18765	1.07507	1.21168	1.16118	1.2997	2.2455	1.39102	1.51981	2.69925	1.50408	1.50257
205	1.10917	1.04578	1.30378	1.28211	1.05779	1.36831	1.33506	1.24722	1.11683	1.93632	1.10487	1.23448	1.8705	1.68001	1.07611	1.13488	3.06025	2.29433	1.31369	1.27017	1.10093	3.04574		184.733	0.956193	1.54814	1.32482	1.13654	1.18798	1.07867	1.2234	1.13556	1.2588	2.19661	1.42524	1.50139	2.84931	1.46456	1.52139
205.625	1.11875	1.05455	1.33571	1.27963	1.05048	1.35342	1.34473	1.27642	1.15248	1.85112	1.08977	1.19602	1.98577	1.66018	1.06772	1.15543	3.29726	2.26161	1.34335	1.27526	1.11477	3.42327		185.296	0.958429	1.57338	1.30336	1.14907	1.16617	1.04671	1.22371	1.13306	1.27144	2.15586	1.46452	1.4863	3.09731	1.45705	1.49917
206.25	1.1264	1.0609	1.37643	1.26598	1.05883	1.37698	1.33912	1.2864	1.1769	1.79685	1.09797	1.17171	2.02288	1.60114	1.07619	1.17128	3.72174	2.27972	1.31928	1.29529	1.11305	3.06155		185.859	0.942874	1.55649	1.29954	1.11647	1.1532	1.04539	1.23301	1.12512	1.27634	2.13404	1.451	1.50133	3.32781	1.47957	1.54519
206.875	1.11995	1.06218	1.38367	1.28107	1.04838	1.37096	1.3234	1.27038	1.15926	1.81317	1.11425	1.16284	2.01296	1.6003	1.08204	1.18079	3.99365	2.26252	1.29879	1.32282	1.1131	2.83977		186.423	0.950507	1.62557	1.27955	1.13052	1.16685	1.05457	1.23639	1.12414	1.29264	2.12329	1.43608	1.51114	3.4169	1.49194	1.57112
207.5	1.11237	1.0642	1.38711	1.27964	1.05273	1.36163	1.31863	1.28321	1.13365	1.87232	1.12739	1.16743	1.99444	1.61516	1.06072	1.17014	4.05759	2.20853	1.32028	1.36944	1.11381	2.74871		186.986	0.955411	1.5896	1.2558	1.11216	1.18817	1.06221	1.22321	1.12523	1.27076	2.09402	1.4493	1.52604	3.42308	1.52816	1.58092
208.125	1.11188	1.06885	1.38869	1.29403	1.06871	1.35006	1.31103	1.27755	1.12707	1.88399	1.14158	1.18194	2.00027	1.61866	1.05139	1.1485	3.93863	2.19671	1.31675	1.33144	1.11538	2.72735		187.549	0.948744	1.55461	1.25455	1.08958	1.18389	1.05204	1.2526	1.11488	1.28503	2.07543	1.45638	1.52488	3.30675	1.54136	1.59116
208.75	1.11307	1.0835	1.40328	1.28194	1.08853	1.33168	1.30199	1.29257	1.13197	1.84775	1.14408	1.18571	2.09644	1.69796	1.05775	1.1155	4.06559	2.21989	1.30887	1.2983	1.13069	2.64075		188.112	0.936391	1.56807	1.21326	1.06971	1.16998	1.03656	1.2129	1.10329	1.27202	2.12763	1.4096	1.52448	3.18955	1.52846	1.59303
209.375	1.12174	1.09484	1.40864	1.25473	1.08223	1.32175	1.31549	1.31257	1.12773	1.77161	1.13925	1.17874	2.1428	1.74337	1.06591	1.09429	4.14662	2.17317	1.30664	1.27981	1.1219	2.59699		188.675	0.932447	1.5607	1.22595	1.07626	1.15597	1.03609	1.2341	1.10781	1.23988	2.14454	1.43415	1.53975	3.16306	1.52528	1.59379
210	1.11029	1.06896	1.40469	1.25333	1.10471	1.3369	1.3027	1.36084	1.11626	1.70134	1.14427	1.21161	2.09851	1.74693	1.05942	1.08861	3.77294	2.09716	1.3068	1.28822	1.10019	2.70028		189.239	0.92412	1.54976	1.22181	1.07578	1.17404	1.02814	1.2112	1.09989	1.26054	2.16774	1.41833	1.51571	3.12466	1.54209	1.6174
210.625	1.1199	1.05569	1.37243	1.25514	1.0901	1.33562	1.27753	1.39366	1.11613	1.67488	1.13469	1.28371	2.06157	1.80896	1.06647	1.09124	3.05412	2.08691	1.34491	1.32055	1.10471	2.78676		189.802	0.944769	1.52336	1.21966	1.06362	1.19295	1.01478	1.23787	1.09703	1.29552	2.22161	1.40585	1.49085	3.02473	1.55801	1.60565
211.25	1.1258	1.05124	1.34783	1.28157	1.063	1.32606	1.27378	1.38181	1.11648	1.67411	1.13188	1.31782	2.04151	1.8567	1.06429	1.09986	2.82745	2.10764	1.4491	1.34297	1.12734	2.64693		190.365	0.966952	1.53578	1.22037	1.08516	1.18414	1.0036	1.24642	1.08919	1.29299	2.28326	1.37502	1.47773	2.93088	1.5532	1.61979
211.875	1.13853	1.0535	1.34334	1.31099	1.05374	1.35467	1.29387	1.37563	1.1116	1.69494	1.10388	1.31368	1.99749	2.02039	1.06955	1.11023	2.74906	2.10615	1.54292	1.36586	1.15302	2.43385		190.928	0.974389	1.54683	1.18787	1.07989	1.21154	1.00048	1.23858	1.08222	1.28193	2.39309	1.38299	1.50437	2.82622	1.50007	1.61657
212.5	1.14794	1.0515	1.34954	1.33143	1.04369	1.36192	1.30882	1.38428	1.10566	1.73366	1.09936	1.3029	1.96557	2.18545	1.07488	1.11391	2.82105	2.10164	1.54422	1.36178	1.18282	2.31045		191.491	0.960203	1.57248	1.19599	1.07905	1.20293	1.00154	1.23183	1.063	1.28726	2.45408	1.39659	1.53602	2.72563	1.51408	1.6145
213.125	1.14042	1.0561	1.34447	1.3515	1.04887	1.38322	1.2926	1.33531	1.10612	1.74064	1.09252	1.3017	1.92406	2.34459	1.06085	1.12907	2.86773	2.09986	1.47057	1.36281	1.17113	2.3164		192.055	0.953247	1.57137	1.19992	1.09045	1.19664	1.00964	1.23458	1.05274	1.26486	2.47536	1.38955	1.52248	2.64102	1.50511	1.59174
213.75	1.12654	1.05476	1.34003	1.38828	1.03917	1.37199	1.28532	1.32531	1.09077	1.75308	1.09096	1.26684	1.92379	2.50281	1.0508	1.15719	2.87811	2.10018	1.43082	1.3692	1.15905	2.37385		192.618	0.940987	1.59439	1.20345	1.08026	1.18592	1.00613	1.25538	1.04302	1.25051	2.437	1.41681	1.50056	2.6302	1.54781	1.60556
214.375	1.12734	1.04433	1.34756	1.36239	1.0412	1.36017	1.29354	1.28175	1.07653	1.83261	1.09512	1.21829	1.94022	2.50956	1.07581	1.17766	2.8061	2.13451	1.40375	1.36293	1.1565	2.31102		193.181	0.937391	1.57376	1.2128	1.06392	1.20733	1.02166	1.21507	1.02855	1.30467	2.38151	1.46832	1.51929	2.71174	1.57178	1.59483
215	1.13706	1.04292	1.36546	1.2755	1.05551	1.36483	1.30488	1.26219	1.07373	1.92757	1.1107	1.20711	1.91437	2.44447	1.0962	1.21959	2.77095	2.19089	1.37251	1.38478	1.17648	2.22262		193.744	0.941627	1.57327	1.2347	1.06064	1.18371	1.02553	1.24062	1.02338	1.25386	2.41422	1.45034	1.53198	2.83471	1.56731	1.59941
215.625	1.11371	1.05543	1.35789	1.27865	1.07392	1.3761	1.30636	1.28038	1.06536	1.91048	1.09257	1.20594	1.86157	2.27201	1.09705	1.25957	3.01384	2.26234	1.36982	1.41409	1.23394	2.1407		194.307	0.943378	1.57519	1.23017	1.07839	1.19306	1.01425	1.25172	1.02578	1.27736	2.37448	1.46206	1.5331	2.88423	1.56284	1.64237
216.25	1.10946	1.06466	1.3482	1.27934	1.07011	1.3961	1.29704	1.26553	1.05394	1.82949	1.09424	1.21631	1.83351	2.22861	1.09309	1.2839	3.28264	2.39523	1.39026	1.38906	1.27504	2.17553		194.871	0.957791	1.56318	1.23203	1.05168	1.20865	1.01335	1.22701	1.03309	1.2816	2.34677	1.46613	1.50764	2.85703	1.53501	1.60754
216.875	1.11047	1.0608	1.33815	1.28181	1.08253	1.4158	1.29192	1.25203	1.05079	1.78514	1.09033	1.20347	1.83898	2.10479	1.06707	1.29268	3.0236	2.51021	1.40814	1.34797	1.27968	2.29892		195.434	0.918824	1.55967	1.2685	1.03957	1.20521	1.01534	1.23637	1.05004	1.28382	2.34186	1.46831	1.48634	2.83467	1.50761	1.60605
217.5	1.1058	1.05545	1.34081	1.29124	1.07562	1.4596	1.28651	1.27421	1.06463	1.77338	1.08714	1.19138	1.90834	1.95247	1.05089	1.33089	2.76003	2.5141	1.39735	1.32115	1.31847	2.416		195.997	0.92884	1.55016	1.24146	1.03088	1.20764	1.0299	1.24146	1.07075	1.27021	2.35971	1.46384	1.49927	2.82745	1.49943	1.60261
218.125	1.1203	1.04292	1.34059	1.30619	1.06599	1.41803	1.28537	1.27751	1.07558	1.74588	1.08469	1.18845	1.98931	1.9395	1.06029	1.34803	2.85925	2.47439	1.37471	1.29551	1.30333	2.48154		196.56	0.9438	1.55544	1.23942	1.02944	1.22977	1.05249	1.19764	1.07913	1.28516	2.40563	1.45495	1.5187	2.82309	1.50248	1.58124
218.75	1.12934	1.03786	1.34344	1.31822	1.06533	1.34207	1.28235	1.2931	1.07828	1.72439	1.07431	1.21619	1.96817	1.99356	1.08709	1.29144	2.92554	2.47743	1.3648	1.27189	1.24146	2.5727		197.123	0.942553	1.54998	1.27208	1.00716	1.22665	1.0481	1.20668	1.07066	1.25939	2.44622	1.4502	1.50315	2.79415	1.50995	1.56212
219.375	1.14662	1.04934	1.34522	1.31203	1.08096	1.32019	1.29024	1.29988	1.08398	1.73173	1.07479	1.23471	1.87935	1.99235	1.1213	1.23593	2.55341	2.59873	1.37915	1.27794	1.19279	2.64182		197.687	0.947951	1.53456	1.29669	1.03324	1.20666	1.05281	1.2046	1.06941	1.23818	2.40753	1.44516	1.4905	2.78169	1.51647	1.58663
220	1.1424	1.05771	1.35332	1.31094	1.07063	1.31019	1.29476	1.26963	1.08963	1.7578	1.08423	1.23346	1.85057	1.99929	1.1317	1.19987	2.56342	2.81373	1.39229	1.27923	1.17213	2.7852		198.25	0.937876	1.55824	1.30585	1.03646	1.21019	1.03301	1.20622	1.07867	1.23408	2.42465	1.41549	1.46995	2.83201	1.51381	1.61498
220.625	1.137	1.06384	1.3483	1.30797	1.07396	1.30868	1.28078	1.24265	1.07344	1.77999	1.09417	1.25276	1.87191	1.97368	1.16619	1.19711	2.64773	2.87391	1.39449	1.30368	1.18023	2.95309		198.813	0.931064	1.52787	1.31176	1.04022	1.20758	1.0251	1.23322	1.09234	1.25489	2.3838	1.42606	1.48443	2.91488	1.51383	1.63671
221.25	1.1368	1.06824	1.34996	1.29216	1.08014	1.30981	1.26846	1.23679	1.05139	1.81078	1.09743	1.25276	1.90286	1.9898	1.25142	1.23347	2.86977	2.83833	1.38714	1.28105	1.15205	2.8891		199.376	0.914826	1.55294	1.28966	1.05735	1.20722	1.02136	1.25147	1.10082	1.26451	2.43743	1.4423	1.46557	2.95795	1.51041	1.60671
221.875	1.12714	1.0884	1.34813	1.29889	1.08971	1.30231	1.28284	1.27429	1.0404	1.87	1.0866	1.27157	1.89366	2.06996	1.29581	1.282	2.8447	2.79699	1.37791	1.29822	1.14602	2.85977		199.94	0.90402	1.57311	1.24305	1.07303	1.21167	1.01847	1.25393	1.10495	1.24276	2.47457	1.44628	1.43209	3.02788	1.53635	1.59584
222.5	1.12047	1.10509	1.33121	1.28436	1.08726	1.28272	1.29144	1.34212	1.03451	1.94463	1.08674	1.26747	1.8889	2.25246	1.22583	1.29822	2.77003	2.68274	1.38246	1.30495	1.17559	2.8788		200.503	0.907451	1.55742	1.26492	1.06834	1.24299	1.0447	1.24398	1.0983	1.23595	2.41896	1.43329	1.42726	3.11908	1.5496	1.61993
223.125	1.11485	1.09677	1.32474	1.28029	1.07394	1.28828	1.29447	1.36955	1.03854	1.99563	1.08376	1.1996	1.90789	2.41603	1.18393	1.36926	2.37885	2.64626	1.4025	1.31201	1.1884	2.78041		201.066	0.913829	1.54881	1.25282	1.0472	1.2291	1.05252	1.26278	1.10906	1.20791	2.37568	1.44498	1.42976	3.13488	1.54676	1.62384
223.75	1.103	1.06759	1.31967	1.28303	1.07183	1.28671	1.30477	1.36474	1.04218	2.05749	1.085	1.12144	1.88144	2.33769	1.19419	1.49939	2.76821	2.78763	1.45221	1.32319	1.2073	2.68036		201.629	0.921587	1.54635	1.23907	1.03878	1.23869	1.06252	1.24358	1.10675	1.20143	2.38903	1.45998	1.43074	3.04261	1.55276	1.63281
224.375	1.09824	1.05672	1.31073	1.29298	1.07511	1.28062	1.30898	1.35444	1.045	2.19472	1.08695	1.10477	1.85405	2.01652	1.18161	1.53199	3.42777	2.93481	1.46899	1.33832	1.2321	2.68642		202.192	0.919586	1.5545	1.26868	1.0476	1.25003	1.04798	1.22918	1.1	1.21118	2.37781	1.4789	1.43629	2.96543	1.58901	1.6366
225	1.09344	1.06459	1.31336	1.34064	1.07608	1.28815	1.32189	1.32626	1.06238	2.40599	1.1041	1.11768	1.87214	1.9536	1.14717	1.47882	3.09826	2.90249	1.4555	1.31021	1.19129	2.62571		202.756	0.910355	1.64986	1.27339	1.05172	1.26164	1.04059	1.20195	1.09807	1.24547	2.32044	1.46794	1.4452	2.89998	1.57484	1.64442
225.625	1.09908	1.06958	1.32468	1.3234	1.08097	1.2836	1.33175	1.32406	1.07269	2.52808	1.1346	1.13561	1.91716	1.95589	1.10899	1.40873	3.00242	2.9047	1.45957	1.32372	1.18645	2.58498		203.319	0.921462	1.64336	1.24237	1.04589	1.23211	1.02866	1.22826	1.08751	1.22879	2.23915	1.49591	1.46767	2.89528	1.58254	1.63033
226.25	1.09456	1.05849	1.31789	1.30291	1.09072	1.31393	1.34529	1.32029	1.06647	2.53838	1.12485	1.13894	1.9615	2.10921	1.10206	1.3694	3.3725	2.96075	1.48977	1.33884	1.18867	2.62339		203.882	0.899733	1.65544	1.22774	1.02621	1.24303	1.04457	1.23461	1.08722	1.23692	2.24545	1.5387	1.46334	2.93255	1.61588	1.5841
226.875	1.09131	1.04417	1.3138	1.3145	1.10473	1.31991	1.35169	1.34605	1.06453	2.477	1.12282	1.1446	1.9848	2.21239	1.09104	1.34377	3.96743	2.98018	1.5158	1.35633	1.2218	2.64801		204.445	0.893273	1.64981	1.19801	1.02361	1.23589	1.04624	1.25071	1.08847	1.23492	2.25582	1.55875	1.46952	3.06734	1.61775	1.56041
227.5	1.07804	1.0349	1.30967	1.31503	1.08913	1.29239	1.35499	1.35429	1.06374	2.33689	1.15549	1.1415	1.95852	2.2285	1.08098	1.31287	3.85791	3.00304	1.57228	1.34904	1.23159	2.70272		205.008	0.894097	1.61427	1.1984	1.03211	1.23169	1.05033	1.22472	1.07935	1.22534	2.27302	1.53559	1.4835	3.20421	1.59159	1.58881
228.125	1.07067	1.02565	1.29568	1.32233	1.08283	1.26811	1.36988	1.38506	1.06234	2.154	1.172	1.1551	1.92634	2.17205	1.08996	1.28565	3.82726	3.05083	1.63602	1.37403	1.26129	2.7901		205.572	0.899435	1.6247	1.19623	1.01297	1.25254	1.04847	1.22634	1.07681	1.22985	2.33209	1.53238	1.49805	3.25407	1.6506	1.63275
228.75	1.06368	1.02535	1.29337	1.31271	1.09835	1.26645	1.37123	1.36938	1.05251	2.1036	1.16811	1.14653	1.86231	2.27984	1.10919	1.27727	4.25619	3.15403	1.67393	1.40516	1.25939	2.69923		206.135	0.909429	1.60515	1.18774	1.03669	1.22095	1.03478	1.22182	1.06961	1.2398	2.35171	1.54504	1.51664	3.15629	1.6551	1.65556
229.375	1.08089	1.02771	1.30802	1.31775	1.11586	1.28205	1.36029	1.38437	1.05757	2.06966	1.16068	1.15436	1.78907	2.24652	1.13854	1.27317	4.62591	3.2946	1.64756	1.3569	1.27569	2.69137		206.698	0.922947	1.56358	1.17872	1.04503	1.20344	1.0251	1.24968	1.07484	1.22468	2.33269	1.503	1.50325	2.97758	1.57979	1.70755
230	1.096	1.0293	1.32406	1.32241	1.13727	1.29376	1.37348	1.47263	1.06675	2.04464	1.1473	1.19356	1.73238	2.04224	1.15988	1.24656	4.49213	3.39225	1.59026	1.32859	1.28652	2.86836		207.261	0.911253	1.58361	1.18322	1.0147	1.20709	1.01354	1.23986	1.08319	1.18587	2.27244	1.51508	1.48065	2.84588	1.58464	1.77516
230.625	1.08042	1.02401	1.33068	1.33922	1.11053	1.2974	1.41363	1.60021	1.0627	2.09951	1.14887	1.2235	1.71962	2.00977	1.18105	1.24438	4.46086	3.44007	1.5541	1.35215	1.297	2.99081		207.824	0.909635	1.56796	1.1632	1.0337	1.19277	1.00463	1.2443	1.08419	1.20081	2.27918	1.53675	1.46681	2.84771	1.58674	1.78386
231.25	1.07492	1.01736	1.35046	1.33348	1.11344	1.2741	1.41135	1.71026	1.05461	2.15902	1.15182	1.21167	1.76725	1.97292	1.17431	1.25699	4.47614	3.45752	1.55519	1.38049	1.30446	3.03417		208.388	0.909315	1.56507	1.15163	1.0348	1.19727	1.00146	1.28664	1.07186	1.1659	2.33342	1.50955	1.4751	2.98269	1.58385	1.72434
231.875	1.0665	1.03795	1.35504	1.32134	1.15085	1.2684	1.40205	1.91313	1.05003	2.17726	1.15412	1.20731	1.84706	1.92392	1.16252	1.22963	4.14657	3.30639	1.56497	1.36227	1.27021	3.1052		208.951	0.931127	1.52318	1.15434	1.04583	1.19324	0.996657	1.30552	1.06755	1.17369	2.33885	1.4819	1.48883	3.14855	1.61951	1.63161
232.5	1.07794	1.04191	1.35541	1.31901	1.12832	1.27428	1.39061	2.07708	1.05121	2.08617	1.14269	1.20623	1.92962	1.95678	1.16579	1.21361	3.9144	3.09951	1.57108	1.36973	1.2536	3.02433		209.514	0.946005	1.55062	1.16156	1.02683	1.21301	0.997426	1.25668	1.05744	1.18669	2.34869	1.50299	1.4818	3.40663	1.62128	1.62544
233.125	1.09709	1.04825	1.37188	1.29616	1.11185	1.2689	1.39146	2.02303	1.04283	1.99435	1.1329	1.21285	1.96083	1.89265	1.15854	1.21216	3.77814	2.97691	1.57079	1.42871	1.25961	2.9529		210.077	0.953442	1.59089	1.16814	1.02667	1.20794	0.998179	1.2907	1.05169	1.21208	2.35423	1.56083	1.49905	3.95948	1.62994	1.63021
233.75	1.09254	1.04906	1.372	1.27745	1.13324	1.29989	1.3795	1.79764	1.03097	1.92965	1.1222	1.20686	2.01685	1.79771	1.15169	1.22698	3.37563	2.95739	1.57194	1.45181	1.23551	2.77539		210.641	0.950034	1.63469	1.16295	1.00953	1.20434	1.01351	1.25938	1.05281	1.22351	2.35913	1.63489	1.51111	4.82202	1.63507	1.65914
234.375	1.09097	1.05245	1.35622	1.27079	1.14755	1.30433	1.34433	1.6958	1.0376	1.92437	1.12002	1.2197	2.0942	1.76247	1.1541	1.21289	3.27966	2.92694	1.55189	1.39314	1.22227	2.68237		211.204	0.952187	1.58676	1.15898	1.02713	1.2246	1.01951	1.26435	1.06364	1.21737	2.34223	1.58374	1.50748	5.54136	1.62398	1.64316
235	1.09957	1.05585	1.35823	1.29844	1.14946	1.29556	1.32935	1.70723	1.04734	2.00448	1.1224	1.21767	2.14927	1.8199	1.1573	1.18239	3.29296	2.82787	1.53629	1.38234	1.22495	2.81255		211.767	0.970927	1.56165	1.15033	1.01845	1.18771	1.00981	1.26282	1.06709	1.21521	2.34746	1.53467	1.52306	5.55424	1.6116	1.61405
235.625	1.10511	1.05886	1.37284	1.31431	1.13442	1.2831	1.3427	1.67908	1.06732	2.06303	1.13494	1.20778	2.18715	1.92362	1.20227	1.1746	3.2093	2.78145	1.53484	1.37428	1.22072	3.11354		212.33	0.971349	1.59328	1.15079	0.998922	1.18371	1.00846	1.28031	1.04711	1.25306	2.42619	1.55477	1.52335	5.29243	1.60894	1.55237
236.25	1.11791	1.06292	1.37551	1.33307	1.14287	1.28747	1.3792	1.5874	1.0899	2.09401	1.13516	1.21915	2.285	1.92799	1.25207	1.21988	3.39836	2.85087	1.52761	1.38521	1.24251	3.08605		212.893	0.981376	1.60403	1.16058	0.997569	1.18937	1.02039	1.26678	1.04136	1.29251	2.4412	1.54096	1.497	5.15446	1.63576	1.55085
236.875	1.12017	1.05573	1.36997	1.30617	1.1484	1.30227	1.3875	1.55093	1.10898	2.11362	1.14266	1.22866	2.40696	1.95718	1.20494	1.27676	3.57441	2.97548	1.52403	1.34636	1.24445	3.24774		213.457	0.980685	1.57667	1.16076	1.00236	1.19217	1.01632	1.255	1.04658	1.25621	2.49612	1.55519	1.49191	5.15879	1.66549	1.50924
237.5	1.11846	1.06173	1.36619	1.30453	1.16223	1.29816	1.35956	1.61631	1.11287	2.10635	1.15051	1.23411	2.32769	2.0059	1.14726	1.3315	3.76218	3.06172	1.5269	1.32136	1.23506	3.20811		214.02	0.970867	1.58395	1.17345	1.00166	1.18809	1.01026	1.22813	1.04904	1.25654	2.53786	1.57878	1.49526	5.08694	1.72933	1.52285
238.125	1.13264	1.06244	1.36752	1.29271	1.14663	1.31647	1.34991	1.66469	1.10096	2.16186	1.14646	1.28516	2.25445	2.02175	1.13003	1.34312	3.80393	3.06371	1.54296	1.30875	1.23735	3.00097		214.583	0.960214	1.55814	1.20271	1.00263	1.19628	1.01352	1.21082	1.05819	1.24371	2.54171	1.61702	1.47426	4.75665	1.71751	1.53434
238.75	1.13072	1.05289	1.3786	1.28935	1.14404	1.30114	1.33345	1.61662	1.08249	2.25141	1.15551	1.32723	2.22535	2.1604	1.16325	1.34139	4.31142	3.03967	1.53176	1.29288	1.2505	2.89713		215.146	0.964489	1.55051	1.19803	1.00943	1.19713	1.02513	1.2312	1.05501	1.207	2.46901	1.68934	1.47579	4.39681	1.73322	1.538
239.375	1.10608	1.03952	1.38716	1.27784	1.13487	1.31727	1.29996	1.62373	1.06588	2.36766	1.15796	1.35971	2.2637	2.31978	1.2589	1.38505	4.78055	3.05519	1.50773	1.306	1.25108	2.80104		215.709	0.94208	1.59759	1.18436	1.01462	1.21509	1.02392	1.23595	1.05106	1.20976	2.38578	1.7297	1.48636	4.10078	1.74179	1.56047
240	1.11334	1.04121	1.38283	1.28763	1.10676	1.31626	1.28833	1.60884	1.05407	2.43556	1.13684	1.40144	2.32996	2.29033	1.36658	1.46737	4.98103	3.13646	1.50222	1.303	1.2323	3.02777		216.273	0.966827	1.55572	1.17963	1.0298	1.204	1.03669	1.26638	1.04513	1.23939	2.2904	1.69165	1.48918	3.86394	1.71843	1.59502
240.625	1.10911	1.04888	1.3622	1.28792	1.09604	1.33109	1.29365	1.58509	1.05686	2.37967	1.13044	1.5096	2.33284	2.11406	1.43273	1.53141	4.48673	3.17786	1.50462	1.26187	1.22208	3.13726		216.836	0.961356	1.56047	1.19721	0.978555	1.20977	1.04442	1.28364	1.03198	1.28485	2.24971	1.63347	1.47577	3.63092	1.68093	1.6099
241.25	1.09486	1.05191	1.37409	1.30686	1.1279	1.32593	1.30268	1.5536	1.06349	2.36516	1.16067	1.56212	2.25229	2.09902	1.3792	1.51773	4.41199	3.12192	1.50886	1.25541	1.22304	3.26008		217.399	0.946818	1.54165	1.21063	0.997214	1.21281	1.042	1.27684	1.03521	1.24759	2.23461	1.64571	1.48251	3.48653	1.68774	1.5885
241.875	1.09463	1.05161	1.36431	1.33643	1.14942	1.32456	1.30596	1.51226	1.06881	2.40487	1.19982	1.43541	2.20699	2.25679	1.29372	1.44431	5.03558	3.04949	1.4988	1.28213	1.23545	3.36926		217.962	0.95608	1.54632	1.20738	1.00226	1.21214	1.04521	1.25931	1.03566	1.26402	2.24568	1.70619	1.48234	3.51259	1.68316	1.59315
242.5	1.1001	1.06394	1.34771	1.32461	1.127	1.32759	1.31023	1.45526	1.07624	2.52886	1.19416	1.28502	2.21218	2.20569	1.27266	1.38922	5.83748	3.10921	1.47105	1.26605	1.22713	3.35554		218.525	0.967003	1.55642	1.23465	0.998045	1.24638	1.05254	1.25561	1.03905	1.25269	2.26078	1.77666	1.47956	3.58938	1.69578	1.56853
243.125	1.10219	1.07455	1.35274	1.36479	1.13534	1.32459	1.32378	1.46495	1.08648	2.83601	1.17774	1.22919	2.18714	2.25267	1.24623	1.36493	5.98453	3.41593	1.44531	1.28421	1.20745	3.44817		219.089	0.951878	1.5564	1.20935	0.988936	1.2227	1.05661	1.25014	1.0358	1.23858	2.29029	1.79863	1.52085	3.58484	1.66046	1.54533
243.75	1.10136	1.08051	1.36575	1.36083	1.14204	1.30454	1.32123	1.47487	1.08827	3.23974	1.1689	1.21302	2.18405	2.43088	1.20551	1.32454	6.38183	3.7052	1.41039	1.29676	1.23292	3.50025		219.652	0.92886	1.55029	1.21168	0.975012	1.19581	1.06761	1.28807	1.01877	1.21379	2.38076	1.72126	1.51374	3.62731	1.63491	1.51456
244.375	1.1163	1.06916	1.38282	1.37601	1.13304	1.28459	1.29009	1.47148	1.07914	3.40589	1.15745	1.23112	2.18233	2.44168	1.18923	1.25681	6.62946	3.68318	1.35942	1.26909	1.32266	4.00521		220.215	0.933331	1.54144	1.20884	0.982831	1.21507	1.07652	1.27003	1.01772	1.23427	2.45297	1.60781	1.51256	3.75713	1.62848	1.50757
245	1.1544	1.04922	1.40741	1.36236	1.13962	1.26602	1.26941	1.47765	1.07057	3.22927	1.14246	1.23637	2.16377	2.3339	1.19919	1.23232	6.62003	3.53213	1.33901	1.28806	1.35691	3.99702		220.778	0.944316	1.54716	1.18994	0.984918	1.22855	1.09286	1.25578	1.01132	1.22937	2.41377	1.52726	1.48574	3.9153	1.60074	1.5097
245.625	1.15736	1.03692	1.43145	1.35185	1.14706	1.28958	1.26783	1.47311	1.06781	2.97762	1.12284	1.27879	2.17171	2.28762	1.22115	1.21326	6.06675	3.36095	1.34139	1.28717	1.37404	4.03435		221.342	0.924491	1.57469	1.17517	0.971177	1.19172	1.10332	1.24369	1.01815	1.23848	2.40521	1.45612	1.47786	3.9388	1.58196	1.5061
246.25	1.14771	1.04001	1.42858	1.36293	1.1499	1.27241	1.26821	1.493	1.06278	2.95995	1.10723	1.25113	2.24724	2.20524	1.19613	1.16353	6.02255	3.16747	1.3516	1.23506	1.39509	4.39002		221.905	0.928871	1.57749	1.17916	0.949417	1.20253	1.08548	1.27069	1.02449	1.25341	2.45495	1.42474	1.4983	3.84479	1.60247	1.49045
246.875	1.13597	1.0465	1.38338	1.36494	1.14997	1.25754	1.27461	1.48422	1.04509	3.021	1.10489	1.20082	2.37295	2.14201	1.18005	1.13518	6.17019	3.08566	1.36669	1.20228	1.46127	4.14997		222.468	0.923182	1.5807	1.16428	0.963421	1.19403	1.09117	1.27317	1.02065	1.23371	2.49783	1.39154	1.50786	3.73962	1.6105	1.54984
247.5	1.13831	1.05303	1.34505	1.36928	1.1576	1.27284	1.28084	1.44632	1.03363	3.12596	1.09888	1.16383	2.45828	2.11274	1.19431	1.12055	6.12892	3.04847	1.34472	1.21945	1.47742	4.05827		223.031	0.92376	1.59086	1.16064	0.96897	1.20631	1.0952	1.30218	1.01956	1.22777	2.49302	1.38198	1.51505	3.68214	1.62361	1.59933
248.125	1.1351	1.05544	1.33747	1.33687	1.16257	1.27117	1.27167	1.50402	1.0299	3.28133	1.10122	1.1845	2.47489	2.03539	1.20114	1.1165	5.98311	3.04608	1.32352	1.23027	1.45172	3.68775		223.594	0.927593	1.6265	1.15098	0.967319	1.23797	1.08085	1.30149	1.03037	1.22635	2.51546	1.41789	1.52122	3.70029	1.62741	1.66781
248.75	1.1488	1.05495	1.33964	1.29432	1.16411	1.2628	1.26562	1.54281	1.0219	3.40618	1.10447	1.22293	2.4939	2.05371	1.19726	1.13919	5.68803	3.17428	1.32308	1.20686	1.40513	3.69906		224.158	0.936907	1.66833	1.1457	0.967302	1.22381	1.08986	1.28616	1.03575	1.23926	2.53749	1.47131	1.52402	3.65819	1.66729	1.70017
249.375	1.13454	1.05772	1.33559	1.30328	1.20717	1.2587	1.26567	1.50726	1.01875	3.46808	1.09301	1.23187	2.572	2.08675	1.22126	1.15845	5.47256	3.30047	1.31624	1.22513	1.3686	3.74828		224.721	0.946602	1.65385	1.1459	0.962756	1.23178	1.09017	1.34453	1.04259	1.23359	2.54271	1.54306	1.50982	3.60849	1.6222	1.669
250	1.1257	1.06153	1.34208	1.30013	1.2112	1.25206	1.26006	1.49455	1.01643	3.46473	1.08221	1.27521	2.67093	1.95792	1.27314	1.16286	5.17635	3.37634	1.31577	1.25504	1.35235	3.97808		225.284	0.952969	1.67622	1.12796	0.998716	1.2081	1.09318	1.31396	1.04482	1.24562	2.53195	1.61444	1.49127	3.56203	1.6226	1.63571
250.625	1.13337	1.08515	1.36239	1.33009	1.20552	1.26126	1.25418	1.51471	1.02083	3.32016	1.0958	1.33782	2.70102	1.90586	1.30019	1.15845	5.45219	3.60621	1.3195	1.28359	1.33335	4.07689		225.847	0.936176	1.66054	1.14831	0.983061	1.20655	1.07922	1.28971	1.04179	1.24917	2.52962	1.56319	1.46881	3.52533	1.62035	1.59443
251.25	1.12841	1.07728	1.36292	1.33564	1.17405	1.26242	1.25589	1.48292	1.02402	3.17173	1.1072	1.45467	2.60543	1.82349	1.317	1.16319	6.16841	3.83657	1.33384	1.30264	1.30767	3.96666		226.41	0.926553	1.65527	1.17906	0.988478	1.21981	1.08141	1.28999	1.0365	1.2473	2.51235	1.49958	1.48206	3.56714	1.61158	1.56894
251.875	1.13111	1.06358	1.34768	1.3018	1.17291	1.28181	1.26278	1.41508	1.03243	3.24042	1.11563	1.71	2.49873	1.90681	1.31017	1.16853	6.53938	3.78984	1.34731	1.30728	1.2888	4.02905		226.974	0.959194	1.64979	1.17771	1.0059	1.20152	1.07986	1.30275	1.01668	1.2077	2.49058	1.45225	1.47796	3.59901	1.60255	1.60843
252.5	1.12709	1.06318	1.34332	1.30992	1.22747	1.27925	1.27239	1.40123	1.03577	3.31608	1.12118	1.69005	2.47625	2.15684	1.28592	1.1878	6.13733	3.80433	1.35721	1.25792	1.29442	4.04443		227.537	1.01733	1.5946	1.17486	1.01912	1.17606	1.08274	1.3017	1.00678	1.18839	2.44595	1.42545	1.48748	3.59729	1.63321	1.58684
253.125	1.13823	1.05779	1.33573	1.28544	1.23359	1.27059	1.3034	1.4117	1.0338	3.26133	1.12417	1.61542	2.65648	2.48625	1.25836	1.21903	6.07592	4.01948	1.35494	1.22866	1.2747	3.91814		228.1	1.02427	1.59574	1.18029	1.01981	1.18029	1.09391	1.30851	1.00525	1.17784	2.44078	1.38602	1.47839	3.50734	1.64327	1.61008
253.75	1.14275	1.05575	1.33581	1.29476	1.20486	1.26089	1.34882	1.44352	1.02588	3.21265	1.12396	1.55702	2.82794	2.7628	1.23462	1.22596	6.67261	4.17369	1.36223	1.21816	1.24451	3.88134		228.663	1.01981	1.55172	1.20501	1.0325	1.17324	1.11008	1.31463	1.00541	1.16981	2.40252	1.3731	1.50659	3.47887	1.67732	1.61026
254.375	1.18013	1.06142	1.35437	1.29802	1.19464	1.26611	1.37722	1.49669	1.01945	3.11717	1.12546	1.54394	2.90129	2.57505	1.19572	1.23431	6.74323	4.17622	1.39345	1.23946	1.2214	3.88729		229.226	1.00191	1.59207	1.2066	1.02859	1.15389	1.10357	1.34621	0.995328	1.16569	2.37309	1.40788	1.50876	3.51547	1.68604	1.61266
255	1.19912	1.06296	1.41503	1.32958	1.22426	1.27041	1.4013	1.50043	1.02667	3.07937	1.13194	1.53237	2.91843	2.5833	1.19877	1.25471	6.2872	4.09317	1.43426	1.25129	1.19323	4.05521		229.79	0.965569	1.61577	1.19455	1.01198	1.15685	1.07978	1.37596	0.988608	1.1785	2.38578	1.40647	1.49214	3.51278	1.70104	1.58166
255.625	1.18434	1.06921	1.55411	1.30932	1.21052	1.28088	1.36643	1.45692	1.02475	3.0903	1.13128	1.53144	2.94363	2.50706	1.2621	1.24499	5.68678	3.99085	1.46306	1.24304	1.20256	3.90335		230.353	0.943367	1.62437	1.20749	1.03853	1.16562	1.07689	1.30071	0.988421	1.14846	2.46288	1.43246	1.49295	3.48639	1.68292	1.59536
256.25	1.15221	1.0721	1.67862	1.30102	1.21285	1.31218	1.29224	1.44365	1.00941	3.10769	1.13077	1.52274	3.0182	2.39186	1.33503	1.25191	5.40891	4.00306	1.46287	1.23287	1.24617	3.80091		230.916	0.9499	1.61601	1.20986	1.05089	1.1974	1.06714	1.30706	0.986585	1.15056	2.54123	1.44168	1.49905	3.42068	1.59655	1.63013
256.875	1.14041	1.06596	1.64753	1.28954	1.23859	1.33206	1.25232	1.43442	1.00653	3.09708	1.15495	1.56318	3.10345	2.33155	1.36695	1.271	5.59497	4.24402	1.44978	1.24924	1.27797	3.91019		231.479	0.957936	1.57448	1.22321	1.03478	1.20655	1.06395	1.29909	0.976386	1.15146	2.59939	1.4721	1.4959	3.36077	1.58339	1.61866
257.5	1.13755	1.06284	1.5923	1.27602	1.22732	1.32446	1.24771	1.40218	1.01688	3.06329	1.19599	1.63646	3.12899	2.29284	1.39842	1.23563	5.55218	4.58377	1.46867	1.25846	1.31531	4.17081		232.043	0.977223	1.57543	1.21081	1.0286	1.16495	1.08663	1.27975	0.975681	1.12992	2.6653	1.50462	1.49153	3.31013	1.5977	1.63608
258.125	1.13553	1.07428	1.56661	1.28329	1.18023	1.32971	1.24327	1.36397	1.02234	3.08507	1.17612	1.67127	3.09552	2.26641	1.48635	1.21835	5.45184	4.62501	1.49319	1.27354	1.30091	4.29039		232.606	0.954845	1.55572	1.22164	1.02029	1.17993	1.09224	1.28298	0.975749	1.14104	2.58081	1.5032	1.49461	3.20063	1.64344	1.65609
258.75	1.13844	1.06925	1.55312	1.28478	1.14387	1.32188	1.24928	1.35138	1.00855	3.23001	1.12773	1.58866	3.05881	2.47187	1.53027	1.21007	5.59602	4.35798	1.49549	1.28509	1.27253	4.20402		233.169	0.951238	1.60364	1.22066	1.02544	1.15665	1.08316	1.27621	0.983862	1.12792	2.46741	1.55945	1.49568	3.07404	1.62245	1.67667
259.375	1.14273	1.06913	1.52245	1.28469	1.14916	1.31758	1.23959	1.36557	1.00515	3.35792	1.11291	1.48647	3.04945	2.50013	1.47873	1.20627	5.7516	4.17343	1.47272	1.29586	1.2621	4.00684		233.732	0.954536	1.57959	1.25436	1.04101	1.16901	1.07686	1.30706	0.99451	1.13212	2.40246	1.5366	1.50373	3.01553	1.62448	1.70078
260	1.14353	1.06742	1.51309	1.31277	1.13736	1.34605	1.25348	1.37804	1.01279	3.35563	1.10624	1.43682	2.98607	2.52008	1.41245	1.19351	5.66679	4.19933	1.4494	1.25498	1.24829	3.80039		234.295	0.961922	1.56426	1.24197	1.05965	1.21384	1.07575	1.29789	0.996759	1.12192	2.32481	1.50363	1.50462	3.03148	1.58925	1.78471
260.625	1.13858	1.06752	1.50735	1.39398	1.14135	1.34776	1.27687	1.38009	1.03182	3.28297	1.10253	1.4611	2.8837	2.61806	1.35339	1.14826	5.7497	4.42836	1.43704	1.24621	1.2093	3.77435		234.859	0.984722	1.57586	1.25603	1.04389	1.19501	1.09243	1.29668	1.01497	1.11285	2.27138	1.45402	1.47915	3.07852	1.59933	1.81246
261.25	1.15392	1.06771	1.51201	1.35409	1.14959	1.33048	1.29007	1.39617	1.05953	3.1163	1.10633	1.53513	2.80272	2.69389	1.33419	1.10543	5.9132	4.64483	1.44387	1.28295	1.20985	3.78165		235.422	0.963673	1.54947	1.25038	1.05952	1.21619	1.08913	1.28627	1.02769	1.1052	2.26462	1.46924	1.46242	3.16378	1.57531	1.86465
261.875	1.18171	1.06495	1.52513	1.31608	1.16171	1.33428	1.2666	1.40811	1.07161	2.99945	1.11561	1.54563	2.8444	2.59825	1.34245	1.10224	5.83813	4.51228	1.468	1.29144	1.18147	3.81752		235.985	0.958316	1.53301	1.2776	1.06742	1.19686	1.10043	1.27657	1.02442	1.11207	2.31136	1.51507	1.43727	3.16647	1.56381	1.95345
262.5	1.20623	1.05897	1.52058	1.29909	1.11973	1.32232	1.25794	1.47341	1.0536	2.94174	1.11316	1.52434	2.8623	2.55298	1.36183	1.12421	5.17826	4.33604	1.48048	1.30951	1.16464	3.78992		236.548	0.965076	1.59212	1.31339	1.03219	1.21764	1.08578	1.2567	1.01874	1.11429	2.2978	1.50311	1.42738	3.08667	1.583	1.97515
263.125	1.19446	1.05824	1.51285	1.2902	1.12229	1.3287	1.25979	1.54085	1.03639	2.98696	1.10204	1.58637	2.8738	2.53615	1.40626	1.13149	4.8405	4.29846	1.43894	1.34241	1.18498	3.90126		237.111	0.959491	1.55723	1.29501	1.06769	1.22073	1.07872	1.26316	1.01315	1.1096	2.23574	1.52244	1.44955	3.0454	1.63006	2.00856
263.75	1.19466	1.06886	1.54334	1.31833	1.14733	1.3558	1.25603	1.56157	1.02983	2.97824	1.09693	1.62039	2.97304	2.51881	1.38876	1.13715	4.95297	4.23378	1.36005	1.31187	1.20487	4.08241		237.675	0.988032	1.56136	1.26292	1.05675	1.21366	1.07305	1.28589	1.01143	1.10703	2.22086	1.54332	1.46317	3.04215	1.63633	2.02398
264.375	1.19602	1.07114	1.5707	1.33681	1.14331	1.36362	1.25552	1.56993	1.03253	3.1713	1.10181	1.5862	3.12252	2.59877	1.3606	1.16086	5.87813	4.17593	1.31159	1.26901	1.23836	4.18389		238.238	0.981303	1.57517	1.25426	1.06598	1.20934	1.0716	1.26371	1.01022	1.12038	2.20722	1.6305	1.46412	3.09227	1.61756	2.04892
265	1.18942	1.0652	1.5532	1.32227	1.12872	1.35793	1.24624	1.5393	1.04415	3.63127	1.11109	1.63211	3.06401	2.73188	1.33293	1.18866	7.42508	4.22535	1.2853	1.23713	1.25745	4.17824		238.801	0.988916	1.57444	1.22354	1.08881	1.22767	1.06007	1.27703	1.00991	1.11908	2.16831	1.61829	1.46609	3.17894	1.6349	2.09783
265.625	1.17954	1.06059	1.51189	1.30854	1.11301	1.34763	1.2344	1.44527	1.06321	3.96829	1.13086	1.66673	2.93745	2.78998	1.38195	1.2189	7.67154	4.44851	1.26831	1.24073	1.25899	3.89672		239.364	0.994996	1.54265	1.20559	1.08541	1.21323	1.04635	1.31858	1.02328	1.09778	2.16672	1.61002	1.47791	3.37175	1.6778	2.14452
266.25	1.2014	1.06181	1.49608	1.32953	1.09986	1.32329	1.21572	1.39011	1.07119	3.99788	1.16551	1.68294	2.87461	2.72518	1.40345	1.24371	9.33403	4.77152	1.27005	1.24818	1.24733	3.65416		239.927	0.996314	1.5704	1.24676	1.07664	1.2152	1.03436	1.32691	1.02681	1.09311	2.26402	1.60766	1.47873	3.61298	1.63135	2.21982
266.875	1.2291	1.068	1.50152	1.32303	1.11779	1.32279	1.20317	1.35242	1.05444	3.83935	1.18447	1.67486	2.91263	2.66055	1.37008	1.2599	10.9372	5.02651	1.28359	1.23502	1.27139	3.52141		240.491	1.02371	1.66807	1.25473	1.09746	1.21301	1.04508	1.30147	1.02674	1.12332	2.36746	1.53855	1.49352	3.84927	1.66589	2.24619
267.5	1.25196	1.07395	1.51496	1.30732	1.10905	1.34079	1.19496	1.33068	1.04363	3.65542	1.19194	1.67952	3.06445	2.77527	1.30945	1.25166	10.0098	5.19944	1.28734	1.22955	1.28695	3.52968		241.054	1.04498	1.64983	1.24116	1.09437	1.22514	1.07082	1.26579	1.03246	1.11259	2.47806	1.50027	1.47317	4.18663	1.70811	2.20261
268.125	1.24422	1.08683	1.53562	1.32	1.0992	1.343	1.17738	1.31454	1.04606	3.3993	1.19682	1.68645	3.24673	3.11928	1.2677	1.25098	8.42007	5.26075	1.28077	1.28486	1.29174	3.56261		241.617	1.02483	1.63454	1.22891	1.11582	1.23359	1.08687	1.23902	1.02271	1.11036	2.5865	1.50732	1.44234	4.54849	1.77394	2.05595
268.75	1.23794	1.09131	1.54624	1.28997	1.12876	1.34358	1.17555	1.3125	1.04729	3.18727	1.20996	1.6245	3.29901	3.46955	1.25266	1.27637	6.76463	5.09197	1.3011	1.33254	1.30329	3.51744		242.18	1.00433	1.58736	1.23559	1.15983	1.23427	1.09599	1.23303	1.01279	1.1049	2.51529	1.52448	1.43346	4.76295	1.68413	2.00799
269.375	1.19826	1.08862	1.55321	1.29424	1.15019	1.33304	1.16864	1.31644	1.0415	3.15261	1.23691	1.58533	3.19067	3.55044	1.24786	1.28085	5.76234	4.79299	1.35459	1.35588	1.30812	3.35924		242.743	1.01299	1.57534	1.2663	1.17181	1.23153	1.09197	1.23397	0.999051	1.1154	2.48584	1.5706	1.44701	4.7507	1.6487	2.01124
270	1.2035	1.08742	1.54704	1.30823	1.16612	1.31849	1.16835	1.31046	1.03634	3.2438	1.25068	1.60093	2.97922	3.26037	1.26061	1.27196	5.7981	4.56489	1.43664	1.40999	1.29889	3.30589		243.307	1.02665	1.55152	1.3089	1.15933	1.22541	1.10096	1.22674	0.998938	1.13066	2.56682	1.65512	1.44613	4.88275	1.6626	2.02853
270.625	1.1878	1.08373	1.54993	1.34046	1.16677	1.3184	1.17921	1.31849	1.03971	3.2987	1.24677	1.57998	2.81945	2.79784	1.29166	1.25507	7.46356	4.5441	1.49183	1.45698	1.30326	3.4146		243.87	1.04659	1.55393	1.29416	1.12583	1.21387	1.11126	1.26375	0.996852	1.12745	2.61067	1.77306	1.44575	5.19392	1.6048	1.93909
271.25	1.18685	1.08331	1.58902	1.35344	1.20878	1.32963	1.1738	1.31068	1.04496	3.41818	1.23699	1.52476	2.70736	2.49025	1.31198	1.2349	10.1441	4.61201	1.45551	1.45674	1.31034	3.45622		244.433	1.02184	1.56056	1.30664	1.14532	1.19494	1.118	1.24772	0.997352	1.13793	2.61549	1.82415	1.46828	5.5614	1.57171	1.86864
271.875	1.18483	1.08744	1.58503	1.36709	1.21366	1.33261	1.16208	1.29641	1.05387	3.6409	1.22477	1.54224	2.60493	2.4557	1.32124	1.22254	11.0068	4.69807	1.37064	1.45344	1.30771	3.47214		244.996	1.02844	1.58106	1.30309	1.14884	1.20232	1.12027	1.2604	0.99694	1.15274	2.6382	1.85409	1.46865	5.99236	1.59121	1.81935
272.5	1.1763	1.10303	1.56153	1.35273	1.20351	1.35804	1.14763	1.30749	1.06176	3.88353	1.21694	1.60732	2.64283	2.58471	1.32965	1.24126	10.5313	4.86931	1.34595	1.4614	1.30944	3.46583		245.56	1.02835	1.60729	1.28614	1.16108	1.24084	1.11642	1.26745	1.00403	1.14548	2.66316	1.81022	1.45279	6.27938	1.65839	1.82048
273.125	1.17734	1.10812	1.53534	1.35083	1.20986	1.36269	1.14234	1.30819	1.06335	4.02872	1.2238	1.67547	2.802	2.72284	1.35585	1.29578	10.5144	5.23123	1.35472	1.4685	1.30928	3.34019		246.123	1.0216	1.61607	1.29649	1.17369	1.24589	1.11	1.27089	1.00273	1.15002	2.55152	1.71301	1.43839	6.40281	1.68254	1.81522
273.75	1.18972	1.11124	1.52558	1.36044	1.24508	1.35636	1.14533	1.31776	1.0713	4.03596	1.24479	1.74467	2.95194	2.66888	1.39003	1.32431	10.1321	5.95124	1.36233	1.43944	1.32138	3.28348		246.686	1.01533	1.6208	1.34655	1.18849	1.24288	1.11289	1.2775	0.995966	1.12184	2.41928	1.7199	1.45131	6.50347	1.69612	1.83112
274.375	1.19014	1.10894	1.5117	1.39183	1.26847	1.37565	1.15065	1.336	1.08538	3.9446	1.24683	1.86526	3.04037	2.59681	1.41008	1.3455	9.48633	6.94665	1.38854	1.46853	1.34715	3.37589		247.249	1.0111	1.60644	1.33985	1.18326	1.23337	1.09779	1.28557	1.0135	1.12831	2.29771	1.76009	1.47096	6.31247	1.76152	1.92727
275	1.19009	1.10009	1.47952	1.38229	1.22548	1.37097	1.16049	1.34363	1.09838	4.06248	1.2565	2.12987	3.23942	2.63901	1.42624	1.39775	8.7467	7.84195	1.40796	1.48432	1.36315	3.36437		247.812	1.04423	1.62117	1.33857	1.17886	1.20943	1.09113	1.24937	1.01193	1.15607	2.23157	1.81737	1.46053	5.88207	1.79951	2.0474
275.625	1.18019	1.10077	1.44107	1.3722	1.21347	1.36132	1.17609	1.37097	1.09523	4.37749	1.27374	2.04008	3.55641	2.72379	1.39858	1.48692	8.36561	8.3369	1.41253	1.49439	1.35414	3.39051		248.376	1.10336	1.57706	1.35537	1.1754	1.16946	1.10241	1.25033	1.00366	1.14252	2.21772	1.85762	1.43619	5.59291	1.81817	2.06714
276.25	1.17695	1.09016	1.41057	1.35228	1.21995	1.36451	1.18838	1.39818	1.07897	4.72295	1.30326	1.7674	3.64411	3.10431	1.36381	1.56033	7.73807	8.26741	1.39887	1.43438	1.36535	3.37106		248.939	1.09495	1.61364	1.35783	1.16885	1.16152	1.11849	1.26821	1.00462	1.14102	2.2316	1.84961	1.45088	5.62444	1.78874	1.98341
276.875	1.18121	1.08156	1.3921	1.33429	1.22223	1.38052	1.19615	1.38207	1.07226	4.80029	1.31229	1.66401	3.62617	3.06962	1.3541	1.5538	6.3073	7.82632	1.37859	1.3468	1.36268	3.39326		249.502	1.09224	1.61941	1.34421	1.17994	1.19156	1.10957	1.27283	1.00001	1.11398	2.29803	1.86347	1.4691	5.689	1.85758	1.96135
277.5	1.18767	1.08032	1.39666	1.33231	1.21904	1.38162	1.20366	1.3907	1.07479	4.48097	1.29576	1.6277	3.6381	2.97599	1.38429	1.518	6.15952	7.65759	1.41173	1.31815	1.33667	3.54695		250.065	1.06883	1.5902	1.33002	1.18634	1.18913	1.08108	1.29093	0.994467	1.12404	2.27594	1.82817	1.49185	5.54894	1.87442	1.98975
278.125	1.19612	1.07948	1.42049	1.31258	1.23334	1.39236	1.2022	1.41385	1.0718	4.14898	1.27921	1.69129	3.63119	3.11414	1.42967	1.4666	6.4988	8.09797	1.50902	1.28475	1.2871	3.64358		250.628	1.06501	1.57787	1.32114	1.19935	1.18553	1.08702	1.26087	0.997621	1.13014	2.23901	1.78895	1.50571	5.29476	1.8953	1.93068
278.75	1.19936	1.08186	1.42615	1.33602	1.21537	1.37219	1.19932	1.42639	1.05982	4.12896	1.26172	1.82031	3.56256	3.37964	1.47258	1.4163	6.80201	8.6712	1.53678	1.30539	1.27643	3.73091		251.192	1.07315	1.58161	1.33679	1.22589	1.19563	1.08228	1.28254	0.992855	1.13331	2.20142	1.74094	1.52651	5.16778	1.84984	1.84106
279.375	1.18925	1.08593	1.43148	1.36278	1.23203	1.35916	1.20824	1.46885	1.04455	4.47833	1.20878	2.09212	3.46849	3.59325	1.5225	1.39994	6.88755	8.92935	1.51405	1.28603	1.29425	3.8913		251.755	1.07671	1.59186	1.30535	1.22416	1.1847	1.09665	1.27845	0.995647	1.11896	2.18853	1.68954	1.53499	5.18346	1.89203	1.85228
280	1.20379	1.08064	1.44469	1.34657	1.21721	1.35357	1.21412	1.51965	1.04391	4.71672	1.19149	2.14928	3.43066	3.44755	1.55695	1.47187	6.23554	8.94524	1.51936	1.27944	1.32091	4.07618		252.318	1.06478	1.58641	1.31825	1.21134	1.15984	1.0886	1.26835	0.986017	1.12132	2.22578	1.58121	1.55799	5.1555	1.90597	1.8835
280.625	1.21644	1.07501	1.45701	1.35012	1.16901	1.37389	1.19966	1.51775	1.04833	4.67365	1.20662	1.82771	3.50591	3.33801	1.57137	1.61258	5.98512	8.87112	1.53985	1.25855	1.35959	4.14484		252.881	1.06271	1.62336	1.32468	1.2367	1.17233	1.08305	1.30571	0.991169	1.12946	2.21727	1.5114	1.57034	5.27232	1.88379	1.98809
281.25	1.23304	1.08231	1.43649	1.34217	1.1747	1.34408	1.1847	1.49012	1.05008	4.42803	1.22906	1.74019	3.54467	3.68768	1.50571	1.75407	6.23051	8.61562	1.53554	1.25918	1.40282	4.25436		253.444	1.0765	1.66467	1.31852	1.27112	1.15197	1.07536	1.29228	0.991194	1.09408	2.30098	1.49895	1.57756	5.41179	1.804	2.08089
281.875	1.24906	1.08484	1.4429	1.32761	1.19885	1.32885	1.18073	1.48228	1.05198	4.2752	1.23417	1.81506	3.50125	4.19274	1.42229	1.79312	6.20352	8.29208	1.51641	1.25794	1.44546	4.31858		254.008	1.0664	1.68646	1.28323	1.25669	1.16851	1.07018	1.26032	0.986448	1.1161	2.31243	1.53203	1.58379	5.48372	1.7237	2.17128
282.5	1.25574	1.07995	1.44129	1.34993	1.193	1.32206	1.17532	1.49492	1.04523	4.21408	1.21857	1.91774	3.6262	4.40925	1.36621	1.76968	6.51859	8.08779	1.5094	1.25968	1.4556	4.43377		254.571	1.07116	1.6362	1.25187	1.20863	1.15709	1.06922	1.25664	0.992605	1.10355	2.35693	1.50105	1.58615	5.66681	1.70551	2.20577
283.125	1.27309	1.07988	1.45921	1.35997	1.20739	1.34371	1.1886	1.50903	1.04285	4.05632	1.19537	2.1096	3.93614	3.68806	1.35697	1.69584	7.39604	7.77934	1.50943	1.28109	1.46056	4.42987		255.134	1.0611	1.6489	1.23959	1.23027	1.14441	1.0743	1.30224	0.987722	1.11373	2.43684	1.51054	1.62191	6.1395	1.70755	2.20824
283.75	1.27663	1.08013	1.46571	1.34754	1.20668	1.35841	1.19463	1.4842	1.04336	3.84736	1.17853	2.36805	4.3732	3.47618	1.36746	1.64807	8.33303	7.37557	1.50122	1.29504	1.47814	4.82352		255.697	1.07501	1.61775	1.24958	1.19409	1.13663	1.08413	1.29303	0.98942	1.14507	2.49415	1.50103	1.6356	6.57553	1.73786	2.19719
284.375	1.26183	1.07014	1.44416	1.34256	1.20306	1.36676	1.19343	1.47777	1.03901	3.74685	1.18399	2.295	4.85522	3.04275	1.37439	1.58432	9.21775	7.1852	1.48045	1.30333	1.49343	5.9546		256.261	1.09629	1.64141	1.28642	1.16251	1.15667	1.1043	1.2874	0.989489	1.11766	2.54177	1.48103	1.62335	6.61383	1.75856	2.1499
285	1.25249	1.07413	1.46177	1.36475	1.19048	1.36073	1.18141	1.49323	1.03875	3.78188	1.19104	1.99432	5.91363	2.6333	1.38985	1.56053	9.59053	7.40402	1.4812	1.28051	1.46326	6.76831		256.824	1.09651	1.66946	1.28622	1.1621	1.171	1.10494	1.2784	0.989989	1.12219	2.50129	1.50977	1.58355	6.36004	1.83776	2.22337
285.625	1.24498	1.06783	1.47527	1.37879	1.19601	1.34868	1.168	1.46623	1.03561	3.93268	1.18497	1.87192	6.45233	2.54376	1.39616	1.61923	8.5518	7.95987	1.50053	1.25286	1.40122	6.57662		257.387	1.08504	1.62909	1.28898	1.15603	1.15611	1.09822	1.25185	0.986972	1.09556	2.47184	1.57965	1.52536	6.25881	1.9207	2.33864
286.25	1.23259	1.06604	1.46551	1.32722	1.21425	1.32964	1.15893	1.4783	1.03601	4.08432	1.18109	1.85497	5.64122	2.6929	1.35798	1.61131	7.55446	8.39936	1.50627	1.27754	1.34516	6.07572		257.95	1.08555	1.66212	1.29852	1.17634	1.16215	1.08573	1.29688	0.991288	1.07676	2.37907	1.60155	1.49698	5.96549	1.91118	2.38931
286.875	1.25786	1.07862	1.43585	1.33368	1.17776	1.31856	1.15871	1.47938	1.04308	4.09598	1.19852	1.91299	5.05171	2.81614	1.29184	1.5803	7.37008	8.45847	1.48936	1.30648	1.29959	5.59214		258.513	1.08747	1.60958	1.29386	1.17936	1.16851	1.08091	1.28715	0.987672	1.08207	2.28769	1.62453	1.48762	5.48635	1.88097	2.40078
287.5	1.29965	1.09173	1.44071	1.35669	1.20262	1.30942	1.1626	1.45416	1.05028	3.99661	1.20309	1.98606	4.81814	2.80533	1.28631	1.537	7.62733	8.29356	1.50773	1.32404	1.27811	5.0437		259.077	1.10026	1.62709	1.32356	1.16222	1.17989	1.08318	1.27809	0.986629	1.08036	2.22087	1.62464	1.49073	5.2057	1.81051	2.19474
288.125	1.30509	1.08585	1.45897	1.38443	1.18935	1.32194	1.1754	1.441	1.05511	4.07636	1.18081	2.01977	4.55704	2.71826	1.31051	1.50329	7.96133	7.90637	1.55699	1.38085	1.31149	4.88864		259.64	1.1306	1.685	1.32809	1.17867	1.20187	1.0874	1.27777	0.97841	1.07463	2.23972	1.66373	1.50848	5.12396	1.76045	1.97125
288.75	1.27952	1.07668	1.48472	1.37164	1.18524	1.32532	1.17721	1.47193	1.04693	4.44024	1.14621	2.07324	4.35819	2.60869	1.29828	1.5226	7.49092	7.65106	1.54195	1.48891	1.30853	5.27687		260.203	1.11745	1.68201	1.32998	1.18957	1.2223	1.09224	1.29937	0.983063	1.07874	2.20831	1.72591	1.54155	5.3418	1.82929	1.88827
289.375	1.26281	1.0661	1.5202	1.38448	1.1747	1.32752	1.16898	1.56703	1.04601	4.78852	1.13907	2.11209	4.19413	2.65101	1.29729	1.59842	6.48214	7.50231	1.46718	1.65484	1.33386	5.35578		260.766	1.10274	1.71353	1.33779	1.17479	1.21621	1.07924	1.32302	0.968804	1.05935	2.21352	1.77158	1.55201	5.7355	1.81853	1.86981
290	1.24958	1.06224	1.54031	1.38797	1.19211	1.33343	1.17137	1.73444	1.05904	4.70925	1.13972	2.03696	4.08108	2.82956	1.31797	1.70523	6.26133	7.27811	1.41475	1.52869	1.37525	4.49237		261.329	1.11346	1.74291	1.35659	1.15739	1.21435	1.07078	1.29464	0.974681	1.09001	2.273	1.8014	1.57313	6.08451	1.79385	1.91714
290.625	1.23491	1.07315	1.55682	1.34328	1.19413	1.34206	1.17029	1.7718	1.06112	4.4178	1.13108	2.01182	4.13368	2.92306	1.32817	1.81412	6.72623	7.14436	1.39049	1.38946	1.39811	4.03342		261.893	1.08717	1.73094	1.36041	1.17709	1.20382	1.06661	1.29604	0.979659	1.09922	2.39296	1.81089	1.57072	6.46716	1.75906	1.90072
291.25	1.23381	1.07661	1.61315	1.34426	1.19927	1.33149	1.16874	1.64567	1.05398	4.21895	1.13014	2.03344	4.17352	3.00893	1.34259	1.839	7.09384	7.30376	1.35319	1.41704	1.36296	4.10685		262.456	1.07731	1.7156	1.34338	1.17665	1.21666	1.08817	1.30059	0.987609	1.09576	2.43924	1.77433	1.58661	6.63808	1.7354	1.9509
291.875	1.22733	1.07819	1.72876	1.35492	1.21515	1.34106	1.17586	1.56412	1.0405	4.10375	1.15193	1.92925	4.2307	2.79483	1.3483	1.66167	6.77048	7.68208	1.30305	1.49804	1.34221	4.13876		263.019	1.08586	1.70986	1.3263	1.1522	1.21098	1.07736	1.28938	0.990901	1.10055	2.44598	1.69111	1.57571	6.38476	1.69085	2.02775
292.5	1.22219	1.07794	1.72963	1.35356	1.24528	1.32815	1.17611	1.54076	1.03295	4.20634	1.17069	1.8265	4.43384	2.53347	1.35141	1.4462	6.82626	7.86559	1.28507	1.55065	1.36448	4.15814		263.582	1.1053	1.6841	1.35017	1.17459	1.19653	1.08035	1.3058	0.998233	1.11462	2.51876	1.60164	1.58732	5.82155	1.75138	2.0487
293.125	1.21835	1.08506	1.71204	1.36181	1.25879	1.32346	1.18343	1.53329	1.03597	4.36676	1.17997	1.84218	4.71865	2.47584	1.36412	1.32807	6.99488	7.75409	1.3103	1.53747	1.4172	4.23799		264.145	1.11622	1.6995	1.32799	1.15511	1.21212	1.08607	1.28824	0.998233	1.08365	2.59854	1.55114	1.61531	5.30657	1.77666	2.01827
293.75	1.22395	1.08359	1.76984	1.3491	1.23381	1.36116	1.18029	1.51479	1.03905	4.41159	1.1718	1.82294	4.77259	2.66597	1.37162	1.28474	7.47525	7.39823	1.37235	1.47406	1.44488	4.26948		264.709	1.10272	1.67684	1.35092	1.14807	1.23782	1.08805	1.28766	1.01011	1.06013	2.62549	1.60125	1.6132	4.94267	1.73661	2.02805
294.375	1.22357	1.09546	1.74738	1.3727	1.19788	1.36435	1.19333	1.51378	1.04542	4.35487	1.16277	1.70638	4.73605	2.77224	1.33207	1.25042	7.65605	6.90398	1.44053	1.43219	1.41782	4.54042		265.272	1.07727	1.65875	1.36207	1.15814	1.23419	1.09717	1.28433	1.00491	1.07724	2.75934	1.64108	1.58879	4.63914	1.74658	2.06245
295	1.26877	1.09304	1.61197	1.39855	1.18043	1.32867	1.20674	1.51418	1.04392	4.43912	1.15456	1.65065	4.86701	2.69378	1.32478	1.21342	7.21524	6.61107	1.47466	1.40438	1.4133	4.55148		265.835	1.05063	1.69195	1.36254	1.18849	1.23427	1.10179	1.28026	1.00062	1.09796	2.80121	1.69917	1.57841	4.42894	1.77754	2.06417
295.625	1.29479	1.08176	1.52999	1.40057	1.18389	1.32193	1.20528	1.51612	1.04657	4.45768	1.15086	1.66308	4.976	2.55725	1.37153	1.1738	6.99888	6.8088	1.50097	1.36217	1.42933	4.37921		266.398	1.0661	1.70372	1.35494	1.15664	1.20704	1.10736	1.30071	1.00977	1.11205	2.62389	1.81983	1.5629	4.2857	1.77727	2.10194
296.25	1.33494	1.07609	1.53189	1.35376	1.20261	1.32077	1.17816	1.49486	1.04685	4.20424	1.16011	1.63934	5.03743	2.42386	1.40024	1.15416	7.61826	7.32609	1.53953	1.32765	1.48747	3.77724		266.962	1.07732	1.71823	1.35506	1.13946	1.2186	1.10443	1.31417	1.02265	1.10469	2.40864	1.80312	1.50977	4.22925	1.75014	2.17248
296.875	1.29671	1.07431	1.56864	1.35988	1.19802	1.29469	1.14338	1.4805	1.04287	3.92864	1.22311	1.63388	5.09271	2.29462	1.4249	1.15827	8.60767	7.87963	1.57934	1.34723	1.45611	3.44753		267.525	1.09773	1.69358	1.34882	1.16629	1.20633	1.10363	1.32785	1.03033	1.07555	2.25009	1.73439	1.48691	4.28881	1.77639	2.22692
297.5	1.27233	1.08892	1.58839	1.34487	1.20355	1.30501	1.12794	1.50623	1.03252	3.93595	1.26504	1.639	5.44915	2.32146	1.43366	1.19443	8.83736	8.44985	1.62701	1.38851	1.4178	3.39187		268.088	1.076	1.70426	1.36589	1.1553	1.21686	1.11809	1.31547	1.03755	1.0977	2.21708	1.69108	1.50748	4.486	1.76305	2.17464
298.125	1.26531	1.09787	1.55477	1.30412	1.1726	1.30555	1.12771	1.49605	1.03936	4.20453	1.25546	1.73891	6.03417	2.4051	1.48666	1.21738	8.88943	8.82895	1.72457	1.3907	1.44185	3.5597		268.651	1.07038	1.73681	1.3811	1.16466	1.21297	1.11021	1.30717	1.06623	1.09365	2.18739	1.6849	1.52379	4.82854	1.76534	2.07025
298.75	1.25423	1.09737	1.53332	1.3039	1.19114	1.28803	1.14554	1.45912	1.05376	4.31793	1.2659	1.8669	6.30897	2.4067	1.50649	1.22595	8.73873	8.78162	1.86526	1.34356	1.48922	3.6098		269.214	1.06001	1.73617	1.36964	1.15414	1.22241	1.11153	1.29361	1.07375	1.09402	2.16597	1.70443	1.51381	5.24767	1.75923	2.04628
299.375	1.26473	1.07773	1.55407	1.33646	1.21885	1.30517	1.14205	1.4468	1.05951	4.2661	1.25764	1.86837	6.2484	2.36858	1.47383	1.24622	7.85179	8.40464	2.00663	1.33793	1.47571	3.44118		269.778	1.0335	1.77343	1.35997	1.14013	1.22138	1.13477	1.28511	1.06421	1.08137	2.17333	1.72416	1.52774	5.46819	1.74632	2.02678
300	1.25367	1.07455	1.54225	1.36725	1.25407	1.35216	1.14501	1.47006	1.05458	3.92297	1.20508	1.7475	6.23673	2.47453	1.42691	1.25804	7.60313	7.91174	2.06025	1.33188	1.38593	3.23377		270.341	1.04447	1.7893	1.36131	1.14279	1.22147	1.12209	1.3251	1.05674	1.07533	2.23998	1.82705	1.52367	5.10085	1.74881	2.1463
300.625	1.25365	1.0811	1.53688	1.34678	1.23761	1.35437	1.15044	1.47034	1.05031	3.59917	1.17813	1.67874	5.97694	2.58124	1.36721	1.23818	7.65638	7.5873	2.02635	1.32676	1.35713	2.96224		270.904	1.05646	1.80471	1.36556	1.14663	1.22569	1.11798	1.28219	1.06217	1.08123	2.30803	1.92715	1.52568	4.65711	1.7572	2.25934
301.25	1.26376	1.11487	1.52604	1.38736	1.19729	1.36388	1.15521	1.47813	1.0465	3.49374	1.1836	1.72359	5.59134	2.76789	1.38754	1.21073	8.31812	7.31442	1.94965	1.34622	1.40636	2.78778		271.467	1.06448	1.7927	1.3486	1.11947	1.21216	1.12865	1.30048	1.07842	1.09955	2.31459	1.92371	1.50897	4.35718	1.75921	2.235
301.875	1.33815	1.16407	1.5295	1.37271	1.22548	1.38121	1.17637	1.48205	1.04432	3.46849	1.18572	1.7298	5.10407	3.05696	1.45467	1.19701	8.75059	7.0334	1.92867	1.38114	1.49666	2.71515		272.03	1.07494	1.75233	1.33533	1.14528	1.20716	1.11047	1.29945	1.09466	1.09953	2.31365	1.85583	1.50061	4.09394	1.72651	2.11341
302.5	1.38798	1.15573	1.52989	1.34467	1.23415	1.35675	1.1848	1.52371	1.05324	3.53005	1.18788	1.78938	4.71654	3.06109	1.47358	1.23342	8.622	6.8813	1.94638	1.39143	1.58335	2.68411		272.594	1.09578	1.79626	1.3386	1.12599	1.2269	1.10534	1.30512	1.09482	1.10358	2.29192	1.83403	1.50512	3.85239	1.68019	2.02531
303.125	1.37911	1.12803	1.51277	1.33908	1.21925	1.34733	1.19611	1.63819	1.05533	3.62484	1.19345	1.87104	4.55195	3.31324	1.42596	1.28841	8.2004	6.84582	1.84342	1.40915	1.56296	2.70105		273.157	1.12063	1.76533	1.35049	1.15093	1.21986	1.10488	1.33143	1.08524	1.10247	2.28394	1.90755	1.50588	3.7218	1.6364	1.92753
303.75	1.36454	1.12268	1.51519	1.363	1.20015	1.34056	1.23726	1.92968	1.05471	3.71422	1.2365	1.81294	4.35354	3.38786	1.3894	1.30095	7.65065	6.98427	1.66402	1.39937	1.54867	2.82004		273.72	1.13928	1.74414	1.34712	1.14061	1.19454	1.09915	1.32622	1.08085	1.08154	2.2805	1.96254	1.50264	3.72815	1.67142	1.85612
304.375	1.39752	1.15133	1.54302	1.37969	1.19702	1.32222	1.2611	2.24303	1.05276	3.84339	1.28747	1.79415	4.18836	3.76563	1.3676	1.25457	7.29232	7.16579	1.57046	1.41532	1.56289	2.93596		274.283	1.09692	1.76028	1.34466	1.12874	1.21462	1.11321	1.33322	1.07338	1.0692	2.35135	1.96268	1.50462	3.97085	1.7335	1.83821
305	1.47121	1.16704	1.59111	1.37479	1.19107	1.3461	1.26301	2.25267	1.0448	3.98053	1.29974	1.73418	4.03453	3.96275	1.3536	1.24815	7.01873	7.19458	1.59375	1.47019	1.56798	3.09806		274.846	1.08167	1.73861	1.38525	1.1651	1.2227	1.12769	1.32056	1.0767	1.10623	2.46666	1.93174	1.50069	4.27669	1.76511	1.8423
305.625	1.4662	1.12916	1.64064	1.37806	1.18544	1.34083	1.26424	1.98711	1.04118	4.07746	1.28363	1.74488	4.02683	3.77499	1.36325	1.30575	6.74255	6.85566	1.65613	1.48448	1.71452	2.93063		275.41	1.08233	1.72501	1.36828	1.13705	1.22147	1.12226	1.30176	1.0718	1.13419	2.4858	1.84771	1.52186	4.67369	1.77768	1.89141
306.25	1.39025	1.09342	1.64531	1.42468	1.2159	1.32129	1.23955	1.77914	1.04258	4.05902	1.24358	1.77305	4.18133	3.56903	1.38234	1.43342	6.78436	6.43668	1.73219	1.58265	1.86074	2.73495		275.973	1.09525	1.72229	1.39724	1.13652	1.23227	1.10708	1.33478	1.0789	1.11406	2.45437	1.82748	1.5274	5.06887	1.76516	1.90206
306.875	1.27606	1.08217	1.6131	1.40526	1.19632	1.30525	1.23065	1.75233	1.04659	3.96405	1.18976	1.77807	4.35496	3.33779	1.37509	1.44644	7.27579	6.24301	1.78595	1.60813	2.01657	2.81059		276.536	1.08281	1.7425	1.40032	1.15493	1.23399	1.10895	1.33242	1.08512	1.12632	2.42707	1.77258	1.57102	5.41458	1.81706	2.00456
307.5	1.20561	1.06932	1.604	1.4056	1.21115	1.30532	1.2331	1.86048	1.05129	3.85747	1.1803	1.78534	4.37296	3.37273	1.34476	1.36316	7.29948	6.27419	1.78137	1.52092	2.05049	2.9712		277.099	1.07822	1.74048	1.386	1.15764	1.23711	1.11018	1.33547	1.07524	1.10493	2.38658	1.75073	1.60068	5.76245	1.77351	2.12584
308.125	1.19207	1.06291	1.62479	1.37392	1.24529	1.29151	1.21526	2.06806	1.05081	3.88937	1.20115	1.85563	4.34696	3.7347	1.31017	1.35129	7.14868	6.4693	1.71266	1.44031	2.072	2.81298		277.663	1.10513	1.71894	1.40997	1.1573	1.23223	1.09785	1.32182	1.06328	1.11357	2.31914	1.7888	1.62106	5.83417	1.73684	2.19645
308.75	1.18652	1.06546	1.78887	1.37218	1.26914	1.29568	1.23449	2.26094	1.05115	4.03088	1.26113	1.84391	4.30963	4.02381	1.31099	1.3905	7.04099	6.80012	1.63789	1.42331	2.08802	2.775		278.226	1.14309	1.67415	1.41709	1.12716	1.21816	1.08804	1.32325	1.07688	1.10866	2.35984	1.79223	1.60351	5.52182	1.70494	2.21472
309.375	1.199	1.07109	2.03014	1.34516	1.28581	1.28981	1.24054	2.39751	1.05851	4.08576	1.32492	1.75794	4.31027	3.96726	1.32963	1.43397	7.64156	7.0666	1.65119	1.43331	1.87586	2.6627		278.789	1.19424	1.67442	1.38874	1.12129	1.21013	1.10008	1.29274	1.08397	1.08488	2.33926	1.83706	1.54624	5.1822	1.70579	2.24811
310	1.1993	1.07248	2.20743	1.36529	1.28862	1.28663	1.20218	2.48407	1.06349	3.99271	1.34031	1.66359	4.43409	3.74102	1.32641	1.48221	8.16359	7.25512	1.73359	1.43957	1.87789	2.68823		279.352	1.25365	1.70577	1.41198	1.14576	1.20042	1.12736	1.31684	1.08533	1.10068	2.4371	1.87065	1.50841	5.22455	1.76298	2.24478
310.625	1.18721	1.08631	2.15519	1.42457	1.29559	1.29352	1.19581	2.47237	1.05293	3.94177	1.28918	1.56486	4.36905	3.58619	1.35714	1.47015	8.52252	7.32004	1.80295	1.43766	2.20089	2.70605		279.915	1.25762	1.73263	1.41817	1.14044	1.18553	1.12365	1.30765	1.07134	1.11745	2.43725	1.86951	1.48578	5.53837	1.83169	2.29186
311.25	1.198	1.08684	1.9546	1.43146	1.30865	1.29843	1.18947	2.41476	1.03963	4.06953	1.28542	1.52088	4.21917	3.76058	1.4167	1.37225	8.30785	7.22721	1.81542	1.42789	2.6583	2.78296		280.479	1.28233	1.69809	1.41462	1.16625	1.19736	1.11803	1.30117	1.06278	1.1132	2.38875	1.8984	1.48575	5.29221	1.97958	2.20101
311.875	1.20149	1.0776	1.7944	1.38522	1.31432	1.29416	1.19439	2.27898	1.03775	4.33683	1.29838	1.55581	4.16375	3.91644	1.47138	1.31713	7.82029	6.98863	1.74144	1.40275	2.50426	2.92965		281.042	1.25647	1.70296	1.42361	1.14686	1.24382	1.1425	1.3108	1.07488	1.10298	2.37031	1.92529	1.47506	4.59564	2.09219	2.06878
312.5	1.18766	1.0673	1.67518	1.37372	1.28914	1.29627	1.19548	2.22447	1.03886	4.66044	1.29981	1.61972	4.34445	4.22684	1.46793	1.29754	7.26078	6.70038	1.72545	1.4071	2.20463	2.91871		281.605	1.24955	1.69579	1.42879	1.15916	1.23864	1.16105	1.32096	1.08848	1.1242	2.3058	1.91158	1.4958	4.04931	2.07013	2.02056
313.125	1.20495	1.06267	1.63078	1.39242	1.28326	1.29737	1.19647	2.26301	1.04263	4.87823	1.31505	1.62154	4.62545	4.37109	1.48291	1.28828	7.46092	6.54211	1.7364	1.42506	2.0792	2.88999		282.168	1.19683	1.68123	1.44989	1.14749	1.22268	1.19821	1.3223	1.07792	1.13016	2.30101	1.91711	1.48038	3.82227	2.01477	2.08472
313.75	1.20953	1.06759	1.66488	1.40764	1.26268	1.29922	1.18705	2.26936	1.03399	5.21049	1.31732	1.60894	4.76477	4.39029	1.5035	1.26521	7.47598	6.72917	1.70715	1.42461	2.07511	2.90458		282.731	1.15914	1.68913	1.44694	1.14422	1.20935	1.21572	1.34209	1.09264	1.11246	2.27553	1.92052	1.50392	3.85858	1.96278	2.08594
314.375	1.22482	1.07004	1.68548	1.39349	1.29015	1.31085	1.19828	2.17616	1.03199	5.60139	1.32068	1.66058	4.8807	4.39318	1.53736	1.26188	7.59605	7.01417	1.67236	1.47111	2.07339	2.99942		283.295	1.15192	1.73087	1.42496	1.14319	1.21619	1.23502	1.31877	1.10602	1.10522	2.27154	1.94702	1.52667	4.02805	1.91888	2.07394
315	1.25495	1.07846	1.68926	1.41878	1.27544	1.29028	1.21047	2.08588	1.03296	5.83157	1.34076	1.71503	5.06925	4.19256	1.52067	1.25495	7.82737	7.17519	1.63625	1.57534	1.95333	3.22715		283.858	1.14582	1.70253	1.44511	1.16368	1.20568	1.24757	1.29316	1.1228	1.13072	2.31595	1.9489	1.51833	4.37472	1.88289	2.02835
315.625	1.23879	1.09642	1.65297	1.38519	1.25689	1.29061	1.20092	2.09499	1.04234	5.77521	1.37422	1.77678	5.25976	4.22479	1.49101	1.25437	8.89593	7.17279	1.60676	1.63715	1.89752	3.79924		284.421	1.14486	1.7018	1.41703	1.11778	1.20977	1.24299	1.31133	1.12582	1.08116	2.32009	1.98267	1.54719	5.1321	1.88756	2.09002
316.25	1.22747	1.11046	1.61559	1.36639	1.26027	1.32039	1.21006	2.13946	1.05321	5.61225	1.43819	1.94407	5.66457	4.52045	1.50732	1.24002	9.42789	6.93553	1.60623	1.55107	1.92456	3.87171		284.984	1.16346	1.68444	1.41942	1.12387	1.19449	1.24954	1.32703	1.14436	1.10232	2.31242	2.02329	1.54839	5.83237	1.95466	2.18016
316.875	1.23486	1.10615	1.61809	1.36145	1.25323	1.31873	1.23245	2.09806	1.06528	5.49451	1.52806	2.05571	6.05684	4.90447	1.53596	1.20537	9.35688	6.62847	1.63747	1.4637	2.0509	3.66771		285.547	1.15496	1.66485	1.4248	1.13085	1.20233	1.23926	1.37369	1.14749	1.11507	2.34826	2.05608	1.55558	5.66162	1.90736	2.33584
317.5	1.2777	1.11674	1.6643	1.36573	1.27824	1.32585	1.26532	2.06678	1.06907	5.42893	1.60726	2.20424	6.23214	5.69475	1.52572	1.16888	8.91189	6.50684	1.64218	1.43059	2.11372	3.41155		286.111	1.12784	1.72468	1.40412	1.13233	1.19953	1.21223	1.32979	1.1369	1.09517	2.39046	2.01622	1.54902	5.08713	1.909	2.36601
318.125	1.26945	1.13414	1.69499	1.35385	1.28716	1.32872	1.26783	2.05193	1.08083	5.48729	1.5785	2.46838	6.32134	6.87383	1.48332	1.14779	8.74082	6.54641	1.62352	1.48174	1.99606	3.09482		286.674	1.08604	1.72756	1.39052	1.13116	1.19121	1.22339	1.30708	1.1323	1.12313	2.41404	1.96007	1.53974	4.99156	1.89731	2.28022
318.75	1.24626	1.14053	1.7226	1.36504	1.27013	1.34763	1.24894	2.0785	1.08427	5.74099	1.50626	2.67068	6.56462	5.73703	1.45414	1.17367	8.44876	6.61624	1.65906	1.52904	1.87813	2.87507		287.237	1.0948	1.68832	1.38295	1.14986	1.23241	1.2278	1.32239	1.12523	1.11152	2.43056	1.9276	1.53625	5.50446	1.90658	2.1513
319.375	1.21125	1.13372	1.73842	1.35599	1.25256	1.3177	1.25607	2.09142	1.0768	5.93314	1.40676	2.2264	6.90916	4.11969	1.44767	1.22547	7.99568	6.61123	1.75303	1.50945	1.92985	2.59943		287.8	1.08745	1.63753	1.4031	1.16735	1.21679	1.22945	1.32943	1.10931	1.12498	2.39441	1.92337	1.54607	6.4497	1.95483	2.18693
320	1.20014	1.11067	1.77687	1.3251	1.25334	1.30994	1.29809	2.08819	1.06958	5.97861	1.32287	1.83471	7.08318	3.93182	1.43144	1.2724	7.16818	6.67914	1.77395	1.48604	2.00836	2.47113		288.363	1.12743	1.67677	1.41232	1.16981	1.21536	1.21063	1.33212	1.13181	1.12989	2.43179	1.96903	1.58135	7.54712	1.9772	2.37976
320.625	1.2086	1.11784	1.85494	1.39789	1.22501	1.33811	1.34719	2.14003	1.08174	5.83613	1.26364	1.80146	6.82486	4.56081	1.43252	1.27222	6.93279	7.01904	1.78592	1.48774	2.11224	2.38415		288.927	1.16953	1.71067	1.40675	1.15334	1.21029	1.2072	1.29703	1.14068	1.13195	2.43028	2.00718	1.62136	8.31708	2.00206	2.25526
321.25	1.2053	1.1231	1.92359	1.42473	1.22377	1.34978	1.3747	2.23581	1.08198	5.65288	1.25019	1.79736	6.61578	5.83086	1.51015	1.26073	7.07776	7.43094	1.8268	1.50545	2.3491	2.34218		289.49	1.20237	1.71572	1.40677	1.13402	1.20192	1.20352	1.29224	1.13345	1.09802	2.46538	1.944	1.66887	8.43322	2.02488	2.08036
321.875	1.21029	1.14083	1.9199	1.41952	1.22707	1.36045	1.35636	2.37392	1.05596	5.44174	1.2683	1.77134	6.4516	6.06399	1.59204	1.22069	6.77959	7.81099	1.81773	1.53279	2.48353	2.35563		290.053	1.26823	1.69992	1.44083	1.14075	1.20418	1.21289	1.31316	1.13775	1.09728	2.40606	1.92001	1.65089	7.85238	2.00064	2.01154
322.5	1.22054	1.15802	1.87295	1.39102	1.26859	1.3764	1.3477	2.43725	1.04706	5.22291	1.29033	1.73491	6.22866	5.15162	1.72398	1.16792	6.41115	7.96622	1.75868	1.49433	2.44637	2.33484		290.616	1.22977	1.69508	1.44806	1.13702	1.2189	1.2054	1.30065	1.14172	1.09864	2.37898	1.91534	1.64203	6.76837	1.96221	2.00641
323.125	1.20974	1.15043	1.78075	1.41453	1.24781	1.35537	1.3527	2.54663	1.04301	4.93353	1.27167	1.60723	5.92964	4.10541	1.82144	1.13274	6.81045	7.54349	1.71667	1.41346	2.19535	2.28169		291.18	1.16703	1.73973	1.4864	1.13865	1.23768	1.20921	1.33801	1.14747	1.06719	2.42978	1.98264	1.62222	5.71242	1.97538	1.98483
323.75	1.21511	1.14176	1.77929	1.39004	1.24049	1.3417	1.34393	2.50298	1.04	4.87724	1.25596	1.58955	5.60443	3.51453	1.83153	1.13649	7.45064	7.05192	1.72378	1.39061	1.97779	2.21502		291.743	1.12574	1.83535	1.48629	1.12681	1.23098	1.21677	1.35832	1.16773	1.08215	2.51168	2.03733	1.59157	4.95316	2.03569	2.04111
324.375	1.20764	1.13456	1.83165	1.42428	1.25215	1.33338	1.32843	2.3697	1.04422	4.87373	1.24183	1.72939	5.36961	3.31035	1.77296	1.15407	8.22213	7.02485	1.74602	1.39407	1.94675	2.14494		292.306	1.08247	1.88736	1.47029	1.11334	1.23722	1.2384	1.34274	1.18171	1.12239	2.60165	2.05666	1.55821	4.47143	2.01462	2.02923
325	1.23542	1.12286	1.86273	1.56636	1.24536	1.32603	1.30811	2.1091	1.05053	4.89547	1.25085	1.84615	5.44291	3.15332	1.67063	1.1825	8.31979	7.16158	1.7598	1.42227	1.91845	2.19563		292.869	1.09506	1.91006	1.47984	1.10125	1.23135	1.2716	1.32468	1.18028	1.11914	2.64103	2.047	1.53199	4.16873	1.96603	2.03518
325.625	1.24774	1.12521	1.82664	1.61339	1.25158	1.3302	1.30023	1.86232	1.0518	4.97345	1.25943	1.87033	5.6959	3.31898	1.6034	1.20966	7.92776	7.29299	1.73625	1.42835	1.87559	2.37014		293.432	1.11164	1.92845	1.44851	1.13873	1.24487	1.30635	1.28736	1.18328	1.16479	2.66506	2.08557	1.5409	4.01603	1.96335	2.0448
326.25	1.24996	1.13248	1.79905	1.59822	1.25478	1.33955	1.31466	1.75566	1.04853	5.25193	1.25252	1.78512	5.69489	3.46358	1.64504	1.25082	7.98608	7.47267	1.65721	1.4865	1.92733	2.47103		293.996	1.15306	1.89481	1.44337	1.11136	1.22594	1.33372	1.33013	1.17855	1.16327	2.5622	2.17722	1.56623	3.95705	1.97478	2.05489
326.875	1.23673	1.12773	1.73928	1.55262	1.26111	1.30935	1.30813	1.72957	1.05159	5.49226	1.24281	1.75749	5.38081	3.81712	1.70352	1.281	8.58397	7.74609	1.62967	1.47431	1.98759	2.31987		294.559	1.14184	1.91128	1.43261	1.10555	1.20319	1.32996	1.32062	1.1687	1.15537	2.53486	2.20224	1.57471	3.98653	1.94866	1.99516
327.5	1.2357	1.12758	1.72366	1.5277	1.26704	1.33653	1.30137	1.72899	1.06075	5.54388	1.24848	1.70387	5.25455	4.41195	1.72371	1.30275	8.37765	7.96934	1.62817	1.42783	2.06217	2.10049		295.122	1.10788	1.81781	1.46844	1.11816	1.21089	1.30751	1.30393	1.17426	1.14367	2.66375	2.15792	1.55998	4.21746	1.99566	1.8712
328.125	1.26537	1.14763	1.67919	1.50804	1.25805	1.36703	1.3138	1.72239	1.0576	5.3346	1.24289	1.61175	5.31495	4.75695	1.69798	1.32312	7.89064	8.10341	1.60363	1.41935	2.07106	2.0332		295.685	1.08575	1.78098	1.45763	1.15624	1.22679	1.28479	1.27413	1.16631	1.12694	2.78058	2.07794	1.55798	4.5051	2.06877	1.74756
328.75	1.26834	1.13432	1.64899	1.56901	1.26804	1.35263	1.33514	1.74241	1.05623	4.94392	1.21618	1.63973	5.43519	4.48816	1.61831	1.28567	7.27209	7.90309	1.61945	1.41677	2.10207	2.09546		296.248	1.09588	1.77927	1.46674	1.13879	1.21431	1.28235	1.31165	1.16052	1.12325	2.88637	2.02979	1.55146	4.84881	2.07893	1.70134
329.375	1.23198	1.1133	1.61346	1.57866	1.26153	1.33507	1.37721	1.7694	1.04793	4.63124	1.22392	1.65078	5.62712	4.22448	1.52861	1.23427	7.06352	7.25423	1.71597	1.3692	2.06378	2.21532		296.812	1.0869	1.80318	1.45404	1.12266	1.22549	1.27395	1.29562	1.17074	1.09967	2.85633	1.99587	1.54469	5.22064	2.02721	1.69167
330	1.22753	1.09353	1.56763	1.58762	1.27609	1.3612	1.41929	1.81429	1.04478	4.59521	1.22721	1.64687	5.80252	3.75348	1.51055	1.18304	7.50257	6.64959	1.85702	1.34418	2.10109	2.37158		297.375	1.08272	1.81733	1.45698	1.12625	1.21825	1.27699	1.29787	1.16366	1.09693	2.69659	2.07386	1.56087	5.11536	1.96739	1.68057
330.625	1.22062	1.09059	1.527	1.51258	1.27741	1.38517	1.43082	1.85724	1.04707	4.67706	1.24454	1.64533	5.85122	3.62893	1.48274	1.14502	7.85111	6.48391	1.99894	1.39123	2.23544	2.64079		297.938	1.09559	1.81783	1.48042	1.16268	1.22842	1.30074	1.30649	1.17415	1.08289	2.59066	1.9726	1.56602	4.71896	1.99175	1.66773
331.25	1.22521	1.08957	1.55571	1.46068	1.28079	1.37141	1.39599	1.87676	1.0521	4.5645	1.25667	1.64789	5.73164	3.75464	1.41073	1.13726	8.10438	6.52433	1.97671	1.39976	2.1749	2.83101		298.501	1.09227	1.78767	1.45265	1.14509	1.2379	1.34719	1.26181	1.18058	1.10942	2.55598	1.92208	1.62094	4.44923	2.04972	1.70539
331.875	1.22572	1.09503	1.61584	1.43976	1.27183	1.37594	1.36819	1.84173	1.05567	4.39053	1.26304	1.74379	5.6401	4.10228	1.33512	1.16488	7.46936	6.5074	1.8176	1.37195	2.13101	2.44456		299.064	1.08396	1.76017	1.4653	1.12645	1.23435	1.45183	1.32222	1.17499	1.10681	2.57807	1.83705	1.67854	4.49323	2.05729	1.75131
332.5	1.21859	1.10444	1.64808	1.49372	1.2499	1.37897	1.36244	1.83418	1.06099	4.46241	1.26793	1.91807	5.79257	4.58639	1.31193	1.1824	7.28305	6.3828	1.70737	1.32731	2.12154	2.19459		299.628	1.07293	1.77496	1.45796	1.12368	1.19479	1.50276	1.3254	1.17097	1.09788	2.64356	1.76507	1.66264	4.59792	1.99653	1.74787
333.125	1.22392	1.09864	1.73722	1.514	1.2623	1.36553	1.32997	1.76578	1.078	4.49124	1.27975	2.05672	5.96152	5.32281	1.3329	1.18679	6.91799	6.23875	1.6357	1.31192	2.13667	2.16442		300.191	1.08548	1.81481	1.44685	1.10865	1.20726	1.50858	1.28793	1.17508	1.09724	2.69663	1.72072	1.64216	4.63547	1.97087	1.7722
333.75	1.24647	1.10152	1.84738	1.5248	1.28905	1.33436	1.31583	1.73197	1.07428	4.57594	1.30232	2.1482	6.05692	5.88139	1.37349	1.15214	6.34131	6.1868	1.65198	1.30069	2.0766	2.13929		300.754	1.07776	1.81767	1.42748	1.11095	1.21688	1.5143	1.289	1.17188	1.1199	2.67901	1.7023	1.62517	4.66664	1.92295	1.76268
334.375	1.29235	1.12956	1.76929	1.50259	1.30215	1.31579	1.32303	1.72772	1.07642	4.80011	1.32866	2.09921	6.04704	4.95174	1.45449	1.13859	5.87808	6.14617	1.70564	1.29876	2.08315	2.12506		301.317	1.08366	1.85437	1.43933	1.11453	1.2229	1.54666	1.30799	1.16168	1.16158	2.5727	1.72567	1.59785	4.73095	1.833	1.79211
335	1.31617	1.1554	1.71684	1.48173	1.31841	1.31453	1.32225	1.71742	1.09438	4.96574	1.36641	1.98889	5.97717	4.18718	1.49169	1.16669	5.80097	6.03497	1.74709	1.30811	2.07855	2.15097		301.881	1.07788	1.84546	1.44879	1.1134	1.19895	1.51346	1.28467	1.14358	1.14207	2.49514	1.73411	1.6125	4.69956	1.82804	1.87148
335.625	1.34631	1.16258	1.74718	1.50712	1.30193	1.31955	1.32358	1.74436	1.09027	5.11442	1.38709	2.01076	5.88888	3.75555	1.44779	1.17811	6.16175	6.07366	1.75276	1.33615	1.99681	2.07546		302.444	1.04372	1.96462	1.44644	1.10813	1.21606	1.48361	1.34857	1.12694	1.13567	2.46267	1.72544	1.65057	4.6658	1.79051	1.90587
336.25	1.31087	1.14408	1.81086	1.54254	1.31354	1.32545	1.32062	1.75587	1.08198	5.43893	1.39812	2.02809	5.88995	3.1258	1.43756	1.17519	6.3289	6.34607	1.73853	1.35979	1.84362	2.00732		303.007	1.01715	2.03718	1.44082	1.13346	1.24885	1.47455	1.40464	1.13327	1.12595	2.40023	1.77732	1.65948	4.61867	1.82268	1.8701
336.875	1.28737	1.1318	1.94777	1.53531	1.32997	1.32617	1.31431	1.79474	1.08922	5.85842	1.4044	2.03705	5.95003	2.81271	1.47119	1.14556	6.27975	6.64831	1.6831	1.35046	1.70233	2.02742		303.57	1.03208	1.97236	1.43707	1.13917	1.28155	1.44825	1.40115	1.15028	1.10232	2.43758	1.86924	1.64195	4.51559	1.81587	1.94362
337.5	1.27138	1.14027	2.05901	1.46793	1.32619	1.32863	1.31499	1.86909	1.10234	6.08024	1.3958	2.18408	5.92704	2.71801	1.4953	1.11182	5.79962	6.80821	1.66269	1.34407	1.65664	2.07263		304.133	1.08502	1.87273	1.44364	1.1513	1.2649	1.39337	1.35536	1.15932	1.09289	2.48802	1.89915	1.66062	4.43637	1.85286	1.98854
338.125	1.2491	1.14922	1.9758	1.47009	1.29428	1.30512	1.31938	1.96072	1.10073	6.1505	1.37312	2.2672	5.76352	2.65785	1.40436	1.11689	5.23569	6.93139	1.71654	1.37507	1.67348	2.21159		304.697	1.09232	1.80443	1.43775	1.12883	1.2762	1.39741	1.32315	1.16534	1.11106	2.56279	1.90307	1.69249	4.3698	1.88493	2.0977
338.75	1.24223	1.15784	1.8333	1.4197	1.25	1.3011	1.32643	2.09322	1.09887	6.31483	1.34464	2.13546	5.74985	2.5914	1.27513	1.12176	4.99684	7.11971	1.78946	1.36714	1.68685	2.09009		305.26	1.06196	1.7788	1.4131	1.14369	1.28774	1.45074	1.32626	1.16084	1.14425	2.73797	1.88848	1.69718	4.34861	1.91593	2.12039
339.375	1.26831	1.15941	1.69767	1.41136	1.25548	1.32169	1.30764	2.19141	1.09082	6.55656	1.31913	1.87117	5.88629	2.82048	1.25607	1.11616	4.98547	7.30374	1.84808	1.36932	1.59655	1.98803		305.823	1.05967	1.79078	1.43955	1.12651	1.27783	1.44903	1.34814	1.16232	1.12081	3.08701	1.84472	1.66836	4.3262	1.93719	2.07966
340	1.33661	1.14412	1.635	1.44615	1.25598	1.31493	1.30023	2.24268	1.07913	6.81058	1.29956	1.75884	6.20039	3.27576	1.25641	1.11237	4.80559	7.32415	1.8982	1.37051	1.60538	1.90742		306.386	1.09661	1.83693	1.46179	1.17609	1.279	1.42052	1.3375	1.16736	1.09957	3.58509	1.80078	1.63423	4.16291	1.90536	2.04842
340.625	1.41069	1.14274	1.63072	1.45928	1.31907	1.34413	1.29323	2.1696	1.07301	7.01802	1.27799	1.76368	6.54412	3.48171	1.29161	1.09945	4.98333	7.05355	1.94884	1.29919	1.65286	1.90216		306.949	1.09273	1.84635	1.45736	1.16666	1.2677	1.39977	1.32491	1.17447	1.10284	4.08614	1.81362	1.62221	4.01526	1.94792	2.03098
341.25	1.45473	1.1495	1.62204	1.47012	1.32073	1.35795	1.26724	2.08989	1.06061	6.7996	1.26202	1.85606	6.58413	3.60183	1.38765	1.07809	5.05059	6.71599	1.96158	1.27353	1.64328	1.99377		307.513	1.09127	1.87259	1.46378	1.18111	1.25323	1.43303	1.32045	1.16159	1.09998	4.09927	1.83186	1.60357	3.95785	1.93236	2.00341
341.875	1.4357	1.14349	1.59254	1.44682	1.36093	1.37009	1.27429	2.08606	1.06968	6.42252	1.25393	1.91783	6.26998	3.36291	1.43759	1.09377	5.11601	6.56212	1.90901	1.28338	1.53765	2.01584		308.076	1.07278	1.79638	1.44533	1.17469	1.26564	1.54919	1.34892	1.16334	1.12329	3.75957	1.86771	1.6002	4.04789	1.9963	1.97413
342.5	1.41721	1.14824	1.57307	1.42008	1.42173	1.39584	1.26689	2.22719	1.0982	6.20347	1.27926	1.9129	5.94628	3.25677	1.40249	1.09242	5.32403	6.52523	1.8396	1.27406	1.53771	2.00339		308.639	1.09572	1.73961	1.43902	1.17248	1.26075	1.68185	1.29199	1.17228	1.13253	3.26721	1.8678	1.59968	4.34221	2.00231	2.00631
343.125	1.42977	1.14217	1.56692	1.43768	1.45118	1.39166	1.27591	2.53447	1.1105	6.07065	1.33958	2.008	6.00706	3.10831	1.28734	1.07735	5.08448	6.44022	1.78132	1.228	1.7332	2.10507		309.202	1.11467	1.79279	1.48054	1.16291	1.27574	1.77141	1.29173	1.17915	1.13018	3.03382	1.89489	1.63202	4.60285	1.92614	2.06013
343.75	1.48469	1.14875	1.55531	1.41912	1.38121	1.42374	1.30518	2.72185	1.092	6.03901	1.38782	2.08542	6.10512	3.02226	1.22287	1.06511	4.94603	6.34765	1.74456	1.21153	1.85571	2.2974		309.765	1.1022	1.80062	1.46763	1.16158	1.27723	1.78926	1.33742	1.18802	1.13567	2.95336	1.91449	1.66084	4.65783	1.94519	2.03886
344.375	1.51517	1.15811	1.48994	1.46622	1.43772	1.44124	1.33145	2.62382	1.06188	6.31581	1.40985	2.09107	5.80077	3.17183	1.19431	1.07657	5.4343	6.27778	1.71599	1.19377	1.93667	2.4727		310.329	1.11511	1.79327	1.48011	1.17832	1.26661	1.72145	1.29468	1.20179	1.16524	2.89216	1.94949	1.68944	4.67178	1.8946	2.11759
345	1.48824	1.15944	1.43146	1.47741	1.47179	1.45097	1.32883	2.53311	1.05899	6.85182	1.47594	2.00786	5.44147	3.36633	1.19131	1.10112	6.31619	6.26876	1.66625	1.19317	2.05277	2.42894		310.892	1.08868	1.83371	1.48068	1.15578	1.28217	1.5917	1.30004	1.20547	1.14785	2.91813	1.90484	1.6759	4.80649	1.83432	2.1587
345.625	1.44614	1.15826	1.41655	1.4491	1.45396	1.44143	1.3207	2.56667	1.06739	7.1962	1.65784	2.09906	5.33127	3.27026	1.19216	1.13355	7.44701	6.40351	1.59901	1.19958	2.22392	2.28876		311.455	1.04533	1.84253	1.47679	1.15483	1.28671	1.46943	1.28435	1.21605	1.13471	3.04623	1.89932	1.66746	4.8446	1.80891	2.17263
346.25	1.40667	1.13466	1.42296	1.43962	1.49517	1.45123	1.3007	2.62926	1.06872	6.77669	1.70832	2.13523	5.42674	2.96514	1.20282	1.16365	6.94158	6.58641	1.55743	1.23147	2.31818	2.22233		312.018	1.06556	1.79511	1.44801	1.17611	1.26099	1.40966	1.32027	1.2077	1.11192	3.11967	1.89319	1.67199	4.69964	1.82411	2.18091
346.875	1.35132	1.12009	1.44481	1.48096	1.48753	1.44562	1.27462	2.60128	1.07035	6.22747	1.62706	2.09274	5.5847	2.92364	1.17311	1.14898	6.16114	6.63159	1.5255	1.22685	2.34787	2.34067		312.582	1.05674	1.76208	1.44687	1.16618	1.22639	1.40437	1.32989	1.21796	1.11456	3.19976	1.92686	1.68219	4.61471	1.79731	2.25468
347.5	1.37587	1.11319	1.45815	1.55215	1.49254	1.44768	1.26999	2.5893	1.06964	6.10386	1.535	2.09876	5.61741	2.92821	1.139	1.12512	5.89311	6.55735	1.50144	1.20106	2.2374	2.5591		313.145	1.04383	1.7433	1.45493	1.18161	1.26909	1.4302	1.33132	1.23737	1.1257	3.34731	1.89163	1.66523	4.49928	1.7929	2.37123
348.125	1.33567	1.11606	1.47032	1.56875	1.51267	1.41076	1.2906	2.51152	1.06544	6.01816	1.58179	2.09067	5.32047	3.35678	1.11604	1.11536	5.43451	6.5012	1.50871	1.22145	1.99223	2.6811		313.708	1.04184	1.75958	1.45834	1.14932	1.25799	1.46703	1.35132	1.25132	1.13068	3.53756	1.86973	1.65425	4.31998	1.78439	2.44935
348.75	1.29602	1.14167	1.46834	1.53184	1.52263	1.4024	1.35339	2.351	1.06806	5.67739	1.62611	1.9537	5.06394	3.69202	1.08781	1.08964	4.82965	6.53567	1.5347	1.2413	1.81803	2.77042		314.271	1.06236	1.77076	1.45025	1.15491	1.25167	1.49646	1.30029	1.24639	1.11213	3.62992	1.8887	1.64482	4.25241	1.82361	2.50512
349.375	1.27257	1.15271	1.49509	1.58888	1.50818	1.3995	1.45669	2.31036	1.07144	5.19626	1.63848	1.78274	4.94885	4.05345	1.05955	1.07053	4.53929	6.70172	1.55065	1.24897	1.84727	2.61304		314.834	1.03872	1.76958	1.45881	1.13394	1.24441	1.53049	1.28963	1.21737	1.11887	3.71452	1.87054	1.63297	4.33667	1.88406	2.37414
350	1.26173	1.14764	1.54071	1.56838	1.50667	1.38207	1.49451	2.28483	1.07898	4.89548	1.57621	1.63204	4.75309	4.17548	1.05176	1.08473	4.70067	6.82407	1.5297	1.24555	1.89852	2.31867		315.398	1.06752	1.73566	1.45322	1.13161	1.24457	1.52861	1.30323	1.20288	1.09134	3.59918	1.82286	1.61801	4.4596	1.96214	2.44047
350.625	1.24193	1.12378	1.52942	1.47292	1.47327	1.38707	1.45315	2.25245	1.0757	4.79826	1.60353	1.54613	4.52052	4.31687	1.0613	1.10695	5.13532	6.72422	1.46757	1.22282	1.82932	2.13906		315.961	1.0875	1.66167	1.42427	1.15147	1.2651	1.5107	1.31501	1.21014	1.09918	3.53625	1.76359	1.63815	4.58526	2.07751	2.72712
351.25	1.23054	1.11039	1.50003	1.45124	1.46654	1.39377	1.39947	2.14576	1.06101	4.74336	1.66438	1.48219	4.312	4.33483	1.06437	1.10094	5.31374	6.65795	1.40043	1.18472	1.74087	2.05477		316.524	1.06465	1.65425	1.41945	1.18464	1.28296	1.49158	1.34514	1.22602	1.12122	3.49663	1.73943	1.70058	4.62088	2.16632	3.03825
351.875	1.23763	1.11771	1.46849	1.44077	1.47177	1.43145	1.37926	2.20904	1.06712	4.5827	1.65689	1.51844	4.21966	4.36792	1.05994	1.10767	4.86291	6.93761	1.36315	1.16892	1.74046	2.0062		317.087	1.06757	1.74844	1.45324	1.18947	1.28325	1.46423	1.3394	1.22949	1.10226	3.4152	1.72762	1.75399	4.77534	2.11505	3.2647
352.5	1.26508	1.11832	1.46649	1.40875	1.49066	1.46905	1.36949	2.19388	1.08852	4.62987	1.64136	1.56941	4.22719	4.02385	1.0622	1.12297	4.68317	7.2696	1.34555	1.16682	1.70734	1.94984		317.65	1.04984	1.73466	1.39773	1.15293	1.26325	1.41701	1.32388	1.21941	1.12046	3.50887	1.75337	1.75276	5.12454	2.01237	3.44184
353.125	1.26683	1.10576	1.4814	1.46508	1.52767	1.4786	1.35049	2.14573	1.10411	4.80602	1.67643	1.71838	4.31489	4.05004	1.06749	1.09981	4.44914	7.33725	1.3384	1.16996	1.64224	1.94248		318.214	1.03108	1.70954	1.39485	1.16527	1.27321	1.39861	1.33297	1.20724	1.14526	3.58657	1.76254	1.7002	5.44263	1.91949	3.30614
353.75	1.26559	1.10852	1.47625	1.553	1.49588	1.4985	1.32726	2.14258	1.09172	4.84035	1.65888	1.81269	4.51306	3.93995	1.07174	1.07331	4.5642	7.13899	1.32735	1.21735	1.69284	1.91926		318.777	1.05226	1.70733	1.40427	1.15047	1.26417	1.44247	1.33006	1.2143	1.13403	3.30049	1.76971	1.65099	5.5784	1.87513	3.12694
354.375	1.24589	1.11718	1.43863	1.55459	1.44752	1.48088	1.30383	2.19054	1.07504	4.85641	1.57743	1.74408	4.63206	3.72712	1.08198	1.05736	4.7089	6.96739	1.30514	1.28035	1.7786	1.91855		319.34	1.06178	1.68445	1.39807	1.15372	1.25308	1.51199	1.28498	1.20015	1.11273	2.87226	1.77808	1.64283	5.67616	1.87028	3.10646
355	1.24951	1.11574	1.42545	1.59138	1.43512	1.43659	1.30049	2.28071	1.06927	4.96682	1.52864	1.73937	4.61571	3.40536	1.08441	1.04649	4.6895	6.97581	1.29876	1.42613	1.86151	1.96263		319.903	1.08624	1.71656	1.4175	1.13786	1.27269	1.60221	1.30712	1.20143	1.11369	2.60498	1.77115	1.61422	5.65973	1.86185	3.0919
355.625	1.2617	1.11125	1.44657	1.57777	1.38626	1.44828	1.31878	2.42974	1.07076	5.31015	1.50753	1.7995	4.62976	3.11022	1.08034	1.05963	4.59155	7.16695	1.30475	1.51492	1.76057	1.98373		320.466	1.08781	1.71781	1.41966	1.14459	1.28153	1.70089	1.28637	1.19786	1.12052	2.55689	1.76773	1.66228	5.61708	1.86932	3.08513
356.25	1.28328	1.11766	1.47221	1.55525	1.44075	1.46997	1.33184	2.53887	1.06446	5.80449	1.49661	1.78266	4.51875	3.08738	1.07433	1.06904	4.9235	7.21779	1.33058	1.47158	1.60757	2.03346		321.03	1.07902	1.72747	1.417	1.14665	1.28488	1.82213	1.30666	1.20331	1.1295	2.73499	1.75992	1.72822	5.84144	1.92882	3.08327
356.875	1.28585	1.11558	1.54708	1.47009	1.47935	1.44556	1.3249	2.49315	1.05829	6.12773	1.52038	1.75351	4.38668	3.26528	1.07564	1.03545	5.36037	7.12217	1.35861	1.41996	1.49941	2.23046		321.593	1.09174	1.69255	1.40124	1.16164	1.24862	1.98555	1.3005	1.19323	1.1558	3.07541	1.78836	1.76648	6.09299	1.97692	3.19691
357.5	1.29079	1.13215	1.64277	1.4377	1.47266	1.39218	1.31213	2.3937	1.06466	5.63958	1.57154	1.7248	4.50634	3.32951	1.08243	1.02654	5.25562	7.22478	1.36264	1.35183	1.67915	2.63226		322.156	1.08515	1.71031	1.38872	1.16191	1.27195	1.99558	1.32438	1.19713	1.13654	3.42782	1.76088	1.78197	6.13662	1.95036	3.25953
358.125	1.28143	1.14276	1.71487	1.42077	1.46104	1.40011	1.33694	2.31379	1.06236	4.87374	1.60613	1.72441	4.79597	3.37676	1.08782	1.02861	5.7513	7.50202	1.35579	1.33161	1.91024	2.69791		322.719	1.10181	1.70725	1.44915	1.16617	1.29685	1.96015	1.31137	1.20286	1.14431	3.60648	1.73513	1.76004	5.56693	1.96788	3.27516
358.75	1.28755	1.13862	1.74454	1.40817	1.47172	1.40275	1.35428	2.22183	1.05519	4.57408	1.60001	1.78651	4.95626	3.39735	1.10311	1.03391	5.35175	8.00563	1.32851	1.44872	2.1292	2.4674		323.283	1.08759	1.73895	1.52949	1.15812	1.30797	1.75705	1.30208	1.21859	1.12905	3.33274	1.73957	1.74607	4.81439	2.00534	3.27001
359.375	1.30259	1.14053	1.76453	1.4186	1.52675	1.41308	1.35504	2.17925	1.05715	4.66402	1.59494	1.86056	5.09495	3.41475	1.10872	1.02955	4.58904	8.58961	1.27682	1.63904	2.33558	2.30857		323.846	1.09811	1.69982	1.4625	1.16264	1.29882	1.63973	1.31926	1.2111	1.14215	3.11173	1.82008	1.7422	4.48432	1.98095	3.33757
360	1.31769	1.14802	1.78893	1.40754	1.52036	1.45623	1.35954	2.14139	1.05806	4.85198	1.57271	1.97729	5.3697	3.24173	1.13618	1.03129	4.1413	8.81105	1.22123	1.91034	2.4961	2.30633		324.409	1.11322	1.68377	1.42211	1.17048	1.2834	1.57525	1.31842	1.22843	1.16559	3.02569	1.86676	1.72303	4.32711	1.99136	3.26603
360.625	1.31288	1.14712	1.75304	1.37171	1.52809	1.47014	1.36943	2.05997	1.05351	4.98701	1.57893	1.75765	5.52994	3.00027	1.21442	1.02352	4.09835	8.50193	1.17793	1.80226	2.54344	2.39741		324.972	1.10697	1.70435	1.40408	1.18688	1.28734	1.54441	1.34976	1.21684	1.14998	2.96405	1.84446	1.72742	4.21813	2.06316	3.15636
361.25	1.29276	1.13733	1.71662	1.37278	1.48248	1.44317	1.37571	1.93998	1.05241	5.10357	1.57233	1.58254	5.65874	2.78703	1.29373	0.998025	4.5279	8.13809	1.18465	1.55412	2.73455	2.41721		325.535	1.11832	1.6956	1.41632	1.17478	1.2954	1.55977	1.40599	1.21796	1.14575	2.80817	1.82406	1.73477	4.16963	2.22113	3.19949
361.875	1.30575	1.1251	1.68333	1.39393	1.45316	1.42925	1.36828	1.83635	1.05632	5.48258	1.54434	1.50111	6.10302	2.78987	1.27412	0.984003	5.07664	7.85072	1.20986	1.47123	2.61893	2.29403		326.099	1.10553	1.69893	1.44344	1.16106	1.3249	1.55141	1.41411	1.20524	1.14884	2.75653	1.85669	1.75372	4.19484	2.3425	3.22464
362.5	1.31214	1.12209	1.60226	1.41618	1.43802	1.41245	1.37186	1.81767	1.05287	6.0441	1.49696	1.45492	6.35422	2.67768	1.20918	0.98412	5.76989	7.69964	1.22057	1.58571	2.19959	2.37977		326.662	1.09563	1.70119	1.44004	1.17106	1.31027	1.5787	1.38723	1.18076	1.16617	2.6782	1.92133	1.73993	4.26807	2.38704	3.34121
363.125	1.29703	1.11522	1.54406	1.37835	1.43635	1.44927	1.38057	1.8152	1.06288	6.45232	1.49083	1.4807	6.35394	2.63015	1.12609	0.991982	6.47965	7.7248	1.24546	1.74419	2.07855	2.49959		327.225	1.07166	1.64442	1.4246	1.15245	1.29846	1.68584	1.32824	1.20176	1.13113	2.62621	1.96235	1.74819	4.30539	2.45191	3.31932
363.75	1.30906	1.11828	1.50377	1.37703	1.46692	1.47843	1.36639	1.8323	1.07358	6.62343	1.48858	1.4693	6.13016	2.71497	1.07507	1.00426	6.87516	7.98569	1.27355	1.90179	1.95705	2.535		327.788	1.07352	1.65094	1.43988	1.13906	1.29497	1.78503	1.34968	1.22884	1.12638	2.55035	1.97321	1.82046	4.31269	2.66034	3.20291
364.375	1.31716	1.13349	1.47582	1.35676	1.47501	1.49808	1.36369	1.91296	1.06436	6.36941	1.5112	1.44912	5.85529	2.7245	1.06771	1.0093	6.88904	8.28799	1.29421	1.87796	1.8484	2.69433		328.351	1.08845	1.69772	1.42348	1.1527	1.27562	1.84639	1.29081	1.2463	1.13385	2.44596	1.99963	1.84912	4.36658	2.70551	3.08303
365	1.29458	1.13619	1.44532	1.38169	1.4362	1.4725	1.37534	1.95095	1.05291	5.83152	1.59389	1.60753	5.72721	2.86193	1.09029	1.02458	6.82102	8.41268	1.32296	1.73401	1.65896	2.70963		328.915	1.10249	1.70941	1.4273	1.16942	1.29381	1.87839	1.29985	1.25136	1.14688	2.38301	1.96234	1.82668	4.37633	2.48808	2.96899
365.625	1.29608	1.11709	1.41151	1.3823	1.39341	1.41185	1.37934	1.85458	1.0495	5.5099	1.7287	1.72858	5.77029	2.89883	1.09839	1.01786	6.27443	8.69825	1.39035	1.61754	1.4586	2.82468		329.478	1.10457	1.67306	1.39868	1.16477	1.28166	1.76112	1.29979	1.24085	1.12969	2.37449	1.88383	1.75279	4.33284	2.23178	2.88109
366.25	1.29424	1.12473	1.39636	1.35385	1.35816	1.39952	1.37718	1.80663	1.05523	5.55737	1.82971	1.81722	5.73863	2.89549	1.11976	1.00035	5.59729	9.41684	1.48437	1.55156	1.3854	2.65799		330.041	1.07032	1.65911	1.39059	1.15476	1.28235	1.65642	1.30841	1.24153	1.11318	2.33424	1.78545	1.72154	4.36244	2.13165	2.82209
366.875	1.28279	1.13557	1.44412	1.358	1.37811	1.43957	1.38797	1.84906	1.05139	5.78684	1.87991	1.76281	5.63646	2.81373	1.12408	0.994298	5.26858	10.0805	1.57473	1.60572	1.36432	2.16569		330.604	1.0849	1.65173	1.38641	1.13788	1.26734	1.67245	1.31078	1.24635	1.11735	2.32637	1.75247	1.72395	4.32316	2.08111	2.86534
367.5	1.27483	1.1324	1.49884	1.35239	1.42229	1.49161	1.38236	1.83745	1.04766	5.91821	1.7993	1.7738	5.72172	2.75947	1.09686	1.0087	5.44179	9.68931	1.61013	1.5549	1.37561	2.14354		331.167	1.05424	1.65448	1.41513	1.15868	1.24845	1.77253	1.3378	1.23805	1.11968	2.34288	1.77208	1.74029	4.27828	2.04442	2.78128
368.125	1.28177	1.12064	1.53266	1.36209	1.39399	1.5492	1.35157	1.77517	1.03703	5.73202	1.72912	1.9297	5.87173	2.97415	1.08442	1.01375	5.44248	8.65807	1.59978	1.44343	1.31208	2.25566		331.731	1.09151	1.6718	1.42258	1.15345	1.283	1.835	1.38048	1.24771	1.12029	2.4194	1.8117	1.74692	4.07708	2.21397	2.70021
368.75	1.2806	1.12203	1.54831	1.38353	1.35677	1.55166	1.30659	1.72991	1.0331	5.34737	1.71566	2.17075	5.98622	3.48035	1.09635	1.00969	5.54056	8.31227	1.52775	1.39722	1.27286	2.28128		332.294	1.17161	1.65734	1.44409	1.14115	1.28853	1.74246	1.39461	1.27251	1.12177	2.49185	1.74984	1.7304	3.72033	2.30805	2.61669
369.375	1.26606	1.12426	1.56837	1.34839	1.34892	1.49773	1.26676	1.73418	1.04325	5.07465	1.69585	2.48132	6.0947	3.96575	1.12739	1.01056	5.82786	8.37882	1.40245	1.42662	1.24642	2.20145		332.857	1.219	1.69885	1.44987	1.14465	1.30439	1.64997	1.39545	1.27769	1.15107	2.54181	1.73237	1.69796	3.56537	2.19621	2.56617
370	1.27616	1.12953	1.61031	1.36442	1.32397	1.46108	1.24587	1.74005	1.05867	5.08596	1.66063	2.37331	5.9295	4.10308	1.13415	1.0111	6.11143	8.00147	1.26113	1.40867	1.28979	2.21239		333.42	1.24284	1.70612	1.43089	1.1424	1.30211	1.61556	1.32731	1.2724	1.17073	2.58058	1.73207	1.69438	3.59025	2.00975	2.63534
370.625	1.30689	1.12022	1.67354	1.39494	1.33685	1.46438	1.2483	1.76688	1.06839	5.17615	1.62517	2.28269	5.59354	4.19605	1.08388	1.02232	6.68689	7.60075	1.15653	1.32243	1.30221	2.08661		333.984	1.32898	1.69202	1.41749	1.13096	1.2781	1.62858	1.32731	1.26965	1.1477	2.54424	1.78891	1.67391	3.58318	1.80708	2.77206
371.25	1.37349	1.10459	1.77652	1.38697	1.33795	1.52142	1.25163	1.78388	1.07952	5.01565	1.61408	2.2939	5.58214	4.02865	1.06463	1.02811	7.51756	7.52383	1.10381	1.27444	1.30508	1.94232		334.547	1.42165	1.685	1.40418	1.12943	1.28128	1.64003	1.28254	1.29029	1.11961	2.53017	1.79121	1.68337	3.6033	1.76662	2.86877
371.875	1.40566	1.11088	1.76326	1.36243	1.38019	1.56091	1.27478	1.84555	1.0812	4.71751	1.63412	2.28241	5.85702	4.01717	1.06013	1.02493	7.69123	7.80401	1.08215	1.27837	1.30631	2.04536		335.11	1.33636	1.66368	1.41046	1.12768	1.2944	1.66564	1.3217	1.31102	1.12708	2.49205	1.84994	1.77414	3.55893	1.74038	2.81078
372.5	1.44853	1.13001	1.65959	1.36687	1.35722	1.47541	1.30774	1.90032	1.06963	4.55663	1.68623	2.32173	5.98747	4.10595	1.0452	1.02879	6.70291	8.36505	1.08425	1.26963	1.28248	2.29849		335.673	1.30475	1.66298	1.37109	1.11163	1.30449	1.64997	1.32512	1.32858	1.1533	2.46954	1.91667	1.91111	3.34707	1.7499	2.69005
373.125	1.42923	1.14194	1.61361	1.34727	1.37078	1.46778	1.33294	1.92954	1.05692	4.61774	1.73401	2.31546	5.92909	4.14743	1.03971	1.02532	5.66345	8.89996	1.09534	1.27364	1.26848	2.32531		336.236	1.32872	1.62533	1.38381	1.1448	1.31843	1.60635	1.32935	1.31559	1.15692	2.48997	1.985	1.98383	3.09063	1.7887	2.61608
373.75	1.40064	1.14584	1.54665	1.34956	1.39711	1.4467	1.31854	1.96598	1.05374	4.66619	1.77284	2.31616	5.88991	4.16977	1.04739	1.03682	4.9147	8.75621	1.10459	1.33294	1.26105	2.16778		336.8	1.30925	1.64776	1.40868	1.13544	1.301	1.54462	1.33723	1.31014	1.13481	2.54892	2.06507	1.94335	3.04848	1.75072	2.61877
374.375	1.40012	1.13867	1.46963	1.34382	1.38949	1.4345	1.2947	2.02786	1.04186	4.48409	1.79517	2.21754	5.72634	4.24481	1.06575	1.03629	4.29181	8.26278	1.10991	1.37521	1.21108	2.18106		337.363	1.19923	1.66677	1.41579	1.17323	1.31604	1.49882	1.32851	1.30998	1.17885	2.61013	2.05388	1.92065	3.09434	1.75277	2.63175
375	1.39456	1.12679	1.42696	1.39227	1.40576	1.41062	1.28906	2.03217	1.03481	4.06584	1.77115	1.93996	5.50575	4.44225	1.07824	1.03506	4.18961	7.90022	1.10571	1.33201	1.15415	2.15481		337.926	1.14472	1.72013	1.41909	1.15678	1.30078	1.47417	1.34796	1.29931	1.20231	2.70213	1.90866	1.89439	3.12581	1.70754	2.60559
375.625	1.39107	1.12036	1.40883	1.46644	1.46185	1.33785	1.29301	2.04756	1.03547	3.77468	1.69468	1.9122	5.30148	4.72683	1.08324	1.04043	4.37942	7.9015	1.10037	1.32031	1.14422	1.93948		338.489	1.10893	1.69705	1.41222	1.13988	1.30683	1.47532	1.33582	1.30103	1.20595	2.79889	1.78856	1.83102	3.1044	1.76254	2.59522
376.25	1.37543	1.11935	1.40118	1.49534	1.5062	1.33661	1.2901	2.06992	1.02786	3.66679	1.57444	1.95703	5.19881	4.93032	1.08076	1.03464	4.85786	8.26239	1.10148	1.3153	1.12366	1.80031		339.052	1.10184	1.69274	1.4129	1.15624	1.3187	1.49151	1.34331	1.29261	1.17383	2.79408	1.69934	1.79622	3.05866	1.76507	2.54686
376.875	1.36241	1.10998	1.41551	1.45157	1.47167	1.348	1.27997	2.14912	1.02927	3.63609	1.48913	1.87435	5.2606	4.93983	1.05764	1.04086	5.76612	8.79272	1.1104	1.32907	1.13286	1.79275		339.616	1.11404	1.66702	1.44426	1.14703	1.30967	1.48976	1.30153	1.31495	1.18395	2.75131	1.71783	1.75947	3.03963	1.81304	2.62725
377.5	1.36841	1.10553	1.43208	1.42039	1.37748	1.39711	1.26299	2.26831	1.04813	3.66399	1.46628	1.80133	5.5212	5.08238	1.04413	1.04027	5.92233	9.43619	1.11787	1.32524	1.21704	1.83818		340.179	1.10078	1.66424	1.49098	1.16421	1.3138	1.47912	1.30521	1.33689	1.18874	2.80016	1.76158	1.74594	3.07967	1.95515	2.69921
378.125	1.37688	1.09503	1.44602	1.42506	1.32195	1.40447	1.26072	2.3196	1.06437	3.76586	1.46931	1.84995	5.82336	5.10434	1.08646	1.01669	5.64329	10.1201	1.12241	1.32375	1.27667	1.87012		340.742	1.06972	1.66071	1.50147	1.16956	1.31344	1.45852	1.30664	1.35302	1.20303	2.87696	1.76844	1.71885	3.13959	2.10281	2.77161
378.75	1.40258	1.10035	1.44986	1.43864	1.28971	1.4239	1.26997	2.31196	1.07112	3.85725	1.48075	1.85941	5.77866	4.96289	1.14612	1.00313	5.60613	10.4244	1.12576	1.40117	1.2665	1.92422		341.305	1.04777	1.67142	1.51525	1.1497	1.30626	1.47468	1.35286	1.41704	1.18885	2.8445	1.78277	1.68581	3.1879	2.10138	2.97475
379.375	1.4457	1.10552	1.49192	1.41134	1.29659	1.54195	1.25887	2.29868	1.08618	3.87174	1.50244	1.90093	5.32392	4.88028	1.15365	0.999041	5.67492	10.108	1.126	1.42072	1.22182	1.94031		341.868	1.05525	1.72439	1.49589	1.12994	1.31425	1.50989	1.35201	1.56788	1.20556	2.7421	1.79431	1.66615	3.15894	2.05192	3.12952
380	1.46493	1.11301	1.6081	1.39995	1.315	1.71812	1.24804	2.27104	1.08628	3.81282	1.56381	1.93779	4.9219	4.9356	1.14394	0.999767	5.74168	9.54647	1.12027	1.38819	1.15022	1.87261		342.432	1.07812	1.69093	1.46874	1.12024	1.31697	1.53383	1.36086	1.87156	1.20692	2.68195	1.76382	1.62997	3.04227	2.08606	3.02248
380.625	1.46687	1.1093	1.63315	1.38327	1.31518	1.78603	1.25249	2.21634	1.06055	3.80201	1.78581	1.93255	4.87403	4.91237	1.13901	1.00113	5.68168	9.05671	1.1079	1.38554	1.1351	1.86647		342.995	1.10425	1.72676	1.43387	1.16341	1.3221	1.49085	1.33624	2.03619	1.20877	2.73695	1.73514	1.61056	2.92656	2.05189	2.91869
381.25	1.51626	1.11449	1.47459	1.37852	1.3427	1.761	1.26496	2.10852	1.03397	3.96902	2.04918	1.97361	4.90994	4.65237	1.09498	1.01115	5.67211	8.73549	1.09619	1.38314	1.12033	1.9009		343.558	1.11161	1.73705	1.45262	1.14692	1.36008	1.42857	1.29825	1.78976	1.18311	2.91843	1.65492	1.6213	2.84999	2.01193	2.84031
381.875	1.55775	1.11759	1.38853	1.38309	1.39066	1.6911	1.28764	2.11993	1.03085	4.1795	1.96324	2.08975	4.88456	4.38602	1.05602	1.02201	5.91151	8.58325	1.09195	1.38974	1.09891	1.80238		344.121	1.05065	1.73287	1.47283	1.12919	1.32885	1.37217	1.3181	1.57147	1.14262	3.02152	1.68126	1.64608	2.81245	1.97318	2.84566
382.5	1.59408	1.12716	1.38351	1.35543	1.42484	1.55963	1.27791	2.12908	1.02358	4.2889	1.88212	2.13321	4.8299	4.3523	1.08433	1.02093	5.88916	8.43351	1.09672	1.40092	1.07171	1.73286		344.685	1.03614	1.71901	1.48593	1.16051	1.33254	1.34385	1.3497	1.49691	1.14597	3.04872	1.72399	1.66627	2.88066	1.9632	2.83427
383.125	1.54846	1.14533	1.40134	1.3538	1.39347	1.47169	1.27213	2.03409	1.0209	4.52198	1.91164	2.15134	4.83415	4.33352	1.14842	1.02337	5.77091	8.44138	1.09028	1.42492	1.05595	1.80114		345.248	1.016	1.76616	1.50151	1.14453	1.33388	1.32068	1.3579	1.43673	1.17088	3.11737	1.66407	1.69032	3.06764	1.96841	2.91115
383.75	1.46148	1.13424	1.40673	1.33063	1.37097	1.46234	1.26725	1.93607	1.04085	4.87164	1.92695	2.097	4.8869	4.38834	1.204	1.00728	5.51267	8.56506	1.07247	1.46541	1.06132	1.89874		345.811	1.03537	1.90275	1.4682	1.12712	1.33979	1.27939	1.30326	1.39099	1.19713	3.21496	1.65628	1.69431	3.24273	1.9699	3.11389
384.375	1.41317	1.10395	1.4127	1.32075	1.34888	1.46261	1.24539	1.82595	1.07501	5.09787	1.87715	2.02488	4.88991	4.58084	1.24099	1.01395	5.45583	8.60088	1.05859	1.47913	1.07818	2.2572		346.374	1.01856	1.91609	1.51911	1.14026	1.35397	1.2375	1.30157	1.37198	1.19101	3.31307	1.68015	1.69903	3.37049	2.03675	3.10234
385	1.4135	1.09118	1.42527	1.34953	1.32693	1.49316	1.24045	1.83527	1.11352	5.11505	1.86598	2.07252	5.08786	4.65927	1.25523	1.01548	5.81587	8.75559	1.05456	1.49547	1.12247	2.91101		346.937	0.999314	1.95783	1.48506	1.13901	1.37489	1.23132	1.30845	1.37645	1.18991	3.449	1.75292	1.72986	3.50737	2.04894	3.04049
385.625	1.47163	1.10482	1.46356	1.3496	1.31438	1.49707	1.24423	1.92447	1.16974	4.74748	1.89122	2.10608	5.70556	4.85001	1.24692	1.02244	5.87785	8.99437	1.0641	1.57264	1.12222	2.88189		347.501	1.03463	2.17126	1.478	1.14615	1.37726	1.25288	1.29766	1.38951	1.17308	3.56794	1.79088	1.73811	3.63749	2.0337	3.11141
386.25	1.48135	1.1167	1.5406	1.37416	1.31076	1.47424	1.25559	2.12695	1.27175	4.24954	1.89655	2.17276	6.57496	4.9252	1.21598	1.02847	5.59908	8.95018	1.07032	1.70642	1.10295	2.82832		348.064	1.06502	2.28342	1.52083	1.13663	1.36151	1.27031	1.34018	1.35706	1.18395	3.57378	1.85712	1.77393	3.71315	2.06526	3.23292
386.875	1.43621	1.11749	1.55936	1.4004	1.31128	1.46446	1.27318	2.52472	1.3055	3.93534	1.78481	2.25837	6.86614	4.80441	1.16984	1.02525	5.38513	8.6619	1.06607	1.92166	1.10171	2.74531		348.627	1.06101	2.33616	1.516	1.15443	1.41419	1.26511	1.35292	1.31981	1.16571	3.44334	1.9453	1.79907	3.55996	2.09706	3.21389
387.5	1.39413	1.10314	1.50581	1.40931	1.30607	1.5013	1.2703	2.52532	1.22382	3.7884	1.67404	2.28265	6.2068	4.70472	1.09245	1.0262	5.18069	8.23912	1.06163	2.05973	1.13013	2.70135		349.19	1.08026	2.39915	1.49011	1.1454	1.3809	1.26667	1.31385	1.29556	1.17926	3.35483	1.98087	1.77146	3.2417	2.0887	3.01843
388.125	1.3731	1.10895	1.4824	1.32401	1.26802	1.49508	1.27137	2.42262	1.12154	3.76805	1.6986	2.33615	5.62563	4.58198	1.04286	1.02945	5.21651	7.70824	1.05378	2.11922	1.1843	2.48599		349.753	1.08392	2.25625	1.4967	1.14623	1.36661	1.27232	1.31055	1.27516	1.20303	3.22647	2.00284	1.69478	2.93901	2.09808	2.80287
388.75	1.41368	1.11658	1.50744	1.35734	1.23856	1.50709	1.27026	2.49022	1.10091	3.73792	1.76216	2.54098	5.43739	4.55227	1.05134	1.03883	5.32963	7.18042	1.04649	1.94738	1.17234	2.08237		350.317	1.06919	2.13794	1.48829	1.11985	1.37292	1.262	1.3215	1.26506	1.21013	3.16596	1.9572	1.629	2.79622	2.14038	2.59315
389.375	1.42982	1.11354	1.51796	1.33303	1.21456	1.52451	1.29638	2.47928	1.13217	3.62331	1.80292	2.6656	5.3025	4.49991	1.06601	1.03894	5.34097	6.81315	1.03934	1.75842	1.12689	1.94484		350.88	1.05755	2.00142	1.52559	1.10765	1.37699	1.26021	1.35178	1.26665	1.1991	3.04975	1.89932	1.6096	2.86568	2.2375	2.47088
390	1.37772	1.10008	1.54285	1.32011	1.18038	1.52257	1.3097	2.47645	1.17683	3.53557	1.75438	2.72115	5.24094	4.52011	1.09496	1.0292	5.21086	6.70104	1.03868	1.61807	1.10642	1.97298		351.443	1.06604	1.88413	1.53378	1.14622	1.37565	1.24836	1.32647	1.2734	1.16456	2.98051	1.89023	1.58599	3.0585	2.28861	2.47372
390.625	1.37461	1.094	1.56584	1.31709	1.20547	1.44553	1.34691	2.54379	1.18945	3.58982	1.66364	2.77013	5.10759	4.55253	1.12463	1.02301	5.03991	6.8293	1.04487	1.46245	1.10083	2.09121		352.006	1.07765	1.77726	1.51155	1.14997	1.36446	1.24029	1.3514	1.26456	1.1704	2.95313	1.84024	1.58376	3.14141	2.33869	2.58712
391.25	1.38261	1.10331	1.59245	1.3003	1.2177	1.41798	1.37898	2.6401	1.16145	3.677	1.6117	2.61198	4.84992	4.50804	1.12242	1.03184	5.04115	7.15214	1.05565	1.34502	1.10111	2.05301		352.569	1.06173	1.74632	1.50775	1.14872	1.34708	1.25598	1.33717	1.2676	1.1578	2.94047	1.78375	1.61824	3.07164	2.47356	2.81623
391.875	1.40137	1.11069	1.60377	1.30067	1.22989	1.39548	1.35936	2.53346	1.13715	3.69173	1.60399	2.50848	4.66939	4.58731	1.11237	1.04994	5.31114	7.53576	1.06323	1.24044	1.11282	2.06539		353.133	1.05423	1.72683	1.57925	1.15689	1.3115	1.28216	1.33559	1.27219	1.17211	2.99066	1.71787	1.65298	2.98523	2.57962	3.08855
392.5	1.38527	1.10478	1.60195	1.30448	1.20845	1.40185	1.30516	2.49303	1.14436	3.61773	1.62646	2.57023	4.65911	5.1155	1.10585	1.05509	5.59094	7.97963	1.07158	1.18746	1.12266	2.11296		353.696	1.05696	1.67957	1.61897	1.14813	1.3197	1.28532	1.31789	1.27995	1.16536	3.12404	1.67707	1.65767	2.94487	2.64692	3.26109
393.125	1.383	1.10401	1.53088	1.33996	1.21276	1.42527	1.2653	2.53061	1.17044	3.47625	1.64375	2.6265	4.6543	5.44087	1.12576	1.041	5.98055	8.43322	1.08506	1.13009	1.12464	2.02899		354.259	1.04584	1.68942	1.59628	1.1547	1.30933	1.28517	1.27102	1.28684	1.15459	3.19315	1.67288	1.66469	2.96593	2.8218	3.37168
393.75	1.3882	1.12078	1.45213	1.32666	1.24833	1.42318	1.25031	2.67749	1.23018	3.29862	1.65981	2.45589	4.72702	5.45125	1.1369	1.03182	6.54081	8.69427	1.11324	1.12519	1.13851	2.06603		354.822	1.03115	1.67036	1.56748	1.15493	1.35116	1.28798	1.32735	1.2877	1.13183	3.22253	1.64171	1.68966	2.97906	2.93343	3.39647
394.375	1.37374	1.13578	1.4109	1.30765	1.2153	1.4336	1.25572	2.90749	1.29846	3.11277	1.67402	2.30831	5.04685	5.32523	1.10993	1.02601	6.40775	8.87725	1.13068	1.14535	1.11966	2.1335		355.385	1.02732	1.74318	1.552	1.15186	1.33622	1.25536	1.30975	1.29899	1.16002	3.2491	1.61506	1.71076	2.93484	2.87857	3.46635
395	1.30676	1.1131	1.42496	1.30796	1.19827	1.44531	1.25348	3.12341	1.31156	2.98263	1.71617	2.64263	5.33865	5.23052	1.07826	1.02567	6.016	9.24516	1.14335	1.17151	1.10337	2.07796		355.949	1.03847	1.81958	1.5284	1.14461	1.31881	1.22663	1.30016	1.30789	1.11951	3.23872	1.63348	1.73581	2.81349	2.76317	3.44426
395.625	1.3165	1.09132	1.45416	1.29328	1.20039	1.40873	1.25776	3.19757	1.28425	2.90372	1.76817	3.28894	5.41159	4.99997	1.07463	1.02019	6.19238	9.49358	1.18489	1.1954	1.05586	2.04948		356.512	1.02599	1.79798	1.50755	1.14125	1.32662	1.22868	1.33263	1.30764	1.12856	3.18575	1.63163	1.7429	2.69064	2.50362	3.30273
396.25	1.43287	1.10433	1.46964	1.3136	1.22761	1.40481	1.25684	3.05142	1.21848	2.82494	1.77644	3.76412	5.32038	4.6157	1.07881	1.01094	6.26146	9.13574	1.23998	1.20107	1.03174	2.13416		357.075	1.02256	1.7819	1.4798	1.17002	1.31063	1.22731	1.34535	1.31032	1.10693	3.21048	1.64823	1.74133	2.5823	2.31785	3.15439
396.875	1.42076	1.12879	1.47215	1.34682	1.29684	1.3911	1.26324	2.93206	1.15833	2.74688	1.77406	3.84529	5.05614	4.39373	1.0841	1.00103	5.9473	8.43992	1.26886	1.1659	1.04018	2.37468		357.638	1.01419	1.6794	1.47709	1.17655	1.30032	1.23078	1.34194	1.34375	1.12572	3.25026	1.64781	1.73197	2.53718	2.2596	3.05992
397.5	1.35334	1.14723	1.46091	1.36016	1.34615	1.39732	1.28471	2.88902	1.10056	2.8239	1.7866	3.56316	4.64095	4.24695	1.08106	1.00921	5.52687	7.92665	1.27861	1.14049	1.04919	2.55895		358.202	1.01577	1.62536	1.45536	1.18907	1.30345	1.23329	1.36856	1.37743	1.16779	3.39948	1.64391	1.75576	2.54636	2.26458	3.11613
398.125	1.33675	1.13417	1.4073	1.36463	1.42218	1.38025	1.32759	2.84549	1.08135	3.01479	1.85109	3.06322	4.32706	4.0838	1.06044	1.01241	5.38348	7.80886	1.27253	1.11784	1.0763	2.98297		358.765	1.0007	1.60961	1.45905	1.17947	1.32208	1.22939	1.33246	1.43897	1.18701	3.68978	1.66493	1.77385	2.59129	2.30273	3.34762
398.75	1.33037	1.10687	1.35535	1.34484	1.53031	1.38865	1.30702	2.76743	1.10074	3.05606	1.8649	2.62857	4.25278	3.99401	1.04858	1.00953	5.32601	8.08074	1.25873	1.10071	1.07631	3.51909		359.328	0.999683	1.6668	1.47429	1.15405	1.32908	1.23232	1.34535	1.41299	1.202	3.83619	1.7085	1.77641	2.59374	2.43726	3.8649
399.375	1.34261	1.0851	1.33743	1.39028	1.43278	1.4204	1.29279	2.75839	1.13626	2.93705	1.85662	2.63932	4.3497	3.87949	1.04372	1.02459	4.97202	8.37641	1.23117	1.08123	1.08419	3.1239		359.891	0.999209	1.63095	1.4638	1.15401	1.34494	1.20815	1.32094	1.35222	1.18152	3.5631	1.75224	1.7767	2.43413	2.52768	4.16121
400	1.37861	1.07325	1.34713	1.37766	1.32475	1.44425	1.29737	2.80561	1.15647	2.81126	1.86327	2.53513	4.59218	3.75349	1.03055	1.02152	4.87416	8.49511	1.167	1.06208	1.09322	2.65061		360.454	0.999127	1.60811	1.44612	1.13486	1.32908	1.19579	1.3431	1.31405	1.2055	3.24946	1.70759	1.80126	2.29261	2.526	4.22391
400.625	1.42645	1.05725	1.39096	1.35018	1.25804	1.47064	1.29873	3.07588	1.13387	2.7684	2.00618	2.41606	4.93845	3.76924	1.02345	1.00784	4.82012	8.34115	1.12477	1.05169	1.08593	2.47622		361.018	1.02329	1.66476	1.48874	1.14626	1.33827	1.19051	1.36413	1.30464	1.20242	3.15719	1.70271	1.82249	2.23001	2.54473	4.19044
401.25	1.43491	1.05304	1.44576	1.30192	1.21961	1.44327	1.32163	3.5622	1.08659	2.75142	2.15775	2.26284	5.27513	3.84831	1.02112	1.0103	4.54642	8.1093	1.11173	1.05214	1.08798	2.50688		361.581	1.04536	1.71235	1.49738	1.15722	1.34983	1.21898	1.34276	1.29951	1.17589	3.08165	1.80867	1.84364	2.24958	2.70038	3.93473
401.875	1.38969	1.05692	1.54171	1.32148	1.20194	1.39533	1.32825	3.98481	1.05426	2.75024	2.16242	2.02533	5.69411	3.88218	1.02986	1.02823	4.49711	8.0432	1.10664	1.07002	1.08802	2.93461		362.144	1.06071	1.69452	1.49906	1.17875	1.34118	1.23529	1.35168	1.30574	1.17836	3.02551	1.93299	1.85426	2.24812	2.77025	3.57536
402.5	1.32041	1.06305	1.65825	1.38634	1.17848	1.39465	1.34319	4.40587	1.05149	2.88208	2.10478	1.96369	6.28419	3.8045	1.0491	1.04929	4.57274	8.05514	1.10521	1.06351	1.08045	3.37787		362.707	1.10814	1.7277	1.48639	1.15088	1.33945	1.23243	1.35345	1.31198	1.19392	3.09435	2.15893	1.89014	2.21116	2.74652	3.36756
403.125	1.32864	1.06535	1.74003	1.40077	1.19632	1.44385	1.34821	4.21388	1.0415	3.25708	2.01393	2.02218	6.84918	3.81302	1.05006	1.06077	4.36316	7.95735	1.10216	1.07407	1.09987	3.14217		363.27	1.12655	1.68675	1.48743	1.14359	1.31429	1.24369	1.37398	1.30267	1.19456	3.05296	2.31503	1.90752	2.09539	2.81574	3.33383
403.75	1.35429	1.0628	1.66496	1.3963	1.22015	1.50551	1.32919	3.58989	1.02693	3.48345	1.96325	1.98833	6.75977	3.78495	1.05385	1.05601	4.25367	7.92186	1.09718	1.0796	1.10857	2.91306		363.834	1.08129	1.66376	1.52015	1.14213	1.3225	1.26663	1.36019	1.28577	1.19697	3.03186	2.36917	1.90815	1.93968	3.00175	3.47688
404.375	1.39362	1.07549	1.57541	1.43863	1.19387	1.52281	1.3178	3.34968	1.03348	3.38266	1.94569	1.93486	6.28404	3.62721	1.04248	1.0552	4.22857	8.23923	1.10317	1.06715	1.09898	3.05302		364.397	1.04184	1.66855	1.48175	1.14426	1.33952	1.24365	1.34983	1.28355	1.20133	3.02237	2.13405	1.87892	1.81938	3.38803	3.69797
405	1.41982	1.09866	1.49248	1.45162	1.17261	1.50057	1.34284	3.27695	1.03346	3.13754	1.88751	1.81683	5.88116	3.52257	0.990876	1.04741	4.07612	8.67609	1.11172	1.04763	1.10978	3.31424		364.96	1.04618	1.68902	1.51082	1.16456	1.34369	1.23367	1.32087	1.27285	1.21056	2.9769	1.94767	1.83465	1.74569	3.59219	3.77621
405.625	1.43973	1.11226	1.4638	1.53701	1.19817	1.47561	1.37856	3.21451	1.02794	2.99478	1.81469	1.76546	5.73829	3.50881	0.953064	1.04548	3.9075	8.7996	1.10965	1.02608	1.07794	2.87976		365.523	1.05878	1.70433	1.47473	1.15851	1.35352	1.23825	1.29098	1.28225	1.17108	2.97098	1.94357	1.79197	1.70403	3.34245	3.78929
406.25	1.4685	1.09748	1.48581	1.5285	1.28261	1.49758	1.45333	3.21982	1.0214	2.98989	1.82526	1.84456	5.72438	3.69623	0.935705	1.05177	3.76612	8.77553	1.10706	1.02142	1.05692	2.53845		366.086	1.05244	1.73316	1.4471	1.15552	1.33414	1.23931	1.31457	1.29426	1.16752	2.97718	2.02113	1.7672	1.70085	3.09245	3.83009
406.875	1.4809	1.09664	1.541	1.46095	1.30641	1.48489	1.55085	3.38901	1.01694	3.03829	1.86364	1.75096	5.739	3.90723	0.936053	1.04919	3.75671	8.7453	1.10132	1.03193	1.08519	2.49751		366.65	1.05547	1.74715	1.38908	1.15295	1.33783	1.24915	1.31255	1.28918	1.20788	3.19884	2.09628	1.81873	1.71447	2.98754	4.07044
407.5	1.44727	1.09882	1.5793	1.42473	1.24466	1.47655	1.59594	3.82909	1.02158	3.08748	1.9115	1.72353	5.78977	4.09163	0.93769	1.04212	3.76992	8.69844	1.08354	1.03776	1.07978	2.52598		367.213	1.05994	1.76205	1.38814	1.16045	1.31928	1.25485	1.32985	1.31003	1.1931	3.6368	2.11676	1.92289	1.73095	3.10039	4.43744
408.125	1.46945	1.08497	1.62194	1.36639	1.23105	1.49431	1.69174	4.27525	1.03243	3.18457	1.89706	1.76125	5.92379	4.16721	0.957764	1.02721	4.15873	8.56051	1.06417	1.07315	1.04229	2.57913		367.776	1.07224	1.73237	1.40246	1.15036	1.33436	1.26909	1.33132	1.31655	1.22516	3.58621	2.16827	2.00798	1.75217	3.18013	4.62522
408.75	1.46296	1.08403	1.61659	1.32086	1.22445	1.48553	1.73661	4.557	1.05123	3.23406	1.84415	1.82797	6.12151	4.3332	1.01528	1.02403	4.32233	8.1456	1.04863	1.0918	1.02291	2.75614		368.339	1.07329	1.71962	1.38343	1.16312	1.35945	1.2559	1.31751	1.32599	1.18792	3.06192	2.35947	2.04739	1.76368	3.19971	4.96943
409.375	1.49512	1.09381	1.59552	1.30251	1.21216	1.42848	1.66517	4.99703	1.05099	3.21281	1.83192	1.81796	6.15441	4.51974	1.09522	1.0338	4.20846	7.9724	1.04205	1.10937	1.03972	3.07275		368.903	1.08381	1.77317	1.39015	1.1339	1.36453	1.24885	1.30752	1.31339	1.19111	2.74233	2.76553	2.06209	1.76003	3.35816	5.45233
410	1.56348	1.09726	1.57379	1.31973	1.26678	1.41073	1.59779	5.47458	1.03181	3.22971	1.81317	1.84501	5.75423	4.85419	1.08194	1.03363	4.44065	8.01778	1.04513	1.10652	1.04641	3.33976		369.466	1.0765	1.76255	1.41258	1.14261	1.34966	1.23913	1.31381	1.30221	1.17532	2.69625	3.14799	2.01362	1.7843	3.4722	5.88
410.625	1.56507	1.10235	1.58376	1.33818	1.39471	1.41513	1.56257	5.87404	1.0329	3.36204	1.82736	1.95461	5.3644	5.15024	1.01772	1.025	4.88451	7.76677	1.03155	1.10336	1.05618	3.18743		370.029	1.10445	1.77303	1.43042	1.14027	1.33324	1.21797	1.29499	1.32172	1.18064	2.75559	2.92138	1.95242	1.80445	3.55323	6.07242
411.25	1.61161	1.10519	1.56206	1.34695	1.51645	1.42791	1.54242	6.0538	1.04725	3.52672	1.96758	2.20826	5.16453	5.3155	1.01003	1.01715	5.18119	7.41725	1.01776	1.07329	1.09093	3.20628		370.592	1.15159	1.73609	1.46417	1.14932	1.35303	1.21718	1.33189	1.33523	1.16228	2.8004	2.51007	1.90803	1.81251	3.71944	5.94268
411.875	1.74379	1.10882	1.5229	1.4074	1.56188	1.42081	1.508	5.70103	1.04613	3.42071	2.16063	2.14248	4.79847	5.69319	0.998488	1.03052	5.18867	7.42813	1.00728	1.04486	1.12074	3.0846		371.155	1.11681	1.655	1.43153	1.15126	1.36625	1.22678	1.33246	1.33147	1.20367	2.89652	2.48724	1.91035	1.79012	4.12138	5.84433
412.5	1.75922	1.11764	1.50616	1.4068	1.60972	1.4315	1.45035	5.14991	1.04642	3.1701	2.35745	2.09476	4.62274	6.28471	0.993207	1.02221	5.18763	7.89303	0.995442	1.04003	1.14842	2.88944		371.719	1.10038	1.63254	1.41952	1.13873	1.36717	1.22577	1.31049	1.31967	1.14838	2.93036	2.64118	1.94724	1.77092	4.78015	5.84213
413.125	1.662	1.12223	1.48974	1.36214	1.60979	1.52732	1.45867	4.82871	1.05586	3.01986	2.49335	2.07815	4.66918	6.65963	0.988862	1.00348	5.2155	8.54539	0.989717	1.03613	1.19128	2.41724		372.282	1.09734	1.63714	1.4269	1.1557	1.37793	1.21159	1.30462	1.29953	1.1946	2.90714	2.85697	2.01193	1.74911	4.46407	5.63402
413.75	1.71113	1.11803	1.51798	1.32178	1.59869	1.77514	1.46737	5.18011	1.07047	3.0627	2.4599	2.08481	4.80038	6.92758	1.00757	0.999664	5.21962	8.84174	0.987079	1.02972	1.23978	1.94597		372.845	1.11908	1.63875	1.42766	1.15901	1.41303	1.2278	1.3434	1.28936	1.23052	2.85185	2.92256	2.09063	1.69531	4.06287	5.39985
414.375	1.78987	1.13105	1.55241	1.31081	1.64349	1.8828	1.42887	5.60386	1.07802	3.13618	2.29416	2.10751	4.92451	6.35095	1.11066	1.00152	5.30509	8.72509	0.988403	1.03875	1.25353	1.78696		373.408	1.09195	1.66538	1.43846	1.14232	1.40665	1.22294	1.31264	1.29753	1.21346	2.74678	2.72648	2.09946	1.65377	3.77709	5.57072
415	1.76869	1.13019	1.61491	1.32637	1.61298	2.00348	1.41933	5.09364	1.07428	3.18353	2.1588	2.05183	4.86104	5.66239	1.15981	0.998419	5.47061	8.5699	0.988823	1.02816	1.24759	1.74729		373.971	1.0717	1.67402	1.44708	1.17139	1.37918	1.22241	1.31366	1.33026	1.24346	2.62544	2.73462	2.08421	1.61682	3.6173	6.08138
415.625	1.66261	1.13185	1.62048	1.40937	1.53283	2.057	1.47416	4.80094	1.07655	3.31367	2.06233	2.08442	4.61554	5.24201	1.08208	1.00425	5.3279	8.27387	0.988301	1.03203	1.25477	1.72904		374.535	1.06533	1.71003	1.45998	1.13179	1.39714	1.22007	1.31078	1.39603	1.17964	2.50647	2.78849	2.08554	1.58242	3.6514	6.64331
416.25	1.57475	1.16851	1.60672	1.48447	1.41292	1.98126	1.54505	4.92447	1.06919	3.50363	1.93724	2.33466	4.45174	5.00352	1.00523	1.02032	5.30019	7.8552	0.990853	1.05124	1.24964	1.7322		375.098	1.08107	1.79179	1.44349	1.13721	1.33805	1.22303	1.29488	1.43019	1.17624	2.46155	2.81689	2.089	1.58774	3.78279	7.04107
416.875	1.48829	1.20867	1.67205	1.50959	1.37061	1.78106	1.49536	5.21253	1.07269	3.58091	1.85495	2.78962	4.44614	5.11176	0.974661	1.01815	5.09061	7.64248	0.998314	1.05893	1.24626	1.64819		375.661	1.08319	1.8463	1.47845	1.14449	1.33496	1.24121	1.26816	1.39998	1.15157	2.44471	2.79964	2.08308	1.60695	3.92396	7.29807
417.5	1.47095	1.22549	1.8305	1.44375	1.34302	1.67871	1.46277	5.72685	1.082	3.47384	1.84018	3.35889	4.53397	5.26047	0.985627	1.00964	5.04215	7.7864	1.006	1.07537	1.25094	1.62095		376.224	1.07548	1.89048	1.43399	1.14509	1.32543	1.24541	1.28692	1.42957	1.19764	2.50096	2.95148	2.05516	1.62819	4.0272	6.89835
418.125	1.4339	1.20682	1.92216	1.43425	1.33677	1.59334	1.41355	5.18976	1.08871	3.32125	1.91742	3.54955	4.53103	5.42329	1.02462	1.01877	4.90578	8.27828	1.00314	1.08228	1.24827	1.68546		376.787	1.07546	1.96645	1.40919	1.14707	1.33635	1.23798	1.30235	1.51878	1.22658	2.58189	3.09392	1.99756	1.66048	4.0247	6.08168
418.75	1.39375	1.16267	2.02979	1.39366	1.4121	1.53057	1.36964	4.61784	1.11035	3.26873	1.98013	3.12967	4.42423	5.58731	1.05531	1.01971	4.38573	8.84395	0.995417	1.09423	1.248	1.74323		377.351	1.08614	1.84621	1.40732	1.16864	1.30174	1.22121	1.29751	1.62815	1.17729	2.5359	2.96337	1.95302	1.69676	3.90305	5.44005
419.375	1.30448	1.13218	2.13047	1.36551	1.4378	1.58204	1.36751	3.8152	1.12611	3.24828	2.18497	3.10625	4.33583	5.39473	1.05281	1.01693	3.9149	9.3161	0.996092	1.09199	1.28841	1.71996		377.914	1.15994	1.78409	1.41695	1.17859	1.3126	1.21896	1.33332	1.73092	1.18734	2.50442	2.90369	1.98993	1.74461	3.74959	5.19144
420	1.2466	1.11782	2.11448	1.37483	1.39227	1.78553	1.37993	3.39502	1.15767	3.13877	2.38031	3.34723	4.17924	4.83036	1.02427	1.01435	3.60109	9.89495	1.00219	1.07424	1.31185	1.73719		378.477	1.16938	1.78363	1.41452	1.17271	1.32062	1.20867	1.30616	1.69206	1.20326	2.5044	2.91274	2.03497	1.75051	3.81235	4.86726
420.625	1.22834	1.10833	2.01097	1.42576	1.3346	2.12609	1.40794	3.25946	1.193	2.98132	2.5131	3.33595	3.85996	4.30306	0.991274	1.00611	3.36652	10.6118	1.00544	1.07387	1.26883	1.66296		379.04	1.15023	1.80999	1.43864	1.15537	1.34565	1.21469	1.29754	1.55912	1.19744	2.48066	2.81749	2.06369	1.71643	3.9992	4.7338
421.25	1.20835	1.10902	1.94638	1.44436	1.31444	2.58349	1.39749	3.22891	1.23256	2.93179	2.74157	3.09738	3.48084	4.16217	0.96542	0.997644	3.12732	10.8725	1.00805	1.07707	1.23253	1.56426		379.604	1.1527	1.77589	1.41771	1.18997	1.36896	1.22241	1.3623	1.4784	1.19803	2.48136	2.73187	2.03957	1.6919	4.0536	4.63477
421.875	1.21342	1.11576	1.89074	1.46008	1.38919	3.05978	1.34294	3.20829	1.27537	3.05623	2.86587	2.96838	3.26658	4.28553	0.963007	1.00526	2.95818	10.8526	1.01263	1.08636	1.20588	1.69926		380.167	1.13486	1.74582	1.37785	1.18422	1.37878	1.21498	1.3586	1.4414	1.18691	2.47484	2.6996	1.97567	1.69606	3.99043	4.28834
422.5	1.22527	1.1214	1.78539	1.45318	1.43652	3.106	1.34606	3.18932	1.30719	3.23459	2.87056	2.8684	3.26094	4.32563	0.980271	1.01116	2.74797	10.9332	1.01111	1.08256	1.19342	1.84365		380.73	1.10545	1.7132	1.35944	1.19278	1.35699	1.20909	1.32634	1.43341	1.19318	2.38183	2.68109	1.96302	1.6577	3.8326	4.04749
423.125	1.23973	1.11709	1.73371	1.48781	1.4059	2.63979	1.33539	3.17986	1.33588	3.38948	2.93212	2.86887	3.1994	4.70308	0.995753	1.00873	2.65974	10.8009	1.00463	1.09996	1.20405	1.82206		381.293	1.11599	1.72258	1.37216	1.23027	1.35378	1.19774	1.31644	1.41313	1.19176	2.31277	2.67277	1.98726	1.63444	3.62888	4.02461
423.75	1.25511	1.11276	1.71553	1.52784	1.35033	2.16411	1.30088	3.13224	1.32473	3.5831	2.99548	2.82978	3.05116	5.15283	0.992343	1.00291	2.69645	10.4051	0.998997	1.13127	1.20746	1.78623		381.856	1.14207	1.75917	1.40985	1.20087	1.35538	1.19855	1.30401	1.32631	1.18899	2.29605	2.61995	2.01282	1.6263	3.57824	4.27577
424.375	1.28449	1.12323	1.71294	1.5631	1.37006	1.92467	1.33389	3.23987	1.25424	3.65971	2.88601	2.58731	3.07031	5.37321	0.985425	1.00273	2.67791	9.82255	0.99157	1.11312	1.21781	1.79755		382.42	1.11316	1.77492	1.40875	1.17384	1.37218	1.21853	1.31373	1.28032	1.20743	2.27749	2.45389	2.01156	1.60735	3.60788	4.7424
425	1.34806	1.12809	1.68083	1.58232	1.40354	1.96206	1.42603	3.51824	1.17545	3.58704	2.70543	2.33214	3.25576	5.40862	1.0116	1.00262	2.94493	9.13446	0.988039	1.07135	1.21358	1.88166		382.983	1.0998	1.76904	1.39804	1.16016	1.36824	1.2153	1.30712	1.24494	1.23211	2.30369	2.29874	2.0289	1.63766	3.65316	5.01668
425.625	1.43632	1.13397	1.59184	1.67423	1.34605	1.96713	1.42338	3.71045	1.16224	3.44887	2.63423	2.35653	3.68038	5.3323	1.06635	0.999429	3.14948	8.53059	0.993389	1.05015	1.17134	2.01164		383.546	1.06273	1.79401	1.37882	1.14861	1.39426	1.20697	1.35952	1.23569	1.22723	2.33787	2.25109	2.07468	1.75348	3.80899	4.46086
426.25	1.45396	1.13827	1.5431	1.94405	1.26419	1.98824	1.30708	3.63056	1.17675	3.17073	2.64576	2.27589	4.40565	4.68019	1.17466	0.998848	3.0099	8.12388	1.00791	1.04358	1.16508	2.10783		384.109	1.06026	1.79855	1.3895	1.17879	1.40564	1.19013	1.33635	1.2455	1.20303	2.30605	2.27995	2.13575	1.97314	4.04762	4.07975
426.875	1.44356	1.14065	1.54156	2.11998	1.22016	2.01013	1.2341	3.60409	1.19628	2.84456	2.57972	2.22125	5.16358	4.19431	1.3253	0.992728	2.91137	7.66324	1.00513	1.04846	1.17374	2.36926		384.672	1.05928	1.74423	1.4127	1.17757	1.40368	1.18246	1.30056	1.23855	1.19207	2.34502	2.29596	2.18817	2.31463	4.51294	3.88205
427.5	1.43436	1.11948	1.56938	2.14148	1.23763	2.10044	1.21715	3.86999	1.26413	2.55228	2.4525	2.19255	5.46493	4.09974	1.52824	0.986195	2.81979	7.15339	0.992664	1.0568	1.18206	2.77119		385.236	1.06184	1.74068	1.3831	1.20008	1.40564	1.19352	1.32836	1.21562	1.18299	2.43078	2.24976	2.21497	2.57326	4.72787	3.8004
428.125	1.39861	1.09363	1.63506	2.07117	1.27099	2.12189	1.237	4.31798	1.35108	2.43687	2.2819	2.19882	5.40516	4.16611	1.83869	0.992577	3.49454	6.67951	0.992917	1.06497	1.20478	2.75641		385.799	1.07482	1.76563	1.36672	1.18853	1.38453	1.20932	1.32844	1.20699	1.17417	2.50598	2.25564	2.24164	2.61854	4.48058	3.91209
428.75	1.36263	1.10296	1.6182	1.96007	1.25119	2.05385	1.2708	4.00798	1.39656	2.47248	2.17326	2.19647	5.1692	4.02906	2.0095	1.00611	3.52178	6.19021	0.998795	1.05386	1.2509	2.656		386.362	1.04504	1.74454	1.42341	1.18051	1.36073	1.2145	1.33749	1.22811	1.21023	2.49915	2.27518	2.24652	2.54746	4.09671	4.01703
429.375	1.36199	1.12506	1.59729	1.76302	1.24497	2.04728	1.30543	3.27975	1.4072	2.4766	2.0791	2.15743	4.63942	3.91729	1.83609	0.996884	3.66781	5.74563	1.00769	1.0763	1.28915	2.94979		386.925	1.05049	1.74076	1.43005	1.16898	1.3739	1.23665	1.2985	1.25856	1.22581	2.3557	2.23745	2.22435	2.48451	3.81467	4.07085
430	1.35766	1.1394	1.58995	1.75113	1.23654	2.07089	1.35961	2.91874	1.37868	2.43665	2.08939	2.21544	4.01863	3.56743	1.62902	1.00188	3.70071	5.52011	1.00902	1.16698	1.3068	3.22112		387.488	1.06791	1.74258	1.45911	1.18482	1.38876	1.26993	1.32733	1.25781	1.21405	2.33975	2.21283	2.1926	2.47863	3.70138	4.25286
430.625	1.33047	1.1279	1.62867	1.94677	1.2691	2.04419	1.35546	2.69495	1.31577	2.39976	2.43084	2.28403	3.57148	3.51599	1.55761	0.99436	3.05781	5.58216	1.0083	1.22919	1.33874	2.98552		388.052	1.09046	1.79493	1.41579	1.17073	1.36298	1.3301	1.33501	1.25352	1.2237	2.33707	2.20215	2.16335	2.34681	3.43404	4.50606
431.25	1.30545	1.10588	1.68619	2.06797	1.30492	2.04917	1.32411	2.66586	1.2683	2.37198	2.822	2.68767	3.44422	3.567	1.45579	0.976446	2.89147	5.78661	1.01438	1.26957	1.31197	3.01275		388.615	1.10973	1.77795	1.39025	1.17059	1.34388	1.35927	1.37064	1.24489	1.21566	2.24829	2.1836	2.16862	2.08878	3.3143	4.46912
431.875	1.31928	1.09683	1.69959	1.97239	1.35673	2.07568	1.27371	2.77501	1.23552	2.35172	2.85233	2.45116	3.61684	3.59468	1.36537	0.972739	2.79309	5.99938	1.01966	1.24253	1.28803	3.54782		389.178	1.12706	1.75004	1.39816	1.17044	1.35196	1.4023	1.34203	1.23033	1.19631	2.17355	2.22101	2.24567	1.94418	3.31548	4.35391
432.5	1.33077	1.09442	1.742	1.78938	1.40428	1.90539	1.24046	3.01094	1.23801	2.36331	2.76689	2.04916	3.82973	3.64544	1.36953	0.970133	2.93525	6.24512	1.02195	1.23201	1.26592	3.34903		389.741	1.08048	1.74555	1.40428	1.17286	1.3557	1.4449	1.31499	1.24423	1.20176	2.15503	2.28603	2.30818	1.90779	3.24399	4.26939
433.125	1.2931	1.10915	1.79767	1.84225	1.44583	1.79088	1.21799	3.11506	1.2764	2.3567	2.91436	1.85314	3.95735	3.92231	1.34871	0.976618	2.90587	6.36575	1.03393	1.26235	1.29837	2.63197		390.305	1.07721	1.7284	1.38454	1.19274	1.37853	1.45757	1.26911	1.24251	1.2267	2.22685	2.31391	2.34711	1.9337	3.20244	4.06417
433.75	1.24636	1.13052	1.77603	1.94329	1.35287	1.80466	1.21765	3.26983	1.3116	2.27536	2.74922	1.81475	3.89419	4.04876	1.31069	0.981568	3.07163	6.30723	1.05687	1.28636	1.30644	2.2561		390.868	1.07868	1.77704	1.37912	1.19994	1.38072	1.43699	1.24369	1.23887	1.23844	2.30603	2.25179	2.39677	1.96073	3.20209	3.8962
434.375	1.22171	1.14207	1.71563	1.83734	1.29117	1.81488	1.24368	3.30252	1.30157	2.1912	2.41424	1.85128	3.82032	3.99541	1.27187	0.99667	3.30339	6.22098	1.08182	1.31811	1.27721	2.12593		391.431	1.05482	1.84668	1.37288	1.1868	1.36867	1.38962	1.29617	1.25028	1.21648	2.25587	2.23821	2.41443	1.99812	3.15945	3.76985
435	1.23862	1.16359	1.67448	1.83774	1.23959	1.82003	1.29134	3.30542	1.25663	2.13717	2.11446	1.86153	3.80224	3.90423	1.27521	0.997714	3.22508	6.23482	1.10146	1.31945	1.28463	2.07789		391.994	1.02366	1.88597	1.36941	1.16854	1.34156	1.39635	1.28734	1.28032	1.17887	2.25255	2.21312	2.40843	2.07802	3.26802	3.86741
435.625	1.24221	1.16792	1.7243	1.76175	1.22829	1.78999	1.33918	3.32517	1.24286	2.20779	1.9568	1.9161	3.73755	3.8269	1.27121	0.996248	3.25887	6.39919	1.11465	1.2336	1.31156	2.18011		392.557	1.02002	1.87668	1.35967	1.19106	1.37603	1.43965	1.35416	1.28554	1.15992	2.248	2.2043	2.38679	2.17881	3.31758	4.02899
436.25	1.2443	1.16721	1.7739	1.83798	1.2611	1.80241	1.36047	3.43452	1.29127	2.35293	1.99485	2.08964	3.78374	3.74163	1.19511	0.995038	3.15083	6.56454	1.11027	1.17938	1.30707	2.66364		393.121	1.03664	1.84419	1.37649	1.19441	1.3523	1.48083	1.32363	1.28457	1.17301	2.25278	2.32338	2.41735	2.16614	3.34631	4.12695
436.875	1.26686	1.23508	1.78481	2.06688	1.27918	1.84198	1.36171	3.72356	1.33863	2.54537	2.09881	2.33678	3.84918	3.44778	1.1365	0.991982	3.18476	6.76931	1.07235	1.196	1.28909	2.83628		393.684	1.03042	1.80405	1.39354	1.19622	1.34621	1.48445	1.32245	1.2872	1.22442	2.22558	2.45052	2.48642	2.02014	3.41961	4.30173
437.5	1.30013	1.27471	1.80476	2.10914	1.26196	1.93787	1.38844	4.21101	1.3854	2.79104	2.17296	2.79303	3.82911	3.32593	1.12719	0.99306	3.48531	6.93152	1.04374	1.18446	1.26263	2.77943		394.247	1.04488	1.78232	1.37663	1.18665	1.33371	1.47954	1.34644	1.28772	1.20071	2.20153	2.53888	2.53599	1.92516	3.44095	4.61437
438.125	1.31673	1.24226	1.84799	1.99929	1.24791	2.00306	1.46717	4.30704	1.41322	2.95419	2.17592	2.92353	3.85336	3.20427	1.13899	1.00035	3.611	6.6776	1.02432	1.1653	1.26092	2.79853		394.81	1.06902	1.7771	1.35783	1.2046	1.34355	1.48059	1.33	1.28427	1.1916	2.20553	2.60015	2.57134	1.88171	3.46181	4.77461
438.75	1.31779	1.21283	1.89737	1.96647	1.2649	2.02188	1.55309	4.05897	1.34986	3.00853	1.98201	2.68017	4.02982	3.1793	1.15078	0.999705	3.91576	6.06866	1.01704	1.13468	1.22774	2.72435		395.373	1.06075	1.82011	1.32354	1.22095	1.32136	1.50481	1.31495	1.27037	1.19841	2.19542	2.57719	2.57988	1.87873	3.40532	4.67868
439.375	1.35998	1.20777	1.98972	2.05123	1.22617	1.90612	1.59395	4.13416	1.26232	2.8158	1.84652	2.74276	4.33183	3.05775	1.18638	0.994893	4.15184	5.63356	1.01107	1.11688	1.21606	3.00801		395.937	1.09564	1.76576	1.32397	1.207	1.327	1.52608	1.34011	1.25318	1.19111	2.20136	2.56771	2.62184	1.87019	3.35302	4.70505
440	1.4229	1.20829	2.15477	2.1314	1.21812	1.78579	1.59311	3.97954	1.23761	2.45293	1.88435	2.78141	4.452	2.89334	1.26387	1.01474	4.6212	5.60451	1.00474	1.10917	1.19257	3.01409		396.5	1.0948	1.69292	1.28901	1.19009	1.31452	1.54383	1.32611	1.26633	1.20968	2.26531	2.54962	2.59391	1.65206	3.32517	4.97163
440.625	1.37189	1.23919	2.16961	2.28714	1.22552	1.74642	1.62516	3.49491	1.25537	2.26999	1.92665	2.54744	4.31219	2.7324	1.34061	1.02572	4.51023	6.03761	1.00735	1.16982	1.13884	2.88115		397.063	1.10241	1.68642	1.30493	1.16929	1.30939	1.59271	1.30063	1.28209	1.24446	2.29439	2.51951	2.53606	1.5085	3.32572	4.73929
441.25	1.32608	1.28627	2.09887	2.66415	1.22891	1.75828	1.7282	3.63121	1.28381	2.26285	1.91964	2.10388	4.29132	2.67768	1.34355	1.04338	3.84402	6.8278	1.01502	1.34935	1.13799	2.70751		397.626	1.10438	1.6806	1.29023	1.19272	1.3349	1.63048	1.27222	1.29497	1.23842	2.31048	2.50684	2.46727	1.46812	3.38896	4.09172
441.875	1.29921	1.35016	2.23101	2.94853	1.24564	1.75914	1.76871	3.75205	1.30273	2.28335	1.97347	1.81082	4.51488	2.63052	1.28675	1.06017	3.31743	7.56953	1.01084	1.50517	1.1406	2.57729		398.189	1.09197	1.70482	1.29328	1.17742	1.33545	1.62192	1.30948	1.29465	1.24364	2.4134	2.52403	2.46668	1.44678	3.41378	3.86584
442.5	1.29887	1.42707	2.36563	2.6024	1.25057	1.71651	1.7263	3.78536	1.2955	2.20197	2.12082	1.69431	4.68946	2.57635	1.23661	1.05656	3.00811	7.82672	1.00094	1.53316	1.13126	2.40804		398.753	1.1013	1.72604	1.2659	1.21822	1.33359	1.56418	1.31873	1.27351	1.19876	2.47594	2.49132	2.51115	1.44166	3.29013	3.88803
443.125	1.26965	1.48603	2.34063	2.38027	1.24512	1.666	1.65961	3.66162	1.25118	2.16031	2.16752	1.69184	4.76237	2.60043	1.23074	1.05517	2.67434	7.59432	1.00025	1.36865	1.1045	2.43488		399.316	1.0908	1.74519	1.28399	1.23522	1.31405	1.51831	1.30071	1.25725	1.18159	2.48094	2.47921	2.58721	1.44745	3.26315	3.82778
443.75	1.22882	1.5169	2.35381	2.20521	1.29465	1.63359	1.6744	3.30353	1.22017	2.25645	2.0396	1.73498	4.86282	2.68615	1.27736	1.03663	2.5229	7.473	1.00132	1.14567	1.07973	2.42987		399.879	1.06583	1.70185	1.27959	1.23256	1.3319	1.48659	1.32224	1.23955	1.20667	2.45722	2.44271	2.67838	1.44359	3.2455	3.83601
444.375	1.22672	1.46779	2.36483	2.19333	1.30967	1.638	1.72464	3.07954	1.21349	2.29428	1.89354	1.90757	4.95574	2.76551	1.33668	1.00271	2.63727	7.61884	1.00671	1.06528	1.06436	2.37241		400.442	1.05798	1.71824	1.29942	1.26971	1.32848	1.44051	1.32262	1.24358	1.23422	2.4139	2.42631	2.70005	1.42244	3.13579	3.83622
445	1.24628	1.36824	2.2598	2.20492	1.29984	1.63456	1.74666	2.96553	1.1801	2.18171	1.83269	1.9222	4.72126	2.27996	1.34304	0.990896	2.79205	7.55573	1.01892	1.05114	1.06083	2.23158		401.005	1.08423	1.73873	1.31921	1.24804	1.34207	1.38589	1.30622	1.24832	1.24138	2.35764	2.42234	2.6814	1.41133	3.04682	3.62906
445.625	1.28394	1.25139	2.10605	2.24382	1.29875	1.71829	1.63817	3.15364	1.15984	2.02726	1.83485	1.82117	4.2934	2.25119	1.36482	0.990627	2.82186	7.10726	1.03845	1.06289	1.08433	2.11677		401.569	1.10228	1.74914	1.30572	1.25321	1.37073	1.38075	1.27584	1.25486	1.23671	2.38118	2.33478	2.71938	1.39699	3.087	3.42986
446.25	1.28806	1.16734	1.93976	2.40941	1.29825	1.78634	1.54106	3.48966	1.18114	1.91122	1.87987	1.7023	4.04534	2.3877	1.40409	0.983027	2.92431	6.86094	1.07543	1.06488	1.09762	2.09326		402.132	1.08804	1.77469	1.2918	1.23195	1.37936	1.39315	1.24823	1.2404	1.2808	2.3818	2.23644	2.76169	1.39664	3.17349	3.42687
446.875	1.28301	1.13515	1.83454	2.51041	1.29007	1.83139	1.48007	3.41687	1.19635	1.82507	1.90155	1.63944	3.98736	2.40873	1.45808	0.995404	3.31415	7.09927	1.11618	1.04494	1.09639	2.06131		402.695	1.06098	1.71953	1.30366	1.24194	1.38958	1.4487	1.28608	1.22797	1.29435	2.34789	2.23737	2.82419	1.42093	3.22355	3.52042
447.5	1.27899	1.13766	1.82587	2.42841	1.32115	1.90526	1.44014	3.06313	1.18575	1.72197	1.88842	1.67806	3.9029	2.34466	1.39614	1.00312	3.93944	7.2646	1.14225	1.06575	1.06198	2.05914		403.258	1.05615	1.67373	1.31004	1.21473	1.40164	1.51694	1.32142	1.21848	1.28199	2.37193	2.26954	2.83676	1.43743	3.31709	3.60789
448.125	1.27983	1.14882	1.82454	2.19382	1.3017	2.04469	1.46443	2.75274	1.18052	1.60188	1.86284	1.80473	3.65691	2.37453	1.26531	1.01282	3.98911	6.83839	1.14981	1.09344	1.06598	2.11487		403.822	1.04452	1.67007	1.30101	1.22526	1.39781	1.62917	1.27825	1.22398	1.25579	2.32212	2.22241	2.82509	1.41809	3.49977	3.86002
448.75	1.33536	1.14315	1.80941	2.10768	1.29972	2.15966	1.57525	2.64814	1.18155	1.50563	1.88886	1.86637	3.46274	2.4036	1.13937	1.00827	3.91701	6.19032	1.1305	1.09556	1.08414	2.14951		404.385	1.05693	1.68732	1.30189	1.23981	1.3648	1.71651	1.28212	1.22979	1.23056	2.24773	2.2708	2.81972	1.41459	3.68114	3.95239
449.375	1.36936	1.13323	1.78129	1.99976	1.31194	2.04384	1.71857	2.61004	1.16056	1.45052	2.04809	1.93705	3.4315	2.42224	1.07245	1.01051	3.88066	5.64082	1.10266	1.06982	1.07274	2.09037		404.948	1.052	1.69479	1.29751	1.23473	1.351	1.78367	1.2837	1.22813	1.25016	2.19764	2.34061	2.77321	1.42131	3.8206	3.9834
450	1.40559	1.11803	1.73635	1.98391	1.28887	1.83823	1.70637	2.75369	1.1365	1.43844	2.56938	1.98312	3.42822	2.45723	1.05304	1.0092	3.82349	5.01531	1.07475	1.03859	1.06499	2.08175		405.511	1.03324	1.63903	1.30951	1.23299	1.36999	1.77902	1.31053	1.25173	1.25877	2.16026	2.31938	2.71256	1.42786	3.78977	4.02452
450.625	1.40814	1.09795	1.69984	2.03682	1.24838	1.67101	1.57164	2.9336	1.13547	1.4441	3.1424	2.02817	3.36218	2.50176	1.04798	1.00473	4.05678	4.48348	1.05069	1.02997	1.06582	2.12854		406.074	1.02664	1.65088	1.32215	1.23262	1.34981	1.73934	1.31482	1.26567	1.23507	2.06903	2.30599	2.68355	1.44252	3.67704	4.12127
451.25	1.38801	1.09486	1.75167	1.88882	1.23344	1.6255	1.49167	3.03502	1.15919	1.45561	3.56645	2.02849	3.24026	2.56919	1.04323	1.026	4.48155	4.32343	1.03201	1.03473	1.06174	2.2946		406.638	1.01855	1.69991	1.31196	1.21067	1.36234	1.69828	1.29058	1.24935	1.2481	1.95768	2.23151	2.60374	1.45682	3.37554	4.24337
451.875	1.34993	1.09666	1.75916	1.70416	1.24527	1.72669	1.4524	3.14754	1.19295	1.47354	3.5726	2.02532	3.10253	2.31298	1.04095	1.02247	4.96074	4.36259	1.02024	1.03228	1.05366	2.42848		407.201	1.04561	1.69214	1.31891	1.19987	1.37288	1.66108	1.30181	1.24939	1.27389	1.95091	2.1559	2.5593	1.46578	3.03561	4.1999
452.5	1.37874	1.10499	1.73812	1.62099	1.24998	1.64321	1.43592	3.28588	1.24346	1.50919	3.4238	2.10308	3.05795	2.12088	1.03232	1.00665	5.3784	4.32586	1.01729	1.05109	1.07309	2.24299		407.764	1.05815	1.6622	1.33941	1.1942	1.37336	1.62498	1.32039	1.26061	1.30088	2.03171	2.08091	2.57841	1.47018	2.88294	4.02602
453.125	1.42399	1.10805	1.66348	1.65993	1.21825	1.56124	1.39941	3.44389	1.36008	1.59542	3.40238	2.16022	3.06429	2.11807	1.01328	1.00383	5.12026	4.25248	1.01686	1.05594	1.06555	2.08637		408.327	1.05112	1.6669	1.30014	1.21055	1.34491	1.60461	1.32481	1.28802	1.31756	2.13884	2.04197	2.64383	1.47763	2.87466	3.8862
453.75	1.42478	1.11937	1.57919	1.69534	1.20022	1.60499	1.40522	3.76731	1.55889	1.70531	3.1714	2.21552	3.0514	2.35608	0.986866	1.01217	4.7816	4.24073	1.0125	1.03071	1.06112	2.22001		408.89	1.04903	1.67144	1.29832	1.20035	1.35353	1.5848	1.32994	1.30174	1.29309	2.15146	2.02297	2.7213	1.47703	2.95493	3.84701
454.375	1.42042	1.15314	1.49019	1.65616	1.18451	1.801	1.40987	4.30053	1.7456	1.76952	2.96536	2.20625	3.06258	2.43064	0.988274	1.02292	4.76466	4.29448	1.00874	1.02012	1.04488	2.36474		409.454	1.03179	1.7013	1.30639	1.19822	1.34934	1.58337	1.37445	1.31266	1.2927	2.16342	2.06515	2.76436	1.47184	2.99095	3.92213
455	1.39805	1.18961	1.43806	1.68562	1.18265	1.91078	1.45231	4.81424	1.70251	1.78039	2.7779	2.06774	3.15834	2.19406	1.03756	1.03131	4.99679	4.31949	1.01662	1.02516	1.02452	2.49897		410.017	1.01545	1.72317	1.34476	1.19593	1.36656	1.58666	1.32296	1.33001	1.28166	2.23265	2.12754	2.75144	1.46512	2.92906	3.99818
455.625	1.40263	1.17166	1.40358	1.82157	1.18419	1.74492	1.57456	5.1444	1.42975	1.75507	2.65687	1.91639	3.37389	2.0093	1.08298	1.04279	5.14753	4.19998	1.02273	1.01925	1.03334	2.61557		410.58	1.03677	1.73215	1.40016	1.20971	1.36185	1.56662	1.28822	1.32231	1.25779	2.2382	2.22365	2.82626	1.4595	2.92677	4.0656
456.25	1.34739	1.13991	1.41391	1.8999	1.18462	1.6148	1.74802	4.62286	1.22543	1.73372	2.76691	1.83121	3.55925	1.81025	1.09174	1.05232	5.08641	4.01214	1.02116	1.03234	1.0341	2.62961		411.143	1.10608	1.71781	1.37535	1.21129	1.35739	1.55943	1.33856	1.30946	1.25832	2.25281	2.35913	2.88021	1.4535	2.83494	4.0413
456.875	1.33494	1.13283	1.43628	2.04872	1.21447	1.56617	2.00638	4.15988	1.16301	1.74266	2.90977	1.8189	3.53983	1.67297	1.10228	1.04436	5.1171	3.90922	1.0195	1.03428	1.00447	2.51826		411.706	1.16947	1.70297	1.40258	1.22293	1.39162	1.5188	1.31606	1.29015	1.21732	2.30462	2.45531	2.82037	1.45031	2.82854	3.74984
457.5	1.32204	1.12783	1.42562	2.31499	1.25722	1.56369	2.32359	4.00928	1.17976	1.74705	2.89011	1.80792	3.35659	1.64943	1.119	1.04471	5.53321	3.90525	1.01952	1.01809	0.990934	2.22861		412.27	1.28837	1.67626	1.38448	1.21086	1.41039	1.49608	1.2989	1.29204	1.2473	2.31821	2.43158	2.71272	1.45759	2.84648	3.38083
458.125	1.30159	1.12908	1.42013	2.41735	1.30809	1.58051	2.51735	3.91696	1.22581	1.71884	2.67011	1.82346	3.14625	1.62769	1.11388	1.04273	5.92638	3.97916	1.0205	1.01338	1.00392	2.06672		412.833	1.49519	1.62932	1.34436	1.19483	1.38976	1.46376	1.34444	1.30246	1.25331	2.34176	2.37936	2.68559	1.46964	2.86203	3.08166
458.75	1.35097	1.13	1.41223	2.40444	1.48571	1.59472	2.39362	4.26026	1.21527	1.6822	2.37195	1.85734	2.92678	1.57206	1.06883	1.04248	6.07982	4.04218	1.0282	1.02762	1.04679	1.98152		413.396	1.46165	1.62095	1.33804	1.19524	1.38186	1.415	1.35405	1.26981	1.26132	2.35821	2.36357	2.63339	1.49276	2.8643	3.00878
459.375	1.39347	1.13908	1.44329	2.29726	1.80566	1.5917	1.95417	4.76417	1.20769	1.66005	2.19289	1.80072	2.76334	1.60045	1.04926	1.03077	5.97944	4.05627	1.03586	1.04052	1.07573	1.83362		413.959	1.31283	1.6405	1.34955	1.19885	1.36404	1.3872	1.34562	1.26402	1.24112	2.3261	2.33172	2.5613	1.50353	2.84009	3.06727
460	1.35285	1.14334	1.45584	2.17386	1.7481	1.57185	1.60569	5.2122	1.24105	1.66358	2.14273	1.70032	2.67783	1.66567	1.09428	1.02286	5.35934	4.01181	1.03871	1.02937	1.07791	1.80159		414.523	1.23525	1.66137	1.36662	1.22772	1.3415	1.35936	1.33429	1.286	1.25257	2.21769	2.36061	2.45606	1.47389	2.89709	3.13152
460.625	1.28876	1.14049	1.47237	2.04081	1.58982	1.5736	1.51112	5.2701	1.29797	1.67296	2.0857	1.56098	2.6783	1.67455	1.14334	1.02393	4.50209	3.87702	1.03327	1.01317	1.06109	1.8442		415.086	1.14996	1.64166	1.3854	1.24744	1.35174	1.3636	1.3153	1.28707	1.27705	2.14905	2.42074	2.42438	1.46037	2.93424	3.44695
461.25	1.26958	1.14343	1.51308	1.91796	1.4682	1.58795	1.4723	4.94854	1.3107	1.70856	2.02495	1.50232	2.68578	1.70152	1.16183	1.03645	4.22277	3.68826	1.02361	1.0245	1.05936	1.80568		415.649	1.15725	1.64136	1.3936	1.22299	1.32964	1.3533	1.34697	1.30044	1.26026	2.08577	2.4785	2.44298	1.47126	3.04013	4.21269
461.875	1.23875	1.16448	1.50926	2.06194	1.35928	1.58019	1.48562	4.34113	1.26553	1.7627	2.0365	1.47139	2.65212	1.77805	1.10882	1.05071	4.41001	3.58229	1.02078	1.01123	1.07448	1.76333		416.212	1.17235	1.63152	1.37607	1.23516	1.3514	1.33135	1.33238	1.315	1.2546	2.07856	2.52306	2.48665	1.47783	3.17509	5.04543
462.5	1.21899	1.16786	1.50594	2.23246	1.30419	1.65343	1.48172	3.76942	1.20769	1.79304	2.12531	1.47746	2.59087	1.86555	1.04861	1.05621	4.94081	3.58061	1.02064	0.996067	1.07433	1.85379		416.775	1.17297	1.66523	1.38482	1.22768	1.33612	1.31261	1.32891	1.33083	1.26564	2.10909	2.51135	2.54463	1.4849	3.27982	5.4656
463.125	1.22009	1.18683	1.51749	2.10938	1.31829	1.73464	1.43332	3.62004	1.18749	1.82771	2.20706	1.448	2.54222	1.92137	0.999069	1.05662	5.82531	3.60228	1.02442	0.995684	1.08104	2.05467		417.339	1.1241	1.71113	1.39729	1.2667	1.36768	1.28624	1.32174	1.33491	1.28102	2.11098	2.35521	2.52582	1.49551	3.33306	5.6077
463.75	1.20862	1.17891	1.59254	1.95672	1.35904	1.68407	1.37488	3.77178	1.2399	1.8576	2.31707	1.50499	2.4936	2.03887	0.956481	1.03928	6.51905	3.65241	1.03598	1.01074	1.08163	2.21567		417.902	1.0595	1.74743	1.39772	1.28415	1.38019	1.28235	1.33799	1.33123	1.22503	2.06559	2.14948	2.47066	1.49397	3.29019	5.61432
464.375	1.25192	1.17037	1.77375	1.91372	1.36728	1.72129	1.35686	3.68393	1.25872	1.85879	2.38236	1.49877	2.43057	2.02658	0.94213	1.03129	7.49787	3.80018	1.04331	1.03499	1.07459	2.15812		418.465	1.06174	1.77055	1.41195	1.27652	1.36493	1.28644	1.33154	1.35479	1.24858	2.08695	2.0802	2.3982	1.48025	3.09881	5.65228
465	1.32665	1.17463	1.90669	1.92164	1.35041	1.84108	1.37126	3.5248	1.21609	1.84821	2.40181	1.49832	2.40191	1.95419	0.947916	1.03345	7.412	4.10128	1.0434	1.03788	1.06085	2.17535		419.028	1.03841	1.7083	1.39138	1.26099	1.3504	1.27916	1.31709	1.36858	1.24202	2.11354	2.07113	2.31337	1.44877	2.93643	5.64829
465.625	1.34424	1.17579	1.92668	1.976	1.443	1.76136	1.34568	3.44229	1.1921	1.83772	2.38078	1.5096	2.41124	1.83473	0.96211	1.03159	7.35894	4.45539	1.04615	1.03071	1.0399	2.29275		419.591	1.02633	1.68809	1.34551	1.24344	1.35326	1.28757	1.32672	1.33789	1.27858	2.08006	2.0909	2.26799	1.41913	2.79896	5.51006
466.25	1.27891	1.1336	1.87129	1.94416	1.57494	1.76637	1.25859	3.28131	1.22304	1.84694	2.31723	1.48586	2.3467	1.75516	0.964301	1.03344	8.66522	4.6771	1.04739	1.03576	1.01115	2.38645		420.155	1.01815	1.704	1.35696	1.2558	1.38509	1.28909	1.31955	1.33398	1.28992	2.04211	2.14361	2.31032	1.4123	2.69543	5.3569
466.875	1.26691	1.08099	1.8578	1.89293	1.5432	1.88543	1.20495	3.17921	1.2925	1.87949	2.25773	1.4643	2.17136	1.68498	0.95331	1.03827	9.32404	4.47607	1.03612	1.05258	0.99811	2.64165		420.718	1.03174	1.6869	1.38748	1.30605	1.3769	1.26826	1.35744	1.31357	1.29858	2.02935	2.25159	2.34435	1.40567	2.56771	5.35652
467.5	1.30141	1.08184	1.93368	1.89493	1.50573	1.93348	1.22621	3.1015	1.35187	1.93236	2.12785	1.45857	2.07956	1.67705	0.941346	1.03392	9.70643	4.29705	1.02442	1.05625	0.990365	2.73085		421.281	1.03153	1.69791	1.36389	1.35821	1.39491	1.26866	1.35168	1.30657	1.26984	1.98361	2.41611	2.27319	1.40786	2.42861	5.35114
468.125	1.36194	1.10452	1.94527	1.92429	1.49779	1.9665	1.27884	3.04149	1.37387	1.92627	1.98402	1.42669	2.12498	1.66905	0.938965	1.04548	9.20022	4.16527	1.03049	1.04421	0.989109	2.62097		421.844	1.04491	1.67456	1.37812	1.39202	1.38502	1.27914	1.36499	1.31098	1.25147	1.94953	2.53457	2.18215	1.41297	2.32745	5.48147
468.75	1.3964	1.12367	1.91777	1.94591	1.50602	1.94748	1.34713	3.17732	1.37118	1.85548	1.87781	1.40677	2.22926	1.72845	0.962887	1.05642	8.0516	3.90674	1.04066	1.03457	0.992852	2.44084		422.407	1.05861	1.66735	1.35185	1.38677	1.35641	1.33027	1.35538	1.32054	1.24358	1.94325	2.55246	2.20162	1.42189	2.32168	5.55428
469.375	1.38675	1.13799	2.02073	2.05145	1.47629	1.99902	1.41206	3.31582	1.42732	1.81498	1.85952	1.43988	2.26715	1.83213	0.985539	1.04593	6.64646	3.57653	1.03896	1.01588	0.997252	2.39853		422.971	1.05241	1.59993	1.36082	1.37208	1.37981	1.35219	1.33778	1.32252	1.25277	1.93303	2.54537	2.19946	1.42932	2.32901	5.56042
470	1.42674	1.13752	1.9502	2.18091	1.49144	2.0955	1.44736	3.24022	1.53388	1.82362	1.91127	1.46029	2.2476	1.82882	0.978054	1.01758	6.79926	3.36579	1.03391	1.02123	0.989306	2.38592		423.534	1.05638	1.62949	1.35433	1.37064	1.38131	1.37476	1.32918	1.32829	1.25559	1.89283	2.65447	2.19231	1.42217	2.26365	5.36507
470.625	1.46248	1.11631	2.05122	2.23374	1.48585	2.23885	1.39548	3.3101	1.5193	1.83949	1.96363	1.55136	2.26032	1.82267	0.98401	1.01966	7.40534	3.36388	1.0423	1.01576	0.981797	2.39884		424.097	1.05459	1.68229	1.36169	1.38768	1.36744	1.40392	1.30912	1.3279	1.27341	1.90687	2.74543	2.2235	1.40088	2.22933	4.52427
471.25	1.4427	1.08871	2.22307	2.23834	1.42822	2.23956	1.35472	3.42472	1.38994	1.84219	2.04795	1.63157	2.30821	1.89019	0.970076	1.02419	8.66952	3.51474	1.07975	1.0047	1.00422	2.58927		424.66	1.05074	1.77123	1.36462	1.38602	1.37994	1.42134	1.28984	1.3385	1.2408	1.89506	2.7832	2.26174	1.39791	2.23892	3.53136
471.875	1.35697	1.05991	2.44402	2.21367	1.36425	2.17757	1.35783	3.56357	1.31207	1.84807	2.13383	1.62058	2.26671	1.94002	0.962526	1.02605	9.1784	3.72513	1.12155	1.00885	1.02327	2.83091		425.224	1.04919	1.83289	1.39428	1.40274	1.38542	1.40604	1.30776	1.33112	1.28914	1.95555	2.64768	2.25482	1.41376	2.2788	3.05918
472.5	1.34615	1.04569	2.75049	2.36925	1.3789	1.94377	1.34568	3.66414	1.27712	1.84786	2.08558	1.68004	2.10188	1.94463	0.966292	1.01633	8.08563	3.90805	1.13898	0.996503	1.0469	3.20743		425.787	1.07825	1.99029	1.35964	1.48159	1.4098	1.38305	1.31638	1.31643	1.27273	2.09725	2.44546	2.25795	1.44297	2.28725	2.96555
473.125	1.38764	1.05125	2.72235	2.48896	1.49733	1.76262	1.32189	3.74268	1.25174	1.85799	1.97104	1.70762	1.9192	2.07519	0.964997	1.01689	7.12284	4.10733	1.12073	0.996028	1.02883	2.89808		426.35	1.08602	2.1111	1.35249	1.50638	1.46541	1.35405	1.32018	1.29311	1.26108	2.5114	2.37617	2.21883	1.45169	2.24696	2.94703
473.75	1.43618	1.05634	2.35198	2.64859	1.69859	1.78682	1.29725	3.57044	1.22048	1.87416	1.8787	1.72411	1.81055	2.04481	0.959374	1.0276	6.44917	4.41947	1.08508	0.998808	0.998934	2.48797		426.913	1.07618	1.97047	1.3221	1.51874	1.58416	1.31518	1.33027	1.29438	1.26387	2.84862	2.42779	2.21381	1.45551	2.2243	2.91783
474.375	1.482	1.06161	2.05953	2.77079	1.82061	1.91032	1.28644	3.44377	1.2143	1.90674	1.85827	1.71004	1.78458	1.95909	0.977794	1.05449	5.86311	4.9511	1.0633	0.986852	0.984276	2.31855		427.476	1.07818	1.87615	1.30017	1.57152	1.58993	1.30648	1.30687	1.28564	1.264	2.89264	2.60024	2.25009	1.45505	2.21082	2.77349
475	1.47747	1.07152	1.91965	2.76521	1.90281	2.07949	1.31803	3.30246	1.23589	1.9442	1.89464	1.69646	1.82135	1.85457	1.00561	1.04773	5.37531	5.5144	1.08258	1.00027	0.988829	2.23134		428.04	1.13147	1.73704	1.31968	1.54644	1.58968	1.3337	1.33734	1.28523	1.27453	2.77463	2.62928	2.22342	1.4373	2.17763	2.72887
475.625	1.46707	1.0766	1.84161	2.50445	1.63262	2.14292	1.33283	3.23533	1.29486	1.92866	1.96819	1.7573	1.89111	1.71182	0.993524	1.03545	5.29242	5.62969	1.15067	1.0169	0.995088	2.13914		428.603	1.18858	1.72583	1.31956	1.50469	1.52452	1.38761	1.31751	1.2981	1.26326	2.5974	2.62231	2.26352	1.42229	2.04518	2.74211
476.25	1.48433	1.07775	1.67571	2.57264	1.47117	2.01958	1.29722	3.36429	1.37876	1.86925	1.94825	1.73317	1.92221	1.68218	0.999961	1.03235	5.25567	5.20371	1.26252	1.01694	0.986337	2.17484		429.166	1.20336	1.77365	1.32479	1.42304	1.4434	1.42596	1.28139	1.31	1.25664	2.47209	2.59295	2.26386	1.40346	1.91237	2.66019
476.875	1.49374	1.07469	1.50215	2.55507	1.36132	2.01315	1.28542	3.61726	1.5216	1.8265	1.91907	1.7243	1.88902	1.68389	0.995626	1.04395	5.24708	4.61043	1.36137	1.01965	0.993799	2.29434		429.729	1.24683	1.80701	1.34877	1.44697	1.42298	1.35317	1.33078	1.31587	1.24689	2.34066	2.59345	2.2259	1.39415	1.89678	2.74226
477.5	1.525	1.0743	1.41363	2.60734	1.38026	2.07422	1.30206	3.91235	1.69083	1.80356	1.95759	1.66709	1.81594	1.67689	0.969955	1.04697	5.21535	4.25492	1.4036	1.0139	1.00833	2.24837		430.292	1.22001	1.7723	1.34198	1.53746	1.37829	1.27986	1.32138	1.33335	1.25857	2.21884	2.59808	2.23722	1.38777	1.83875	2.91937
478.125	1.5174	1.07937	1.41385	2.44864	1.47769	2.09056	1.32803	3.71336	1.85173	1.81179	2.02846	1.60079	1.75793	1.80983	0.9475	1.04215	5.69962	4.2289	1.40984	1.0058	1.0087	1.99936		430.856	1.17996	1.69834	1.31651	1.55595	1.36117	1.2444	1.33326	1.3212	1.26681	2.0656	2.5476	2.27141	1.37392	1.803	3.02477
478.75	1.48165	1.13315	1.4757	2.00414	1.67467	2.03316	1.38808	3.40544	1.91108	1.8706	2.07461	1.60595	1.75804	1.9883	0.932599	1.03589	5.75809	4.21013	1.39185	1.0168	1.01336	1.91644		431.419	1.18493	1.68396	1.28763	1.52954	1.3642	1.24376	1.33194	1.31348	1.27971	1.9535	2.47645	2.25546	1.36601	1.76027	2.77255
479.375	1.54327	1.18783	1.5276	1.91016	1.65718	1.90116	1.46149	3.29263	1.86405	1.98595	2.02934	1.64661	1.79849	1.99937	0.932951	1.02932	6.338	4.05211	1.34084	1.03417	1.02236	1.9991		431.982	1.15625	1.70531	1.29581	1.45416	1.34422	1.22547	1.30706	1.29638	1.24558	1.89136	2.39535	2.27048	1.37708	1.73598	2.63673
480	1.58397	1.17926	1.64463	1.95432	1.53997	1.77187	1.58428	3.39499	1.88373	2.10867	2.02799	1.70594	1.81251	1.82445	0.94436	1.02456	6.61579	3.90528	1.24987	1.03651	1.03111	1.99867		432.545	1.16633	1.71809	1.32124	1.45689	1.32666	1.23376	1.29735	1.28236	1.24343	1.88618	2.33278	2.28841	1.40326	1.73984	2.63092
480.625	1.54768	1.14872	1.87637	2.07399	1.47229	1.68941	1.76321	3.46882	1.98846	2.19328	2.05386	1.83378	1.82587	1.61397	0.964536	1.02392	6.70656	4.08094	1.14746	1.03417	1.03599	2.11393		433.108	1.22136	1.70669	1.3555	1.48191	1.32382	1.23052	1.31625	1.29326	1.24541	1.94035	2.32735	2.37461	1.42719	1.79114	2.58279
481.25	1.43351	1.14259	2.21346	2.41952	1.39862	1.60031	1.7183	3.45525	2.01951	2.18521	2.19861	1.81678	1.85362	1.5017	0.978344	1.01718	7.54531	4.4064	1.08102	1.00989	1.05302	2.00401		433.672	1.36862	1.72608	1.33151	1.4945	1.32742	1.23023	1.30479	1.30244	1.23708	1.97402	2.29808	2.50042	1.43455	1.81489	2.51285
481.875	1.39499	1.13096	2.47968	3.0787	1.37754	1.39327	1.68646	3.15312	1.92335	2.2211	2.35042	1.73611	1.86609	1.43873	0.965464	1.0317	8.40737	4.40785	1.05146	1.00402	1.07854	1.9465		434.235	1.56299	1.75351	1.32651	1.50498	1.32982	1.22607	1.3399	1.31505	1.25711	1.9712	2.29679	2.58826	1.4336	1.85473	2.39783
482.5	1.41597	1.12157	2.67878	3.26144	1.35535	1.27856	1.73165	2.69299	1.85935	2.30947	2.4229	1.68225	1.86218	1.47976	0.964876	1.03372	7.14539	4.21506	1.04541	1.01086	1.10202	2.14557		434.798	1.65402	1.73991	1.34155	1.54177	1.36164	1.21878	1.33486	1.34857	1.23398	1.85784	2.24117	2.57255	1.43865	1.85743	2.32155
483.125	1.45015	1.09201	2.88476	2.76956	1.33678	1.25404	1.84034	2.5899	1.84281	2.42328	2.35272	1.59457	1.86283	1.44388	0.9813	1.01288	6.21554	4.20166	1.04339	1.01585	1.11063	2.24955		435.361	1.61208	1.78415	1.38477	1.58703	1.33771	1.20842	1.35002	1.39031	1.25222	1.8055	2.22217	2.52601	1.4329	1.84021	2.41382
483.75	1.53387	1.07297	3.20216	2.74453	1.32899	1.23486	1.91324	2.58416	1.87431	2.52009	2.27901	1.58235	1.84944	1.41988	0.990674	1.00661	5.49757	4.45492	1.03887	1.02465	1.12131	2.11771		435.925	1.62057	1.7921	1.38826	1.55536	1.36106	1.21551	1.34318	1.41435	1.20289	1.74055	2.25024	2.45588	1.43113	1.88544	2.53886
484.375	1.59176	1.07413	3.46545	2.96112	1.31974	1.23311	2.01868	2.60121	2.0268	2.52392	2.1768	1.57292	1.82574	1.4038	0.975925	1.0164	5.22711	4.84154	1.03447	1.04497	1.12204	1.90489		436.488	1.5507	1.75139	1.31813	1.56262	1.36708	1.24037	1.32382	1.41949	1.20055	1.75697	2.26295	2.37509	1.4469	1.9066	2.57797
485	1.60152	1.0639	3.55065	2.71168	1.25271	1.27095	2.09626	2.68314	2.14844	2.50392	2.04061	1.59773	1.78076	1.395	0.964624	1.01692	4.81856	5.15547	1.04442	1.06147	1.12042	1.91783		437.051	1.39647	1.69965	1.26984	1.49424	1.36952	1.25187	1.34011	1.4268	1.21527	1.78062	2.32838	2.2881	1.47251	1.83048	2.61328
485.625	1.5664	1.0562	3.44004	2.44161	1.28067	1.32558	2.08957	2.78206	2.22806	2.49011	2.04342	1.62852	1.70822	1.48547	0.95837	1.00925	4.64745	4.96512	1.05569	1.06972	1.13848	2.13217		437.614	1.28971	1.74164	1.26698	1.49642	1.35634	1.24727	1.35716	1.40307	1.2324	1.75095	2.4985	2.24669	1.45582	1.79242	2.57615
486.25	1.5441	1.04409	3.46142	2.53392	1.33557	1.40201	1.88826	2.75784	2.24321	2.47145	2.19593	1.63245	1.67145	1.57695	0.947367	1.00515	4.59056	4.25111	1.05306	1.06375	1.13537	2.25304		438.177	1.23075	1.69584	1.26421	1.50988	1.31971	1.25903	1.37559	1.40316	1.25519	1.753	2.67695	2.28389	1.43164	1.78581	2.64858
486.875	1.6226	1.04169	3.54113	2.54751	1.32188	1.46689	1.77037	2.70165	2.2302	2.3806	2.64432	1.60163	1.67093	1.69533	0.946362	1.01185	4.62268	3.54408	1.04733	1.04183	1.1357	2.32952		438.741	1.1486	1.71438	1.25715	1.54209	1.34216	1.26776	1.35794	1.38765	1.27111	1.72373	2.78135	2.28002	1.411	1.77701	2.67174
487.5	1.66439	1.05433	3.63011	2.17801	1.30405	1.48363	1.82266	2.60065	2.18135	2.22921	2.91379	1.57643	1.67068	1.81873	0.948636	1.00565	4.19253	3.12452	1.04625	1.03914	1.15091	2.30613		439.304	1.14692	1.73597	1.29009	1.54651	1.35075	1.25685	1.33208	1.39787	1.24257	1.7232	2.80463	2.26052	1.38846	1.78714	2.72134
488.125	1.62005	1.07234	3.62095	1.93769	1.24658	1.53608	1.92907	2.50283	2.09765	2.11664	3.08637	1.53649	1.68424	1.95517	0.943342	1.02179	3.81473	2.80969	1.05423	1.0355	1.16323	2.11476		439.867	1.16408	1.7794	1.31049	1.54288	1.3939	1.25461	1.33366	1.40164	1.20955	1.71279	2.69413	2.23374	1.37007	1.81987	2.6701
488.75	1.65144	1.07328	3.57236	1.84926	1.25059	1.55978	1.89135	2.32701	2.01218	2.06228	3.23481	1.50238	1.74812	1.91634	0.940576	1.0263	3.79835	2.5062	1.0686	1.01371	1.18243	1.82123		440.43	1.19083	1.79381	1.34848	1.54304	1.38745	1.22902	1.36181	1.40659	1.20225	1.68566	2.54176	2.20851	1.34911	1.89059	2.76959
489.375	1.85481	1.08266	3.34586	1.72978	1.34728	1.56855	1.79411	2.2706	1.88147	2.01094	3.14161	1.4723	1.80494	1.97329	0.943438	1.01232	3.82839	2.41311	1.07571	1.0438	1.21169	1.72126		440.993	1.23378	1.85662	1.34148	1.62176	1.40477	1.20847	1.36247	1.38892	1.19995	1.70766	2.34073	2.21208	1.34315	1.91968	2.76751
490	2.33338	1.10938	3.19594	1.65245	1.4497	1.61248	1.66792	2.30277	1.77084	1.98388	2.82703	1.47622	1.71096	2.2165	0.941675	1.01034	3.71754	2.54271	1.06932	1.07154	1.27701	1.70036		441.557	1.22698	1.88765	1.36287	1.64225	1.39271	1.1988	1.38019	1.35724	1.19446	1.69248	2.19968	2.18762	1.3476	1.92723	2.734
490.625	2.98754	1.14026	3.16268	1.64204	1.54075	1.7142	1.55692	2.31638	1.695	2.00155	2.3382	1.49015	1.6176	2.33437	0.939615	1.01954	3.78619	2.68379	1.07078	1.10117	1.4123	1.662		442.12	1.17208	1.94572	1.36639	1.52187	1.44246	1.19433	1.35132	1.32197	1.21574	1.69368	2.10951	2.1869	1.34686	1.94715	2.65548
491.25	3.25433	1.15734	3.14974	1.67498	1.51581	1.74037	1.55032	2.31081	1.64273	2.02164	1.85342	1.50621	1.627	2.22863	0.957233	1.00555	3.95812	2.72012	1.07793	1.15074	1.72835	1.61845		442.683	1.13362	1.9808	1.35447	1.52804	1.41193	1.17484	1.37968	1.30732	1.22036	1.69698	1.9556	2.23613	1.34227	2.0265	2.43903
491.875	2.83252	1.15302	3.07693	1.69483	1.45292	1.63694	1.56061	2.31317	1.61729	1.98952	1.57003	1.54333	1.71857	2.09922	0.984706	1.01535	3.93885	2.67171	1.10476	1.21856	1.75337	1.58077		443.246	1.12354	2.0019	1.34157	1.4935	1.40083	1.16287	1.37121	1.29717	1.25434	1.70637	1.77615	2.28207	1.33232	2.21279	2.30267
492.5	2.18731	1.14664	2.91035	1.5621	1.42482	1.52779	1.55765	2.2845	1.62003	1.95082	1.45357	1.5911	1.82617	2.20718	0.992538	1.02872	3.96773	2.55815	1.13821	1.28601	1.51606	1.58829		443.809	1.12196	1.91571	1.33725	1.46502	1.40667	1.17064	1.39598	1.27546	1.21613	1.6624	1.72081	2.3428	1.34562	2.38662	2.28357
493.125	1.87793	1.15431	2.70573	1.43799	1.43201	1.45999	1.66973	2.26495	1.64282	1.89216	1.49935	1.64969	1.88625	2.51833	0.987845	1.02817	4.04674	2.45278	1.17997	1.31491	1.45108	1.57118		444.373	1.14615	1.86489	1.31278	1.43	1.46265	1.18324	1.4038	1.25943	1.24276	1.61862	1.71735	2.37577	1.36206	2.39621	2.3924
493.75	1.77927	1.15751	2.85556	1.52872	1.56322	1.43312	1.86619	2.23252	1.69192	1.83807	1.58004	1.65847	1.8354	2.79512	0.988962	1.02153	4.10537	2.40402	1.2268	1.32126	1.4998	1.55095		444.936	1.15985	1.83143	1.31305	1.43288	1.47862	1.18321	1.39081	1.27094	1.26678	1.61738	1.74677	2.30204	1.36507	2.25999	2.51935
494.375	1.81628	1.1689	3.30482	1.59697	1.7522	1.47556	1.90949	2.24805	1.6821	1.79058	1.57227	1.65044	1.78187	2.77587	1.00612	1.02068	4.00876	2.36017	1.24687	1.31225	1.54644	1.49555		445.499	1.18776	1.82663	1.32451	1.45522	1.49086	1.19401	1.38481	1.25443	1.27631	1.67416	1.83022	2.22074	1.38133	2.13827	2.73802
495	1.77754	1.21779	3.79531	1.58113	2.00025	1.46809	1.85324	2.34469	1.64418	1.75439	1.52057	1.61712	1.82786	2.86572	1.03081	1.01033	3.8268	2.29569	1.23335	1.26376	1.48401	1.48541		446.062	1.2007	1.86008	1.33333	1.47705	1.52402	1.2118	1.39095	1.2418	1.22868	1.69539	1.9108	2.20698	1.39194	2.07123	2.87345
495.625	1.60085	1.27152	4.01029	1.60252	2.43649	1.43154	1.79872	2.4314	1.64938	1.71142	1.48646	1.63906	1.95035	3.06459	1.02714	1.00463	3.82953	2.25766	1.20023	1.21396	1.37929	1.51603		446.626	1.1765	1.94205	1.37919	1.42552	1.49435	1.23085	1.3977	1.24696	1.23445	1.73162	1.94976	2.20611	1.39428	2.1028	2.82492
496.25	1.43336	1.30954	3.99824	1.54941	2.70672	1.51072	1.75868	2.48365	1.64701	1.69104	1.48762	1.69057	2.07874	3.20049	1.01578	1.00785	3.96131	2.33387	1.16428	1.21735	1.2598	1.56019		447.189	1.14124	2.1803	1.44268	1.42008	1.5031	1.19638	1.45357	1.24464	1.24286	1.80225	1.99295	2.24958	1.3821	2.10377	2.79047
496.875	1.35045	1.29324	3.9805	1.49011	2.80714	1.53332	1.75139	2.57221	1.61744	1.65376	1.45719	1.63948	2.06262	3.31973	0.997819	1.00847	4.18976	2.5023	1.12986	1.17362	1.1755	1.57053		447.752	1.15207	2.47024	1.43593	1.45393	1.53748	1.16337	1.52983	1.24022	1.26821	1.79461	2.00625	2.36508	1.39062	2.1583	2.73041
497.5	1.32025	1.24273	4.10296	1.51515	2.63227	1.50539	1.74936	2.67081	1.57613	1.60251	1.4411	1.52406	2.01174	3.38757	0.981104	0.999726	4.87987	2.58908	1.10419	1.13094	1.11564	1.64214		448.315	1.13262	2.44062	1.40962	1.4508	1.53347	1.12767	1.57291	1.2309	1.27011	1.77288	2.00932	2.45982	1.39392	2.23373	2.57941
498.125	1.33819	1.23142	4.19135	1.59238	2.36828	1.48419	1.7088	2.75985	1.51939	1.52325	1.45415	1.47461	1.9827	3.15829	0.970738	1.00035	5.45291	2.62342	1.08218	1.11648	1.1187	1.61481		448.878	1.13727	2.46352	1.36843	1.44191	1.5653	1.12726	1.61841	1.22986	1.25853	1.76893	1.96175	2.42669	1.37933	2.29899	2.33297
498.75	1.361	1.23189	4.33233	1.58947	2.28864	1.50803	1.63604	2.76833	1.49716	1.42357	1.49737	1.49513	1.94272	3.34316	0.971913	1.00681	5.90338	2.63887	1.06201	1.12199	1.10787	1.53312		449.442	1.13205	2.46569	1.34196	1.456	1.62968	1.14231	1.60946	1.24251	1.21971	1.79717	1.90782	2.30441	1.37941	2.27913	2.25624
499.375	1.38725	1.24067	4.37588	1.60625	2.51171	1.56947	1.62524	2.63716	1.4898	1.33962	1.58717	1.51677	1.873	3.4805	0.964447	1.00437	5.86239	2.5525	1.04307	1.11895	1.09684	1.44283		450.005	1.13337	2.20446	1.37352	1.43382	1.72165	1.17073	1.60761	1.25809	1.23529	1.79449	1.82682	2.18061	1.38704	2.05936	2.3635
500	1.40436	1.2635	4.23397	1.64272	2.73838	1.61894	1.78451	2.53039	1.51003	1.28898	1.63826	1.5114	1.7774	3.27051	0.956166	1.00573	5.72294	2.41364	1.03012	1.12395	1.11027	1.4259		450.568	1.10842	1.98766	1.35531	1.40786	1.77082	1.18694	1.68294	1.25682	1.21469	1.77467	1.79607	2.12906	1.38742	1.76285	2.41534
500.625	1.42866	1.27989	3.71385	1.78889	2.68436	1.51334	1.94925	2.53919	1.50639	1.28768	1.64225	1.51075	1.7059	3.32623	0.950335	1.00389	5.77894	2.28279	1.02547	1.12295	1.07872	1.43785		451.131	1.09142	1.94286	1.36435	1.39667	1.71105	1.19521	1.7534	1.27056	1.22248	1.75445	1.82826	2.15525	1.38503	1.69218	2.36135
501.25	1.45736	1.30438	3.14669	2.22212	2.36819	1.45827	1.95978	2.59536	1.4694	1.3022	1.67101	1.52888	1.62283	3.27573	0.956172	1.00514	5.58972	2.16659	1.02444	1.11036	1.07398	1.48175		451.694	1.08921	1.94812	1.3575	1.40144	1.69821	1.20398	1.78424	1.28095	1.23542	1.77365	1.88646	2.30677	1.38284	1.68958	2.29294
501.875	1.46142	1.32718	2.66495	2.6562	2.04956	1.54037	1.82613	2.70003	1.4312	1.30733	1.69147	1.51045	1.54164	3.0136	0.954151	1.00392	5.15266	2.07638	1.02622	1.1215	1.09012	1.53033		452.258	1.06975	1.88587	1.37935	1.43225	1.7346	1.222	1.79541	1.27741	1.22251	1.84622	1.88545	2.68235	1.38087	1.80048	2.24621
502.5	1.4594	1.35393	2.61126	2.83562	1.87746	1.69986	1.76891	2.74583	1.40423	1.32222	1.66318	1.54458	1.46289	2.76277	0.963809	1.02002	5.15112	1.96465	1.02611	1.13442	1.10473	1.53098		452.821	1.06521	1.95221	1.38818	1.43849	1.71939	1.22363	1.75695	1.27346	1.21874	1.85367	1.90829	3.20602	1.36338	1.81363	2.19289
503.125	1.3973	1.34938	2.72076	2.94747	1.99343	1.78819	1.7175	2.64272	1.36884	1.34516	1.63613	1.70678	1.40377	2.30519	0.957631	1.01208	5.4475	1.90742	1.02592	1.1477	1.09407	1.46522		453.384	1.0901	1.90873	1.40137	1.46702	1.64346	1.2386	1.67396	1.27237	1.22209	1.78848	2.02109	3.68223	1.36055	1.8794	2.11269
503.75	1.33343	1.34079	2.78437	2.93014	2.32142	1.78852	1.57331	2.64048	1.34187	1.3794	1.59736	2.04695	1.34955	1.85299	0.950777	0.997133	5.61725	1.9777	1.02662	1.16679	1.04368	1.45568		453.947	1.11064	1.88715	1.37193	1.55247	1.57495	1.22099	1.62344	1.25754	1.21757	1.82255	2.08622	3.91372	1.35553	1.94238	2.14045
504.375	1.29638	1.4063	2.84776	3.07017	2.34864	1.70413	1.44262	2.67179	1.35615	1.42473	1.54669	2.3338	1.29149	1.75633	0.950027	0.997555	5.52567	2.08618	1.02807	1.16856	1.01232	1.43562		454.51	1.1459	1.9544	1.40552	1.57957	1.48212	1.20553	1.5467	1.25447	1.24934	1.85292	1.98658	3.7141	1.34262	1.98404	2.20909
505	1.2964	1.50122	2.81009	2.82472	2.32818	1.65563	1.39092	2.61443	1.40313	1.45078	1.53604	2.25247	1.24875	1.66886	0.946577	0.996711	5.06657	2.09767	1.03192	1.14853	1.00244	1.41687		455.074	1.16428	1.87622	1.40923	1.59095	1.43076	1.20761	1.50679	1.25071	1.23867	1.90435	1.98053	3.43956	1.32639	1.9351	2.28814
505.625	1.31053	1.6541	2.72882	2.53367	2.43152	1.64284	1.40371	2.59168	1.45629	1.47383	1.57596	2.00508	1.24102	1.59212	0.95031	0.991526	5.1667	1.99314	1.03436	1.14371	1.0031	1.43684		455.637	1.14943	1.84	1.37622	1.60616	1.40351	1.21429	1.41684	1.2384	1.25469	1.89656	1.94806	3.21212	1.34472	1.90825	2.3265
506.25	1.32518	1.69642	2.71147	2.37095	2.44784	1.70155	1.48929	2.58207	1.48957	1.53902	1.58013	1.85921	1.24965	1.50317	0.944309	0.988069	5.42642	1.88105	1.03833	1.11852	0.995434	1.48636		456.2	1.1468	1.8196	1.37691	1.64065	1.38601	1.20887	1.40542	1.23261	1.30074	1.90154	1.86157	3.01819	1.37785	1.89103	2.35696
506.875	1.34386	1.56838	2.76188	2.32209	2.3606	1.66835	1.55813	2.54053	1.4786	1.58549	1.56906	1.87828	1.24643	1.50732	0.936432	0.993793	5.03773	1.82278	1.04259	1.10178	0.98151	1.54984		456.763	1.14259	1.78738	1.4053	1.6761	1.37531	1.20793	1.43456	1.2213	1.37176	1.9235	1.82096	2.94673	1.39055	1.92035	2.37586
507.5	1.39016	1.44814	2.81776	2.29591	2.26121	1.73139	1.53418	2.48567	1.46799	1.55335	1.55905	1.92571	1.25081	1.59865	0.927658	0.98977	4.73935	1.77888	1.05006	1.08981	0.982354	1.58924		457.327	1.13396	1.82944	1.44719	1.66326	1.36811	1.19671	1.3907	1.21952	1.42281	1.86842	1.8125	2.8123	1.42834	1.92282	2.36476
508.125	1.39434	1.3573	2.86268	2.33354	2.24554	1.7955	1.51924	2.44434	1.49343	1.48711	1.52772	1.90447	1.2772	1.54955	0.921941	0.999602	4.67272	1.74657	1.05112	1.08529	0.981079	1.66272		457.89	1.15012	1.78957	1.46895	1.64027	1.34471	1.18836	1.40469	1.24117	1.35098	1.79416	1.78086	2.63146	1.445	1.87644	2.33288
508.75	1.36538	1.29992	2.97589	2.64731	2.41628	1.75571	1.55517	2.41156	1.57013	1.43132	1.50207	1.91336	1.32058	1.50422	0.938328	1.01656	4.67961	1.76405	1.03804	1.05357	0.984819	1.67197		458.453	1.15036	1.80589	1.51505	1.62755	1.31405	1.18041	1.40596	1.23858	1.33136	1.75022	1.7102	2.55712	1.41958	1.81229	2.30556
509.375	1.32963	1.27022	2.98431	3.04671	2.6705	1.69963	1.57214	2.31588	1.54898	1.39567	1.53192	1.96736	1.34134	1.48768	0.951062	1.02119	4.84749	1.78097	1.02897	1.02227	0.991687	1.57908		459.016	1.12667	1.83803	1.50298	1.62399	1.30711	1.15732	1.38351	1.20345	1.3097	1.69918	1.6396	2.5691	1.38225	1.82729	2.19031
510	1.3389	1.26695	2.96241	2.80659	2.83208	1.57187	1.59443	2.28295	1.4126	1.38057	1.55854	1.98351	1.32735	1.43697	0.96338	1.01492	4.77704	1.78473	1.03447	1.02313	0.979241	1.56495		459.579	1.10069	1.84291	1.52454	1.59261	1.29401	1.17122	1.39896	1.1883	1.32262	1.70629	1.61135	2.73787	1.38691	1.77497	2.12585
510.625	1.35924	1.29224	2.75571	2.67792	2.83917	1.44638	1.5821	2.3713	1.3246	1.36326	1.53542	1.89117	1.30824	1.46185	0.969457	1.01135	4.74835	1.7799	1.04151	1.03592	0.982125	1.5189		460.143	1.09352	1.85741	1.53296	1.64794	1.30081	1.16807	1.38984	1.19086	1.33584	1.69769	1.55797	2.99769	1.39884	1.73214	2.10806
511.25	1.40818	1.29823	2.41622	2.88854	2.86443	1.38239	1.54268	2.57519	1.32869	1.33974	1.48515	2.00249	1.30365	1.43025	0.961649	1.03296	4.75558	1.74833	1.03563	1.04189	0.992367	1.52377		460.706	1.14456	1.89773	1.56524	1.71658	1.32941	1.1551	1.43063	1.1823	1.38747	1.67182	1.47955	3.20726	1.38621	1.68334	2.17347
511.875	1.43669	1.28602	2.07148	3.10521	2.90701	1.38137	1.52917	2.7734	1.33991	1.31601	1.43816	2.18051	1.30082	1.41824	0.945484	1.05893	4.72151	1.67392	1.02301	1.04414	1.00237	1.50807		461.269	1.13955	1.87616	1.60831	1.79961	1.32534	1.18242	1.45752	1.2	1.51719	1.68465	1.47672	3.2639	1.37525	1.67598	2.24086
512.5	1.45381	1.25489	1.88859	2.69773	3.13823	1.46741	1.59725	2.85994	1.35504	1.29983	1.39733	2.21992	1.28817	1.4315	0.925764	1.09034	4.97474	1.60341	1.0195	1.0286	0.989804	1.43751		461.832	1.14393	1.87574	1.63331	1.88424	1.32841	1.19919	1.47014	1.20515	1.59985	1.63039	1.47687	3.13111	1.37569	1.6997	2.26848
513.125	1.43292	1.21451	1.84628	2.30453	3.37045	1.51787	1.74008	2.81589	1.38643	1.29733	1.37106	2.03228	1.25153	1.46743	0.919219	1.09707	5.56592	1.55892	1.02057	1.01371	0.993544	1.41624		462.395	1.169	1.85822	1.56874	1.9474	1.38263	1.19549	1.46598	1.19818	1.61969	1.6128	1.46832	2.94068	1.37049	1.75166	2.27702
513.75	1.4591	1.18229	1.8937	2.27635	3.48966	1.54388	1.76725	2.71758	1.38607	1.32307	1.39465	1.84001	1.20622	1.50876	0.933609	1.06414	6.42673	1.5434	1.02559	1.00643	1.00619	1.46874		462.959	1.11851	1.80558	1.54159	1.98686	1.35558	1.20485	1.44979	1.20295	1.52369	1.57787	1.48512	2.76845	1.35077	1.70884	2.25168
514.375	1.47576	1.17804	1.91582	2.43665	3.39883	1.58444	1.626	2.66945	1.35993	1.34919	1.49567	1.92524	1.17053	1.48683	0.930293	1.03219	6.50432	1.53587	1.02063	1.00561	1.01072	1.49862		463.522	1.12661	1.76518	1.46738	1.99578	1.34751	1.19823	1.45881	1.20933	1.51682	1.60368	1.50544	2.68138	1.34572	1.69119	2.24026
515	1.50642	1.1977	1.89724	2.87174	3.11828	1.55042	1.50488	2.7267	1.34128	1.34481	1.52732	2.08977	1.14713	1.47321	0.935757	1.01121	5.90357	1.51652	1.01355	0.996081	0.992099	1.51235		464.085	1.12354	1.7863	1.42889	1.96174	1.33894	1.19317	1.48517	1.21789	1.49914	1.64856	1.51206	2.67792	1.3574	1.70532	2.23775
515.625	1.5258	1.25308	1.85265	3.23503	2.83192	1.45621	1.45953	2.93671	1.34848	1.35447	1.49598	2.20107	1.14111	1.45942	0.953583	1.02423	5.21777	1.5281	1.00894	0.998874	0.989051	1.46292		464.648	1.13143	1.79851	1.3941	1.91209	1.33724	1.19212	1.48151	1.23767	1.45958	1.66187	1.5124	2.66508	1.36703	1.8136	2.20374
516.25	1.49579	1.38483	1.85824	2.74219	2.68945	1.36684	1.41258	3.12332	1.3734	1.37689	1.48592	2.43054	1.14856	1.45337	0.966828	1.02115	4.55458	1.5575	1.01389	1.01652	0.997461	1.48445		465.211	1.13542	1.81236	1.42378	1.92412	1.31637	1.16767	1.46391	1.25347	1.41632	1.68159	1.54844	2.74254	1.3659	1.86369	2.17776
516.875	1.51225	1.54102	1.9449	2.35239	2.62794	1.3304	1.4533	2.91752	1.39148	1.378	1.48806	2.44521	1.15354	1.51487	0.973007	1.01812	4.62411	1.53298	1.02101	1.04714	0.984702	1.47959		465.775	1.1272	1.7357	1.52536	1.92393	1.31944	1.14539	1.42813	1.24617	1.37067	1.70157	1.53371	3.01504	1.3617	1.89372	2.24271
517.5	1.51506	1.58951	2.06831	2.183	2.71806	1.3831	1.47651	2.58861	1.3506	1.35537	1.50676	2.25132	1.16668	1.55712	0.972494	0.974966	4.72161	1.44204	1.02674	1.06196	0.998208	1.46508		466.338	1.17291	1.71138	1.68616	1.85904	1.30497	1.11805	1.43811	1.23393	1.34869	1.72482	1.52367	3.18366	1.36808	1.9604	2.24954
518.125	1.54432	1.5195	2.16473	1.96189	2.78493	1.50478	1.51269	2.4415	1.3497	1.30966	1.50144	2.30715	1.20143	1.43333	0.961926	0.969489	4.41774	1.33519	1.03465	1.05787	1.00927	1.42894		466.901	1.15457	1.77376	1.85057	1.79246	1.30577	1.11563	1.44402	1.21939	1.40145	1.70247	1.50726	3.15267	1.3837	2.03945	2.2334
518.75	1.58531	1.46051	2.24635	1.88405	2.7798	1.7309	1.54852	2.37516	1.4164	1.29153	1.44867	2.20717	1.23262	1.3691	0.962255	0.993662	4.09577	1.32056	1.03617	1.03102	1.01698	1.40684		467.464	1.16572	1.79282	2.05962	1.75438	1.34323	1.13648	1.45859	1.20795	1.44214	1.71502	1.49352	3.02299	1.3759	2.06955	2.24029
519.375	1.63301	1.42639	2.43492	1.91023	2.61401	2.09644	1.57072	2.29864	1.48151	1.28999	1.40262	1.9473	1.23961	1.32674	0.959349	1.01045	4.00514	1.39854	1.01963	1.00806	1.00837	1.4228		468.027	1.13483	1.85266	2.19479	1.72336	1.38254	1.16852	1.44985	1.19359	1.4675	1.68696	1.53151	2.8872	1.35394	2.10322	2.17607
520	1.786	1.37486	2.64864	1.96128	2.48537	2.15949	1.6371	2.25771	1.4991	1.30976	1.36793	1.84167	1.23664	1.29209	0.956508	1.0018	3.96189	1.49567	1.00728	0.994576	1.00886	1.42247		468.591	1.12839	1.83882	2.14848	1.74057	1.39732	1.18598	1.42344	1.19359	1.47765	1.6745	1.53115	2.82322	1.34475	2.2374	2.27513
520.625	1.97582	1.34776	2.86215	1.89926	2.43601	2.06765	1.76474	2.22383	1.48363	1.32664	1.32621	1.7946	1.25057	1.29641	0.954889	1.00036	4.17058	1.56381	1.00547	0.990555	1.01325	1.44315		469.154	1.11443	1.83051	2.11907	1.68433	1.42403	1.1873	1.41709	1.20374	1.47128	1.65164	1.51696	2.66578	1.3416	2.32584	2.3235
521.25	2.02672	1.39016	3.23397	1.86521	2.37943	1.84419	1.83376	2.22468	1.48549	1.34393	1.277	1.77022	1.28085	1.33587	0.947746	1.00838	4.45999	1.5519	1.01338	0.995823	1.02312	1.45761		469.717	1.08923	1.8499	2.05681	1.72821	1.39853	1.17589	1.42024	1.22148	1.46566	1.66958	1.57431	2.46241	1.34887	2.23764	2.3339
521.875	2.10299	1.3667	3.53911	1.94241	2.3475	1.58823	1.84693	2.2733	1.47508	1.36073	1.25135	1.74979	1.30409	1.31394	0.944271	1.00121	4.75059	1.46726	1.02131	1.01018	1.02659	1.41903		470.28	1.10863	1.84845	2.00772	1.82917	1.35693	1.15321	1.44636	1.21596	1.43451	1.70918	1.73542	2.303	1.35076	2.2058	2.30147
522.5	2.16093	1.3363	3.65447	1.89867	2.14582	1.45529	1.76665	2.32804	1.42501	1.35538	1.23998	1.78074	1.32371	1.25739	0.946994	0.998592	4.65982	1.42707	1.02352	1.01846	1.01177	1.41487		470.844	1.18187	1.82439	2.00663	1.96068	1.33923	1.15098	1.48199	1.20145	1.41079	1.67689	1.84692	2.22053	1.35202	2.16877	2.23369
523.125	2.04203	1.34153	3.74953	1.8873	2.01144	1.3413	1.64474	2.3438	1.3795	1.32398	1.21757	1.90335	1.31386	1.20598	0.975413	1.00772	4.4376	1.49944	1.02929	1.0276	1.00842	1.41448		471.407	1.25519	1.8066	2.03161	1.97713	1.3291	1.15484	1.49808	1.20901	1.3995	1.65374	1.73746	2.17727	1.36145	2.1208	2.2251
523.75	1.91457	1.38965	3.55015	1.92241	1.907	1.27586	1.54897	2.27183	1.34545	1.29909	1.20101	1.98626	1.24485	1.18275	1.00072	1.02489	4.18048	1.64449	1.03427	1.05772	0.997142	1.43274		471.97	1.27278	1.73446	2.03339	1.98169	1.33192	1.16354	1.51646	1.22232	1.37009	1.72317	1.60266	2.19406	1.35335	2.04097	2.30138
524.375	1.87058	1.42625	3.25402	1.81373	2.01618	1.30167	1.49923	2.25728	1.35358	1.29742	1.20363	2.05291	1.17408	1.17984	0.993232	1.02726	3.9452	1.78541	1.03258	1.06297	1.00712	1.43602		472.533	1.25461	1.70111	2.00019	1.97416	1.33659	1.16433	1.48668	1.23762	1.3578	1.70748	1.5379	2.26993	1.33244	2.04603	2.38901
525	1.86743	1.4182	3.0522	1.78786	2.22352	1.32777	1.4949	2.31846	1.39486	1.31362	1.19555	2.20725	1.15031	1.15884	0.979487	1.04064	3.73763	1.83964	1.03291	1.05776	1.02501	1.45008		473.096	1.2105	1.6785	1.9227	2.05628	1.33073	1.16291	1.45464	1.26695	1.38749	1.72886	1.5226	2.37741	1.3446	1.97841	2.46618
525.625	1.75788	1.39408	2.80639	1.91429	2.31074	1.35959	1.49806	2.38225	1.4713	1.33724	1.20131	2.26271	1.15803	1.19132	0.970278	1.05628	3.43036	1.78651	1.03709	1.06296	1.04272	1.47652		473.66	1.23483	1.71439	1.88309	2.11648	1.3195	1.15679	1.41047	1.2884	1.43778	1.74494	1.52606	2.50693	1.37458	1.85219	2.39449
526.25	1.63316	1.33478	2.88982	2.28532	2.27875	1.3342	1.50654	2.42176	1.55583	1.3543	1.22567	2.22894	1.16651	1.23938	0.983479	1.02448	3.85417	1.6806	1.04113	1.03849	1.0209	1.44027		474.223	1.3079	1.72482	1.87316	2.13238	1.35312	1.16041	1.42218	1.30181	1.43865	1.73733	1.57352	2.57072	1.38029	1.7269	2.24386
526.875	1.58384	1.24063	3.26078	2.4833	2.19716	1.27466	1.49309	2.3922	1.46117	1.34988	1.22884	2.29055	1.17511	1.25352	0.975306	1.0155	4.16237	1.61543	1.05077	1.0426	0.994938	1.53305		474.786	1.44531	1.68436	1.88333	2.17826	1.41694	1.17424	1.43523	1.31459	1.39319	1.73505	1.58558	2.45767	1.36503	1.63105	2.09752
527.5	1.63401	1.1648	3.85788	2.52371	1.94305	1.20461	1.47702	2.45582	1.27673	1.32805	1.20619	2.4327	1.20821	1.25248	0.970619	1.01434	3.76781	1.6193	1.05764	1.05095	0.997049	1.52336		475.349	1.71782	1.70405	1.86287	2.18024	1.36332	1.1991	1.43423	1.29594	1.38728	1.70811	1.61094	2.32039	1.35365	1.61001	1.93751
528.125	1.70949	1.14066	4.47996	2.60002	1.96943	1.17626	1.52758	2.48476	1.22294	1.31085	1.18974	2.7691	1.25619	1.23218	0.984471	1.00499	3.22716	1.65391	1.0452	1.02124	0.998555	1.49482		475.912	1.99255	1.69581	1.90137	2.10097	1.36726	1.20118	1.44045	1.26944	1.40336	1.69404	1.61462	2.29273	1.36335	1.59127	1.85497
528.75	1.73474	1.14167	4.61871	2.64927	2.31402	1.17058	1.5836	2.53203	1.23731	1.30421	1.24819	2.98772	1.27576	1.18787	0.99598	1.01875	2.93719	1.62824	1.02666	1.0298	1.00008	1.46811		476.476	2.39928	1.6274	1.99069	2.02728	1.38464	1.1636	1.41854	1.25204	1.36629	1.66154	1.61692	2.26849	1.38398	1.60437	1.78306
529.375	1.7928	1.14173	4.34616	2.67603	2.93782	1.18107	1.561	2.60115	1.27694	1.30611	1.37432	2.54561	1.27389	1.1901	0.985039	1.0306	2.94987	1.52583	1.01775	1.04551	1.00464	1.46803		477.039	2.61039	1.64591	2.15778	1.9434	1.42477	1.15546	1.43738	1.23056	1.35796	1.66139	1.6579	2.29084	1.41772	1.64154	1.79393
530	1.67617	1.13491	3.94941	2.075	2.94747	1.21714	1.49092	2.66205	1.35374	1.30108	1.40974	2.22665	1.2779	1.2053	0.986493	1.0352	3.26118	1.49072	1.01744	1.06866	1.00258	1.43672		477.602	2.52597	1.68138	2.26767	1.85783	1.3926	1.1588	1.46991	1.21828	1.36933	1.66072	1.72495	2.33882	1.45018	1.62373	1.80678
530.625	1.57008	1.13829	3.87525	1.74547	2.68462	1.23768	1.44607	2.93839	1.52004	1.29258	1.34278	2.1451	1.26831	1.22005	0.986637	1.03997	3.77389	1.52748	1.03046	1.08825	1.02033	1.44746		478.165	2.45334	1.73422	2.27236	1.8359	1.36616	1.16878	1.46968	1.21139	1.36161	1.6658	1.79081	2.34697	1.48246	1.63166	1.80035
531.25	1.56564	1.14626	3.88882	1.65575	2.13311	1.26175	1.42951	3.31669	1.91899	1.28635	1.27164	2.02945	1.27656	1.23054	0.99063	1.02844	4.22791	1.52946	1.03763	1.0886	1.04998	1.47267		478.728	2.34145	1.72597	2.1363	1.81191	1.35721	1.18467	1.47699	1.21619	1.38677	1.72136	1.83027	2.29529	1.49727	1.65141	1.75074
531.875	1.54622	1.15474	3.99158	1.59298	1.76255	1.33434	1.44001	3.41605	2.43421	1.30239	1.23501	2.08659	1.28277	1.19293	0.994205	1.01286	4.06976	1.492	1.03095	1.09333	1.07212	1.47445		479.292	2.4122	1.80814	1.99373	1.83177	1.3465	1.17756	1.47401	1.2466	1.40421	1.75729	1.83715	2.2408	1.47842	1.61456	1.65114
532.5	1.50617	1.1691	4.23571	1.6569	1.68603	1.40474	1.45017	3.38678	2.34936	1.34237	1.23444	2.24506	1.31887	1.18428	0.99653	1.01265	3.29949	1.45655	1.02234	1.10784	1.08581	1.50454		479.855	2.68931	1.82334	1.83705	1.88881	1.30962	1.17726	1.53221	1.25275	1.40265	1.71861	1.79723	2.16701	1.44855	1.6564	1.64391
533.125	1.45819	1.19611	4.3104	1.74746	1.67623	1.4429	1.43453	3.52422	2.08393	1.37247	1.2908	2.25309	1.35566	1.21624	0.993764	1.02407	2.64848	1.46409	1.01201	1.10855	1.10717	1.49957		480.418	2.78269	1.77347	1.69158	1.97235	1.31421	1.17184	1.53618	1.27233	1.38776	1.72629	1.76128	2.09425	1.45718	1.70122	1.67813
533.75	1.45854	1.20844	4.11657	1.71581	1.68746	1.60291	1.37348	3.44239	2.04316	1.4035	1.33699	2.28106	1.36053	1.22943	0.998292	1.02534	2.41898	1.4973	1.00159	1.10871	1.12315	1.50473		480.981	2.45419	1.721	1.58394	2.16007	1.31868	1.17023	1.49495	1.30214	1.39234	1.73526	1.72613	2.04113	1.4592	1.69123	1.76715
534.375	1.47077	1.20499	3.28524	1.72146	1.72458	1.72851	1.35528	3.2658	2.2818	1.43142	1.36024	2.43589	1.35816	1.21212	0.973721	1.02588	2.3373	1.48999	0.998711	1.12132	1.1883	1.52287		481.545	2.18127	1.6908	1.54991	2.36259	1.32429	1.17	1.48032	1.33632	1.39892	1.73631	1.72879	2.07732	1.45482	1.6977	1.6969
535	1.48079	1.17156	2.92011	1.78369	1.76862	1.76658	1.35936	3.02823	2.64912	1.46878	1.29942	2.51161	1.35253	1.20605	0.973556	1.02039	2.35881	1.44386	1.00211	1.14233	1.23445	1.53527		482.108	2.09352	1.68857	1.5524	2.40871	1.34203	1.17823	1.50035	1.32694	1.4086	1.73243	1.71935	2.14894	1.45648	1.66032	1.6769
535.625	1.48956	1.13575	2.88055	1.7689	1.88019	1.79752	1.36564	2.97923	2.99462	1.51813	1.27425	2.2939	1.37256	1.22369	0.986651	1.01872	2.27235	1.38709	1.00772	1.18985	1.22225	1.56496		482.671	2.08881	1.64935	1.48396	2.43301	1.34738	1.19664	1.53698	1.29519	1.49659	1.70641	1.72912	2.25474	1.43586	1.66734	1.68336
536.25	1.52602	1.11337	2.92701	1.71916	1.96931	1.76771	1.3592	3.03371	3.22889	1.53922	1.44548	1.88087	1.38332	1.25644	1.00177	1.03453	2.21139	1.32436	1.01954	1.21119	1.20528	1.55019		483.234	2.05183	1.68587	1.48656	2.27734	1.36735	1.20793	1.54264	1.25863	1.48742	1.67935	1.71091	2.34881	1.41378	1.67006	1.68099
536.875	1.5986	1.10366	3.0781	1.6898	2.17902	1.72092	1.34825	3.17681	3.42718	1.51972	1.51768	1.61483	1.35024	1.31381	1.00655	1.04445	2.17866	1.27209	1.02575	1.22156	1.16454	1.54511		483.797	2.01687	1.77733	1.51811	2.22658	1.37766	1.22073	1.53919	1.25552	1.47422	1.69019	1.66272	2.34509	1.38712	1.61258	1.6858
537.5	1.65835	1.09823	3.3213	1.64804	2.41774	1.68447	1.37484	3.31649	3.57938	1.48527	1.33994	1.53194	1.34193	1.32543	1.00417	1.04766	2.19415	1.27102	1.01277	1.26893	1.13197	1.57903		484.361	2.02389	1.89162	1.53451	2.25537	1.37312	1.20696	1.49829	1.23436	1.46466	1.73576	1.59113	2.1462	1.36601	1.56824	1.61845
538.125	1.64141	1.08501	3.86896	1.65499	2.58205	1.59315	1.46098	3.40479	3.20968	1.47866	1.25525	1.55828	1.36257	1.26436	0.981458	1.05095	2.25218	1.28562	1.00695	1.37741	1.18172	1.62664		484.924	2.09535	1.94282	1.55429	2.29829	1.34556	1.21289	1.49015	1.20658	1.52961	1.68437	1.57882	1.96372	1.35937	1.52819	1.5809
538.75	1.62394	1.09186	4.48036	1.78293	2.42785	1.53015	1.4854	3.23857	2.82982	1.49685	1.25582	1.59292	1.40298	1.23707	0.972917	1.04235	2.21902	1.28867	1.00705	1.56625	1.20908	1.5952		485.487	2.14459	2.01577	1.55876	2.36074	1.34431	1.21392	1.46961	1.1952	1.62685	1.67721	1.55357	1.92467	1.40929	1.50521	1.57551
539.375	1.64906	1.11153	4.70697	1.98088	2.4331	1.55011	1.44131	3.03016	2.65685	1.5119	1.24907	1.57645	1.44522	1.25506	0.973657	1.00712	2.17464	1.30045	1.00223	1.50313	1.19161	1.51452		486.05	2.17975	2.00959	1.55606	2.41558	1.36162	1.21774	1.46309	1.19489	1.69094	1.62541	1.51374	1.94672	1.40377	1.46991	1.60258
540	1.64675	1.13129	4.64296	2.00501	2.43671	1.53978	1.40935	2.87575	2.65569	1.48668	1.24948	1.57997	1.4545	1.25386	0.980548	0.984404	2.28799	1.33801	1.00385	1.37811	1.20259	1.46182		486.613	2.14513	2.03889	1.52523	2.32953	1.39291	1.23243	1.46869	1.19184	1.65779	1.64598	1.50289	1.96172	1.36739	1.44644	1.61688
540.625	1.5726	1.17081	4.31307	1.9928	2.47253	1.56442	1.40913	2.84088	2.6283	1.43972	1.21265	1.6523	1.44313	1.24681	0.99166	0.991118	2.27074	1.38194	1.00804	1.28125	1.25373	1.46806		487.177	2.14573	2.09616	1.50511	2.24057	1.3895	1.25303	1.49131	1.19352	1.57238	1.66597	1.47914	1.95213	1.33941	1.45531	1.61047
541.25	1.47329	1.22265	3.8721	2.13762	2.55969	1.62038	1.4408	2.90854	2.48643	1.3895	1.19181	1.70952	1.46268	1.22162	0.987845	0.996622	2.18084	1.39753	1.00546	1.17735	1.28752	1.46557		487.74	2.1466	2.14426	1.46698	2.22752	1.3474	1.27678	1.48555	1.18509	1.51933	1.64959	1.49577	1.93792	1.33137	1.46623	1.61613
541.875	1.41483	1.25004	3.87773	2.11296	2.64623	1.61807	1.4316	2.94662	2.29138	1.36044	1.21391	1.66022	1.52957	1.21731	0.983669	0.988172	2.14088	1.40261	1.00635	1.11822	1.23929	1.48689		488.303	2.1228	2.37585	1.4456	2.23079	1.34203	1.28989	1.51436	1.19497	1.48107	1.603	1.51414	1.88767	1.36786	1.45165	1.59933
542.5	1.43338	1.23551	3.83568	1.88026	2.44946	1.61405	1.39802	2.83108	2.17712	1.33924	1.2799	1.58991	1.6032	1.26066	0.978413	0.994014	2.22526	1.36521	1.00424	1.1007	1.16954	1.48206		488.866	2.10756	2.73825	1.44873	2.34959	1.34917	1.31486	1.48032	1.19461	1.521	1.62939	1.49759	1.83092	1.3943	1.47136	1.58953
543.125	1.49015	1.21559	3.48408	1.78553	2.20362	1.66298	1.36013	2.61434	2.13104	1.32455	1.34929	1.46856	1.64602	1.31961	0.970561	1.01699	2.5656	1.3314	1.00354	1.08552	1.12943	1.50876		489.429	2.16803	3.06506	1.42902	2.44491	1.32906	1.31205	1.4461	1.19609	1.57127	1.66521	1.53288	1.82065	1.3969	1.48348	1.60584
543.75	1.58721	1.19587	2.96732	1.91818	2.05344	1.72662	1.34023	2.51818	2.07032	1.31179	1.37597	1.35521	1.65567	1.41413	0.956489	1.0274	2.86606	1.32111	1.00203	1.06762	1.0936	1.51743		489.993	2.16252	3.71095	1.44643	2.4772	1.36252	1.32162	1.41202	1.19908	1.6089	1.67991	1.53952	1.87069	1.3938	1.4849	1.66196
544.375	1.74635	1.19581	2.77095	2.0338	1.86246	1.7107	1.31636	2.57731	2.02695	1.32338	1.33964	1.25997	1.64243	1.48122	0.950146	1.02572	3.12213	1.33447	1.0053	1.06647	1.08372	1.48423		490.556	2.26472	4.39452	1.43137	2.41617	1.35019	1.34561	1.40628	1.19602	1.70767	1.67022	1.49759	1.87436	1.39023	1.46698	1.66685
545	1.98933	1.22919	2.87945	2.02375	1.75436	1.68996	1.32742	2.59555	2.01516	1.32776	1.31886	1.21426	1.64653	1.57341	0.956583	1.02601	3.09135	1.3589	1.01332	1.08018	1.07757	1.46678		491.119	2.40919	4.58126	1.44653	2.36082	1.37408	1.34739	1.4357	1.22307	1.82253	1.63664	1.5193	1.85895	1.38111	1.45012	1.64391
545.625	2.42165	1.2684	2.82297	2.09713	1.83168	1.68819	1.34736	2.56931	2.04339	1.29199	1.29307	1.17519	1.67636	1.6376	0.949464	1.03569	2.70498	1.40291	1.01029	1.08458	1.08117	1.50502		491.682	2.60302	4.60412	1.47049	2.30919	1.37527	1.35823	1.49337	1.24071	1.88728	1.63957	1.60054	1.87193	1.37463	1.49202	1.6265
546.25	2.96288	1.2865	2.66492	2.07358	2.01344	1.71594	1.3825	2.58363	2.05404	1.26026	1.27861	1.24232	1.71623	1.61355	0.933299	1.03613	2.29697	1.46733	1.00877	1.10197	1.06434	1.48169		492.246	2.86243	5.05269	1.50028	2.33244	1.3716	1.38988	1.50851	1.24065	1.96017	1.65574	1.71672	1.86268	1.3839	1.49394	1.59606
546.875	3.43027	1.28701	2.47776	1.97052	2.33416	1.73878	1.45517	2.58907	2.11234	1.23454	1.28117	1.25928	1.76998	1.52275	0.9469	1.01382	2.07028	1.49082	1.01881	1.09654	1.03894	1.47114		492.809	3.14259	5.3641	1.44339	2.38744	1.36303	1.40204	1.54718	1.23794	2.01474	1.66542	1.78504	1.88755	1.40301	1.44125	1.58378
547.5	3.77474	1.27425	2.38687	1.99087	2.67794	1.73115	1.56893	2.63957	2.23447	1.21264	1.33543	1.20736	1.84076	1.46753	0.954283	0.995639	1.94907	1.46025	1.0272	1.1114	1.0308	1.47724		493.372	3.32966	5.30372	1.40784	2.35743	1.33912	1.41208	1.57543	1.23556	1.99897	1.71709	1.72891	1.89783	1.43244	1.39672	1.6034
548.125	3.82819	1.29014	2.26943	2.44344	2.91246	1.67733	1.60175	2.76664	2.33404	1.21168	1.39583	1.16504	1.93168	1.44568	0.947429	0.991706	1.90777	1.47725	1.03218	1.10299	1.0419	1.47273		493.935	3.81995	4.40658	1.36752	2.3286	1.34089	1.43316	1.56478	1.23472	1.95645	1.73149	1.60855	1.93125	1.43724	1.40114	1.62744
548.75	3.5893	1.33761	2.29255	2.59668	3.0867	1.65153	1.52712	2.80895	2.42329	1.22408	1.37535	1.13486	2.05238	1.4016	0.953739	1.00711	1.8971	1.48451	1.03708	1.13845	1.07556	1.50368		494.498	4.30071	3.61603	1.32112	2.28945	1.34026	1.45693	1.51503	1.23074	1.92157	1.72737	1.53578	2.00572	1.42106	1.45735	1.64715
549.375	3.30312	1.37476	2.37018	2.49091	3.61478	1.63027	1.50661	2.80487	2.36201	1.22968	1.3428	1.12199	2.14678	1.40952	0.95722	1.00044	1.87668	1.46186	1.0309	1.14457	1.09199	1.50302		495.062	4.61291	3.1594	1.34361	2.19725	1.33451	1.47299	1.49369	1.23958	1.82673	1.73043	1.51158	2.0991	1.41668	1.48987	1.66894
550	3.45303	1.37493	2.43931	2.47684	4.31163	1.70141	1.51459	2.83914	2.12062	1.25722	1.32143	1.11255	2.28758	1.40555	0.956393	0.980767	1.91825	1.45324	1.02202	1.13739	1.11478	1.47589		495.625	4.76056	2.97319	1.32113	2.1427	1.31984	1.47063	1.46665	1.23183	1.70673	1.71027	1.55804	2.19202	1.40327	1.47509	1.71655
550.625	3.51295	1.31439	2.60574	2.33038	4.63777	1.83166	1.51497	2.86871	1.89863	1.30471	1.33952	1.1176	2.47645	1.36088	0.954852	0.980061	1.97282	1.455	1.02368	1.09279	1.09036	1.49795		496.188	5.01259	2.88689	1.28946	2.05877	1.32872	1.44742	1.47571	1.22498	1.65471	1.73426	1.56875	2.23503	1.4167	1.45493	1.78741
551.25	3.68394	1.2694	2.65115	2.29783	3.89353	1.99404	1.46892	2.98428	1.77549	1.31467	1.37117	1.10907	2.77941	1.28027	0.966595	0.972622	2.05461	1.41294	1.02985	1.05847	1.0879	1.49938		496.751	5.06081	2.89223	1.28274	2.01886	1.32745	1.4375	1.48593	1.21051	1.64547	1.69643	1.59075	2.17327	1.4314	1.43597	1.86443
551.875	3.89135	1.26727	2.62047	2.18767	3.01624	2.05129	1.41321	3.21242	1.73036	1.28729	1.35048	1.12382	3.11634	1.20636	0.955516	0.971792	2.07234	1.32052	1.02103	1.03534	1.07083	1.54053		497.314	4.81193	2.88453	1.31409	1.97379	1.32219	1.41568	1.48328	1.21512	1.61652	1.70496	1.59628	2.093	1.43079	1.44495	1.80497
552.5	3.77469	1.28504	2.56891	2.10886	2.35328	2.04252	1.36985	3.26593	1.7099	1.27546	1.31796	1.11421	3.11802	1.16257	0.953374	0.970796	2.19044	1.25645	1.01817	1.01546	1.09343	1.51632		497.878	4.43199	2.94858	1.31745	1.95855	1.29171	1.40047	1.49259	1.22781	1.65271	1.72473	1.61643	1.9778	1.46435	1.46528	1.7307
553.125	3.50771	1.32574	2.59606	2.22209	2.36765	1.96774	1.33969	3.3016	1.66005	1.28559	1.31708	1.07455	2.81718	1.10481	0.959445	0.979101	2.16337	1.24686	1.01779	1.00815	1.10644	1.49332		498.441	4.09675	3.10678	1.31771	1.99067	1.31895	1.38191	1.4939	1.22691	1.74143	1.6996	1.64236	1.88537	1.48647	1.49475	1.70491
553.75	3.41205	1.34182	2.76544	2.2039	2.22926	2.00606	1.34088	3.45219	1.62207	1.30617	1.33573	1.06263	2.62701	1.09706	0.970107	0.992369	2.14545	1.24632	1.01775	1.02481	1.08999	1.49216		499.004	3.70998	3.19175	1.35536	2.05865	1.30751	1.36208	1.5349	1.20944	1.85911	1.63288	1.69634	1.83194	1.50382	1.51979	1.70509
554.375	3.34603	1.3188	3.01018	2.12016	2.21919	2.24346	1.37266	3.43738	1.6184	1.31007	1.36227	1.05704	2.63076	1.14131	0.967688	0.988192	2.21989	1.2375	1.02005	1.0075	1.08231	1.53113		499.567	3.34726	3.21881	1.33623	2.20227	1.30456	1.36538	1.53204	1.2057	1.86254	1.6166	1.70927	1.79626	1.49246	1.50758	1.65051
555	3.03327	1.28519	3.23546	2.12223	2.22199	2.77211	1.42171	3.39081	1.6298	1.29301	1.34385	1.07389	2.77334	1.16112	0.977252	0.986333	2.35995	1.22889	1.01968	1.00277	1.07323	1.54317		500.13	3.11704	3.2806	1.33697	2.29868	1.31145	1.3694	1.52956	1.20914	1.88609	1.61021	1.65278	1.80061	1.48701	1.52748	1.60314
555.625	2.84027	1.28053	3.53543	2.26824	2.25423	3.00481	1.49362	3.32734	1.68285	1.28182	1.26864	1.10966	3.06824	1.14789	0.968446	0.987722	2.5695	1.24685	1.0271	1.01045	1.07554	1.53182		500.694	3.31577	3.17603	1.33772	2.39045	1.32603	1.35904	1.56482	1.20771	2.0696	1.61118	1.61995	1.82547	1.49695	1.54194	1.55078
556.25	2.55369	1.28773	4.11775	2.48013	2.42386	2.63555	1.57923	3.18933	1.74832	1.28505	1.22477	1.11862	3.57667	1.12716	0.984023	0.984605	2.71181	1.32339	1.04093	1.05704	1.10609	1.54552		501.257	3.84842	2.98134	1.31737	2.45438	1.34751	1.36287	1.5918	1.20795	2.2124	1.57544	1.63106	1.84489	1.49723	1.52469	1.54112
556.875	2.23412	1.28502	4.8871	2.41979	2.52692	2.21083	1.65182	2.99355	1.80264	1.29495	1.24341	1.10918	3.91605	1.12277	0.980946	0.981313	2.74511	1.3919	1.04079	1.03904	1.11046	1.56394		501.82	4.60689	2.88213	1.33644	2.44902	1.35789	1.3724	1.57743	1.21671	2.11342	1.60325	1.64948	1.84617	1.50537	1.49288	1.56788
557.5	2.00593	1.27517	5.90739	2.05042	2.48993	1.9374	1.5778	2.82956	1.90662	1.3415	1.2379	1.12392	3.69333	1.12126	0.973896	1.00983	2.70358	1.39571	1.03942	1.03604	1.10524	1.59917		502.383	5.14805	2.87308	1.34296	2.34748	1.35896	1.37866	1.52823	1.20856	1.93435	1.61162	1.66485	1.8827	1.51351	1.46754	1.57492
558.125	1.87596	1.24317	6.92559	1.86932	2.48351	1.83722	1.43706	2.81427	2.10831	1.40652	1.20402	1.13106	3.30419	1.06969	0.991337	1.02261	3.07574	1.37377	1.04693	1.03807	1.10867	1.69181		502.947	5.01157	2.90401	1.36383	2.29249	1.34541	1.36896	1.5074	1.1727	1.81891	1.64799	1.68418	1.9096	1.48779	1.52642	1.59969
558.75	1.80324	1.21259	7.42574	1.82361	2.43497	1.75075	1.34118	2.91702	2.43885	1.43794	1.20579	1.15464	2.93662	1.07151	1.0081	1.01689	3.29523	1.38783	1.05467	1.00621	1.12835	1.71631		503.51	4.14737	2.99299	1.35334	2.24468	1.33753	1.37756	1.48595	1.1429	1.80483	1.63032	1.66923	1.86637	1.48579	1.56929	1.64216
559.375	1.66045	1.19721	6.72325	1.8042	2.51456	1.67094	1.30441	2.975	2.57777	1.41042	1.21923	1.13932	2.59808	1.08928	0.994497	1.0124	3.45767	1.42288	1.05248	0.986932	1.11883	1.73112		504.073	3.44975	3.18309	1.34286	2.16027	1.31771	1.39731	1.48892	1.14601	1.74466	1.60717	1.62491	1.80208	1.5289	1.51614	1.595
560	1.59913	1.19637	5.37818	1.76369	2.54259	1.58062	1.31188	3.00328	2.50194	1.37441	1.2355	1.13619	2.32741	1.0819	0.98317	1.00226	3.33163	1.42256	1.03933	0.992344	1.08886	1.6911		504.636	2.96932	3.27345	1.31525	2.08514	1.29977	1.37786	1.47569	1.14381	1.70093	1.60493	1.5647	1.75255	1.52633	1.49942	1.55253
560.625	1.58631	1.19213	4.27276	1.76434	2.66413	1.52012	1.34928	2.99108	2.26346	1.33764	1.21354	1.14822	2.18314	1.07389	0.979627	0.989645	2.55503	1.38998	1.03219	0.987862	1.0625	1.68937		505.199	2.61442	3.36297	1.31005	2.11875	1.33821	1.37099	1.45756	1.15537	1.67196	1.57482	1.54235	1.72614	1.51927	1.48192	1.54059
561.25	1.64945	1.18118	3.62447	1.78569	2.74431	1.50467	1.38789	3.18922	2.11558	1.31039	1.19494	1.13568	2.14955	1.08119	0.973284	0.988151	2.16503	1.38726	1.0404	0.982996	1.05917	1.59373		505.763	2.32376	3.5773	1.31558	2.17032	1.36825	1.38046	1.47041	1.15623	1.64274	1.55805	1.4742	1.73096	1.50098	1.49322	1.55679
561.875	1.76666	1.16666	3.22527	1.79245	2.63142	1.48212	1.38916	3.30283	2.08197	1.30063	1.16435	1.14003	2.12583	1.08381	0.989916	0.982254	2.04535	1.40762	1.05086	0.97732	1.07464	1.53245		506.326	2.08011	3.63897	1.29473	2.1609	1.32577	1.38075	1.48029	1.17074	1.61332	1.57835	1.43253	1.74162	1.49854	1.47152	1.56928
562.5	1.86016	1.16719	3.19968	1.84426	2.66703	1.49202	1.4053	3.18053	2.02058	1.30203	1.16775	1.15139	2.06931	1.07911	0.97955	0.981292	2.00912	1.44895	1.05353	0.99082	1.08278	1.56728		506.889	1.97823	3.75273	1.28929	2.1194	1.35234	1.35555	1.49909	1.17422	1.63783	1.58812	1.40375	1.75718	1.51108	1.49516	1.57865
563.125	1.9035	1.19338	3.26628	1.88891	2.75768	1.44365	1.43409	3.10318	1.95084	1.29525	1.20147	1.14606	1.97688	1.07269	0.967807	0.985289	2.02258	1.51396	1.05736	0.999137	1.08895	1.57867		507.452	2.07649	3.97693	1.2996	2.09113	1.36486	1.36225	1.46501	1.18147	1.63047	1.59815	1.40444	1.77575	1.50651	1.50963	1.58596
563.75	1.9276	1.22173	3.24712	1.96639	2.73501	1.43422	1.44342	3.15664	1.96866	1.29105	1.23829	1.13437	1.85983	1.06836	0.97034	0.987563	2.10963	1.57028	1.05665	0.99173	1.087	1.60225		508.015	2.13706	4.32982	1.31776	2.24382	1.31467	1.36139	1.49234	1.18655	1.70854	1.56974	1.37951	1.7697	1.48277	1.53288	1.58672
564.375	1.92013	1.23542	2.98111	2.13151	2.75404	1.47353	1.4291	3.17241	1.97975	1.29391	1.27853	1.10818	1.75598	1.0576	0.965932	0.987369	2.04289	1.5854	1.05337	1.00294	1.07903	1.70609		508.579	2.29391	5.03628	1.31876	2.39768	1.29716	1.34698	1.57228	1.1769	1.82198	1.56389	1.3551	1.75477	1.46192	1.50417	1.58775
565	1.86811	1.26251	2.34778	2.40212	2.71312	1.52961	1.41983	3.28655	1.98512	1.29397	1.29242	1.10027	1.7015	1.06391	0.970732	0.977295	2.03558	1.57882	1.05503	0.996457	1.04271	1.72839		509.142	2.16928	5.73402	1.30217	2.4708	1.27924	1.33267	1.55004	1.18094	1.95384	1.59578	1.30494	1.79377	1.46763	1.46949	1.57589
565.625	1.78587	1.28044	1.88675	2.5468	2.59405	1.57396	1.4508	3.50925	1.98206	1.30645	1.30284	1.10828	1.66619	1.09227	0.980398	0.981921	2.06349	1.53183	1.05431	1.01645	1.0417	1.66635		509.705	2.12263	5.92689	1.28577	2.45275	1.28385	1.31475	1.5362	1.17615	1.94812	1.62098	1.3077	1.83718	1.47988	1.47195	1.58729
566.25	1.70901	1.28134	1.70424	2.46469	2.52001	1.68078	1.50225	3.48548	1.8819	1.31109	1.31869	1.12376	1.624	1.08217	0.972488	0.989092	2.07158	1.49491	1.05181	1.00611	1.04637	1.7065		510.268	2.09844	5.435	1.32871	2.4357	1.28714	1.31903	1.56694	1.16493	1.78811	1.62893	1.30025	1.85839	1.48984	1.45782	1.54826
566.875	1.60974	1.25878	1.67264	2.35253	2.46062	1.87478	1.53561	3.36451	1.84521	1.31366	1.26522	1.14816	1.57656	1.07295	0.950006	0.988856	2.00508	1.46633	1.06254	0.98128	1.05386	1.68844		510.831	2.00243	4.79208	1.29862	2.47987	1.3027	1.32497	1.56555	1.16189	1.6999	1.63611	1.27489	1.84132	1.49355	1.44698	1.52995
567.5	1.54373	1.23983	1.70212	2.15173	2.46605	2.00813	1.63094	3.36539	1.90495	1.31537	1.22446	1.19961	1.56386	1.04514	0.943836	0.98251	1.94001	1.42232	1.08022	0.993579	1.02938	1.611		511.395	2.00274	4.30875	1.27655	2.5284	1.28358	1.34749	1.58025	1.15954	1.65948	1.60527	1.30681	1.8295	1.5027	1.41732	1.51381
568.125	1.49956	1.23491	1.71179	2.04294	2.48525	2.0722	1.79572	3.27636	1.99143	1.30485	1.21976	1.24932	1.56782	1.03224	0.952395	0.97083	1.93636	1.35796	1.08294	1.02088	1.01602	1.56602		511.958	1.92217	3.91619	1.27586	2.60094	1.27405	1.34935	1.58496	1.15498	1.59551	1.58764	1.29697	1.84049	1.51544	1.39708	1.49082
568.75	1.54998	1.25872	1.74051	2.10401	2.4163	2.17165	1.94772	3.13098	1.9885	1.30657	1.23166	1.27029	1.56141	1.03504	0.992924	0.97843	1.96428	1.30819	1.07429	1.02978	1.01421	1.57634		512.521	1.85761	3.53572	1.27383	2.65976	1.26584	1.344	1.62331	1.15478	1.52416	1.58317	1.31604	1.88389	1.53014	1.40629	1.44539
569.375	1.60718	1.28226	1.77686	2.23288	2.48262	2.18354	2.08397	3.00263	2.00936	1.30398	1.23562	1.31052	1.57793	1.0531	0.982689	0.97986	1.96682	1.31271	1.06774	1.04062	1.03043	1.60714		513.084	1.83991	3.21002	1.27013	2.74938	1.25033	1.31578	1.63297	1.15246	1.46534	1.57654	1.29549	1.88145	1.5401	1.42533	1.44111
570	1.64309	1.31667	1.7766	2.27311	2.63063	2.06533	2.21795	2.86183	2.04746	1.29782	1.23564	1.39167	1.61443	1.04307	0.953064	0.983463	1.99842	1.32074	1.05804	1.02631	1.05706	1.59496		513.647	1.87649	3.08053	1.30295	2.69487	1.2847	1.31728	1.63853	1.15882	1.45277	1.60839	1.28738	1.82081	1.50264	1.39318	1.45658
570.625	1.70195	1.34949	1.74134	2.11196	2.74916	1.99088	2.39222	2.66932	2.14718	1.31951	1.239	1.55346	1.65912	1.03056	0.956526	0.993799	2.07402	1.32503	1.05827	1.02024	1.07117	1.54372		514.211	1.8866	3.01352	1.34794	2.57055	1.32861	1.29749	1.76745	1.17195	1.40676	1.64681	1.29968	1.83378	1.47582	1.36759	1.47509
571.25	1.7482	1.35325	1.64279	1.93515	2.82771	2.04718	2.21043	2.54674	2.16453	1.35087	1.23826	1.70023	1.69998	1.03143	0.95722	0.992342	2.12444	1.33594	1.06781	1.03702	1.06476	1.56392		514.774	1.8558	3.11198	1.31018	2.48021	1.30194	1.27175	1.99652	1.18391	1.43739	1.62671	1.27821	1.84589	1.46866	1.36615	1.50991
571.875	1.79572	1.36628	1.62	1.84168	2.78163	2.17855	1.9598	2.51024	2.13742	1.35753	1.25973	1.81018	1.74318	1.04253	0.947044	0.982026	2.21683	1.31198	1.08063	1.0766	1.03787	1.54477		515.337	1.88066	3.25418	1.31764	2.40473	1.30503	1.2414	2.05096	1.19027	1.46877	1.61842	1.25044	1.82215	1.46964	1.37245	1.50329
572.5	1.80049	1.4239	1.65029	1.85312	2.79748	1.96021	1.93837	2.49396	2.01627	1.35241	1.33215	1.61446	1.79303	1.04915	0.945275	0.971045	2.30176	1.28219	1.08473	1.08989	1.06602	1.57387		515.9	1.96964	3.44545	1.32583	2.30464	1.2992	1.23292	1.91869	1.20826	1.5234	1.58851	1.28218	1.81548	1.4709	1.37893	1.51431
573.125	1.70744	1.46009	1.67462	1.83284	2.81379	1.90398	1.92397	2.52306	1.91608	1.36026	1.31627	1.46442	1.81917	1.05761	0.95266	0.967277	2.52394	1.27223	1.08966	1.06536	1.0569	1.5992		516.464	2.12154	3.42936	1.34425	2.24434	1.30156	1.23703	1.81738	1.22699	1.58402	1.62361	1.31269	1.79277	1.46663	1.36546	1.5875
573.75	1.57889	1.4647	1.6813	1.74862	2.90967	1.91759	1.84138	2.60295	2.01219	1.35431	1.28433	1.39788	1.80396	1.08487	0.964922	0.955115	2.72886	1.29917	1.09582	1.06812	1.08883	1.58742		517.027	2.2521	3.21838	1.3435	2.18806	1.34616	1.2026	1.74635	1.2267	1.61457	1.61364	1.28486	1.75417	1.47044	1.36201	1.65421
574.375	1.54396	1.42439	1.64807	1.75346	2.95614	1.99881	1.77404	2.77393	2.13725	1.34267	1.29647	1.38531	1.75743	1.06926	0.973707	0.953842	2.88533	1.31525	1.09434	1.06748	1.07742	1.57313		517.59	2.14822	2.89035	1.34865	2.1042	1.37643	1.20105	1.65361	1.24667	1.63338	1.58052	1.25558	1.74771	1.47247	1.37668	1.70681
575	1.6046	1.37788	1.64315	1.82756	2.7324	2.15091	1.79404	3.07131	2.16794	1.32139	1.28237	1.4099	1.68528	1.07175	0.992443	0.957411	3.07996	1.33924	1.08557	1.03289	1.05412	1.53529		518.153	2.06004	2.71884	1.36933	2.05998	1.35711	1.20956	1.59937	1.24589	1.69419	1.55016	1.21677	1.74486	1.48049	1.41787	1.71657
575.625	1.6206	1.37936	1.65339	1.92138	2.5346	2.18079	1.91595	3.3374	2.16929	1.29708	1.25225	1.39487	1.60001	1.07008	1.01295	0.956747	3.07217	1.35531	1.07606	1.04393	1.03619	1.54436		518.716	1.96918	2.78508	1.35412	2.07418	1.35323	1.22266	1.57924	1.22573	1.7607	1.55251	1.20436	1.7424	1.50373	1.43153	1.74252
576.25	1.60534	1.38468	1.60163	2.03307	2.52804	2.17614	1.98541	3.29526	2.107	1.25589	1.21565	1.3825	1.55062	1.0676	1.01369	0.961538	2.9025	1.3547	1.08296	1.07916	1.04588	1.59918		519.28	1.95755	2.90497	1.37451	2.06895	1.3028	1.23853	1.56221	1.22541	1.71545	1.5537	1.21595	1.71451	1.52709	1.43625	1.74726
576.875	1.62327	1.45239	1.55989	1.90533	2.49814	2.16351	1.90033	3.10063	1.99411	1.22075	1.21999	1.35441	1.54289	1.05334	1.00185	0.970541	2.75814	1.34001	1.08762	1.05297	1.05352	1.59683		519.843	2.07268	3.13055	1.35445	2.05798	1.2696	1.25825	1.56682	1.22579	1.73926	1.56716	1.23761	1.69067	1.51087	1.44379	1.75938
577.5	1.78783	1.51928	1.56139	1.86377	2.62697	2.18447	1.73905	2.9005	1.92295	1.20019	1.23756	1.3454	1.60995	1.05597	0.992393	0.980193	2.49585	1.3232	1.08644	1.02259	1.06686	1.67012		520.406	2.27976	3.24292	1.38691	2.00858	1.29052	1.26845	1.59863	1.225	1.75552	1.59279	1.25419	1.6503	1.50837	1.4467	1.67501
578.125	1.77443	1.5415	1.57452	1.84529	2.72749	2.12898	1.66352	2.80932	1.9524	1.18353	1.24583	1.34945	1.73096	1.05992	0.980712	0.990778	2.30158	1.29798	1.07626	1.03603	1.08375	1.67798		520.969	2.20584	3.28301	1.3936	2.06459	1.28119	1.27806	1.5747	1.22313	1.87533	1.5543	1.28855	1.6247	1.55076	1.4485	1.59413
578.75	1.81709	1.49344	1.59785	1.90793	2.86579	2.09874	1.60261	2.87625	1.99498	1.18491	1.23449	1.39207	1.74048	1.068	0.958976	0.987349	2.17855	1.31176	1.07884	1.03296	1.09785	1.63946		521.532	2.08543	3.50647	1.39749	2.16104	1.297	1.28641	1.59694	1.223	1.91769	1.53023	1.31045	1.6061	1.58589	1.39952	1.56915
579.375	2.06163	1.41238	1.63355	1.97734	3.00369	2.05579	1.55652	2.94956	1.96613	1.20397	1.23898	1.4232	1.58251	1.06387	0.965268	0.973174	2.20109	1.34765	1.08126	1.04115	1.07488	1.61184		522.096	2.05914	3.61468	1.4076	2.28651	1.27605	1.29092	1.57665	1.22012	1.9473	1.54665	1.27308	1.59086	1.5804	1.40617	1.55298
580	2.35074	1.30851	1.65979	1.95353	3.0438	2.01761	1.59293	2.95544	1.89563	1.22531	1.27244	1.45099	1.40819	1.07051	0.977864	0.960341	2.17795	1.36211	1.07629	1.04151	1.06422	1.63452		522.659	2.12953	3.33304	1.43909	2.44693	1.28539	1.31218	1.58408	1.22852	2.15688	1.5552	1.24663	1.61589	1.56859	1.38043	1.54705
580.625	2.70201	1.25587	1.63458	1.96661	3.0321	2.08382	1.68724	2.87146	1.89792	1.22137	1.26164	1.48484	1.30382	1.06894	0.998759	0.968044	2.09947	1.32716	1.07463	1.0638	1.0518	1.65869		523.222	2.15666	3.17164	1.51244	2.52154	1.30063	1.30955	1.63372	1.23587	2.25977	1.58355	1.22161	1.62905	1.55492	1.3678	1.54234
581.25	2.26947	1.24548	1.62244	1.98971	3.03428	2.06647	1.79042	2.74695	1.90358	1.20989	1.25266	1.48887	1.2542	1.07897	0.996682	0.978645	2.20079	1.27832	1.07072	1.08421	1.04667	1.64694		523.785	2.19063	3.18065	1.58196	2.51208	1.29796	1.29479	1.69724	1.24398	2.20712	1.5953	1.16725	1.5915	1.50093	1.37912	1.60013
581.875	1.83024	1.25216	1.66047	2.01745	2.71209	1.99727	1.88206	2.77238	1.81943	1.20748	1.27485	1.44092	1.24633	1.08466	0.978558	0.99324	2.51994	1.28292	1.0807	1.07319	1.04952	1.62488		524.348	2.17462	3.02093	1.6795	2.50161	1.29457	1.27511	1.76555	1.29336	2.11251	1.58912	1.16722	1.5707	1.46018	1.37985	1.64325
582.5	1.60271	1.26712	1.69444	2.24724	2.43994	1.95147	1.97091	2.918	1.74383	1.23091	1.27208	1.42853	1.24679	1.08173	0.986587	0.992472	2.90071	1.30556	1.09021	1.05413	1.04297	1.56618		524.912	2.33478	2.94524	1.75109	2.43114	1.25714	1.25584	1.78645	1.34952	1.88425	1.55658	1.19334	1.57388	1.44584	1.34668	1.80494
583.125	1.53066	1.29133	1.67363	2.60249	2.36963	1.95887	1.99039	3.14645	1.7535	1.2463	1.22339	1.53944	1.23159	1.11561	0.986695	0.990509	3.37657	1.33201	1.09083	1.06588	1.03002	1.58893		525.475	2.56306	2.95703	1.73735	2.32995	1.27343	1.25941	1.9045	1.34071	1.79796	1.58996	1.21161	1.58405	1.46812	1.34067	1.99789
583.75	1.49487	1.31908	1.61759	2.42763	2.41605	1.90607	1.98138	3.25519	1.7635	1.24223	1.19206	1.72674	1.21181	1.14296	0.974023	1.0015	3.24438	1.3355	1.085	1.06825	1.02338	1.64539		526.038	2.66859	2.80137	1.76522	2.30888	1.28423	1.25982	2.02306	1.29472	1.82438	1.58953	1.22496	1.60412	1.51161	1.36216	2.09736
584.375	1.43238	1.34234	1.66524	2.18015	2.45339	1.88077	1.96414	3.12465	1.81025	1.2186	1.18254	1.81994	1.17764	1.15064	0.970928	1.01185	2.71134	1.32678	1.08558	1.07414	1.0258	1.72702		526.601	2.47089	2.83929	1.82826	2.33739	1.26755	1.26318	2.06109	1.23905	1.88598	1.60451	1.20981	1.61778	1.54895	1.3794	2.01818
585	1.38034	1.32235	1.77846	2.0365	2.62957	1.91132	1.99109	2.78705	1.81291	1.19788	1.17249	1.66498	1.13805	1.14725	0.980327	1.00735	2.52175	1.2952	1.09342	1.071	1.0442	1.71728		527.165	2.24573	2.96819	1.8744	2.35711	1.27942	1.27064	2.16206	1.19933	1.82925	1.62583	1.18204	1.63817	1.54727	1.42551	2.04543
585.625	1.34913	1.2802	1.9135	1.92631	2.77894	1.93257	2.09772	2.63481	1.83975	1.20127	1.15433	1.50673	1.11674	1.1474	0.984781	0.992951	2.4407	1.27562	1.10114	1.04811	1.05406	1.70678		527.728	2.07557	3.12816	1.87677	2.34746	1.30083	1.27595	2.34307	1.17185	1.84523	1.64342	1.20591	1.66228	1.52979	1.4512	2.07067
586.25	1.33764	1.21978	2.01214	1.86908	2.63935	2.06131	2.24821	2.60773	1.83205	1.22403	1.16135	1.48931	1.11228	1.15421	0.985514	0.986368	2.40979	1.29368	1.09647	1.03649	1.04925	1.64046		528.291	1.98193	3.37996	1.90678	2.20872	1.33827	1.28894	2.51278	1.17408	1.83339	1.60985	1.20913	1.69452	1.5198	1.38923	2.06342
586.875	1.36167	1.18588	2.03164	1.93094	2.45821	2.15159	2.18868	2.71631	1.80567	1.21754	1.18693	1.45131	1.10499	1.18133	0.963405	0.984079	2.3177	1.33218	1.09335	1.04545	1.04925	1.66185		528.854	1.90535	3.78692	1.91524	2.00979	1.32015	1.30334	2.69434	1.19945	1.84819	1.63236	1.25709	1.6949	1.52388	1.36661	1.99044
587.5	1.40444	1.222	2.01421	2.13261	2.64082	2.14992	2.09429	2.86101	1.75294	1.20026	1.20075	1.41854	1.10807	1.174	0.955079	0.986762	2.26525	1.3304	1.09958	1.06852	1.05174	1.68895		529.417	1.81418	4.38466	1.94005	1.87838	1.32186	1.30147	2.53915	1.19782	1.74351	1.61312	1.20932	1.68855	1.52914	1.38511	1.89529
588.125	1.45781	1.35149	1.97844	2.27157	2.81495	2.19373	2.10536	2.99626	1.72167	1.18982	1.18816	1.40364	1.13126	1.19431	0.950114	0.975014	2.29771	1.30675	1.09968	1.07813	1.03382	1.73855		529.981	1.73593	4.90354	1.93738	1.92312	1.31966	1.28621	2.28538	1.19618	1.69816	1.59394	1.17937	1.6682	1.53024	1.4183	1.80037
588.75	1.41342	1.66546	1.89947	2.17883	2.59985	2.16714	2.05565	3.13385	1.72358	1.1925	1.18615	1.3911	1.13954	1.20574	0.958958	0.976971	2.51367	1.32058	1.10429	1.08709	1.03337	1.75505		530.544	1.67417	5.40552	1.97254	2.03652	1.33706	1.26108	2.12119	1.20896	1.68923	1.58657	1.20153	1.63939	1.53662	1.44369	1.74433
589.375	1.3291	2.23819	1.8319	2.0184	2.21306	2.04828	1.89442	3.0669	1.72054	1.19813	1.19889	1.31402	1.12196	1.17311	0.981623	0.998385	2.59404	1.32286	1.10722	1.09541	1.04331	1.7039		531.107	1.57158	5.13226	1.95975	2.20763	1.33073	1.26836	2.09722	1.20358	1.77635	1.59333	1.24368	1.61692	1.52985	1.41591	1.73396
590	1.30823	2.63151	1.84301	1.9718	2.02026	1.96278	1.75578	2.96999	1.6781	1.20576	1.20741	1.27274	1.10276	1.19662	0.99312	1.018	2.47222	1.32753	1.10682	1.10307	1.0425	1.54934		531.67	1.49304	4.30745	1.95589	2.23194	1.34426	1.30151	2.07216	1.19582	1.94545	1.62231	1.27307	1.58987	1.51145	1.38217	1.73103
590.625	1.30981	2.67163	1.89082	2.03623	1.8818	1.94885	1.62109	2.88072	1.65776	1.20043	1.22642	1.23921	1.10034	1.19222	0.990997	1.02019	2.28281	1.33163	1.10635	1.0883	1.04192	1.51209		532.233	1.46331	3.50776	1.90781	2.22625	1.35561	1.29852	2.15039	1.18235	2.01708	1.62291	1.26827	1.57433	1.51087	1.35552	1.75639
591.25	1.38229	2.47877	2.01201	2.09751	1.87493	2.09158	1.52574	2.78089	1.67514	1.19712	1.23543	1.22678	1.13023	1.21068	0.984231	0.998896	2.25229	1.31792	1.085	1.06759	1.04896	1.53874		532.797	1.48647	3.17245	1.78068	2.17578	1.33738	1.27363	2.25872	1.1741	1.97989	1.63064	1.26812	1.56778	1.51511	1.3565	1.81026
591.875	1.41476	2.06063	2.22655	2.14637	1.8885	2.2273	1.4857	2.69469	1.70067	1.20222	1.24505	1.25115	1.16942	1.20305	0.976273	0.98468	2.19616	1.29582	1.06642	1.06193	1.04699	1.51317		533.36	1.54205	3.16879	1.70864	2.11275	1.36106	1.2565	2.28418	1.16886	1.99524	1.62495	1.25037	1.59876	1.52244	1.36883	1.80717
592.5	1.43887	1.81622	2.5203	2.16549	1.94082	2.3121	1.4831	2.5565	1.71974	1.20588	1.25307	1.32793	1.18558	1.18875	0.971686	0.986201	2.00949	1.30014	1.06556	1.07763	1.04359	1.54416		533.923	1.67799	3.23123	1.68105	2.10956	1.32351	1.25684	2.26376	1.14451	2.0991	1.65904	1.23542	1.62258	1.53961	1.33392	1.79665
593.125	1.44247	1.69688	2.77044	2.15312	2.02235	2.29304	1.5001	2.48532	1.75655	1.18169	1.22964	1.43403	1.14383	1.1988	0.969361	1.00537	1.96814	1.30352	1.06814	1.06241	1.02531	1.54984		534.486	1.76892	3.06977	1.7009	2.12984	1.32282	1.27318	2.25836	1.14133	2.19763	1.61785	1.21417	1.64282	1.54545	1.34339	1.7579
593.75	1.40824	1.61386	2.84395	2.1917	2.1878	2.17774	1.56863	2.48659	1.80141	1.17012	1.20533	1.5632	1.10056	1.19895	0.958401	1.011	1.95057	1.33372	1.0756	1.10908	1.01621	1.52063		535.049	1.89025	2.93665	1.6919	2.19756	1.29633	1.2556	2.35081	1.14426	2.17999	1.6596	1.21771	1.60988	1.55357	1.33355	1.73166
594.375	1.33161	1.56722	2.88638	2.27166	2.32558	1.95177	1.66719	2.47494	1.84849	1.17619	1.19883	1.58855	1.08429	1.18255	0.95547	0.995086	1.9818	1.36109	1.08975	1.10654	1.00642	1.44146		535.613	1.86382	2.99116	1.64847	2.28791	1.27942	1.24273	2.47684	1.13416	2.06812	1.6575	1.20708	1.5818	1.55532	1.34502	1.71235
595	1.30699	1.50151	2.88137	2.38961	2.32274	1.81844	1.74266	2.47438	1.81816	1.17331	1.19538	1.56242	1.08913	1.13436	0.958522	0.983602	2.05534	1.31171	1.10167	1.12766	1.02593	1.47506		536.176	1.84107	3.06886	1.54666	2.39666	1.2599	1.2404	2.6477	1.13336	1.95877	1.65543	1.19171	1.58306	1.54745	1.34004	1.63447
595.625	1.39574	1.45246	2.92003	2.643	2.1253	1.86575	1.74392	2.50667	1.72135	1.15769	1.21643	1.5447	1.09045	1.11161	0.976758	0.985378	2.14052	1.25804	1.09368	1.11248	1.03456	1.4849		536.739	1.86886	2.99024	1.49718	2.52335	1.25005	1.22406	2.75927	1.1332	1.98797	1.67811	1.20589	1.58042	1.51778	1.33383	1.58101
596.25	1.49778	1.50266	2.92876	2.84501	2.02243	2.01279	1.69079	2.54291	1.66294	1.14794	1.28479	1.46845	1.09548	1.11237	0.989835	0.998494	2.14368	1.25955	1.08455	1.1075	1.02733	1.47273		537.302	1.87656	2.97734	1.48006	2.48823	1.29036	1.22643	2.6788	1.14451	2.11364	1.64313	1.22197	1.61178	1.51964	1.33284	1.55308
596.875	1.56308	1.60271	3.11022	3.13617	2.08373	2.22755	1.60487	2.61155	1.68423	1.14347	1.32743	1.30753	1.10123	1.08552	0.981977	1.00453	2.15375	1.27492	1.08167	1.10909	1.02933	1.48565		537.866	1.81628	3.08114	1.47946	2.40491	1.28266	1.22245	2.45685	1.15775	2.30858	1.60196	1.23466	1.66787	1.51346	1.33515	1.53863
597.5	1.53086	1.61904	3.35195	3.37166	2.17276	2.61919	1.57631	2.75379	1.70029	1.13882	1.29795	1.22792	1.09542	1.10095	0.968698	1.02798	2.03321	1.2726	1.08577	1.10824	1.01842	1.48099		538.429	1.87823	3.37929	1.50181	2.32103	1.26434	1.24361	2.34613	1.16634	2.37664	1.57984	1.21135	1.69343	1.52277	1.2882	1.57893
598.125	1.37723	1.61247	3.46643	3.55919	2.0653	2.70519	1.53684	2.9119	1.6762	1.14053	1.33806	1.24399	1.09281	1.10208	0.971142	1.05502	1.87841	1.29725	1.08155	1.10275	1.0288	1.48637		538.992	1.95573	3.70174	1.48301	2.25791	1.30194	1.24311	2.37171	1.17463	2.49925	1.59207	1.18058	1.70415	1.55951	1.28474	1.56855
598.75	1.23871	1.56186	3.41761	3.49257	1.94363	2.78544	1.49096	2.87611	1.66221	1.13971	1.33733	1.22998	1.10568	1.10039	0.969861	1.03548	1.8461	1.28995	1.08931	1.13213	1.04775	1.50682		539.555	2.0217	3.79536	1.45265	2.28459	1.29096	1.24014	2.50353	1.1712	2.57872	1.6148	1.17557	1.74735	1.58377	1.30875	1.56738
599.375	1.18583	1.44949	3.20607	2.96665	1.94634	3.06584	1.47454	2.7918	1.64002	1.14079	1.31701	1.24681	1.11357	1.0969	0.959981	1.007	1.83286	1.24599	1.1038	1.13416	1.05497	1.54336		540.118	2.00808	3.65562	1.46347	2.27963	1.27184	1.25086	2.58384	1.19391	2.45418	1.60245	1.16316	1.76691	1.57243	1.29347	1.54548
600	1.215	1.38415	2.89329	2.75731	2.08055	2.80333	1.49583	2.68287	1.58158	1.15463	1.27846	1.2552	1.10635	1.11056	0.958408	0.999228	1.87352	1.19905	1.10296	1.15935	1.06513	1.51584		540.682	1.83717	3.28163	1.53922	2.14472	1.2558	1.24213	2.59963	1.2059	2.19776	1.62849	1.14682	1.7865	1.54699	1.29639	1.57362
600.625	1.26338	1.34944	2.61914	2.67012	2.22638	2.50756	1.52807	2.57903	1.55976	1.16946	1.25698	1.20989	1.10652	1.12188	0.96528	0.993601	1.89726	1.18918	1.10701	1.15176	1.07119	1.53124		541.245	1.66416	3.12035	1.63985	1.99758	1.25321	1.23474	2.69335	1.21548	1.86931	1.62286	1.15616	1.81589	1.544	1.27845	1.56251
601.25	1.33727	1.36247	2.37869	2.65672	2.39139	2.29372	1.54971	2.45354	1.58253	1.17724	1.24926	1.18186	1.12117	1.13987	0.981287	1.00867	1.98277	1.19546	1.12218	1.15808	1.08692	1.51469		541.808	1.59982	3.158	1.64339	1.93467	1.27401	1.22712	3.03069	1.23524	1.68781	1.61283	1.15093	1.83227	1.54711	1.29545	1.54615
601.875	1.35935	1.42377	2.27498	2.68311	2.67667	2.19802	1.59289	2.33954	1.62467	1.18466	1.23925	1.16766	1.13912	1.14769	0.967467	1.02079	2.05579	1.19423	1.11614	1.18546	1.0935	1.49434		542.371	1.56982	3.04754	1.54535	1.97696	1.27336	1.20547	3.39465	1.2626	1.5848	1.60336	1.17948	1.78745	1.54153	1.32615	1.48437
602.5	1.31271	1.56829	2.2925	2.69317	2.69572	2.17442	1.70208	2.27673	1.67251	1.18357	1.2256	1.17084	1.16528	1.12542	0.96158	1.01778	1.92736	1.21004	1.09646	1.22219	1.08949	1.50685		542.934	1.55131	2.78095	1.41606	2.12555	1.29114	1.20692	3.75594	1.28019	1.53594	1.57599	1.19612	1.78411	1.52537	1.34055	1.4371
603.125	1.32065	1.71073	2.31125	2.55832	2.56818	2.19279	1.82193	2.38038	1.75607	1.18362	1.22494	1.1735	1.16651	1.10818	0.960847	1.0192	1.80991	1.28305	1.0867	1.19749	1.11734	1.55716		543.498	1.53997	2.67008	1.34956	2.43074	1.28341	1.20613	4.10903	1.27505	1.53105	1.57757	1.21189	1.78765	1.52561	1.32009	1.43664
603.75	1.34029	1.74137	2.41711	2.48762	2.45721	2.11005	1.82879	2.58524	1.8975	1.20074	1.21233	1.17397	1.13068	1.12423	0.966013	1.02267	1.77089	1.38923	1.08408	1.15103	1.11836	1.54965		544.061	1.5033	2.4405	1.33006	2.74292	1.2571	1.23072	4.35405	1.25286	1.5884	1.59313	1.2369	1.80989	1.54037	1.30781	1.4256
604.375	1.25658	1.65955	2.59381	2.47124	2.35839	1.92018	1.75659	2.60714	2.00901	1.21876	1.19507	1.15894	1.0893	1.13697	0.971553	1.0322	1.78131	1.41906	1.08146	1.13209	1.13239	1.48518		544.624	1.49722	2.31788	1.34493	2.43745	1.29579	1.26406	4.18716	1.23276	1.66525	1.61394	1.21324	1.78578	1.54431	1.33959	1.41495
605	1.18956	1.55814	2.45878	2.44777	2.24028	1.80164	1.70543	2.45269	1.92605	1.23867	1.18743	1.13514	1.07964	1.17776	0.973336	1.03359	1.83274	1.41603	1.08674	1.12209	1.1435	1.46328		545.187	1.59839	2.32276	1.34597	2.12921	1.2871	1.28635	3.63836	1.22356	1.71212	1.5965	1.20746	1.74884	1.5433	1.33512	1.40176
605.625	1.16745	1.50178	2.30124	2.55101	2.42558	1.84572	1.65106	2.42122	1.78832	1.24307	1.19327	1.11368	1.08966	1.16941	0.978179	1.02614	1.83301	1.39582	1.103	1.11003	1.13176	1.49266		545.75	1.69068	2.38025	1.36997	2.02305	1.28645	1.29498	2.97344	1.21492	1.75628	1.5757	1.23613	1.78653	1.53432	1.33928	1.40833
606.25	1.16387	1.45671	2.45532	2.58592	2.46187	1.81068	1.5412	2.45965	1.77145	1.21773	1.18406	1.10929	1.08709	1.20906	0.98497	1.0031	1.76776	1.37191	1.11212	1.10596	1.13867	1.49456		546.314	1.69279	2.52361	1.34987	1.99355	1.28072	1.29119	2.63712	1.21299	1.9043	1.57893	1.22119	1.83397	1.54256	1.34158	1.4111
606.875	1.1775	1.40118	2.91	2.73136	2.39715	1.78446	1.48858	2.37816	1.87341	1.17967	1.1724	1.09828	1.06087	1.20024	0.985116	0.999242	1.76029	1.35092	1.10247	1.11993	1.13862	1.52902		546.877	1.63063	2.62926	1.32826	1.95066	1.27414	1.29581	2.44997	1.21194	2.0169	1.60643	1.20868	1.83949	1.5716	1.32418	1.35392
607.5	1.22096	1.35739	3.48714	2.58372	2.35507	1.7919	1.49427	2.34732	1.91947	1.16245	1.19129	1.08456	1.04052	1.19028	0.983991	1.01198	1.85698	1.30851	1.0977	1.1346	1.11057	1.52866		547.44	1.57984	2.5344	1.31649	1.96889	1.27985	1.29361	2.51174	1.23204	2.13068	1.55855	1.23077	1.80875	1.57454	1.32618	1.38624
608.125	1.23367	1.37089	3.52809	2.51419	2.39821	1.86771	1.55964	2.44921	1.9182	1.16999	1.19624	1.08912	1.03513	1.16269	0.987251	1.00848	1.71174	1.27426	1.09702	1.10165	1.11422	1.54978		548.003	1.56206	2.53329	1.2987	1.96489	1.27819	1.30899	2.60352	1.23953	2.24554	1.54183	1.22322	1.77	1.54134	1.34504	1.36115
608.75	1.23107	1.35674	2.9611	2.69407	2.88226	1.97583	1.61406	2.56382	2.03805	1.18496	1.16672	1.11045	1.02756	1.12499	0.988881	0.988179	1.61127	1.27153	1.10053	1.07016	1.10118	1.49906		548.567	1.53953	2.57684	1.2802	1.98236	1.27844	1.30546	2.71562	1.25738	2.17502	1.53917	1.21025	1.75156	1.51278	1.33204	1.33887
609.375	1.22448	1.37322	2.66095	2.84799	3.18997	1.98824	1.64666	2.58313	2.20205	1.18729	1.16448	1.11254	1.02929	1.15062	0.997844	0.988158	1.69587	1.28379	1.1002	1.05421	1.10745	1.49551		549.13	1.52795	2.59174	1.31235	2.0829	1.29378	1.31574	2.8596	1.25159	2.00176	1.53547	1.21151	1.72559	1.50855	1.32695	1.33997
610	1.24447	1.40051	2.72553	2.69897	2.81127	1.91491	1.61953	2.49592	2.33711	1.17673	1.15851	1.10822	1.04659	1.1458	0.996549	0.992632	1.78573	1.28555	1.10845	1.04966	1.15814	1.50084		549.693	1.55137	2.54737	1.31302	2.12684	1.29092	1.34475	2.90775	1.23331	1.92524	1.59181	1.20105	1.72443	1.50435	1.3011	1.35073
610.625	1.27413	1.43614	2.8875	2.59241	2.52464	1.85608	1.62569	2.33951	2.42964	1.1643	1.16629	1.11712	1.06453	1.15295	0.992184	0.994686	1.68941	1.26809	1.10677	1.05903	1.18845	1.48268		550.256	1.57856	2.44836	1.3311	2.20378	1.30768	1.36979	2.97747	1.23908	1.8919	1.57447	1.18027	1.75844	1.49174	1.28509	1.37863
611.25	1.32107	1.46624	2.75354	2.48303	2.44013	1.83971	1.63434	2.19618	2.39976	1.15224	1.21166	1.12294	1.09209	1.18257	0.991382	1.00149	1.64407	1.25163	1.10546	1.08602	1.17291	1.45666		550.819	1.64333	2.4025	1.34556	2.29157	1.33015	1.39363	2.89782	1.24237	1.89442	1.54288	1.17226	1.76338	1.4948	1.29478	1.42116
611.875	1.32426	1.47037	2.61709	2.46745	2.30808	1.91378	1.66114	2.09304	2.2978	1.15229	1.24056	1.12901	1.1431	1.19436	0.982198	1.02124	1.64294	1.25776	1.1067	1.06661	1.13863	1.46274		551.383	1.71545	2.34447	1.32744	2.35151	1.30336	1.4353	2.76183	1.24723	1.98797	1.57638	1.19484	1.75936	1.49815	1.32784	1.43768
612.5	1.26038	1.45673	2.49111	2.49598	2.34195	2.08346	1.71403	2.04875	2.21956	1.16351	1.24103	1.13835	1.20156	1.16439	0.995803	1.00834	1.69596	1.26622	1.10883	1.05047	1.1371	1.49324		551.946	1.66831	2.44713	1.33239	2.41252	1.34073	1.48839	2.72831	1.25759	2.07207	1.59408	1.20996	1.77754	1.51177	1.32214	1.4678
613.125	1.23398	1.51664	2.26435	2.56276	2.32186	2.14231	1.73894	2.0664	2.16456	1.18806	1.23411	1.12155	1.24436	1.1604	1.0196	0.994422	1.69521	1.27931	1.11157	1.03633	1.15066	1.50917		552.509	1.64837	2.6382	1.32393	2.47191	1.3552	1.53927	2.78634	1.25756	2.07753	1.553	1.22242	1.75276	1.52667	1.33615	1.40877
613.75	1.28147	1.54509	2.20183	2.72313	2.23798	2.08158	1.65974	2.09134	2.10261	1.20531	1.22149	1.13442	1.25124	1.15151	1.01429	0.994492	1.65836	1.30039	1.11739	1.01263	1.1175	1.46504		553.072	1.67068	2.8298	1.29457	2.49019	1.33485	1.5673	2.57632	1.26179	2.04612	1.57914	1.23933	1.75622	1.54004	1.30324	1.40145
614.375	1.33907	1.56684	2.27813	2.97274	2.13498	2.04517	1.58235	2.14331	2.08167	1.19374	1.19834	1.16891	1.1911	1.16857	1.0057	1.00418	1.6159	1.30731	1.1147	1.00006	1.13438	1.4873		553.635	1.66095	2.70745	1.29023	2.46272	1.26271	1.54561	2.35054	1.2689	2.0134	1.59284	1.27403	1.7616	1.54682	1.34728	1.39069
615	1.34722	1.4962	2.52419	3.16341	2.09231	2.11344	1.58539	2.2494	2.10782	1.18034	1.22263	1.14329	1.11836	1.19252	0.98921	1.001	1.60784	1.30425	1.10892	1.00311	1.10829	1.45381		554.199	1.62266	2.41456	1.24007	2.34594	1.25446	1.51186	2.36755	1.29349	2.04706	1.60396	1.23054	1.76832	1.56683	1.34441	1.41204
615.625	1.31944	1.40098	2.7695	3.31842	2.13588	2.24484	1.65007	2.44789	2.14397	1.18484	1.24493	1.10813	1.07445	1.16424	0.996359	1.00201	1.63156	1.30353	1.11957	1.00704	1.09516	1.4184		554.762	1.57601	2.20094	1.23158	2.23921	1.24732	1.48034	2.45887	1.30374	2.01869	1.63175	1.23118	1.75528	1.58063	1.35051	1.4223
616.25	1.26758	1.35934	2.66215	3.27237	2.1754	2.45433	1.70606	2.51785	2.12662	1.19613	1.27015	1.09858	1.04493	1.17108	1.02461	0.988331	1.60172	1.31553	1.12136	1.0126	1.08785	1.41864		555.325	1.51277	2.148	1.23604	2.149	1.25343	1.46213	2.54005	1.29506	1.93798	1.69301	1.22729	1.74308	1.57526	1.34645	1.4226
616.875	1.23566	1.31763	2.46213	3.11808	2.2707	2.6903	1.76177	2.31172	2.14647	1.19477	1.26064	1.09896	1.02643	1.16588	1.0186	0.994458	1.53825	1.35142	1.10945	1.00937	1.09039	1.46296		555.888	1.41139	2.11679	1.24433	2.03941	1.2656	1.43468	2.59945	1.31137	1.87603	1.7059	1.24726	1.73689	1.55319	1.39595	1.3666
617.5	1.22783	1.29856	2.33388	3.16925	2.30624	2.57788	1.82205	2.24945	2.28829	1.19659	1.24589	1.10847	1.01898	1.15715	1.0057	0.993088	1.49306	1.3597	1.10964	1.01641	1.10418	1.47929		556.451	1.37417	2.05143	1.26092	2.00527	1.27978	1.39994	2.67716	1.34068	1.82138	1.65546	1.22578	1.74161	1.5437	1.39511	1.40427
618.125	1.22981	1.30556	2.31582	3.47234	2.30406	2.35712	1.87677	2.30668	2.43156	1.19425	1.23278	1.08057	1.03469	1.17061	0.994855	1.00333	1.56292	1.42185	1.10579	1.01245	1.09634	1.47263		557.015	1.36165	2.02965	1.26109	1.92652	1.29217	1.39097	2.66843	1.34286	1.81416	1.63058	1.22205	1.74855	1.53454	1.37558	1.37817
618.75	1.25287	1.31316	2.25288	4.02572	2.3144	2.26924	1.92255	2.34386	2.4907	1.19915	1.20574	1.08034	1.04225	1.18434	0.997882	1.01113	1.67117	1.44776	1.09694	1.02341	1.08634	1.52355		557.578	1.37699	2.03982	1.26329	1.95745	1.26627	1.38416	2.57577	1.3403	1.76408	1.63145	1.2285	1.74543	1.53314	1.36042	1.36975
619.375	1.26053	1.32841	2.16697	4.18409	2.15198	2.1969	1.99978	2.40063	2.54834	1.22339	1.18003	1.09118	1.03783	1.16274	1.01715	1.00136	1.62438	1.42027	1.10233	1.03447	1.08219	1.52136		558.141	1.41307	2.02141	1.2305	2.02171	1.27095	1.36019	2.52787	1.36239	1.78118	1.64301	1.23591	1.71295	1.54661	1.36209	1.35025
620	1.29715	1.34572	2.1228	4.17392	2.31656	2.31518	1.98838	2.5347	2.50281	1.23922	1.18888	1.10016	1.03185	1.1255	1.02726	1.00076	1.47116	1.3703	1.11397	1.02091	1.11031	1.49323		558.704	1.32831	2.11418	1.24911	1.99947	1.28924	1.3247	2.51949	1.40307	1.74444	1.61176	1.21534	1.73234	1.54042	1.36713	1.38489
620.625	1.31189	1.39118	2.06584	3.92486	2.55616	2.36141	1.9093	2.64518	2.51317	1.24066	1.23234	1.10011	1.02349	1.09285	1.01574	0.998198	1.43328	1.34733	1.10985	1.04295	1.13933	1.46757		559.268	1.24069	2.24555	1.22997	1.98978	1.31732	1.30811	2.65844	1.46923	1.70796	1.58863	1.21501	1.8	1.53904	1.36813	1.38546
621.25	1.32085	1.42564	2.0448	3.8959	2.52804	2.27066	1.82007	2.75536	2.62925	1.24092	1.24227	1.09949	1.01299	1.0887	1.00709	0.990577	1.41768	1.34111	1.12142	1.06651	1.13127	1.48139		559.831	1.14475	2.32084	1.2758	1.9414	1.29886	1.31704	2.72585	1.51269	1.61229	1.62424	1.19895	1.8617	1.53812	1.37276	1.41007
621.875	1.3267	1.4137	2.00268	3.8225	2.41117	2.34798	1.73214	2.83256	2.70399	1.22781	1.22086	1.08583	1.01271	1.10607	1.01138	0.995674	1.38196	1.33082	1.1225	1.08443	1.14479	1.47241		560.394	1.09231	2.29993	1.28461	1.91017	1.31604	1.36267	2.73496	1.48671	1.58511	1.58666	1.21586	1.92045	1.52946	1.3784	1.43116
622.5	1.32452	1.43421	2.03563	3.80469	2.33607	2.48675	1.70858	2.83735	2.69728	1.20275	1.2379	1.08182	1.01805	1.10415	0.998419	0.989977	1.41559	1.31188	1.12106	1.06383	1.12667	1.47389		560.957	1.07057	2.32016	1.30568	1.94661	1.34574	1.40575	2.65249	1.40832	1.58159	1.5681	1.24024	1.96155	1.51923	1.36205	1.40689
623.125	1.32388	1.44702	2.00925	3.77535	2.43022	2.5144	1.70798	2.8217	2.59911	1.18481	1.25471	1.09835	1.01249	1.11949	0.995653	0.985718	1.42557	1.33655	1.11706	1.05378	1.1502	1.4623		561.52	1.04141	2.37683	1.30169	1.96189	1.33827	1.46402	2.72297	1.34936	1.59825	1.57822	1.23	2.00094	1.52173	1.37261	1.39023
623.75	1.33829	1.41328	1.95871	3.70785	2.50781	2.61427	1.69898	2.96765	2.47812	1.18327	1.26522	1.1052	1.00714	1.12653	1.01067	1.01821	1.43856	1.367	1.12489	1.05386	1.14239	1.46123		562.084	1.03918	2.36107	1.28461	1.94029	1.35869	1.56334	2.72465	1.30721	1.57491	1.61267	1.21076	2.01825	1.53513	1.3323	1.36749
624.375	1.38776	1.39768	1.98952	4.12975	2.60341	2.44227	1.72648	3.07486	2.4183	1.19467	1.26755	1.12008	1.01677	1.15497	1.01166	1.01904	1.49411	1.36763	1.12173	1.02797	1.15018	1.50984		562.647	1.01331	2.35955	1.29132	1.88165	1.32075	1.78591	2.58268	1.30017	1.5666	1.59708	1.18931	2.01715	1.54844	1.33752	1.35345
625	1.3336	1.38728	2.05879	4.92347	2.96112	2.30459	1.84176	3.01653	2.3586	1.18525	1.28189	1.14307	1.05431	1.16211	1.0093	1.0189	1.48275	1.3223	1.11281	1.0329	1.14132	1.50604		563.21	1.02473	2.35543	1.28489	1.88814	1.30315	2.19699	2.44362	1.3539	1.57559	1.59295	1.19106	1.99454	1.55091	1.33996	1.34255
625.625	1.28556	1.36936	2.16301	4.85093	3.22131	2.26857	2.00056	2.90301	2.29304	1.18036	1.28128	1.12141	1.12516	1.14727	1.0204	1.01455	1.43682	1.30391	1.10809	1.02784	1.13253	1.49208		563.773	1.05135	2.44595	1.31601	1.96518	1.28857	2.87805	2.40533	1.498	1.6186	1.59646	1.20688	1.9503	1.53983	1.363	1.34628
626.25	1.30911	1.35641	2.21348	4.49403	3.14852	2.27863	2.02661	2.78689	2.17433	1.21091	1.27001	1.11969	1.18507	1.12933	1.01919	1.01776	1.39371	1.30238	1.10523	1.05204	1.09214	1.50599		564.336	1.09224	2.66629	1.32579	1.99812	1.29282	3.68746	2.37075	1.66183	1.6462	1.58375	1.20609	1.91098	1.53411	1.36265	1.32135
626.875	1.28743	1.39957	2.25676	4.63658	2.9365	2.30285	1.92958	2.67348	2.05471	1.23597	1.24303	1.11889	1.23754	1.13354	0.993422	1.01062	1.42384	1.32735	1.11653	1.08357	1.09503	1.47582		564.9	1.13246	2.82112	1.31177	2.01502	1.32129	4.19916	2.45239	1.73857	1.70981	1.59613	1.20513	1.887	1.52579	1.37116	1.33429
627.5	1.29428	1.45323	2.19715	5.14075	2.86621	2.3502	1.83657	2.71561	2.01375	1.22946	1.22584	1.09634	1.22426	1.14664	0.982292	1.02146	1.4347	1.41833	1.1221	1.06128	1.09679	1.45079		565.463	1.14807	2.82841	1.27885	1.98897	1.32886	4.35457	2.57312	1.73982	1.75472	1.64268	1.19373	1.86216	1.52271	1.37714	1.33839
628.125	1.29549	1.52435	2.10248	5.58529	2.79544	2.30423	1.82993	2.77207	2.03243	1.22214	1.25753	1.10204	1.14432	1.12532	0.997155	1.03671	1.43531	1.50967	1.11573	1.06526	1.13922	1.44376		566.026	1.15856	2.74396	1.24704	2.01371	1.31975	4.21886	2.73288	1.78681	1.70473	1.63041	1.19816	1.8429	1.52706	1.352	1.35194
628.75	1.31471	1.61515	2.10899	6.04577	2.61699	2.25611	1.90773	3.09369	2.07158	1.21468	1.28792	1.10255	1.09419	1.14602	0.995601	1.03216	1.45618	1.51626	1.10516	1.05682	1.14798	1.49985		566.589	1.14659	2.7214	1.26106	2.00981	1.34424	3.9041	2.85546	1.88407	1.62664	1.61429	1.18716	1.8087	1.54705	1.354	1.35826
629.375	1.34184	1.67533	2.1513	6.22198	2.4904	2.30937	2.14637	3.09403	2.11206	1.21288	1.26845	1.11733	1.11644	1.14453	0.999878	1.02556	1.44716	1.45855	1.09704	1.04891	1.10775	1.48459		567.152	1.09823	2.54281	1.25092	2.01217	1.31789	3.42791	2.96442	1.90561	1.53479	1.61607	1.1916	1.78497	1.56183	1.39511	1.34794
630	1.40087	1.70509	2.30013	5.47395	2.36772	2.44246	2.54273	2.90352	2.19769	1.22487	1.2405	1.12426	1.14797	1.13812	1.01377	1.00938	1.43526	1.36931	1.09982	1.05577	1.09051	1.46044		567.716	1.09733	2.47555	1.27949	2.02501	1.32527	3.02322	3.04389	1.84192	1.48191	1.6197	1.19269	1.81797	1.5386	1.39112	1.37107
630.625	1.42881	1.68428	2.55044	4.43417	2.28233	2.35576	2.83419	2.81052	2.35067	1.23944	1.2313	1.12121	1.13592	1.13218	1.00882	0.999055	1.45786	1.29408	1.1066	1.03964	1.12128	1.46586		568.279	1.12624	2.55098	1.28355	2.08946	1.33816	2.91552	3.10104	1.75063	1.47476	1.60412	1.19772	1.84401	1.53099	1.38774	1.38796
631.25	1.46755	1.69721	2.63712	4.07229	2.34349	2.14197	2.79019	2.8243	2.40699	1.23916	1.2432	1.10256	1.13269	1.13566	1.0016	0.98876	1.45944	1.26379	1.11205	1.04808	1.10501	1.47938		568.842	1.13704	2.53003	1.26501	2.16878	1.35077	2.82494	3.06052	1.68545	1.51444	1.60911	1.22477	1.84042	1.54118	1.38833	1.37022
631.875	1.47125	1.73529	2.49403	4.07588	2.38952	2.20524	2.5398	2.88192	2.36998	1.23462	1.25464	1.09988	1.12536	1.12556	1.00751	0.990475	1.45863	1.28194	1.1088	1.04682	1.10013	1.46847		569.405	1.14212	2.34117	1.26214	2.30744	1.34129	2.80609	3.10297	1.68597	1.52305	1.61775	1.21508	1.81246	1.55787	1.39134	1.36641
632.5	1.40565	1.70956	2.39466	3.96998	2.43529	2.16932	2.2073	2.92459	2.31006	1.23651	1.29667	1.09111	1.09113	1.12044	1.01292	1.00287	1.45035	1.2972	1.11072	1.03658	1.09167	1.44418		569.969	1.13239	2.18928	1.24547	2.36428	1.31114	2.92924	3.22627	1.69769	1.54312	1.59196	1.20305	1.80081	1.57619	1.36748	1.36564
633.125	1.40022	1.62444	2.46653	3.91095	2.56377	2.22052	2.01101	2.93574	2.231	1.24533	1.33681	1.08805	1.07764	1.12336	1.019	1.02292	1.4212	1.27505	1.1196	1.04284	1.08938	1.46002		570.532	1.15523	2.08781	1.24058	2.06816	1.33056	3.24109	3.30661	1.71175	1.54723	1.57002	1.20897	1.80909	1.60625	1.34622	1.35134
633.75	1.47137	1.59999	2.44238	3.81027	2.43052	2.45974	1.97062	2.86168	2.18692	1.24717	1.37492	1.09405	1.07744	1.13524	1.02862	1.01884	1.42703	1.23662	1.1065	1.06107	1.09675	1.46867		571.095	1.16711	2.11397	1.22912	1.87651	1.32109	3.57217	3.21038	1.71833	1.55157	1.58489	1.21731	1.81881	1.61853	1.30929	1.34608
634.375	1.4304	1.67815	2.50107	3.74715	2.25335	2.67502	1.89366	2.66218	2.15489	1.23531	1.41554	1.08817	1.07535	1.14339	1.0131	1.00571	1.48669	1.2206	1.10714	1.06257	1.08401	1.46481		571.658	1.1724	2.1576	1.23934	1.80274	1.37545	3.8657	3.25098	1.72415	1.52052	1.58175	1.25213	1.8379	1.60441	1.32514	1.34719
635	1.37228	1.95422	2.56563	3.5772	2.22837	2.75038	1.80029	2.54942	2.16026	1.21261	1.39096	1.08032	1.07434	1.16087	1.00299	1.0054	1.5062	1.23637	1.10856	1.04153	1.07081	1.48244		572.221	1.18748	2.03627	1.25426	1.80957	1.38301	3.77269	3.31967	1.77191	1.47792	1.55911	1.24273	1.84789	1.58031	1.33369	1.3451
635.625	1.36041	2.13692	2.59187	3.42975	2.28777	2.72098	1.7751	2.4395	2.10682	1.20679	1.40048	1.0792	1.07269	1.1787	1.00545	1.01297	1.47865	1.25145	1.11126	1.0473	1.08469	1.45334		572.785	1.21927	1.84676	1.24794	1.86254	1.38083	3.67116	3.34417	1.76391	1.38517	1.58214	1.19057	1.84711	1.55134	1.33355	1.35317
636.25	1.33626	2.04821	2.57099	3.34947	2.34901	2.42693	1.78136	2.40892	2.01407	1.20474	1.40756	1.09749	1.0777	1.14453	0.997597	1.0337	1.4232	1.26612	1.10847	1.06773	1.09231	1.42783		573.348	1.27362	1.73634	1.23781	1.88017	1.38762	3.15953	3.41729	1.69478	1.36298	1.58544	1.19504	1.82788	1.51715	1.32296	1.33849
636.875	1.36499	1.94939	2.5027	3.26065	2.3243	2.23368	1.81162	2.56506	1.94589	1.18918	1.38259	1.10036	1.08421	1.14046	0.989595	1.03268	1.40591	1.27851	1.11718	1.08931	1.07806	1.4493		573.911	1.35827	1.71133	1.24079	1.85783	1.3839	2.35636	3.43836	1.62229	1.37958	1.58392	1.22917	1.77625	1.50876	1.32953	1.34592
637.5	1.39498	1.97903	2.31512	3.11936	2.33919	2.23431	1.82408	2.75758	1.93296	1.17981	1.34835	1.1055	1.08274	1.16186	0.980094	1.02711	1.40899	1.27804	1.11651	1.07043	1.0666	1.45145		574.474	1.40769	1.69656	1.19037	1.8787	1.34662	1.93538	3.42531	1.57558	1.35743	1.58019	1.20197	1.75175	1.51948	1.34621	1.35847
638.125	1.36958	1.99826	2.22822	3.09895	2.45396	2.34349	1.81458	2.81679	1.98698	1.18393	1.39776	1.10381	1.07693	1.16938	0.977131	1.00801	1.40186	1.27229	1.11642	1.0729	1.06289	1.47102		575.037	1.38369	1.69064	1.18517	1.88774	1.34688	1.72876	3.52124	1.55348	1.36327	1.59615	1.18863	1.76871	1.54513	1.3454	1.3353
638.75	1.30068	1.97032	2.23599	3.11683	2.86312	2.4228	1.84938	3.08098	2.09171	1.18578	1.43003	1.1218	1.09082	1.1755	0.968736	0.991145	1.40243	1.27801	1.1266	1.08691	1.08138	1.49269		575.601	1.27151	1.69095	1.18432	1.9034	1.31861	1.72488	3.58834	1.50313	1.38181	1.5924	1.22427	1.82171	1.55819	1.33768	1.32606
639.375	1.27479	1.94727	2.39204	3.0928	3.15146	2.49841	1.92136	3.57944	2.13506	1.18331	1.41487	1.12502	1.09872	1.15185	0.982108	0.984783	1.40515	1.28665	1.1244	1.11332	1.09295	1.50366		576.164	1.19728	1.63978	1.21438	1.92237	1.26388	1.9472	3.28895	1.44233	1.43476	1.60006	1.20072	1.86957	1.54102	1.34048	1.35332
640	1.30401	1.97402	2.66613	3.10339	3.12094	2.43794	2.06796	4.41491	2.18165	1.19194	1.38729	1.11989	1.09741	1.12467	0.994837	0.992639	1.40687	1.27946	1.13043	1.11423	1.1033	1.51404		576.727	1.16212	1.65436	1.26426	1.81326	1.26922	2.23457	2.88197	1.41081	1.50379	1.59271	1.20604	1.9073	1.51157	1.3396	1.37895
640.625	1.3717	2.03218	2.93951	3.01844	3.12689	2.35067	2.03895	4.32247	2.22807	1.19905	1.32235	1.1093	1.10682	1.11787	0.996372	1.01066	1.43619	1.24657	1.13538	1.10268	1.11145	1.4799		577.29	1.16286	1.67399	1.28229	1.76142	1.30335	2.14174	2.63996	1.3847	1.5204	1.59303	1.19753	1.92362	1.48439	1.3371	1.35556
641.25	1.36861	1.9922	3.18544	3.07057	3.69636	2.37038	1.94217	3.64198	2.16694	1.20589	1.29728	1.10549	1.11852	1.13705	1.0091	1.00099	1.44563	1.22715	1.12332	1.07593	1.12024	1.46945		577.853	1.15778	1.73059	1.29537	1.70366	1.28918	1.86123	2.57424	1.38426	1.5805	1.60904	1.20799	1.90863	1.48502	1.34717	1.34428
641.875	1.31065	1.98695	3.14616	3.18607	4.34326	2.23559	2.04471	3.18646	2.24488	1.22117	1.33129	1.08773	1.1183	1.16336	1.00055	1.00222	1.43961	1.2446	1.10874	1.08712	1.09277	1.47151		578.417	1.14917	1.77949	1.30822	1.71322	1.29409	1.76356	2.50611	1.40784	1.68911	1.63857	1.2394	1.90572	1.49243	1.34675	1.32767
642.5	1.28313	2.17675	2.98491	3.19187	5.07668	2.29865	2.40829	3.06701	2.20878	1.2502	1.33417	1.10738	1.10931	1.18057	0.983512	1.01093	1.43507	1.25707	1.09781	1.07725	1.0704	1.48713		578.98	1.17211	1.84647	1.31095	1.73939	1.33751	1.86704	2.57657	1.43184	1.80888	1.59601	1.25615	1.91439	1.48502	1.3262	1.33229
643.125	1.24867	2.49243	2.83538	3.17723	4.72217	2.43961	2.66298	3.17208	2.06258	1.25002	1.32586	1.11981	1.11743	1.15841	0.985147	1.03616	1.42715	1.27126	1.10265	1.04988	1.10227	1.47228		579.543	1.21555	2.01112	1.31039	1.79698	1.36321	1.91983	2.59572	1.46294	1.70472	1.57044	1.23381	1.91724	1.47918	1.33116	1.32463
643.75	1.26461	2.2627	2.92349	3.13897	4.05081	2.58158	2.6592	3.19579	1.93299	1.2364	1.29085	1.11543	1.14511	1.16124	0.98492	1.03937	1.41228	1.26008	1.11617	1.04557	1.1057	1.45816		580.106	1.27707	2.23322	1.35074	1.85483	1.37111	1.95775	2.5772	1.50527	1.70958	1.58095	1.2178	1.91663	1.48441	1.34649	1.31161
644.375	1.29107	2.03782	3.0559	3.03904	4.09132	2.57562	2.79341	3.03142	1.94432	1.22134	1.27048	1.11676	1.2054	1.15737	0.987833	1.04661	1.4014	1.29015	1.13063	1.07703	1.14074	1.4231		580.669	1.32415	2.31705	1.31799	1.94709	1.35852	2.06528	2.5621	1.59354	1.83456	1.57365	1.20721	1.91131	1.48315	1.33322	1.31748
645	1.31737	2.29058	2.97488	3.08808	4.22643	2.62943	2.93182	2.78595	1.94697	1.1937	1.25724	1.11498	1.23532	1.1596	0.990699	1.05256	1.40687	1.30325	1.12237	1.0656	1.13294	1.40789		581.233	1.34917	2.35741	1.27783	2.05258	1.32259	2.02138	2.66517	1.75497	2.07404	1.57804	1.22345	1.89089	1.48234	1.32843	1.34948
645.625	1.34777	2.659	2.61923	3.23351	4.16166	2.47628	2.94827	2.55775	1.88931	1.15613	1.23367	1.11134	1.21358	1.16141	0.99243	1.04044	1.4247	1.26651	1.13786	1.09375	1.12548	1.40324		581.796	1.33427	2.44332	1.2932	2.10997	1.34118	1.83798	2.77459	1.90016	2.2662	1.61235	1.21873	1.84465	1.48403	1.31263	1.35714
646.25	1.38975	2.56619	2.34724	3.27504	3.81419	2.35497	2.93753	2.51894	1.8812	1.14948	1.23938	1.11468	1.1822	1.1602	0.998576	1.0175	1.46345	1.24338	1.14387	1.11088	1.12201	1.43591		582.359	1.3684	2.56922	1.30406	2.13488	1.35831	1.6553	2.88525	2.00403	2.03012	1.57707	1.21324	1.80156	1.49681	1.32662	1.36653
646.875	1.40571	2.3639	2.36988	3.24477	3.63744	2.31142	2.99718	2.65541	1.95603	1.16775	1.26548	1.12041	1.14255	1.16056	0.988489	1.00679	1.45456	1.25465	1.12423	1.08996	1.11784	1.42211		582.922	1.55411	2.62206	1.283	2.07599	1.37587	1.52867	3.17449	1.89532	1.85165	1.57984	1.24599	1.76823	1.52584	1.35411	1.34821
647.5	1.42136	2.2947	2.54274	3.23716	3.77093	2.52623	3.04774	2.74799	2.05051	1.17781	1.28485	1.11449	1.13683	1.15875	0.980208	1.01942	1.46323	1.27763	1.11516	1.09344	1.11899	1.4392		583.486	1.63334	2.38849	1.25717	2.02889	1.36645	1.4902	3.21511	1.711	1.74806	1.57679	1.22247	1.75661	1.52574	1.33594	1.34573
648.125	1.40931	2.19231	2.62337	3.3592	3.69623	2.80525	2.93723	3.14857	2.09849	1.17467	1.31572	1.11613	1.14667	1.16075	0.982658	1.02287	1.47316	1.26838	1.12045	1.09511	1.12796	1.44627		584.049	1.4637	2.09246	1.27566	2.00156	1.37914	1.55943	3.05428	1.59511	1.76929	1.59865	1.19556	1.73082	1.51164	1.34949	1.33071
648.75	1.50701	1.85575	2.46143	3.58218	3.78634	2.89961	2.86007	3.75137	2.13365	1.14887	1.34977	1.1168	1.14257	1.15336	1.00329	1.01688	1.48073	1.25785	1.11557	1.07749	1.16044	1.42344		584.612	1.29361	2.06768	1.30951	2.04891	1.43707	1.64472	3.00142	1.57801	1.70671	1.59401	1.17459	1.71584	1.51768	1.336	1.31161
649.375	1.8353	1.58553	2.27754	3.84097	4.20129	2.93312	2.86709	4.35427	2.19441	1.13514	1.34589	1.1117	1.13825	1.13321	1.01809	1.01701	1.44471	1.2789	1.11563	1.08937	1.19265	1.43838		585.175	1.22121	2.03255	1.31069	2.15732	1.44845	1.62052	2.97156	1.61446	1.7109	1.58494	1.18017	1.71538	1.5207	1.34771	1.32141
650	2.04885	1.46143	2.25608	3.84617	4.62771	3.02415	2.95353	5.02043	2.24334	1.14275	1.29939	1.10218	1.13457	1.14158	1.03372	1.03212	1.4118	1.31385	1.11849	1.08289	1.19654	1.45419		585.738	1.21794	1.99074	1.29053	2.23798	1.44054	1.53546	3.0814	1.623	1.62399	1.58103	1.16452	1.73279	1.51991	1.3548	1.34417
650.625	1.9865	1.41682	2.33423	3.75288	4.69953	2.78951	3.00564	5.75862	2.19849	1.1556	1.26767	1.1361	1.1322	1.13744	1.01525	1.01765	1.43076	1.321	1.11301	1.08971	1.17824	1.43409		586.302	1.18917	2.04083	1.29014	2.31473	1.4578	1.45667	3.08685	1.63317	1.5131	1.57311	1.16808	1.71974	1.52078	1.37479	1.31606
651.25	1.77428	1.50044	2.36498	3.58635	4.20578	2.56	3.02122	6.11023	2.13323	1.16378	1.25983	1.19252	1.15004	1.15315	1.00491	1.01028	1.41928	1.28298	1.10854	1.09415	1.14618	1.40349		586.865	1.17014	2.23407	1.30085	2.31937	1.48639	1.40405	2.78807	1.62297	1.50901	1.58111	1.17159	1.68	1.52023	1.37262	1.34196
651.875	1.62929	1.69454	2.37762	3.484	3.98367	2.39548	3.02492	6.11266	2.18853	1.18907	1.26503	1.1466	1.18793	1.16353	1.01062	1.01692	1.42065	1.27247	1.11278	1.10678	1.15574	1.41316		587.428	1.17776	2.36354	1.30941	2.25201	1.56141	1.41954	2.60758	1.60499	1.51641	1.55481	1.16168	1.66196	1.52157	1.35948	1.33476
652.5	1.71097	1.82168	2.41593	3.50937	4.1068	2.37373	2.90452	5.8996	2.30196	1.19755	1.26783	1.11358	1.23011	1.15429	1.00441	1.01183	1.40632	1.30776	1.1167	1.09408	1.11511	1.43164		587.991	1.16913	2.39657	1.34603	2.15771	1.58246	1.45171	2.46944	1.63646	1.51187	1.56455	1.19316	1.65146	1.52635	1.3596	1.29783
653.125	1.81843	1.8281	2.50241	3.4764	4.24966	2.48334	2.78618	5.67464	2.29152	1.17596	1.26093	1.10033	1.26965	1.16875	1.01223	1.0054	1.3697	1.339	1.11675	1.07679	1.11855	1.47299		588.554	1.22714	2.2411	1.34304	2.11531	1.48404	1.45129	2.58908	1.71066	1.50473	1.56774	1.19833	1.65398	1.54416	1.32686	1.3019
653.75	1.81381	1.68627	2.40559	3.46969	3.72566	2.28072	2.61343	5.32774	2.18015	1.16768	1.22805	1.08236	1.26204	1.1603	1.00798	1.01076	1.36055	1.36095	1.10752	1.07701	1.10798	1.51639		589.118	1.25388	2.11915	1.35834	2.06966	1.44906	1.42267	2.6133	1.7496	1.49632	1.57054	1.18749	1.65624	1.56476	1.31435	1.30475
654.375	1.69289	1.56615	2.28519	3.49363	3.35388	2.15583	2.60928	5.23901	2.12624	1.16405	1.21025	1.07408	1.21334	1.16547	1.00721	1.01794	1.34386	1.35189	1.11437	1.07833	1.09516	1.42804		589.681	1.21308	1.91112	1.36931	2.00648	1.44318	1.37576	2.73733	1.73718	1.45664	1.54078	1.19147	1.68058	1.58295	1.35068	1.29801
655	1.63678	1.60861	2.16613	3.68341	3.32269	2.25765	2.64991	5.19539	2.18195	1.16191	1.21804	1.09868	1.18873	1.15626	1.00125	1.02189	1.31721	1.33163	1.12797	1.06923	1.08986	1.3975		590.244	1.22091	1.76506	1.37821	1.94044	1.46896	1.32698	2.95788	1.73741	1.44475	1.52086	1.18968	1.66601	1.60023	1.32734	1.33537
655.625	1.6278	1.64067	2.15553	3.86468	3.32794	2.31423	2.61616	5.43258	2.24893	1.17774	1.21912	1.12905	1.18954	1.17556	1.0007	1.0015	1.3062	1.32022	1.14257	1.05635	1.09392	1.39759		590.807	1.29248	1.68949	1.36873	1.85564	1.51086	1.31273	3.08761	1.75733	1.45432	1.55018	1.20367	1.66971	1.60697	1.35822	1.31656
656.25	1.55394	1.60298	2.20322	3.94407	3.03522	2.56954	2.44652	5.96888	2.35202	1.19015	1.23767	1.1406	1.20266	1.19341	0.995449	0.988664	1.31698	1.31538	1.14775	1.07668	1.09848	1.39598		591.37	1.39635	1.68327	1.38154	1.81593	1.56105	1.33019	2.97486	1.76409	1.46558	1.53932	1.20906	1.71464	1.59895	1.37142	1.33645
656.875	1.50562	1.6126	2.27746	3.83415	2.75594	3.09786	2.38996	6.54734	2.37822	1.19272	1.25642	1.11708	1.21391	1.15139	1.00357	1.00226	1.29081	1.33725	1.15812	1.07517	1.10407	1.38806		591.934	1.46356	1.7484	1.428	1.84284	1.56267	1.32445	2.77819	1.78358	1.44268	1.55252	1.20821	1.75552	1.57714	1.34678	1.30598
657.5	1.53272	1.70342	2.43435	3.59456	2.58671	3.53916	2.47821	6.70251	2.54953	1.19871	1.23252	1.10325	1.20406	1.13271	1.00095	1.03336	1.29367	1.39731	1.17196	1.08401	1.09895	1.40277		592.497	1.43333	1.90978	1.47551	1.82323	1.54775	1.34248	2.66954	1.80177	1.42894	1.55486	1.22055	1.76958	1.53359	1.35273	1.316
658.125	1.72983	1.72315	2.61597	3.49411	2.62387	3.51592	2.54175	6.25571	2.76536	1.21702	1.20794	1.09548	1.20087	1.17107	1.00007	1.05122	1.27367	1.41821	1.18007	1.09371	1.09923	1.41526		593.06	1.44708	2.15581	1.5333	1.78012	1.46288	1.41341	2.58494	1.88787	1.45316	1.55359	1.21002	1.79117	1.51299	1.37231	1.31477
658.75	1.96186	1.70084	2.7554	3.58827	2.64958	3.02998	2.52094	5.53501	2.75209	1.24437	1.1966	1.11244	1.2133	1.16802	1.01188	1.0347	1.27101	1.3763	1.18691	1.1131	1.09994	1.42429		593.623	1.4652	2.45685	1.52236	1.72988	1.41293	1.54675	2.49396	1.90815	1.53161	1.5189	1.2245	1.8373	1.51378	1.35153	1.32594
659.375	2.02429	1.65757	2.50282	3.72787	2.77547	2.70059	2.59522	5.10137	2.68063	1.2537	1.19154	1.09322	1.22464	1.15179	1.04151	1.02937	1.27966	1.31727	1.18897	1.09982	1.09401	1.44632		594.187	1.54162	2.68578	1.50765	1.69345	1.43078	1.77378	2.83834	1.83686	1.58081	1.51674	1.21976	1.86074	1.50355	1.34541	1.33467
660	2.00867	1.64039	2.25514	3.57351	2.78438	2.61404	2.70216	5.40802	2.70937	1.23851	1.17341	1.07478	1.23167	1.13602	1.04262	1.04533	1.28814	1.28745	1.17212	1.09679	1.08854	1.41199		594.75	1.59854	2.7605	1.49761	1.67347	1.45375	2.09147	3.60173	1.7713	1.54306	1.48273	1.20955	1.83607	1.52143	1.36376	1.33878
660.625	2.08163	1.60718	2.34861	3.56804	2.59992	2.5862	2.72958	5.93155	2.69007	1.22268	1.15789	1.0882	1.22622	1.1345	1.02076	1.04434	1.30036	1.30073	1.15108	1.10283	1.0853	1.40844		595.313	1.61504	2.99203	1.52817	1.67249	1.48668	2.49762	3.79236	1.77084	1.45322	1.49783	1.20302	1.76714	1.55952	1.36062	1.35486
661.25	1.88734	1.61222	2.62031	3.60187	2.61526	2.59706	2.69147	5.99679	2.54178	1.20977	1.15463	1.09177	1.22847	1.13376	0.995203	1.02388	1.31544	1.33477	1.13178	1.08965	1.0889	1.39831		595.876	1.56445	3.1364	1.54962	1.69451	1.52905	2.8612	3.58209	1.71697	1.42317	1.53378	1.19808	1.71061	1.56148	1.37018	1.34181
661.875	1.73253	1.82375	2.80541	3.71797	2.80187	2.67482	2.53164	5.85251	2.43175	1.20115	1.14772	1.099	1.23067	1.15544	1.00125	1.01267	1.34671	1.3769	1.13051	1.1018	1.09896	1.42494		596.439	1.55527	2.91277	1.58301	1.74302	1.55694	2.87901	3.16002	1.676	1.41243	1.54761	1.19765	1.68581	1.52503	1.37883	1.32637
662.5	1.76198	2.35563	2.57998	3.70383	2.79293	2.78068	2.3303	5.58632	2.32308	1.19824	1.14105	1.0998	1.24162	1.15806	0.995184	1.0179	1.38384	1.38664	1.13675	1.11813	1.14633	1.4161		597.003	1.6424	2.51	1.56707	1.79265	1.56615	2.48464	2.91101	1.68289	1.3866	1.59883	1.19474	1.67329	1.48681	1.38351	1.31115
663.125	1.75259	3.18853	2.24645	3.64647	3.07179	2.7031	2.27335	5.61934	2.29425	1.20626	1.14129	1.09234	1.22699	1.13318	0.996455	1.01767	1.3793	1.37727	1.1463	1.12356	1.15849	1.45291		597.566	1.71272	2.07115	1.66571	1.82108	1.5734	2.04164	2.74057	1.67696	1.42898	1.57647	1.22675	1.67016	1.48011	1.33439	1.3267
663.75	1.75332	3.5642	2.18146	3.7478	3.785	2.90396	2.24368	6.06425	2.30494	1.21302	1.14694	1.09942	1.20902	1.12398	1.01588	0.991298	1.36229	1.38041	1.15079	1.11948	1.11852	1.44688		598.129	1.59902	1.84229	1.72051	1.87388	1.54616	1.73991	2.57852	1.67516	1.4463	1.5826	1.21659	1.66273	1.49248	1.34378	1.34214
664.375	1.65408	3.33993	2.18298	3.65697	4.69986	3.51956	2.14112	6.34261	2.27088	1.22644	1.15571	1.13727	1.19147	1.13875	1.02339	0.997174	1.34052	1.39381	1.14559	1.10534	1.10987	1.41429		598.692	1.56651	1.77918	1.81947	1.91019	1.55463	1.61543	2.3308	1.74552	1.45493	1.56519	1.19782	1.69353	1.49397	1.3348	1.33962
665	1.5283	3.41268	2.12067	3.44573	4.87331	3.72664	2.055	5.98192	2.19478	1.24224	1.17261	1.13552	1.19781	1.13163	0.997244	1.00842	1.34791	1.39984	1.1465	1.08531	1.10174	1.41771		599.255	1.45692	1.74684	1.97227	1.92768	1.55551	1.57812	2.15996	1.85705	1.47329	1.58072	1.22218	1.68271	1.49587	1.31491	1.31523
665.625	1.46981	3.6709	1.97985	3.40047	3.8076	3.60406	1.95644	5.40922	2.11405	1.23547	1.17669	1.09509	1.22838	1.10769	0.984212	1.01695	1.38603	1.41572	1.14608	1.09457	1.08053	1.40797		599.819	1.43779	1.79885	2.11904	1.89815	1.52945	1.58675	2.10607	1.98906	1.48919	1.5714	1.23372	1.64749	1.50517	1.31868	1.34368
666.25	1.46397	3.35913	1.88236	3.39008	3.23886	3.04032	1.82028	4.70497	2.07562	1.22679	1.17663	1.08901	1.22628	1.10256	0.975469	1.03805	1.40266	1.46399	1.14639	1.10192	1.05805	1.45426		600.382	1.44458	1.78404	2.33538	1.87961	1.45196	1.63907	2.2562	2.00882	1.48072	1.54688	1.24421	1.64033	1.51343	1.32288	1.32856
666.875	1.51301	2.99436	1.82694	3.73069	3.02636	2.60143	1.74883	4.21887	2.13051	1.22081	1.18059	1.08552	1.18436	1.08911	0.979064	1.02471	1.39608	1.57286	1.12818	1.11485	1.0469	1.48952		600.945	1.4009	1.79112	2.61658	1.90688	1.40739	1.62481	2.47045	1.93599	1.48098	1.53741	1.23516	1.64626	1.51998	1.33634	1.32437
667.5	1.63231	2.65591	1.80997	3.81499	2.91602	2.47662	1.84667	4.04733	2.32188	1.20294	1.20836	1.09601	1.15121	1.09949	0.984281	0.989886	1.41179	1.65028	1.14588	1.09691	1.02553	1.48479		601.508	1.35909	1.81719	2.87165	1.84028	1.40164	1.51822	2.5973	1.93706	1.52678	1.53784	1.25392	1.62841	1.5231	1.33366	1.27836
668.125	1.60474	2.64968	1.85973	4.03566	2.58966	2.41906	2.05782	3.94503	2.56707	1.1952	1.22041	1.12373	1.13243	1.12952	0.987787	0.983381	1.35165	1.64128	1.14395	1.09095	1.01076	1.48261		602.071	1.35176	1.83868	2.98864	1.79609	1.32877	1.42736	2.70823	1.8963	1.62481	1.55435	1.28114	1.58138	1.53834	1.35169	1.27588
668.75	1.60574	2.79683	1.86683	3.7087	2.46061	2.46807	1.93568	3.95355	2.5849	1.20397	1.18985	1.13467	1.13595	1.14877	0.978154	1.00437	1.32351	1.5913	1.1594	1.09831	1.03119	1.47055		602.635	1.37789	1.80502	2.74292	1.70731	1.33527	1.35388	2.76906	1.90955	1.64023	1.55338	1.27001	1.54793	1.54562	1.39978	1.28304
669.375	1.58514	2.5835	1.96136	3.67438	2.46751	2.43145	1.78813	4.04022	2.50606	1.20575	1.20537	1.15058	1.1271	1.16701	0.971338	1.02407	1.34316	1.57983	1.16565	1.09143	1.05005	1.48199		603.198	1.35146	1.78588	2.24417	1.70945	1.34187	1.37514	2.86059	1.96858	1.58575	1.57566	1.23673	1.52685	1.56092	1.40951	1.26529
670	1.50367	2.32771	2.01408	3.68192	2.50479	2.29531	1.71089	4.14612	2.49508	1.19453	1.21829	1.14488	1.08889	1.16428	0.983006	1.03636	1.34841	1.58535	1.1523	1.10466	1.03463	1.49683		603.761	1.30346	1.78408	1.92137	1.66313	1.3386	1.38915	2.95726	1.99736	1.57982	1.58084	1.24132	1.50268	1.60079	1.38871	1.27577
670.625	1.47351	2.18265	2.01718	3.21771	2.5227	2.20652	1.66146	4.38515	2.48337	1.18396	1.16856	1.11376	1.0715	1.17077	1.00037	1.04528	1.32783	1.55022	1.14652	1.12001	1.0366	1.48032		604.324	1.31334	1.83036	1.74948	1.66701	1.3758	1.39823	2.88357	1.90908	1.57988	1.60138	1.24096	1.51406	1.61019	1.34809	1.29671
671.25	1.45736	2.18479	2.00831	3.16983	2.52154	2.13138	1.6787	4.51192	2.52236	1.18321	1.16006	1.08949	1.0713	1.17744	1.0069	1.01785	1.31286	1.50401	1.13923	1.09247	1.03629	1.48463		604.888	1.31825	1.88098	1.65397	1.72354	1.42512	1.37829	2.69303	1.8836	1.57818	1.60965	1.21301	1.52135	1.60848	1.31573	1.32017
671.875	1.43824	2.11595	2.03886	3.08468	2.46501	2.14324	1.70123	4.17207	2.56909	1.18672	1.17589	1.08087	1.08033	1.17549	1.00292	1.00069	1.30845	1.4833	1.14176	1.07578	1.03486	1.44091		605.451	1.32768	1.89287	1.59915	1.77157	1.41329	1.37144	2.54722	1.88978	1.55118	1.61687	1.22373	1.53351	1.58349	1.31734	1.32068
672.5	1.42807	1.92538	1.94273	3.0973	2.48518	2.34428	1.69217	3.94298	2.60446	1.18881	1.18164	1.06887	1.09563	1.144	1.02775	0.991172	1.31799	1.50787	1.13771	1.09461	1.05066	1.45378		606.014	1.29107	1.81355	1.58587	1.77968	1.39213	1.37743	2.57127	1.88453	1.56414	1.62218	1.20649	1.55101	1.53407	1.34413	1.29892
673.125	1.41014	1.87971	1.78246	2.99693	2.53645	2.61648	1.72842	3.7736	2.66628	1.21139	1.17357	1.06046	1.13177	1.11921	1.01563	1.00016	1.33514	1.49743	1.1372	1.10246	1.04962	1.42161		606.577	1.24805	1.84419	1.61603	1.8162	1.40206	1.42686	2.60312	1.83952	1.57493	1.58272	1.1966	1.53615	1.51356	1.36	1.27715
673.75	1.41485	1.93896	1.73316	2.88402	2.56179	2.83214	2.11058	3.66299	2.65941	1.23666	1.16041	1.06459	1.17461	1.11965	0.995955	1.01953	1.38027	1.44091	1.15053	1.11018	1.07047	1.40101		607.14	1.24126	1.93843	1.61233	1.85424	1.41247	1.53006	2.67457	1.83716	1.63781	1.568	1.19704	1.55019	1.49284	1.34404	1.30269
674.375	1.50163	1.94361	1.81182	2.78337	2.40554	3.02262	2.24904	3.83884	2.56415	1.22705	1.16132	1.07377	1.18665	1.11724	0.982583	1.02565	1.38514	1.39383	1.14886	1.10443	1.09045	1.40069		607.704	1.2224	2.12243	1.57633	1.85518	1.43497	1.58838	2.78456	1.80616	1.81749	1.56576	1.21023	1.56526	1.47546	1.29568	1.30803
675	1.61426	1.85317	1.9969	2.57494	2.23848	3.07893	2.26085	4.09379	2.43571	1.21801	1.19087	1.08105	1.18757	1.11751	0.959666	1.03062	1.35282	1.37091	1.13289	1.12591	1.08067	1.39004		608.267	1.19447	2.30364	1.48453	1.81537	1.48324	1.49652	2.76557	1.77232	1.97802	1.56998	1.2229	1.59099	1.47468	1.29676	1.31327
675.625	1.69455	1.75743	2.14449	2.66328	2.11874	2.9147	2.09396	3.98347	2.37424	1.21965	1.19776	1.08313	1.19559	1.11776	0.958055	1.05236	1.38455	1.41166	1.13354	1.10471	1.06253	1.40256		608.83	1.18712	2.37419	1.42328	1.77295	1.51486	1.41769	2.94528	1.7688	2.03719	1.56891	1.2271	1.6227	1.49118	1.30081	1.33812
676.25	1.76256	1.71363	2.28026	2.75874	2.08708	2.60802	1.8149	3.7641	2.45792	1.20287	1.24409	1.08667	1.19333	1.11725	0.959445	1.10079	1.45026	1.5266	1.14047	1.11175	1.05506	1.40622		609.393	1.23642	2.2467	1.41933	1.76624	1.57353	1.38913	3.15224	1.74756	2.07618	1.57289	1.22031	1.63121	1.50664	1.29014	1.33676
676.875	1.68593	1.73284	2.32963	2.94916	2.11063	2.48904	1.8542	3.77608	2.63524	1.17824	1.29517	1.09567	1.18924	1.09194	0.970619	1.18737	1.46958	1.68119	1.1432	1.09866	1.06704	1.41908		609.956	1.30694	2.13214	1.4781	1.78691	1.60899	1.31775	2.96921	1.69335	2.17715	1.59029	1.18579	1.61812	1.50703	1.32037	1.34349
677.5	1.61229	1.80611	2.22599	2.98559	2.03338	2.48004	1.94828	3.98906	2.73018	1.16786	1.26873	1.09755	1.18943	1.10198	0.988122	1.3165	1.48751	1.75585	1.14148	1.10033	1.10194	1.42086		610.52	1.26698	2.31739	1.49032	1.85258	1.52307	1.24093	2.75211	1.63138	2.28321	1.60623	1.17146	1.6063	1.50833	1.37345	1.31477
678.125	1.53954	1.82155	2.14493	2.83695	2.15803	2.66676	1.90326	4.09965	2.71735	1.16675	1.22087	1.10292	1.16588	1.10675	1.00052	1.3237	1.51087	1.68337	1.14196	1.11274	1.09458	1.45013		611.083	1.27384	2.33969	1.49818	1.87127	1.41962	1.19347	2.65737	1.58771	2.45998	1.61814	1.19604	1.5964	1.5001	1.33041	1.29668
678.75	1.52841	1.89083	2.14324	2.86222	2.32376	3.03067	1.7995	4.22017	2.6668	1.16784	1.20017	1.07426	1.15283	1.10373	1.03172	1.2269	1.42132	1.57088	1.15421	1.09744	1.05511	1.42972		611.646	1.29388	2.30341	1.45499	1.86517	1.41989	1.15722	2.66002	1.58939	2.77784	1.58575	1.20134	1.59375	1.50817	1.30798	1.29429
679.375	1.40689	1.90866	1.95159	2.58552	2.401	3.55869	1.76087	4.58439	2.63251	1.1623	1.20122	1.07605	1.14951	1.09999	1.03321	1.12319	1.36897	1.51526	1.16213	1.11508	1.04844	1.41245		612.209	1.38055	2.24558	1.42727	1.79955	1.42616	1.15873	2.84591	1.63076	3.5954	1.57939	1.22192	1.6021	1.52992	1.33732	1.31971
680	1.37084	1.86291	1.83201	2.46585	2.51683	3.63857	1.80721	4.62424	2.65842	1.15721	1.18258	1.07148	1.16876	1.09671	1.01498	1.05336	1.37035	1.4797	1.16044	1.08543	1.03523	1.38238		612.772	1.42567	1.99984	1.37705	1.76866	1.43346	1.17385	2.87693	1.64312	5.03233	1.606	1.20935	1.60704	1.53579	1.32565	1.327
680.625	1.39831	1.89836	1.75026	2.55137	2.46054	3.21983	1.69712	4.73809	2.70773	1.16705	1.18103	1.0756	1.22699	1.07215	0.984762	1.0152	1.36427	1.44072	1.17003	1.09394	1.03107	1.38962		613.336	1.5298	1.9309	1.31603	1.70647	1.47901	1.15824	2.72459	1.65852	6.22719	1.60611	1.19573	1.6296	1.51538	1.32672	1.31467
681.25	1.42337	1.91793	1.71678	2.71455	2.5303	2.86433	1.5905	4.95253	2.6545	1.17207	1.17921	1.07407	1.28369	1.05804	0.976796	1.01706	1.36684	1.38766	1.1614	1.09798	1.06622	1.40997		613.899	1.6942	1.92415	1.31627	1.65976	1.47089	1.15856	2.52036	1.7398	6.10218	1.57085	1.19032	1.65086	1.50258	1.32817	1.29867
681.875	1.4252	1.89618	1.73856	2.78021	2.67357	2.7557	1.60245	5.0887	2.55816	1.15588	1.19376	1.08507	1.26821	1.06357	0.981931	1.02934	1.39794	1.34945	1.15359	1.09494	1.09029	1.43483		614.462	1.83755	1.88739	1.34979	1.59833	1.4689	1.14092	2.40853	1.77341	4.97381	1.58726	1.20579	1.609	1.49845	1.33342	1.30796
682.5	1.37343	1.85088	1.7397	2.85455	2.78293	2.61581	1.76057	5.12697	2.5563	1.1461	1.18635	1.09997	1.24312	1.07629	0.997534	1.02516	1.48257	1.33494	1.15242	1.09568	1.08997	1.43736		615.025	1.71435	1.88204	1.36126	1.55199	1.49406	1.12295	2.44358	1.77164	4.32575	1.58014	1.20571	1.59834	1.48423	1.33798	1.30251
683.125	1.35405	1.88327	1.69884	2.78926	2.71378	2.54469	1.88981	5.12242	2.68253	1.13605	1.2027	1.13864	1.22788	1.10367	1.00819	1.01354	1.53191	1.34393	1.15517	1.10295	1.08067	1.45056		615.589	1.66475	1.92897	1.38705	1.51661	1.49596	1.12145	2.40838	1.75656	4.28582	1.608	1.18012	1.60865	1.46564	1.33603	1.30601
683.75	1.34519	1.84003	1.67987	2.7494	2.6536	2.57559	1.83881	5.07129	2.73539	1.12908	1.21332	1.12599	1.20624	1.09724	0.990428	1.02951	1.5176	1.35866	1.14956	1.08895	1.05895	1.45681		616.152	1.60703	1.95545	1.42263	1.48185	1.45543	1.13171	2.39116	1.77178	4.16963	1.57932	1.21083	1.57093	1.47611	1.32675	1.3166
684.375	1.32524	1.77093	1.64035	2.63683	2.63221	2.4383	1.78974	4.95683	2.67256	1.12465	1.21066	1.12896	1.18604	1.07173	0.995822	1.02007	1.50859	1.38835	1.15824	1.07965	1.06903	1.43853		616.715	1.53697	1.92	1.36317	1.47962	1.47512	1.15122	2.53054	1.80384	4.50258	1.56966	1.22266	1.55092	1.48829	1.34035	1.32385
685	1.33599	1.72504	1.63959	2.47413	2.69298	2.37886	1.80467	4.85196	2.56946	1.12641	1.2149	1.11376	1.17818	1.09405	1.00249	1.012	1.39935	1.41541	1.16458	1.07256	1.07833	1.43346		617.278	1.46513	1.90802	1.3209	1.51661	1.4489	1.17313	2.71696	1.78022	4.62638	1.57595	1.22309	1.53724	1.49182	1.36381	1.26923
685.625	1.33653	1.67718	1.64913	2.48135	2.9863	2.2709	1.80815	4.87533	2.54485	1.12967	1.22041	1.08525	1.16898	1.11407	0.986031	1.01145	1.37501	1.42367	1.17009	1.126	1.08912	1.42797		617.841	1.45753	1.93286	1.27287	1.57334	1.45112	1.22784	2.62461	1.76408	4.01424	1.57673	1.25058	1.52784	1.4843	1.35351	1.309
686.25	1.3399	1.66166	1.6749	2.56489	3.62608	2.30195	1.76714	4.94395	2.59611	1.13806	1.22302	1.07174	1.17345	1.12271	0.974017	1.02466	1.38826	1.39654	1.17292	1.11835	1.0849	1.43844		618.405	1.42031	1.91365	1.28127	1.61559	1.43644	1.27522	2.83643	1.70902	3.18771	1.59712	1.25269	1.51688	1.48705	1.35495	1.29948
686.875	1.37174	1.63395	1.70957	2.48456	3.5796	2.3683	1.74805	4.88545	2.68886	1.15311	1.23566	1.08616	1.18657	1.11991	0.968995	1.0305	1.3781	1.36226	1.17187	1.08175	1.05063	1.4305		618.968	1.27919	1.92632	1.26053	1.65252	1.51574	1.29991	2.87911	1.66049	2.47394	1.60129	1.24659	1.49775	1.48973	1.35917	1.31243
687.5	1.39149	1.61419	1.70642	2.43427	3.10376	2.35934	1.55832	4.75506	2.77355	1.17809	1.24569	1.09586	1.17915	1.08365	0.970751	1.02188	1.34037	1.34395	1.15875	1.0611	1.03589	1.42993		619.531	1.18671	1.88432	1.27212	1.68675	1.59733	1.29911	2.81662	1.62359	2.1584	1.59631	1.22384	1.49939	1.48277	1.34081	1.31865
688.125	1.40952	1.64855	1.68773	2.41163	2.80422	2.40945	1.45556	4.84807	2.73756	1.18685	1.21261	1.08994	1.16999	1.07996	0.973525	1.00137	1.34337	1.3483	1.14793	1.05355	1.03567	1.41731		620.094	1.17491	1.76232	1.28722	1.65573	1.64238	1.24138	2.64543	1.60908	2.00917	1.60012	1.23732	1.50675	1.46622	1.31481	1.33407
688.75	1.42449	1.67644	1.67853	2.37633	2.64819	2.63782	1.41423	4.96027	2.56596	1.17509	1.20405	1.07556	1.16771	1.07829	0.988995	0.9884	1.33822	1.36573	1.14464	1.06577	1.04253	1.4396		620.657	1.17029	1.71614	1.28916	1.62647	1.64912	1.20934	2.32399	1.60438	1.98089	1.61697	1.21769	1.52484	1.44708	1.30926	1.35094
689.375	1.43486	1.69737	1.68358	2.41376	2.69046	2.6531	1.41552	4.99991	2.37802	1.17123	1.21198	1.08397	1.17233	1.06487	1.0106	0.994429	1.31708	1.36039	1.14359	1.11678	1.04731	1.45836		621.221	1.15114	1.72121	1.30559	1.66991	1.64887	1.26033	2.11589	1.6086	1.97555	1.63195	1.17059	1.52228	1.45144	1.3389	1.341
690	1.39144	1.76478	1.71081	2.46958	2.70578	2.67371	1.44977	4.78197	2.21715	1.17328	1.24675	1.08505	1.17225	1.07109	1.00899	1.0168	1.28339	1.34881	1.14712	1.13822	1.0463	1.40652		621.784	1.1304	1.75222	1.33377	1.67387	1.62106	1.28946	1.99104	1.55802	1.94101	1.60197	1.17564	1.5242	1.46718	1.33637	1.34676
690.625	1.35885	1.81665	1.77821	2.46401	2.74068	2.65138	1.46024	4.52101	2.22114	1.18328	1.22962	1.09517	1.17675	1.09829	0.997168	1.0002	1.28561	1.37004	1.14573	1.12318	1.03212	1.39569		622.347	1.13001	1.74612	1.35237	1.70028	1.67996	1.26971	1.95866	1.559	1.93837	1.60481	1.16496	1.5208	1.48371	1.34254	1.34781
691.25	1.38571	1.81387	1.87783	2.55597	2.97852	2.73704	1.4298	4.60343	2.20243	1.20005	1.20956	1.117	1.19683	1.08128	0.986549	0.991332	1.29971	1.41361	1.1439	1.12152	1.01531	1.39271		622.91	1.17305	1.88153	1.33596	1.76002	1.66609	1.22009	2.01721	1.57447	2.02136	1.58078	1.1431	1.53008	1.48642	1.35211	1.38536
691.875	1.39544	1.79252	1.88013	2.64643	3.46732	2.69893	1.45052	5.02275	2.10119	1.21754	1.1818	1.1106	1.24378	1.06284	0.987395	0.987155	1.28708	1.42167	1.14845	1.11288	1.00799	1.39713		623.473	1.2351	1.9409	1.31275	1.77397	1.61332	1.19071	2.15619	1.60631	2.00435	1.61012	1.17268	1.5428	1.48014	1.34047	1.36731
692.5	1.4238	1.74554	1.83495	2.62894	3.92661	2.49482	1.48838	5.37417	2.08025	1.23694	1.16746	1.08766	1.22717	1.0663	0.985293	0.988235	1.28251	1.39528	1.14316	1.0979	0.995408	1.41295		624.037	1.23538	1.93726	1.28709	1.81731	1.66045	1.17186	2.36969	1.60346	1.82199	1.58499	1.1885	1.54555	1.48082	1.35928	1.3377
693.125	1.4719	1.7024	1.80279	2.65589	4.20011	2.38095	1.52048	5.45274	2.15046	1.25862	1.18308	1.09405	1.17906	1.07046	1.00803	1.00648	1.29475	1.3765	1.13915	1.10044	1.0192	1.40562		624.6	1.23268	1.94731	1.28352	1.87941	1.6972	1.15084	2.5116	1.64205	1.67015	1.62666	1.17368	1.55211	1.47385	1.36427	1.34444
693.75	1.50661	1.68747	1.76644	2.71471	4.5327	2.35363	1.51462	5.49709	2.31065	1.28072	1.23162	1.10336	1.14949	1.05112	1.00472	1.0242	1.31219	1.37909	1.13761	1.12019	1.06888	1.42282		625.163	1.23818	1.98149	1.29164	1.95624	1.6962	1.11616	2.58357	1.64132	1.57727	1.61671	1.1652	1.57674	1.46757	1.34885	1.36744
694.375	1.50773	1.69522	1.71233	2.56038	4.67087	2.32875	1.44697	5.87932	2.5228	1.26902	1.23098	1.11086	1.1413	1.05503	0.977421	1.0335	1.34228	1.36737	1.14083	1.11985	1.0953	1.42605		625.726	1.16984	2.07782	1.31529	2.03626	1.65867	1.11989	2.63742	1.60769	1.61465	1.59277	1.18304	1.57029	1.4649	1.35019	1.34354
695	1.5024	1.74863	1.64883	2.42857	4.16351	2.29527	1.47351	6.26928	2.60943	1.24628	1.22223	1.12275	1.13378	1.09557	0.976273	1.02697	1.34414	1.39187	1.14536	1.11158	1.072	1.42723		626.289	1.15747	2.1446	1.3063	2.18426	1.63468	1.12666	2.63445	1.57183	1.6332	1.60776	1.1513	1.57869	1.47035	1.32466	1.32809
695.625	1.44637	1.87018	1.58342	2.36503	3.7924	2.29572	1.61163	6.33318	2.54198	1.23043	1.24592	1.15409	1.11828	1.15228	0.99212	1.01735	1.33172	1.41753	1.1451	1.13211	1.04172	1.43397		626.853	1.15925	2.26152	1.31208	2.48183	1.60827	1.16608	2.51742	1.56134	1.62058	1.58585	1.1552	1.62062	1.48023	1.33967	1.33032
696.25	1.42605	1.9486	1.56784	2.28123	3.47845	2.30691	1.70606	6.06609	2.4997	1.22146	1.2526	1.1576	1.11435	1.22508	0.996593	1.04514	1.32785	1.40315	1.13869	1.13592	1.02722	1.42088		627.416	1.18493	2.58259	1.31985	2.69831	1.59337	1.1897	2.48546	1.57497	1.61737	1.60426	1.15404	1.62104	1.49915	1.32247	1.36145
696.875	1.44411	1.93291	1.5804	2.22099	3.38676	2.25143	1.73666	5.757	2.58552	1.2183	1.263	1.15278	1.12403	1.29185	1.00884	1.05102	1.36651	1.37529	1.13744	1.11057	1.02679	1.40462		627.979	1.15535	2.76153	1.31604	2.85331	1.55926	1.19606	2.49728	1.55403	1.64001	1.62952	1.15842	1.61326	1.50074	1.37581	1.34864
697.5	1.4529	1.91745	1.57517	2.11335	3.81471	2.20693	1.8213	5.40998	2.73533	1.21712	1.27734	1.11833	1.1281	1.16123	1.00676	1.01443	1.36924	1.38077	1.14407	1.10086	1.03766	1.39437		628.542	1.13786	2.70771	1.28957	2.67502	1.5277	1.18122	2.63603	1.5094	1.6185	1.64417	1.16942	1.64639	1.47606	1.34895	1.36956
698.125	1.44242	1.90484	1.61484	1.99992	4.23292	2.14313	2.01916	4.87084	2.93825	1.2031	1.2164	1.08582	1.14753	1.08339	0.999555	1.00965	1.33305	1.39409	1.14849	1.08821	1.05609	1.39167		629.106	1.10565	2.71602	1.29533	2.4642	1.52363	1.16315	2.72091	1.50398	1.58805	1.64244	1.16433	1.63276	1.45624	1.34906	1.35794
698.75	1.42456	1.89993	1.67045	1.9679	4.69589	2.50745	2.29123	4.5251	3.06172	1.18623	1.15935	1.07016	1.17964	1.08492	1.01798	1.00918	1.31844	1.37914	1.15669	1.08831	1.10694	1.39092		629.669	1.09466	2.67587	1.3567	2.47543	1.51967	1.15904	2.66492	1.4977	1.59152	1.65801	1.16646	1.6549	1.45137	1.36858	1.32859
699.375	1.42646	1.98352	1.68419	2.04321	4.82925	3.015	2.4082	4.4503	3.0428	1.18966	1.15114	1.07312	1.18706	1.06573	1.01967	1.0054	1.33856	1.35579	1.15565	1.10711	1.10181	1.3875		630.232	1.1199	2.5116	1.43625	2.68772	1.53477	1.1345	2.63111	1.51088	1.59374	1.65955	1.18639	1.68863	1.46638	1.37517	1.33051
700	1.48344	2.07815	1.66534	2.12448	4.29807	3.01549	2.27285	4.59026	3.05013	1.17902	1.15989	1.08357	1.19333	1.07139	1.00844	0.988082	1.33393	1.35134	1.15362	1.11351	1.04961	1.48201		630.795	1.16168	2.41857	1.55463	2.9654	1.53649	1.11529	2.66395	1.53924	1.58482	1.59387	1.21383	1.68472	1.47248	1.35134	1.32512
700.625	1.47148	2.18362	1.66428	2.18224	3.58913	2.77328	2.13866	4.84265	3.06413	1.19266	1.19593	1.09136	1.2047	1.0811	1.0077	0.986872	1.32332	1.34462	1.16997	1.14211	1.04933	1.51018		631.358	1.16972	2.37186	1.55768	3.12248	1.53501	1.10665	2.94686	1.59157	1.62006	1.63058	1.2301	1.66026	1.46422	1.37319	1.33972
701.25	1.3978	2.29555	1.74669	2.12942	3.20971	2.56923	1.81769	5.13407	3.07474	1.21658	1.17426	1.08908	1.19926	1.09609	1.01014	0.997527	1.34447	1.32218	1.17211	1.14733	1.03203	1.47017		631.922	1.19932	2.35258	1.41145	2.74254	1.55772	1.09382	3.07875	1.65724	1.70673	1.61148	1.25128	1.60942	1.47919	1.37004	1.29735
701.875	1.38097	2.3158	1.89008	2.12396	3.3277	2.43641	1.63579	5.46282	3.05012	1.21702	1.1687	1.07743	1.18475	1.10438	1.0119	1.02732	1.41598	1.32691	1.16196	1.12626	1.03046	1.44834		632.485	1.29034	2.22745	1.37447	2.34925	1.59481	1.07991	2.99812	1.63092	1.85265	1.62298	1.24054	1.54948	1.49316	1.33894	1.28775
702.5	1.39622	2.16417	1.99513	2.23739	3.57817	2.38894	1.5362	5.73958	2.90708	1.17705	1.16097	1.07916	1.17784	1.12316	0.996511	1.01693	1.41871	1.35762	1.15803	1.10286	1.05673	1.4261		633.048	1.35924	2.22623	1.33402	1.98867	1.56429	1.09759	2.79808	1.59717	1.92458	1.63187	1.2284	1.49875	1.50537	1.32511	1.29994
703.125	1.45041	2.00422	1.98027	2.43327	3.36111	2.38552	1.54179	6.14885	2.7428	1.13596	1.13758	1.07428	1.21732	1.12536	0.980196	1.02233	1.38224	1.37087	1.15386	1.10768	1.05337	1.3941		633.611	1.43132	2.27365	1.30755	1.82796	1.49494	1.13141	2.73384	1.59597	1.81614	1.58564	1.23121	1.5082	1.50566	1.29822	1.32306
703.75	1.502	2.00046	1.92167	2.56182	3.15971	2.54132	1.59041	6.19931	2.69323	1.13318	1.12783	1.08219	1.2133	1.11962	0.973411	1.01987	1.35414	1.3746	1.15882	1.13302	1.051	1.36535		634.174	1.43326	2.16194	1.30882	1.76444	1.45337	1.12653	2.78752	1.58412	1.69863	1.61464	1.22939	1.54216	1.48422	1.30679	1.29289
704.375	1.49061	2.05066	1.86158	2.48232	3.01535	2.93731	1.67521	5.63792	2.63955	1.13505	1.12934	1.07105	1.18231	1.10001	0.971061	1.00379	1.35761	1.37166	1.15795	1.11212	1.05071	1.36338		634.738	1.41814	2.09397	1.35392	1.82137	1.43342	1.09775	2.89553	1.6019	1.61441	1.62952	1.1915	1.55815	1.4781	1.327	1.3023
705	1.46452	2.13587	1.83776	2.38736	2.89493	3.15204	1.62456	5.21745	2.60996	1.13788	1.16241	1.06164	1.15276	1.10224	0.962905	0.997673	1.40165	1.36562	1.14202	1.10601	1.06039	1.36491		635.301	1.43394	2.10071	1.38727	1.83699	1.46138	1.08712	2.87879	1.62364	1.6253	1.60179	1.18946	1.55008	1.48985	1.34473	1.34162
705.625	1.44597	2.14363	1.89183	2.42759	2.79667	3.03096	1.55908	5.28107	2.54183	1.15146	1.1498	1.07288	1.12264	1.12796	0.975255	0.994194	1.42436	1.37875	1.13986	1.09159	1.08357	1.3945		635.864	1.45867	2.07546	1.37363	1.84512	1.56801	1.09424	2.6977	1.58972	1.65728	1.5666	1.20795	1.56903	1.4838	1.42221	1.34086
706.25	1.45277	2.13913	2.12948	2.5072	2.8009	2.72713	1.54344	5.31717	2.41082	1.1626	1.11348	1.07481	1.11521	1.12596	1.00025	1.01037	1.42823	1.3708	1.16102	1.07946	1.09092	1.40766		636.427	1.55515	2.07914	1.3457	1.87857	1.67058	1.09203	2.52146	1.53686	1.69086	1.5519	1.25844	1.59006	1.48933	1.43524	1.3773
706.875	1.46162	2.20772	2.52739	2.52684	2.7182	2.50039	1.62513	5.17719	2.2661	1.16486	1.10722	1.1178	1.12769	1.11733	1.00468	1.02375	1.45425	1.34443	1.15753	1.09153	1.05172	1.392		636.99	1.57594	2.14698	1.33288	1.93667	1.7578	1.06675	2.52314	1.52432	1.72244	1.53905	1.33942	1.58106	1.50781	1.3957	1.36639
707.5	1.45611	2.21486	2.83485	2.61055	2.5744	2.37016	1.77374	5.11349	2.20918	1.15511	1.12362	1.08989	1.15574	1.11404	0.990416	1.03485	1.49637	1.3162	1.13849	1.08159	1.04531	1.39356		637.554	1.49123	2.11399	1.3771	2.05625	1.75039	1.07596	2.68841	1.51117	1.74937	1.57451	1.26686	1.56874	1.51196	1.35963	1.34603
708.125	1.44245	2.27716	2.81937	2.81443	2.48546	2.43282	1.84527	5.05092	2.25833	1.14365	1.14647	1.07366	1.10603	1.10141	0.993928	1.01823	1.49857	1.31567	1.14168	1.07313	1.02715	1.37714		638.117	1.42271	2.08705	1.3692	2.1756	1.67604	1.08228	3.07503	1.51194	1.78741	1.57221	1.21616	1.55904	1.5085	1.33458	1.3298
708.75	1.43468	2.32824	2.60551	3.14694	2.50992	2.3988	1.73283	5.066	2.47262	1.14668	1.14382	1.07777	1.06913	1.10167	1.00616	1.01	1.47167	1.35379	1.14621	1.07408	1.04924	1.39199		638.68	1.41796	2.11891	1.26966	2.10603	1.58212	1.08578	3.24766	1.49741	1.77425	1.58307	1.19964	1.56181	1.49613	1.34901	1.31304
709.375	1.41509	2.26558	2.55479	2.79989	2.61157	2.29776	1.68903	5.63959	2.91589	1.16791	1.13017	1.07991	1.07219	1.08298	0.999803	1.00208	1.44092	1.38542	1.14784	1.06947	1.07594	1.39468		639.243	1.42902	2.08849	1.22651	2.14101	1.50751	1.09166	2.92169	1.52916	1.75855	1.58539	1.17741	1.58524	1.49347	1.36116	1.30285
710	1.43476	2.24096	2.58731	2.42316	2.64656	2.25072	1.75369	6.34953	3.36189	1.18404	1.13245	1.08849	1.07627	1.07875	0.98415	1.01252	1.44178	1.40141	1.14078	1.03615	1.05588	1.38155		639.807	1.36497	2.08943	1.24172	2.03193	1.46842	1.0938	2.7198	1.53724	1.76879	1.54958	1.19422	1.57198	1.48852	1.36567	1.29528
710.625	1.47213	2.31054	2.6607	2.25063	2.72339	2.29503	1.83044	6.59546	3.4057	1.20691	1.14464	1.102	1.09148	1.08211	0.978552	1.01798	1.43583	1.42039	1.1375	1.04907	1.03424	1.34835		640.37	1.26389	2.08975	1.24929	1.98995	1.46339	1.10417	2.62413	1.55714	1.78207	1.53419	1.20091	1.5463	1.49039	1.37119	1.32071
711.25	1.48151	2.41036	3.04384	2.09707	2.84587	2.474	1.92502	6.4789	3.05927	1.22091	1.1211	1.09039	1.10637	1.08073	0.982027	1.01252	1.40781	1.4473	1.13848	1.06336	1.05604	1.34732		640.933	1.17561	2.09113	1.23362	1.90717	1.4171	1.11723	2.58582	1.58548	1.77337	1.54574	1.19887	1.51718	1.49662	1.35094	1.3291
711.875	1.63878	2.38833	3.55842	2.04653	2.92365	2.47773	2.03047	6.2607	2.73415	1.23968	1.11739	1.10651	1.12401	1.08433	0.991041	1.01322	1.38706	1.49126	1.14531	1.03886	1.07395	1.36379		641.496	1.10833	2.05587	1.23872	1.7929	1.40542	1.13014	2.51052	1.65813	1.74944	1.55322	1.18061	1.53837	1.49813	1.31217	1.34184
712.5	1.69596	2.32252	3.82841	2.02063	2.96775	2.23348	2.08418	6.17438	2.57864	1.26489	1.13518	1.09752	1.12206	1.08381	0.985418	1.01348	1.37475	1.57756	1.1393	1.0596	1.0773	1.36884		642.059	1.11815	2.04345	1.24884	1.72619	1.39457	1.13794	2.47344	1.64637	1.77709	1.57664	1.21219	1.56675	1.50026	1.30285	1.32229
713.125	1.55015	2.35042	3.98187	2.0838	2.95271	2.07268	2.02451	6.04161	2.60686	1.25868	1.15082	1.0875	1.09109	1.0922	0.978804	1.02666	1.33677	1.65479	1.14609	1.08764	1.05232	1.36959		642.623	1.15466	2.04462	1.26211	1.73461	1.39591	1.14809	2.44354	1.62039	1.93134	1.59442	1.20752	1.58559	1.50015	1.30979	1.27993
713.75	1.51781	2.39857	4.0883	2.12383	2.7541	2.09016	1.91261	5.81611	2.63365	1.24587	1.14179	1.06965	1.06611	1.09466	0.987806	1.04351	1.32531	1.57991	1.15816	1.10132	1.03941	1.38466		643.186	1.16005	2.01654	1.25218	1.72586	1.38198	1.18825	2.57323	1.60696	2.12072	1.60552	1.17698	1.58435	1.50399	1.32564	1.286
714.375	1.63693	2.35782	3.6931	2.22108	2.64563	2.1047	1.86319	5.65956	2.56426	1.25281	1.1464	1.05848	1.06825	1.12761	0.981515	1.0404	1.30682	1.48789	1.17527	1.09237	1.04833	1.37739		643.749	1.14339	2.15059	1.27535	1.74243	1.36632	1.25301	2.67718	1.60946	2.0836	1.59359	1.20082	1.60177	1.49087	1.34797	1.28096
715	1.68416	2.12227	3.23505	2.44976	2.66978	2.18645	1.86322	5.57991	2.52885	1.25141	1.13279	1.06232	1.06184	1.1593	0.97343	1.05433	1.28685	1.41675	1.18825	1.07514	1.07301	1.38014		644.312	1.10752	2.125	1.24629	1.73999	1.36849	1.29652	2.62661	1.57358	1.89439	1.58973	1.17371	1.6278	1.47881	1.35161	1.28867
715.625	1.66729	1.91683	2.91881	2.5272	2.54041	2.24615	1.88318	5.42282	2.45056	1.25261	1.12227	1.05919	1.06209	1.15428	0.98075	1.04878	1.30572	1.3712	1.17399	1.09475	1.12179	1.41794		644.875	1.10046	2.11518	1.23787	1.76123	1.38553	1.24695	2.57108	1.59709	1.82002	1.57508	1.17011	1.6226	1.47849	1.31792	1.31318
716.25	1.69052	1.87884	2.8663	2.31087	2.4753	2.33128	1.91664	5.55835	2.37055	1.27016	1.11208	1.08141	1.07964	1.11511	0.988085	1.04091	1.29866	1.35506	1.16983	1.08481	1.12568	1.37559		645.439	1.14711	2.16046	1.2345	1.83526	1.39441	1.18283	2.61517	1.60017	1.87048	1.58628	1.15685	1.60742	1.48604	1.30915	1.33537
716.875	1.77557	1.77146	2.97145	2.1571	2.51889	2.42156	1.86685	5.87089	2.38516	1.29226	1.11098	1.08339	1.08794	1.11041	1.00466	1.00664	1.29183	1.38328	1.1837	1.06517	1.06066	1.3432		646.002	1.1241	2.24335	1.24765	1.85687	1.42407	1.16322	2.66048	1.57312	1.91588	1.55196	1.17027	1.57474	1.48752	1.30469	1.33794
717.5	1.74266	1.64754	2.91937	2.14738	2.5467	2.45177	1.8173	5.22832	2.45885	1.30343	1.13205	1.09418	1.09653	1.10004	1.01259	0.999794	1.31875	1.43959	1.19881	1.05188	1.07655	1.32723		646.565	1.09301	2.31725	1.23591	1.87768	1.42955	1.16966	2.58082	1.56556	1.82701	1.56103	1.20732	1.56491	1.50293	1.32399	1.32224
718.125	1.61308	1.54443	2.80345	2.23823	2.63567	2.28904	1.83906	4.50546	2.42422	1.28336	1.15008	1.09042	1.1252	1.07247	1.02422	1.00577	1.38301	1.49279	1.18895	1.06475	1.09942	1.33908		647.128	1.05785	2.42597	1.22138	1.92576	1.44436	1.17415	2.46589	1.58741	1.8817	1.57493	1.25765	1.53349	1.52029	1.33798	1.31878
718.75	1.55786	1.49828	2.69311	2.29359	2.91587	2.07937	1.95315	4.08241	2.3192	1.25056	1.1591	1.0677	1.14195	1.05897	1.01362	1.01056	1.50688	1.5147	1.16405	1.05701	1.06796	1.32341		647.691	1.03525	2.47851	1.22398	1.93464	1.45684	1.17627	2.48017	1.62575	2.10583	1.55624	1.23896	1.53651	1.51367	1.32442	1.32951
719.375	1.58902	1.50163	2.63439	2.21927	3.13324	2.15691	1.93794	3.77544	2.2019	1.22607	1.12512	1.07056	1.1274	1.07187	1.01141	1.02128	1.62717	1.54078	1.15887	1.04349	1.04871	1.31262		648.255	1.02047	2.59824	1.25389	1.90809	1.47771	1.17669	2.46872	1.61805	2.30225	1.55967	1.19324	1.53075	1.49992	1.32099	1.35762
720	1.65374	1.5006	2.60366	2.17959	3.13769	2.33401	1.89132	3.54743	2.14041	1.19401	1.11413	1.08499	1.13433	1.0818	0.991357	1.01068	1.53128	1.54854	1.15926	1.06133	1.0529	1.32094		648.818	1.04529	2.80089	1.3037	1.93604	1.47775	1.17823	2.3981	1.60905	2.53488	1.54435	1.17549	1.52706	1.4972	1.35201	1.30499
720.625	1.61566	1.52595	2.47894	2.08945	3.24357	2.35513	1.85059	3.43842	2.07391	1.17819	1.13414	1.0738	1.16415	1.09122	0.990876	1.00877	1.41028	1.52932	1.1534	1.08551	1.04612	1.34346		649.381	1.06312	2.80846	1.40274	1.8882	1.45693	1.18279	2.31141	1.60081	2.67939	1.52696	1.17411	1.52161	1.50073	1.32457	1.3483
721.25	1.67377	1.5604	2.34139	2.08785	3.09996	2.30295	1.83553	3.49674	2.10626	1.17074	1.12486	1.05545	1.18581	1.07977	0.995974	1.00819	1.34527	1.54879	1.14921	1.09851	1.04765	1.35661		649.944	1.03101	2.81321	1.41145	1.81908	1.45111	1.18784	2.29026	1.58623	2.68206	1.54847	1.16672	1.57192	1.50337	1.305	1.35272
721.875	1.74748	1.64211	2.26374	2.18229	3.12375	2.22226	1.85623	3.47726	2.21851	1.16734	1.1222	1.03815	1.17744	1.0788	1.00435	0.998086	1.32016	1.53904	1.16582	1.09882	1.05335	1.39219		650.508	1.0432	2.71087	1.31858	1.71998	1.43599	1.17803	2.30453	1.56697	2.42475	1.54772	1.15845	1.59744	1.50565	1.33152	1.32759
722.5	1.80168	1.70696	2.19364	2.32195	3.33214	2.1639	1.79201	3.51778	2.27483	1.16336	1.13889	1.05201	1.1696	1.08276	1.0035	0.983962	1.32612	1.48959	1.18403	1.10717	1.04092	1.36512		651.071	1.05384	2.59415	1.26469	1.65701	1.4337	1.16465	2.33301	1.56213	2.17051	1.53114	1.13075	1.58884	1.51133	1.34668	1.32857
723.125	1.82105	1.75511	2.17151	2.29213	3.78095	2.08974	1.75009	3.8765	2.29462	1.15644	1.1512	1.05655	1.1409	1.08012	0.996776	0.980642	1.32245	1.44888	1.18482	1.09858	1.04869	1.36727		651.634	1.03983	2.46108	1.23139	1.61821	1.46337	1.15375	2.47922	1.56963	2.0182	1.51687	1.16465	1.5872	1.52794	1.36107	1.36463
723.75	1.82287	1.75117	2.20338	2.17146	4.19149	2.05482	1.78141	3.96514	2.30535	1.16301	1.16087	1.06571	1.11683	1.05877	1.01096	0.999691	1.37654	1.41116	1.19967	1.10713	1.0167	1.36188		652.197	1.00266	2.50298	1.21033	1.59172	1.47458	1.14865	2.62127	1.57708	1.95032	1.53783	1.19508	1.58056	1.53275	1.36932	1.36554
724.375	1.8264	1.78585	2.30222	2.06333	4.51269	2.01751	1.79984	3.92789	2.30277	1.19937	1.14867	1.06387	1.10864	1.06573	1.01532	1.00923	1.40797	1.39972	1.23289	1.08019	1.04091	1.33961		652.76	0.990525	2.58064	1.22705	1.56254	1.46552	1.14906	2.58706	1.58993	1.90418	1.52902	1.19208	1.56839	1.53905	1.38455	1.31949
725	1.96947	1.78549	2.56305	2.06203	4.9728	2.00776	1.84475	4.02807	2.29193	1.22121	1.13467	1.06363	1.09291	1.0662	0.992734	1.0032	1.40807	1.42506	1.20711	1.07533	1.0411	1.33179		653.324	1.02543	2.39864	1.28269	1.57429	1.47679	1.18088	2.49286	1.61103	1.85016	1.56583	1.17983	1.60224	1.54173	1.38338	1.27252
725.625	2.07564	1.73764	2.74229	2.11843	4.70883	2.00513	1.90127	4.06132	2.28028	1.20769	1.17558	1.04771	1.09169	1.06015	0.976607	1.01103	1.36238	1.45195	1.18099	1.07252	1.04897	1.31915		653.887	1.04786	2.21475	1.36772	1.59256	1.47925	1.22043	2.342	1.60862	1.94057	1.56409	1.17498	1.58751	1.52576	1.35974	1.30493
726.25	2.03675	1.76756	2.6876	2.1178	4.13026	1.99313	1.99371	4.19959	2.28699	1.16975	1.25107	1.05148	1.11328	1.07915	0.984212	1.02208	1.32465	1.48055	1.17713	1.07511	1.05852	1.35864		654.45	1.01863	2.00553	1.41193	1.58786	1.43694	1.24605	2.23519	1.61196	1.91756	1.56714	1.18178	1.54271	1.51877	1.36503	1.32025
726.875	2.08395	1.82412	2.64804	2.06989	3.53885	2.02282	1.88917	4.34351	2.17984	1.13766	1.33624	1.06337	1.13671	1.09196	0.984989	1.0094	1.30623	1.51601	1.18097	1.09018	1.06452	1.40319		655.013	1.04303	1.98874	1.35283	1.53642	1.44447	1.23699	2.14112	1.60603	1.88938	1.59388	1.17479	1.57319	1.51525	1.35138	1.32016
727.5	2.04122	1.81325	2.70994	2.04743	3.27908	2.098	1.81856	4.43263	2.0586	1.12435	1.42136	1.06357	1.14216	1.08465	0.990339	0.991996	1.32826	1.54425	1.17175	1.09257	1.0648	1.42848		655.576	1.04973	2.14308	1.33366	1.51345	1.45839	1.20459	2.08553	1.60926	1.85722	1.6119	1.18122	1.61169	1.51225	1.37105	1.30559
728.125	2.01765	1.64001	2.89476	2.01896	3.28789	2.1716	1.76309	4.5883	2.02733	1.12049	1.46207	1.06815	1.13041	1.0803	0.993068	0.996296	1.3369	1.49451	1.16676	1.10586	1.06216	1.45934		656.14	1.03063	2.41796	1.35101	1.52279	1.48923	1.18726	2.10737	1.59781	1.99025	1.55645	1.16405	1.57384	1.51681	1.34972	1.31917
728.75	2.00204	1.58288	2.93704	1.98205	3.45704	2.1638	1.71531	4.69701	1.94086	1.13194	1.30338	1.08393	1.12535	1.07925	0.985887	1.01693	1.30534	1.43012	1.17223	1.09501	1.05372	1.44232		656.703	1.06097	2.4612	1.37059	1.52772	1.53994	1.18088	2.15979	1.5825	2.01404	1.55335	1.17433	1.53933	1.52629	1.33929	1.311
729.375	1.99097	1.59669	2.9171	1.97984	3.75636	2.14616	1.70313	5.19067	1.83772	1.15007	1.20155	1.07595	1.14079	1.09494	0.978723	1.03984	1.2978	1.3879	1.18032	1.0879	1.03794	1.46059		657.266	1.08944	2.22249	1.36703	1.47509	1.55385	1.20576	2.11442	1.60883	2.008	1.55629	1.18754	1.53546	1.51434	1.31903	1.29193
730	2.01429	1.63533	2.88962	1.97894	3.97495	2.17923	1.75275	5.87934	1.78625	1.14292	1.20639	1.06867	1.11492	1.09526	0.973069	1.04954	1.3091	1.36948	1.17925	1.07106	1.07629	1.69945		657.829	1.06797	2.03361	1.34681	1.48381	1.54093	1.21182	2.023	1.66769	2.02537	1.56403	1.20345	1.54976	1.49575	1.33736	1.29789
730.625	2.0025	1.73099	2.72417	1.95177	3.89963	2.13257	1.72958	5.97172	1.75663	1.13824	1.20192	1.06048	1.08768	1.071	0.979784	1.0581	1.31785	1.36967	1.20407	1.07648	1.06357	1.67612		658.392	1.03233	2.0779	1.31166	1.54922	1.53899	1.23817	1.93956	1.72362	2.05847	1.59935	1.24926	1.54845	1.48627	1.36437	1.30293
731.25	1.98907	1.76926	2.42058	1.96214	3.72192	2.15787	1.67134	6.1249	1.74861	1.15195	1.16894	1.07366	1.08146	1.0581	1.00672	1.03784	1.37399	1.39846	1.21516	1.0934	1.04851	1.55709		658.956	1.01732	2.09878	1.314	1.58376	1.51736	1.26404	1.91213	1.70514	1.97222	1.57961	1.21113	1.53718	1.48945	1.40735	1.29873
731.875	2.11457	1.71528	2.22759	2.00626	3.597	2.1621	1.56524	6.43778	1.77296	1.159	1.14117	1.08228	1.07693	1.07039	1.02602	1.0219	1.41137	1.42754	1.20204	1.09497	1.04932	1.55705		659.519	1.02016	2.0084	1.30426	1.59049	1.52694	1.2888	1.85471	1.61734	1.89546	1.60901	1.22249	1.53801	1.50167	1.39119	1.34446
732.5	2.17301	1.62109	2.17904	2.10395	3.66466	2.16163	1.54864	6.53568	1.77977	1.16163	1.1262	1.10087	1.07689	1.09895	1.02238	1.02194	1.35925	1.44597	1.1985	1.09701	1.04554	1.42677		660.082	1.02447	1.85131	1.3064	1.54161	1.54919	1.3325	1.8713	1.54887	1.83801	1.58579	1.18401	1.56369	1.50935	1.35186	1.32315
733.125	2.27087	1.59939	2.12481	2.2415	3.70138	2.28487	1.65048	6.51893	1.79224	1.1649	1.13517	1.10444	1.07927	1.09049	1.02225	1.03328	1.34156	1.4523	1.1981	1.11133	1.06117	1.35607		660.645	1.06442	1.82735	1.32354	1.50773	1.56739	1.35578	1.92905	1.50075	1.78225	1.52952	1.19341	1.55985	1.51093	1.32366	1.25003
733.75	2.49711	1.59797	2.05146	2.38258	3.54743	2.33633	1.8232	6.52017	1.82026	1.17411	1.14359	1.09885	1.07173	1.09076	1.02266	1.04688	1.32781	1.44622	1.18796	1.0887	1.04854	1.35267		661.208	1.03999	1.80357	1.33746	1.49504	1.60883	1.37794	1.91118	1.46134	1.74627	1.51437	1.19448	1.54857	1.50833	1.30855	1.27323
734.375	2.77649	1.54701	2.08015	2.32933	3.50313	2.27296	2.06268	6.27375	1.8542	1.18048	1.15477	1.09849	1.08255	1.09981	1.00836	1.04243	1.3073	1.40405	1.18177	1.12147	1.01655	1.35205		661.772	1.03808	1.75777	1.28394	1.47845	1.64301	1.40392	1.97676	1.43877	1.65547	1.55834	1.19502	1.506	1.48765	1.3702	1.30272
735	3.26822	1.5665	2.22176	2.48858	3.74119	2.04776	2.35511	5.88522	1.90511	1.20005	1.17172	1.10434	1.12106	1.1148	0.99797	1.02573	1.30969	1.34142	1.1824	1.13114	1.03534	1.34794		662.335	1.0705	1.77878	1.25184	1.49931	1.6864	1.36748	2.00538	1.42135	1.58463	1.56349	1.19336	1.48995	1.49296	1.38794	1.3102
735.625	3.23799	1.57144	2.52245	2.51567	3.90956	1.98718	2.80094	5.6704	1.94322	1.21594	1.17978	1.08503	1.10772	1.12036	0.988368	1.01467	1.33832	1.3234	1.19013	1.11252	1.07716	1.37561		662.898	1.08971	1.8114	1.23242	1.53581	1.75592	1.3972	1.9681	1.42984	1.57994	1.60367	1.16826	1.48372	1.50496	1.35913	1.3121
736.25	2.95863	1.57789	2.78302	2.4395	3.94252	1.89561	2.59847	5.61253	1.93032	1.20567	1.17867	1.09146	1.10947	1.13671	1.00152	1.02263	1.34993	1.33907	1.18379	1.12621	1.06412	1.3685		663.461	1.04848	1.85516	1.24148	1.52654	1.82508	1.44903	2.06839	1.41431	1.59814	1.57822	1.18929	1.47343	1.53175	1.33757	1.30822
736.875	2.80083	1.61994	2.83222	2.46678	3.98594	1.82519	2.13458	5.44284	1.86854	1.19772	1.1881	1.12565	1.13722	1.14531	1.01699	1.02928	1.31159	1.36025	1.18378	1.0801	1.07689	1.34458		664.025	1.03818	1.76321	1.22372	1.46346	1.78917	1.46989	2.22924	1.39771	1.58731	1.57736	1.22599	1.494	1.55704	1.30956	1.29628
737.5	2.85331	1.74913	2.66125	2.31602	3.95438	1.8415	1.87549	5.19819	1.78636	1.21591	1.18954	1.1164	1.15135	1.1165	1.01581	1.02458	1.26595	1.38424	1.18808	1.09583	1.118	1.33379		664.588	1.01646	1.65573	1.22689	1.40797	1.74321	1.56619	2.33793	1.36113	1.57639	1.53585	1.23389	1.4785	1.57239	1.29088	1.30728
738.125	2.67513	1.90695	2.55714	2.3251	3.93421	1.8705	1.77192	5.2007	1.71232	1.23544	1.19547	1.1126	1.11918	1.06443	1.00214	1.03394	1.26193	1.38526	1.1885	1.09443	1.09798	1.35258		665.151	0.998314	1.61966	1.22059	1.45233	1.71775	1.72946	2.50948	1.3577	1.62612	1.52849	1.22391	1.47188	1.58951	1.30162	1.32509
738.75	2.48093	2.10045	2.56147	2.47796	3.80825	1.96791	1.74142	5.33864	1.64057	1.22185	1.19109	1.10291	1.08746	1.0572	0.986966	1.01871	1.25796	1.34275	1.1781	1.09207	1.07676	1.35979		665.714	1.00753	1.59408	1.22558	1.57907	1.64989	1.95975	2.54566	1.3411	1.69943	1.5509	1.21603	1.50003	1.57116	1.30264	1.33764
739.375	2.4346	2.37317	2.57271	2.40895	3.67617	2.05197	1.73593	5.52089	1.59287	1.2037	1.1976	1.11043	1.06938	1.06264	0.997692	0.997306	1.26426	1.3134	1.16755	1.07484	1.05708	1.36018		666.277	1.0219	1.60916	1.22465	1.63439	1.64252	1.79536	2.42077	1.33583	1.76605	1.57266	1.1999	1.51458	1.53078	1.32005	1.35685
740	2.42388	2.59317	2.56739	2.42099	3.50195	2.04725	1.73366	5.5006	1.55984	1.1948	1.22314	1.13184	1.07055	1.07445	1.0042	1.00399	1.30314	1.33487	1.16606	1.09082	1.08766	1.35553		666.841	1.01904	1.68994	1.22642	1.65085	1.65066	1.55685	2.4013	1.33587	1.81464	1.55243	1.20813	1.51808	1.50811	1.33511	1.34317
740.625	2.3164	2.65201	2.44107	2.42345	3.79788	2.00876	1.80586	5.35246	1.56168	1.19068	1.22414	1.12357	1.08027	1.07654	0.981958	0.999954	1.35709	1.35619	1.16722	1.08288	1.0662	1.33624		667.404	1.01612	1.66046	1.27042	1.70852	1.61362	1.40159	2.4558	1.33508	1.8096	1.51836	1.21677	1.5339	1.4964	1.32622	1.34408
741.25	2.26201	2.51301	2.33864	2.46441	4.0756	1.8439	1.84161	5.37651	1.56224	1.19784	1.22739	1.12574	1.08462	1.06431	0.976632	1.01544	1.38976	1.34703	1.16214	1.06397	1.08048	1.35735		667.967	0.99178	1.63933	1.2853	1.82254	1.60584	1.39729	2.40136	1.32856	1.76936	1.55096	1.2065	1.52264	1.5003	1.37435	1.33269
741.875	2.38189	2.50154	2.25441	2.30362	4.31769	1.69185	1.87711	5.55346	1.59235	1.21826	1.25958	1.13667	1.08198	1.06696	0.99492	1.03296	1.39002	1.32893	1.17922	1.07179	1.06824	1.36484		668.53	0.964572	1.61871	1.27607	1.92739	1.59132	1.48156	2.39005	1.32999	1.71956	1.56803	1.20435	1.50812	1.52214	1.39663	1.30902
742.5	2.60736	2.48765	2.23414	2.13524	4.53792	1.59585	1.76521	5.96044	1.67437	1.22177	1.23555	1.12787	1.09928	1.08848	1.01097	1.01741	1.35821	1.32082	1.18633	1.07281	1.08101	1.37087		669.093	0.942698	1.66654	1.27888	1.89456	1.61404	1.56294	2.34434	1.34303	1.72647	1.58467	1.19623	1.50419	1.54482	1.33834	1.30233
743.125	2.90854	2.4997	2.18092	2.0671	4.70611	1.52853	1.61755	6.80279	1.82671	1.21524	1.24893	1.10595	1.12932	1.08534	1.01758	1.0096	1.33616	1.3189	1.18107	1.08462	1.04461	1.39428		669.657	0.957803	1.69352	1.30375	1.7965	1.82109	1.55343	2.347	1.35184	1.73406	1.60525	1.20569	1.49779	1.5464	1.35123	1.30786
743.75	3.12742	2.56077	2.07323	2.0289	4.85353	1.5208	1.55433	7.3917	1.93984	1.20804	1.25045	1.09461	1.17582	1.09199	1.00585	1.01565	1.33882	1.31768	1.17992	1.12844	1.03449	1.39094		670.22	0.989947	1.75629	1.27508	1.82254	2.03775	1.50468	2.40766	1.36691	1.70753	1.61979	1.221	1.4969	1.54804	1.33566	1.32005
744.375	3.21325	2.59938	2.02331	2.00153	4.93489	1.53983	1.55973	7.22747	1.77713	1.20733	1.22779	1.09158	1.20509	1.09312	0.99737	1.03257	1.32356	1.30344	1.18428	1.13023	1.03088	1.41422		670.783	0.992945	1.73909	1.25889	1.72671	1.89504	1.40763	2.30224	1.39439	1.64646	1.60533	1.22296	1.45788	1.55061	1.35479	1.35928
745	2.98123	2.43172	2.0075	2.09458	4.74488	1.54257	1.58178	6.62354	1.61961	1.2143	1.24024	1.08251	1.21765	1.09954	1.00819	1.03791	1.32812	1.3087	1.19109	1.12724	1.03661	1.43613		671.346	1.01544	1.71032	1.28026	1.53777	1.73948	1.34569	2.23214	1.42826	1.54596	1.58609	1.23665	1.45994	1.54392	1.35101	1.35423
745.625	2.89799	2.2205	1.99584	2.35294	4.42373	1.48145	1.61844	6.23386	1.56952	1.21496	1.24735	1.09452	1.18372	1.09346	1.01356	1.03459	1.32815	1.31622	1.18064	1.1107	1.0621	1.45479		671.909	0.979594	1.62275	1.29859	1.43984	1.75181	1.32252	2.14932	1.43411	1.49287	1.58514	1.23249	1.44112	1.5476	1.37016	1.31336
746.25	3.10475	2.21366	2.06592	2.64112	4.01512	1.44392	1.63725	5.65635	1.55834	1.21549	1.23449	1.1226	1.14821	1.0867	1.01661	1.02979	1.3314	1.3168	1.17602	1.09296	1.06909	1.42844		672.473	0.985023	1.6197	1.26959	1.36438	1.82231	1.29817	2.12577	1.42351	1.49647	1.57832	1.18929	1.4123	1.57096	1.38015	1.28648
746.875	2.98816	2.32425	2.20945	2.59044	3.83667	1.42993	1.61265	5.17657	1.55582	1.21602	1.20131	1.10181	1.12085	1.08715	1.00957	1.04161	1.33621	1.30594	1.17752	1.07846	1.05626	1.40567		673.036	0.986281	1.60656	1.24383	1.35927	1.89933	1.26817	2.10784	1.40848	1.5271	1.58278	1.18957	1.40791	1.58994	1.39727	1.27976
747.5	2.80301	2.40229	2.29015	2.56412	3.91527	1.45729	1.65752	5.04716	1.54439	1.2197	1.2121	1.09944	1.13452	1.07441	0.98137	1.0292	1.31713	1.28269	1.18611	1.06874	1.06375	1.40664		673.599	1.05012	1.63392	1.25935	1.34152	1.86083	1.25971	2.15521	1.3946	1.59358	1.59491	1.19969	1.38806	1.59361	1.4109	1.29613
748.125	2.46243	2.38932	2.20647	2.57422	4.08437	1.51221	1.70551	5.10082	1.54266	1.20143	1.24515	1.09293	1.15744	1.07254	0.986341	1.01152	1.3102	1.28621	1.18232	1.09416	1.09509	1.4393		674.162	1.09153	1.68475	1.2592	1.2972	1.785	1.26536	2.28353	1.38229	1.59348	1.60459	1.21919	1.38444	1.59069	1.37634	1.28444
748.75	2.32116	2.21912	2.03755	2.49002	4.19175	1.54789	1.68786	5.32605	1.5415	1.18356	1.23919	1.09765	1.14717	1.07248	0.996884	1.00145	1.29685	1.30632	1.18171	1.12773	1.07476	1.43275		674.726	1.16283	1.76692	1.22806	1.29303	1.78502	1.28196	2.38073	1.36991	1.60085	1.5951	1.221	1.3812	1.58866	1.40607	1.2987
749.375	2.42949	2.12859	1.94199	2.35342	4.14481	1.49463	1.66518	5.28813	1.56016	1.18635	1.21562	1.11174	1.12702	1.07314	0.987081	0.999995	1.31183	1.33839	1.19363	1.07198	1.07658	1.43197		675.289	1.31339	1.96525	1.23156	1.31285	1.85131	1.27888	2.4453	1.37555	1.53849	1.62266	1.24052	1.37672	1.58211	1.40004	1.3143
750	2.73299	2.21498	1.92435	2.24029	4.25385	1.46412	1.64581	5.05528	1.56815	1.18795	1.20929	1.12366	1.12149	1.05124	0.978729	0.998018	1.31054	1.38211	1.19086	1.05259	1.07383	1.45499		675.852	1.40022	2.11221	1.24344	1.34923	1.91735	1.27768	2.4198	1.36733	1.52463	1.61847	1.22136	1.40186	1.58721	1.36646	1.30997
750.625	3.33378	2.32247	1.91857	2.21521	4.49652	1.40945	1.66561	4.87459	1.55823	1.17668	1.22713	1.13095	1.12914	1.04096	0.997655	0.995972	1.30971	1.45116	1.18447	1.0534	1.05881	1.48112		676.415	1.30791	1.96208	1.25893	1.38431	1.8217	1.27466	2.41315	1.37255	1.53257	1.59035	1.22532	1.40071	1.60797	1.37154	1.30397
751.25	3.27139	2.26691	1.92812	2.15181	4.49481	1.39204	1.85545	4.71971	1.54707	1.17555	1.29219	1.12175	1.1285	1.04217	1.00549	1.01148	1.32637	1.52463	1.18741	1.06294	1.06774	1.50907		676.978	1.23053	1.86633	1.24473	1.39054	1.83016	1.26967	2.47245	1.35424	1.51493	1.59692	1.21833	1.41243	1.6117	1.35897	1.30589
751.875	3.05612	2.18303	1.9229	2.07905	4.35841	1.37653	2.12873	4.92616	1.56576	1.18745	1.35039	1.14069	1.11145	1.04392	1.00821	1.03779	1.34136	1.52031	1.18026	1.06472	1.05176	1.53897		677.542	1.18658	1.81098	1.24511	1.36774	1.88871	1.26256	2.54545	1.33412	1.49439	1.58065	1.19083	1.41185	1.58478	1.34803	1.30226
752.5	2.87687	2.15695	1.87324	1.92432	4.05828	1.39288	2.2701	5.11981	1.7099	1.21188	1.33804	1.1485	1.10702	1.04383	1.00796	1.04063	1.33573	1.4539	1.17033	1.10585	1.01243	1.5376		678.105	1.16009	1.83414	1.21292	1.35976	1.90591	1.26147	2.54911	1.32436	1.50728	1.60064	1.1732	1.41371	1.56317	1.36237	1.31083
753.125	2.66036	1.9473	1.90692	1.92117	3.91975	1.44623	2.13531	5.16748	1.93921	1.23525	1.29763	1.1255	1.0994	1.04378	1.0003	1.03027	1.31846	1.38058	1.16955	1.08226	1.03572	1.51044		678.668	1.15886	1.73185	1.21568	1.31877	1.91663	1.27605	2.45681	1.32829	1.52248	1.58501	1.19532	1.40972	1.56219	1.41641	1.34529
753.75	2.27551	1.76912	2.03219	1.92984	3.87481	1.47982	1.94465	5.00869	2.10532	1.23997	1.2902	1.12426	1.11858	1.04282	1.00269	1.027	1.32269	1.32188	1.1735	1.06914	1.05175	1.49673		679.231	1.16694	1.71316	1.23065	1.31521	1.84143	1.33728	2.37054	1.32947	1.56136	1.58318	1.17802	1.40601	1.57091	1.38992	1.32457
754.375	2.16934	1.65783	2.22482	1.95386	3.8574	1.52446	1.8581	4.96479	2.14645	1.22101	1.27464	1.13097	1.14344	1.04296	1.01141	1.03083	1.37529	1.30011	1.1777	1.06432	1.05928	1.53353		679.794	1.10176	1.76334	1.23494	1.29672	1.74587	1.43476	2.33652	1.32837	1.61911	1.59342	1.19923	1.4116	1.56262	1.40264	1.28555
755	2.39069	1.59219	2.29576	1.94472	3.9824	1.51739	1.8588	5.07352	2.13896	1.17318	1.22002	1.14166	1.14853	1.04912	1.00705	1.04944	1.41682	1.30867	1.19187	1.0801	1.06692	1.51845		680.358	1.12857	1.6759	1.19538	1.31191	1.78356	1.53616	2.35542	1.34838	1.67757	1.6117	1.2171	1.41688	1.55494	1.41403	1.28597
755.625	2.65192	1.55773	2.29938	1.85811	3.77414	1.49269	2.02876	5.1466	2.07553	1.13353	1.20241	1.14857	1.12154	1.03659	1.00192	1.05817	1.42316	1.35161	1.20988	1.11434	1.07177	1.53279		680.921	1.16257	1.64209	1.17592	1.30714	2.03297	1.61892	2.32955	1.35722	1.74244	1.65045	1.20955	1.40833	1.55779	1.36973	1.3065
756.25	2.83916	1.551	2.32439	1.74945	3.5532	1.50271	2.2376	5.09461	1.90262	1.10817	1.22591	1.14393	1.08714	1.03769	0.995809	1.06122	1.35859	1.41726	1.20033	1.1157	1.06024	1.51218		681.484	1.16419	1.55826	1.1806	1.27721	2.27419	1.66727	2.41333	1.34825	1.76553	1.65166	1.21644	1.39943	1.55298	1.37081	1.33297
756.875	2.97285	1.52674	2.37838	1.73923	3.50908	1.53795	2.30923	4.80479	1.70746	1.10759	1.20724	1.14973	1.05721	1.03293	0.985527	1.04069	1.32674	1.43428	1.18921	1.11183	1.04803	1.53733		682.047	1.14253	1.52243	1.2064	1.28688	2.28833	1.71158	2.4579	1.33825	1.60337	1.64236	1.21962	1.43184	1.54749	1.36315	1.32999
757.5	2.63561	1.50501	2.48348	1.76455	3.45957	1.54583	2.22717	4.37666	1.59019	1.1398	1.19786	1.16961	1.04926	1.03134	0.980075	1.01848	1.34169	1.39566	1.19659	1.10105	1.03636	1.54		682.61	1.10428	1.51374	1.27428	1.30095	1.9723	1.75458	2.40685	1.35068	1.51598	1.63239	1.20928	1.449	1.54919	1.35274	1.31727
758.125	2.44103	1.4989	2.67123	1.70521	3.28663	1.56944	2.26361	3.90564	1.57123	1.17277	1.20361	1.15765	1.06985	1.03271	0.978129	1.00616	1.36905	1.38174	1.20096	1.11473	1.05679	1.48303		683.174	1.0809	1.53167	1.37363	1.30635	1.71224	1.71027	2.43958	1.35059	1.44675	1.57913	1.2074	1.45297	1.5659	1.40882	1.31931
758.75	2.32994	1.48763	2.79139	1.73052	3.26812	1.66848	2.46625	3.78316	1.61523	1.15857	1.19125	1.15206	1.05521	1.04022	0.981344	1.02968	1.37141	1.38863	1.18633	1.07714	1.06301	1.45518		683.737	1.06175	1.60032	1.39726	1.3101	1.60751	1.65513	2.47947	1.35785	1.45839	1.56134	1.20701	1.4628	1.58356	1.42949	1.33376
759.375	2.32034	1.50373	2.74145	1.81485	3.32815	1.6969	2.47148	3.79411	1.64093	1.13087	1.19484	1.15573	1.03366	1.04535	0.980517	1.03681	1.33643	1.37709	1.17628	1.09629	1.08729	1.46996		684.3	1.04058	1.60541	1.42879	1.31066	1.66944	1.62046	2.51877	1.37016	1.48596	1.57906	1.20498	1.45712	1.5912	1.45858	1.33241
760	2.29053	1.49156	2.64694	1.79453	3.26905	1.67878	2.35299	3.66486	1.62098	1.12496	1.24637	1.15378	1.02569	1.04398	0.993295	1.03403	1.32231	1.36533	1.17574	1.12497	1.07133	1.50898		684.863	1.01563	1.62808	1.46767	1.29963	1.76994	1.60429	2.48878	1.36485	1.43756	1.56435	1.19739	1.44396	1.58602	1.47682	1.34332
760.625	2.26096	1.4892	2.4116	1.68729	3.12263	1.70808	2.15382	3.65829	1.59201	1.12811	1.36186	1.15649	1.02059	1.05726	0.991262	1.02341	1.32911	1.36014	1.16689	1.08673	1.06229	1.52752		685.427	0.979243	1.60991	1.44195	1.29367	1.70197	1.56953	2.49925	1.36276	1.42471	1.61746	1.16963	1.47228	1.57911	1.43678	1.32194
761.25	2.47804	1.49132	2.18905	1.6328	3.12652	1.7084	2.1186	3.70094	1.55865	1.14517	1.63579	1.13828	1.03095	1.05227	0.985848	1.00656	1.35196	1.34115	1.18159	1.08766	1.06164	1.54826		685.99	0.958627	1.57779	1.39731	1.27279	1.73992	1.49873	2.51544	1.3348	1.37291	1.63114	1.16598	1.47329	1.57284	1.4351	1.31423
761.875	2.85426	1.52441	2.1462	1.61398	3.27341	1.66153	2.05985	3.74103	1.52624	1.16499	2.06926	1.12008	1.04448	1.06074	0.978123	1.0102	1.36351	1.30103	1.18855	1.13655	1.05818	1.53648		686.553	0.967722	1.59417	1.33293	1.28161	1.81468	1.44183	2.52852	1.32867	1.35681	1.62166	1.18212	1.44645	1.57276	1.43493	1.29586
762.5	3.03233	1.54308	2.35261	1.6062	3.43429	1.62259	2.04747	3.74189	1.51591	1.16636	2.27217	1.11587	1.05709	1.08315	0.96374	1.01742	1.40178	1.26226	1.18564	1.16855	1.06076	1.55052		687.116	0.986907	1.61051	1.31174	1.2712	1.87784	1.40713	2.54785	1.35645	1.35523	1.60967	1.18441	1.43805	1.58227	1.46532	1.31512
763.125	2.91806	1.53202	2.59878	1.60469	3.35103	1.5233	2.18681	3.61595	1.50849	1.17336	1.95097	1.10615	1.0567	1.10897	0.963974	1.01209	1.42927	1.24732	1.17415	1.11879	1.07035	1.59908		687.679	0.97614	1.64378	1.28544	1.26724	1.88404	1.34616	2.68266	1.33544	1.38552	1.59207	1.18497	1.45731	1.57197	1.42553	1.30529
763.75	2.66724	1.51636	2.49235	1.61335	3.11262	1.54268	2.37512	3.44579	1.49829	1.18926	1.58407	1.12382	1.06033	1.09057	0.984175	1.00725	1.39806	1.24324	1.17467	1.11269	1.0707	1.56767		688.243	0.969383	1.73934	1.30914	1.29468	1.94076	1.328	2.8719	1.31595	1.36693	1.58026	1.19701	1.46347	1.56142	1.36772	1.34205
764.375	2.46991	1.49817	2.23103	1.58611	2.92326	1.59041	2.28603	3.3455	1.50792	1.1922	1.37165	1.11753	1.08395	1.08459	1.01048	1.01891	1.38855	1.23339	1.18216	1.08866	1.06902	1.55107		688.806	1.00876	1.92438	1.31007	1.26975	1.99205	1.3476	3.00998	1.32674	1.43347	1.56448	1.19784	1.4594	1.57165	1.32165	1.34906
765	2.60307	1.46442	2.14661	1.57692	2.79989	1.57343	2.15971	3.3885	1.50072	1.16094	1.27777	1.10347	1.1131	1.08531	1.01804	1.02735	1.41433	1.2378	1.18808	1.12084	1.03844	1.5448		689.369	1.00342	1.97339	1.3208	1.27567	1.97405	1.35544	2.85346	1.3509	1.4816	1.54358	1.19705	1.43512	1.56997	1.35511	1.34135
765.625	2.6216	1.43072	2.21002	1.64278	2.73806	1.58897	2.10476	3.51683	1.51615	1.13052	1.208	1.11705	1.11497	1.04384	1.00439	1.00082	1.4789	1.27712	1.18232	1.11142	1.0334	1.54045		689.932	0.971907	1.93099	1.32542	1.31646	1.90555	1.37624	2.76986	1.33925	1.46497	1.53007	1.19642	1.42873	1.57056	1.34944	1.34172
766.25	2.42425	1.43857	2.24767	1.70201	2.80969	1.55866	2.13599	3.64897	1.56192	1.11798	1.15914	1.10659	1.11301	1.01509	1.00882	1.01483	1.48713	1.35153	1.179	1.11034	1.06415	1.5483		690.495	0.966507	1.83294	1.32285	1.38197	1.77335	1.37103	2.72918	1.33489	1.46945	1.53855	1.18609	1.4506	1.5594	1.36446	1.36602
766.875	2.28958	1.44783	2.2491	1.69865	2.94167	1.54317	2.11535	3.7176	1.60185	1.12206	1.15344	1.0945	1.13613	1.0184	1.02307	1.02034	1.49696	1.39538	1.18299	1.09716	1.04597	1.52772		691.059	0.97469	1.80871	1.29926	1.4324	1.75697	1.33099	2.80947	1.31909	1.47971	1.54983	1.18826	1.46338	1.53886	1.36522	1.35808
767.5	2.43444	1.44029	2.27817	1.67198	2.76812	1.59732	1.99953	3.79545	1.61202	1.12528	1.16651	1.10663	1.13944	1.01472	1.02501	1.02416	1.46634	1.3593	1.19371	1.09806	1.04091	1.51472		691.622	0.99994	1.73274	1.31215	1.37343	1.79466	1.34604	2.78517	1.33583	1.48567	1.5386	1.16682	1.44386	1.52657	1.34208	1.36839
768.125	2.53847	1.4701	2.30554	1.69436	2.41202	1.58037	1.93068	3.75316	1.59842	1.13524	1.16491	1.13331	1.12901	1.02722	1.01442	1.02456	1.38698	1.31361	1.20019	1.11314	1.07503	1.49871		692.185	1.02035	1.80149	1.33769	1.37977	1.84572	1.36182	2.87291	1.34268	1.40838	1.56633	1.17976	1.43948	1.52283	1.33296	1.33802
768.75	2.36263	1.50549	2.23646	1.64836	2.24435	1.58748	1.88122	3.51824	1.59136	1.15616	1.14939	1.14657	1.12961	1.01851	1.0062	1.0263	1.33706	1.30369	1.2028	1.13182	1.05986	1.47254		692.748	1.04442	1.83913	1.35621	1.42296	1.91545	1.39007	2.99023	1.33596	1.34232	1.56881	1.21392	1.41872	1.53299	1.36101	1.31974
769.375	2.10389	1.51848	2.11612	1.64769	2.16752	1.5882	1.86386	3.47833	1.59204	1.1786	1.13512	1.13033	1.10475	1.02046	1.00987	1.02642	1.32491	1.29878	1.20825	1.1152	1.06524	1.44436		693.311	1.0392	1.77514	1.33722	1.46379	1.92119	1.42806	3.08506	1.35138	1.2948	1.56269	1.20943	1.41092	1.55347	1.40694	1.3104
770	2.10163	1.49226	2.01822	1.67899	2.19628	1.55658	1.88668	3.56734	1.58909	1.19327	1.13074	1.11203	1.07366	1.01156	0.990384	1.01105	1.34192	1.2898	1.20621	1.1602	1.04012	1.47944		693.875	1.0139	1.76199	1.34418	1.43644	1.88236	1.40088	3.07878	1.35222	1.28351	1.58282	1.2484	1.40074	1.57524	1.39229	1.33078
770.625	2.29176	1.483	1.98172	1.75262	2.40143	1.52841	1.88998	3.55705	1.57174	1.18586	1.13911	1.10891	1.06284	1.01159	0.984989	1.00926	1.35383	1.28798	1.20049	1.14153	1.026	1.50973		694.438	1.01921	1.748	1.3622	1.44732	1.85187	1.4017	3.20594	1.36651	1.31468	1.54155	1.23784	1.407	1.56298	1.39051	1.34727
771.25	2.91112	1.44171	1.92464	1.76066	2.56142	1.4907	1.90955	3.50529	1.55394	1.17176	1.1293	1.10509	1.07487	1.02251	0.979177	1.02438	1.35365	1.30012	1.20621	1.08539	1.0351	1.47763		695.001	1.02728	1.70744	1.34558	1.48943	1.89356	1.39724	3.56929	1.36701	1.38652	1.51751	1.22672	1.38839	1.55477	1.3434	1.32623
771.875	3.18769	1.36323	1.90395	1.66939	2.5252	1.46855	1.98806	3.60119	1.54403	1.17389	1.1211	1.10516	1.10472	1.01921	0.979961	1.03478	1.37802	1.33465	1.21368	1.0872	1.04055	1.45557		695.564	1.05216	1.71375	1.31826	1.54028	1.89359	1.40636	4.15617	1.36069	1.37489	1.52781	1.19554	1.39048	1.55488	1.35223	1.33323
772.5	3.00493	1.35468	1.93908	1.59773	2.37456	1.4706	2.05411	3.71356	1.54444	1.176	1.14095	1.10157	1.12538	1.02119	0.983896	1.03042	1.32625	1.36355	1.22794	1.11799	1.05134	1.51001		696.128	1.01539	1.68993	1.30655	1.54932	1.88281	1.40424	4.2219	1.35509	1.29459	1.53554	1.18742	1.40816	1.55885	1.37389	1.36423
773.125	2.72408	1.40296	1.95523	1.55427	2.29582	1.52077	1.99817	3.8041	1.55807	1.17747	1.15191	1.10912	1.1511	1.03454	0.978875	1.03076	1.29926	1.35577	1.21659	1.11985	1.04793	1.56915		696.691	1.05262	1.67302	1.30542	1.41237	1.85284	1.41258	3.91565	1.35645	1.30646	1.55009	1.17663	1.41847	1.55245	1.38072	1.37363
773.75	2.71243	1.39706	1.89251	1.54535	2.33084	1.60224	1.94612	3.87816	1.55736	1.17284	1.15868	1.10641	1.16614	1.0176	0.982608	1.03596	1.28212	1.29994	1.21981	1.11972	1.06772	1.59516		697.254	1.07162	1.65405	1.31963	1.34735	1.7414	1.45744	3.77843	1.36033	1.28265	1.56445	1.18897	1.39991	1.54565	1.39063	1.35338
774.375	2.73151	1.38845	1.849	1.5538	2.38552	1.6687	2.00054	4.10127	1.51484	1.15487	1.17832	1.09136	1.17722	1.00253	0.99984	1.04082	1.32417	1.25575	1.23753	1.09787	1.05959	1.57067		697.817	1.1079	1.63436	1.31836	1.33422	1.69868	1.51792	3.75049	1.36444	1.23852	1.57249	1.21857	1.39859	1.55681	1.36304	1.33749
775	2.69368	1.37164	1.81973	1.58567	2.31258	1.68893	2.09142	4.08793	1.45479	1.13578	1.1894	1.08093	1.17541	1.00042	1.01429	1.02783	1.32107	1.24413	1.24212	1.10792	1.05435	1.55936		698.38	1.15066	1.56385	1.31068	1.32659	1.71769	1.62909	3.74618	1.35365	1.18488	1.58495	1.21546	1.39693	1.54244	1.33495	1.33604
775.625	2.67081	1.32889	1.77584	1.64534	2.23362	1.64177	2.14713	3.8514	1.42291	1.13488	1.20673	1.09841	1.1437	0.991986	1.01084	1.01928	1.2856	1.215	1.23467	1.14416	1.07675	1.54898		698.944	1.19825	1.50414	1.31528	1.31998	1.74067	1.80493	3.85875	1.34682	1.19232	1.57741	1.24306	1.39502	1.53103	1.36155	1.33157
776.25	2.45604	1.3067	1.68389	1.65025	2.20831	1.62024	2.28586	3.69791	1.42104	1.13755	1.19505	1.12022	1.09779	0.99665	1.01084	1.01636	1.25498	1.20425	1.21916	1.14343	1.08361	1.58036		699.507	1.18072	1.46251	1.29278	1.30018	1.75952	2.02918	4.08464	1.35022	1.18644	1.59279	1.22573	1.41256	1.5152	1.36273	1.35758
776.875	2.44911	1.30664	1.62192	1.69056	2.12552	1.62143	2.64809	3.5848	1.41326	1.12926	1.14478	1.11025	1.08082	1.00024	1.02213	1.02413	1.21834	1.24624	1.20239	1.1821	1.08666	1.57733		700.07	1.09947	1.50545	1.28348	1.31164	1.76641	2.24616	4.22852	1.34336	1.19855	1.57317	1.20894	1.40324	1.50224	1.34354	1.35639
777.5	2.43723	1.31781	1.57602	1.61202	2.15254	1.62366	3.02854	3.50661	1.41193	1.12062	1.11754	1.10826	1.05796	1.01211	1.00425	1.03565	1.2297	1.29095	1.18345	1.15581	1.08661	1.51916		700.633	1.05518	1.51687	1.28108	1.3205	1.79116	2.3874	4.32192	1.32556	1.2069	1.56437	1.20984	1.40426	1.50458	1.36467	1.33567
778.125	2.41503	1.31175	1.5049	1.57427	2.1607	1.60979	2.98303	3.43511	1.41154	1.12441	1.09496	1.08977	1.04338	1.01834	0.985241	1.04011	1.24572	1.30812	1.17255	1.10498	1.05048	1.46158		701.196	1.00298	1.50689	1.26014	1.32924	1.74737	2.56718	4.21218	1.30394	1.20933	1.55257	1.19863	1.41769	1.50975	1.36916	1.34702
778.75	2.52313	1.29574	1.48145	1.56542	2.14935	1.55004	2.77801	3.51085	1.42738	1.11597	1.08911	1.05647	1.03518	1.01441	0.983512	1.03674	1.26976	1.30375	1.17449	1.1176	1.02754	1.44875		701.76	1.01669	1.53689	1.24612	1.28346	1.80302	2.55913	4.0687	1.3016	1.19884	1.53883	1.20775	1.41978	1.52794	1.36591	1.3557
779.375	2.63181	1.28884	1.48766	1.57565	2.25497	1.53742	2.54932	3.63783	1.45411	1.09625	1.09405	1.05533	1.03249	1.01145	0.99087	1.02149	1.29551	1.29376	1.17418	1.12226	1.00753	1.44933		702.323	1.03865	1.60557	1.27245	1.30137	1.77625	2.49713	4.00411	1.30837	1.21346	1.53394	1.20387	1.43106	1.54107	1.35898	1.35429
780	2.86798	1.29506	1.49983	1.52877	2.3286	1.60995	2.43413	3.56474	1.45336	1.0957	1.09734	1.09108	1.05438	1.01339	1.00363	1.02595	1.3137	1.31444	1.17086	1.14581	1.02662	1.44401		702.886	1.03382	1.60034	1.31764	1.28976	1.71395	2.43035	3.88706	1.30589	1.19565	1.57193	1.2064	1.42889	1.54848	1.3509	1.35542
780.625	3.01703	1.30688	1.53951	1.53357	2.35549	1.66027	2.54867	3.40399	1.4257	1.10136	1.10704	1.09325	1.07171	1.00929	1.01625	1.02645	1.37202	1.35538	1.16315	1.12812	1.04438	1.45425		703.449	1.01629	1.52865	1.3338	1.31319	1.77497	2.30327	3.67539	1.30369	1.23935	1.54983	1.21998	1.4178	1.52847	1.34611	1.36979
781.25	3.12684	1.35617	1.64535	1.56291	2.3419	1.62625	2.78211	3.24004	1.41031	1.1032	1.1117	1.08488	1.07755	1.02821	0.999013	1.00258	1.40824	1.37938	1.15867	1.10369	1.04193	1.45569		704.012	0.965818	1.55693	1.33103	1.35246	1.76684	2.21903	3.61427	1.29608	1.2318	1.54753	1.21157	1.41753	1.51711	1.35029	1.32552
781.875	2.76571	1.4506	1.76129	1.61197	2.41312	1.57496	2.76026	3.05935	1.40684	1.09677	1.13304	1.0878	1.09348	1.04733	0.985266	1.00171	1.37948	1.35641	1.16871	1.10336	1.04931	1.47765		704.576	0.968125	1.53182	1.31217	1.37816	1.79946	2.26066	3.57566	1.29499	1.22627	1.53349	1.19407	1.42295	1.51595	1.36883	1.33458
782.5	2.51458	1.54302	1.76287	1.61544	2.81917	1.55573	2.43455	2.93432	1.38461	1.09655	1.12734	1.09184	1.10659	1.0316	0.974282	1.00974	1.36818	1.34858	1.16457	1.10822	1.06257	1.52271		705.139	0.969742	1.54134	1.33583	1.39142	1.88565	2.33178	3.41336	1.29969	1.22875	1.54107	1.17779	1.46816	1.50984	1.40252	1.3682
783.125	2.39726	1.54545	1.64854	1.60709	3.5734	1.52576	2.13997	2.89054	1.36157	1.10349	1.12064	1.1061	1.12171	1.01823	0.973556	1.00421	1.3602	1.36659	1.1639	1.08561	1.07019	1.51953		705.702	0.980274	1.57684	1.35418	1.37902	1.89075	2.47244	3.2883	1.30989	1.21967	1.55029	1.16438	1.49544	1.52887	1.41603	1.33101
783.75	2.13712	1.53575	1.52845	1.62323	3.58816	1.5204	1.93507	2.9386	1.3547	1.09876	1.12758	1.11901	1.12837	1.01899	0.977852	0.998848	1.34156	1.35718	1.17321	1.10577	1.05479	1.49998		706.265	0.972763	1.5792	1.3815	1.39763	1.9609	2.63832	3.28994	1.33785	1.20982	1.56483	1.16678	1.48144	1.55026	1.36858	1.347
784.375	1.98995	1.51995	1.46541	1.58694	3.38762	1.49421	1.9281	3.00695	1.3472	1.09326	1.13623	1.1045	1.1627	1.0103	0.961776	1.00551	1.32117	1.33059	1.17934	1.11249	1.04485	1.46		706.828	0.971423	1.58846	1.36783	1.39976	2.08683	2.71439	3.32205	1.3328	1.24813	1.54918	1.15878	1.42459	1.55215	1.34361	1.33149
785	2.02354	1.47001	1.44066	1.5643	3.66546	1.48401	1.94065	3.07815	1.33926	1.10231	1.13449	1.10289	1.21505	1.01094	0.958224	1.01889	1.30787	1.32313	1.18536	1.09342	1.05775	1.44718		707.392	0.962622	1.61351	1.35639	1.36849	2.17256	2.66239	3.30394	1.3344	1.26532	1.54644	1.16998	1.37419	1.5423	1.34228	1.34222
785.625	2.03896	1.43264	1.45136	1.54518	3.43644	1.49496	1.97473	3.13466	1.34496	1.1108	1.1376	1.08557	1.21202	1.0272	0.970347	1.0146	1.27658	1.32892	1.20899	1.09145	1.10282	1.47243		707.955	0.98625	1.6064	1.3315	1.30912	2.2329	2.66303	3.22068	1.33262	1.29916	1.54223	1.18163	1.36204	1.53826	1.3384	1.37648
786.25	1.98537	1.39763	1.48682	1.50656	3.1961	1.45859	1.98041	3.09209	1.36079	1.1071	1.13754	1.07261	1.19175	1.00377	0.974604	1.00534	1.27291	1.3117	1.21779	1.09257	1.06471	1.53297		708.518	0.980396	1.6212	1.27924	1.25642	2.25999	2.73216	3.20735	1.33953	1.29334	1.56852	1.21554	1.3542	1.5468	1.36553	1.37799
786.875	2.04882	1.37507	1.51281	1.46913	3.2232	1.41928	2.0978	3.04237	1.35144	1.09683	1.12442	1.06506	1.1665	0.996614	0.971484	1.00426	1.27	1.27712	1.21104	1.14897	1.04696	1.55461		709.081	0.988669	1.62722	1.27785	1.26176	2.28875	2.86792	3.21883	1.35652	1.32365	1.57206	1.20809	1.37856	1.542	1.34538	1.35215
787.5	2.09615	1.35485	1.4754	1.47106	3.18817	1.39248	2.37078	3.00956	1.34157	1.09612	1.10034	1.04426	1.16622	0.992863	0.986195	1.01248	1.25148	1.25054	1.20143	1.18643	1.04591	1.53151		709.645	0.979141	1.63563	1.28577	1.22691	2.39455	2.85299	3.25226	1.36337	1.31259	1.58586	1.21966	1.37507	1.54215	1.3507	1.36604
788.125	2.10691	1.34491	1.44873	1.45623	3.10741	1.35855	2.94779	3.02665	1.35124	1.08782	1.10047	1.05735	1.15345	1.00695	1.01079	1.04002	1.24895	1.24751	1.18935	1.1984	1.03192	1.52737		710.208	0.995614	1.685	1.30321	1.22326	2.47751	2.68079	3.28264	1.37407	1.29314	1.58411	1.23499	1.38049	1.55941	1.34722	1.35171
788.75	2.14973	1.34819	1.44408	1.46408	3.07383	1.35858	3.72645	2.97852	1.37723	1.07661	1.09378	1.06098	1.12144	1.01689	1.00768	1.03579	1.24998	1.25968	1.19345	1.12489	1.032	1.55529		710.771	1.00159	1.71418	1.29722	1.24288	2.49204	2.5641	3.34139	1.36137	1.3014	1.55249	1.23273	1.36787	1.57243	1.34952	1.34961
789.375	2.19384	1.38064	1.48119	1.47951	2.93273	1.37405	3.92534	2.90811	1.39906	1.0734	1.08485	1.06039	1.10269	1.01748	0.994274	1.0322	1.27952	1.27422	1.19123	1.10045	1.04134	1.56615		711.334	1.0113	1.75765	1.32299	1.23197	2.42965	2.46064	3.43668	1.35871	1.27736	1.55796	1.21768	1.36238	1.56794	1.34221	1.34522
790	2.32594	1.41833	1.50894	1.47771	2.81088	1.39624	3.37786	2.91911	1.39402	1.08375	1.09372	1.06923	1.11201	1.00576	1.00651	1.02507	1.29306	1.29204	1.18098	1.08301	1.04706	1.63201		711.897	1.02396	1.82718	1.29636	1.23371	2.34337	2.31694	3.43571	1.34057	1.26912	1.56701	1.20262	1.38231	1.56298	1.32603	1.36581
790.625	2.20316	1.44499	1.50218	1.46641	2.81706	1.39971	2.78673	3.0163	1.3846	1.10805	1.0996	1.08547	1.12089	1.0019	1.0135	1.00867	1.27758	1.30292	1.1755	1.10948	1.04998	1.73984		712.461	1.01002	1.79604	1.31098	1.2653	2.31745	2.22569	3.51965	1.33237	1.25954	1.58451	1.19414	1.38367	1.55989	1.36736	1.33891
791.25	2.04729	1.46924	1.49192	1.45538	2.91085	1.43353	2.66896	2.99905	1.38818	1.14113	1.10002	1.0822	1.13346	1.0084	0.990693	1.00639	1.25491	1.29167	1.17845	1.1245	1.05333	1.74058		713.024	1.01853	1.77845	1.2905	1.28642	2.29274	2.27732	3.58901	1.33215	1.25799	1.55727	1.19401	1.37227	1.55114	1.37395	1.29883
791.875	2.00472	1.52726	1.4809	1.48688	2.96166	1.43332	2.57009	3.02095	1.398	1.15759	1.08273	1.08992	1.11528	1.03138	0.984762	1.01928	1.25963	1.27786	1.18568	1.12059	1.03984	1.72802		713.587	1.02362	1.64839	1.25218	1.28081	2.20725	2.37016	3.58317	1.33803	1.25748	1.54094	1.20353	1.37583	1.54051	1.33632	1.3269
792.5	2.04699	1.57246	1.47107	1.53148	3.17411	1.43895	2.47053	3.11719	1.39128	1.15238	1.08049	1.0974	1.10759	1.04226	0.976032	1.00795	1.28276	1.27078	1.19741	1.12352	1.02293	1.6925		714.15	0.957947	1.61155	1.25897	1.24825	2.07546	2.45665	3.65594	1.32016	1.25337	1.54906	1.19465	1.37971	1.53178	1.35764	1.34354
793.125	1.9772	1.57948	1.48016	1.51244	2.97417	1.44005	2.32575	3.21544	1.40988	1.14414	1.08279	1.10015	1.09633	1.02389	0.964074	0.990447	1.36468	1.26799	1.20935	1.09474	1.00713	1.63156		714.713	0.940275	1.58965	1.26374	1.26005	1.991	2.41791	3.74553	1.32041	1.25618	1.54104	1.20149	1.38408	1.53383	1.3471	1.29036
793.75	1.8808	1.59773	1.50784	1.44753	2.90731	1.41011	2.4011	3.41929	1.43342	1.13606	1.08093	1.10299	1.09305	1.02815	0.973321	0.980179	1.38277	1.28749	1.21403	1.08736	1.07362	1.61939		715.277	0.938947	1.61757	1.27627	1.26105	1.90829	2.20373	3.45174	1.32363	1.24654	1.56185	1.21187	1.38039	1.54627	1.32643	1.28042
794.375	1.77956	1.62038	1.52995	1.48047	3.12274	1.43066	2.71084	3.56596	1.44321	1.12682	1.0893	1.07574	1.09106	1.04594	0.971611	0.989921	1.3084	1.34844	1.2043	1.08242	1.07923	1.62678		715.84	0.923224	1.61456	1.27937	1.24454	1.91124	2.10869	3.34322	1.32706	1.28952	1.55804	1.22224	1.3844	1.55784	1.33883	1.30628
795	1.61498	1.62919	1.52447	1.53134	2.95425	1.49942	3.25158	3.22856	1.43864	1.12352	1.08881	1.07399	1.08551	1.06695	0.973101	1.01167	1.29399	1.36337	1.19984	1.07613	1.02518	1.62686		716.403	0.902949	1.6625	1.25386	1.23451	1.96966	2.04738	3.25205	1.32881	1.31904	1.56712	1.22428	1.37991	1.55991	1.34966	1.31639
795.625	1.5609	1.60222	1.49284	1.4886	2.87379	1.51117	3.43586	3.11459	1.41686	1.13306	1.1022	1.06126	1.08165	1.07168	0.974927	1.03608	1.31136	1.30399	1.20374	1.08378	1.01235	1.60434		716.966	0.899639	1.61661	1.24301	1.25159	1.95622	2.06049	3.20051	1.33664	1.30331	1.56394	1.19387	1.38863	1.54556	1.3706	1.33157
796.25	1.55221	1.53389	1.44911	1.47135	2.7844	1.48626	3.30942	3.17582	1.3832	1.14797	1.09753	1.07289	1.08284	1.08064	0.979867	1.03809	1.30565	1.26319	1.20661	1.09553	1.02884	1.59052		717.529	0.903688	1.59961	1.26038	1.22824	1.96384	2.14887	3.24845	1.34291	1.322	1.59355	1.19819	1.39709	1.55115	1.33764	1.37035
796.875	1.5827	1.46022	1.42753	1.48247	3.03145	1.41742	2.96101	3.22125	1.37571	1.16168	1.08688	1.05714	1.08868	1.10045	0.981414	1.02673	1.28941	1.24612	1.20143	1.10692	1.03241	1.56409		718.093	0.923162	1.63154	1.2735	1.24108	1.99344	2.33561	3.21944	1.33719	1.30249	1.5591	1.17087	1.40764	1.56187	1.32047	1.38545
797.5	1.55485	1.42513	1.4351	1.4432	3.21283	1.3614	2.76754	3.24176	1.36182	1.16586	1.08836	1.0671	1.10716	1.12698	0.966778	0.999643	1.27803	1.22559	1.20341	1.12889	1.03225	1.54965		718.656	0.948189	1.65767	1.25901	1.22478	2.00562	2.47216	3.08155	1.3494	1.27796	1.55891	1.22017	1.41981	1.57819	1.32301	1.40214
798.125	1.52616	1.41583	1.44869	1.46558	3.14927	1.30012	2.70354	3.37404	1.3357	1.16547	1.0947	1.0917	1.11447	1.12616	0.963386	0.999878	1.28196	1.2046	1.20871	1.10591	1.02141	1.55823		719.219	0.928149	1.65166	1.23474	1.22664	1.99078	2.55437	2.98077	1.35324	1.27934	1.59708	1.21032	1.41904	1.57406	1.34259	1.37076
798.75	1.50672	1.44069	1.4299	1.49857	3.0902	1.32183	2.61818	3.51499	1.33637	1.14588	1.09486	1.10244	1.11103	1.05836	0.954112	1.00129	1.29723	1.21724	1.20576	1.10179	1.02201	1.56822		719.782	0.933073	1.62589	1.23726	1.22049	2.03529	2.66064	2.91042	1.35649	1.27493	1.59408	1.19659	1.42775	1.56168	1.33162	1.35466
[truncated: 320 more rows]
