# Supplementary material for: DCC regulates astroglial development essential for telencephalic morphogenesis and corpus callosum formation
Source: eLife. 2021 Apr 19;10:e61769. doi: 10.7554/eLife.61769 (PMC8116049; doi:10.7554/eLife.61769)
Supplement: Figure 6—figure supplement 1—source data 1. [file elife-61769-fig6-figsupp1-data1.xlsx]

## Sheet: Figure 6-S6C
Figure S6C: Quantification of the ratio of DCC expression between ipsilateral (electroporated; EP) and contralateral (non-EP) hemispheres
Myr-TDTOMATODcckanga/wt	DCC-CRISPR Dcckanga/wt	DCC-shRNA Dcckanga/wt	DCC-CRISPR Dccwt/wt	myr-TDTOMATO Dccwt/wt
0.992797	0.992028	0.931295	1.00406	1.04994
1.02714	0.992498	0.980563	0.99776	0.999783
0.97765	0.945637	0.913976	1.00261	0.97735
1.01035	1.04784	0.896401		0.980605
0.940167	0.948498			1.0073
0.97332	0.969588
1.02099	0.990711
1.01848	0.973717
0.989232	1.01046

## Sheet: Figure 6-S6D
Figure S6D: Quantification of the ratio of IHF length and association with CC length in ventral sections of Dcc cKO mice.
Ratio IHF length	CC size control	CC length cre-pos
0.504339	0.0822037
0.48177	0.0506218
0.483418	0.127364
0.497859	0.0800277
0.532566	0.0941297
0.469135	0.0978626
0.871875		0
0.616493		0
0.634626		0
0.504436		0
0.526731		0.109109
0.594551		0
0.546167		0.086389
0.635957		0
0.715986		0
0.554369		0.0660374
0.699165		0
0.725548		0

## Sheet: Figure 6-S6G
Figure S6G: Quantification of the ratio of IHF length and association with HC length in dorsal sections of Dcc cKO mice.
Ratio IHF length	HC size control	HC length cre-pos
0.569975	0.132225
0.550533	0.118765
0.595582	0.141333
0.534601	0.135029
0.579162	0.151432
0.626944	0.142192
0.670931	0.142588
1		0
1		0
1		0
0.633681		0.141448
0.624467		0.160483
0.671715		0.148884
0.696857		0.138277
1		0
0.675488		0.188876
0.660087		0.215991
0.640553		0.140336
0.636357		0.123846

## Sheet: Figure 6-S6E
Figure S6E: Quantification of the ratio of IHF length and association with HC length in ventral sections of Dcc cKO mice.
Ratio IHF length	HC size control	HC length cre-pos
0.504339	0.184169
0.48177	0.226447
0.483418	0.165165
0.497859	0.220171
0.532566	0.247197
0.469135	0.239787
0.871875		0.0347484
0.616493		0.0868616
0.634626		0.0757025
0.504436		0.22373
0.526731		0.185744
0.594551		0.10534
0.546167		0.194675
0.635957		0.0228045
0.715986		0.157695
0.554369		0.120335
0.699165		0
0.725548		0.0467402

## Sheet: Figure 6-S6F
Figure S6F Quantification of the ratio of IHF length and association with CC length in dorsal sections of Dcc cKO mice.
Ratio IHF length	CC size control	CC length cre-pos
0.569975	0.162783
0.550533	0.193179
0.595582	0.168151
0.534601	0.183818
0.579162	0.180826
0.626944	0.142393
0.670931	0.138969
1		0
1		0
1		0
0.633681		0.176543
0.624467		0.169923
0.671715		0.14003
0.696857		0.147057
1		0
0.675488		0.119711
0.660087		0.112364
0.640553		0.165001
0.636357		0.213506

## Sheet: Figure 6-S6I
Figure S6E: Quantification of the mean GLAST fluorscence intensity along the IHF surface in E15 Dcc cKO mice
Distance (microns)	Cre-negative Dcc cKO n1	Cre-negative Dcc cKO n2	Cre-negative Dcc cKO n3	Cre-negative Dcc cKO n4	Cre-negative Dcc cKO n5	Cre-positive Dcc cKO n1	Cre-positive Dcc cKO n2	Cre-positive Dcc cKO n3	Cre-positive Dcc cKO n4	Cre-positive Dcc cKO n5	Cre-positive Dcc cKO n6
0	750.982	587.427	672.409	610.444	543.105	508.199	510.439	518.076	810.48	633.532	715.135
0.585	741.38	600.784	672.83	608.637	547.409	507.111	512.632	515.281	807.281	632.708	730.918
1.17	740.14	587.842	670.497	615.094	561.602	505.398	516.462	517.018	815.62	626.83	748.784
1.755	739.368	562.585	669.924	619.52	569.819	508.351	519.058	520.193	845.55	618.292	777.135
2.34	744.848	556.813	671.234	616.789	565.246	513.982	525.211	523.585	858.281	605.444	780.439
2.924	756.632	540.257	661.567	613.813	559.509	520.281	520.813	525.626	847.047	608.363	777.099
3.509	759.24	530.374	649.053	622.895	559.491	515.842	517.491	525.053	854.257	628.825	784.164
4.094	756.977	533.509	644	621.526	556.585	500.754	517.579	525.526	855.556	634.515	784.123
4.679	749.988	541.503	644.181	620.006	551.86	490.702	514.374	522.608	830.596	628.462	772.655
5.264	740.702	525.971	646.023	616.573	553.871	485.76	511.784	522.088	806.006	630.936	755.942
5.849	744.164	512.018	649.035	614.316	561.596	479.766	510.339	524.743	812.883	628.538	743.117
6.434	751.719	504.374	647.936	609.205	567.813	477.316	509.836	530.573	820.719	631.398	735.175
7.019	744.614	508.93	639.649	611.667	570.801	478.363	510.415	528.825	838.784	643.099	731.596
7.603	741.965	504.842	638	605.93	556.193	482.754	521.971	522.211	837.854	649.363	735.181
8.188	736.772	512.035	635.784	615.596	545.532	483.497	528.082	525.123	822.333	647.386	721.48
8.773	736.977	508.608	637.667	626.006	547.064	477.766	527.912	525.053	805.865	645.749	705.813
9.358	734.871	505.409	638.772	618.942	540.743	478.713	535.234	523.421	792.328	650.404	708.468
9.943	733.474	504.655	635.029	603.088	541.784	476.029	539.854	528.468	776.444	654.316	715.246
10.528	727.895	508.509	625.848	608.573	539.883	477.24	550.205	534.24	778.31	677.871	705.883
11.113	722.626	504.871	614.971	608.579	538	480.45	556.322	530.509	782.977	681.784	694.31
11.698	714.234	500.351	604.14	601.404	541.339	482.637	548.398	521.667	802.871	674.064	687.018
12.282	707.006	493.696	599.287	615.982	554.947	482.45	538.31	519.754	834.298	664.62	702.041
12.867	711.62	500.719	595.263	627.345	568.819	483.731	532.363	515.801	855.55	623.164	735.526
13.452	718.474	508.023	590.567	633.719	568.567	488.772	542.17	515.17	839.801	621.462	777.953
14.037	721.86	492.24	588.006	631.088	568.865	485.749	547.205	511.216	812.614	639.199	789.842
14.622	729.556	497.064	586.398	628.041	573.257	480.807	548.684	505.69	800.181	652.713	778.251
15.207	733.368	501.216	587.713	637.778	573.415	478	549.614	504.45	803.672	632.509	766.936
15.792	733.368	503.392	586.661	634.304	587.398	477.14	558.152	508.965	799.836	624.901	771.585
16.377	741.205	504.801	585.585	636.181	585.123	477.216	576.585	517.316	784.035	638	767.029
16.961	749.871	508.175	587.123	620.567	576.708	477.094	579.263	517.515	772.93	670.018	742.234
17.546	743.895	509.053	586.655	615.854	574.117	470.497	579.556	519.661	764.333	649.632	720.825
18.131	735.193	505.404	583.585	610.848	574.444	466.708	569.737	513.83	765.064	632.105	707.023
18.716	728.298	506.52	575.351	619.731	577.743	468.795	556.947	513.047	762.994	643.421	695.912
19.301	727.421	494.275	570.175	621.737	590.287	468.345	550.918	513.585	768.749	656.573	701.181
19.886	733.368	500.222	564.216	615.889	596.456	468.058	547.608	511.345	771.368	625.731	712.678
20.471	747.006	503.404	562.807	613.649	590.368	473.035	546.515	515.602	776.947	617.292	719.579
21.056	757.667	497.491	567.17	608.257	589.83	477.24	541.222	517.883	782.094	638.421	704.977
21.641	771.871	491.836	574.678	606.538	580.228	480.947	541.421	517.076	787.368	633.485	704.567
22.225	775.713	489.474	576.55	615.661	577.421	489.532	538.216	520.953	783.14	634.444	732.661
22.81	775.819	483.532	576.719	614.404	578.158	500.719	533.351	533.678	785.187	638.456	731.731
23.395	784.912	491.801	572	624.047	582.749	499.181	533.333	541.632	792.175	644.31	730.45
23.98	798.561	496.749	572.328	626.123	582.667	493.099	537.901	535.871	785.784	636.427	726.959
24.565	799.088	500.918	574.62	624.596	581.152	483.158	540.55	527.749	789.45	650.643	746.421
25.15	786.433	491.415	583.819	617.023	565.702	476.567	542.591	522.123	810.45	657.339	739.38
25.735	780.485	490.994	590.14	609.912	562.918	478.561	543.205	520.012	840.105	656.205	729.713
26.32	772.351	495.766	588.591	619.573	559.222	476.591	540.175	515.035	829.368	660.515	711.433
26.904	767.789	493.012	585.649	624.035	559.971	481.392	536.871	508.731	821.485	668.263	700.456
27.489	767.579	494.216	584.667	631.374	563.164	481.468	540.14	502.006	826.778	681.421	697.135
28.074	765.158	497.269	582.006	632.181	561.684	488.018	545.854	500.363	843.211	680.889	696.497
28.659	761.971	484.819	580.684	638.187	563.135	492.591	545.216	487.333	843.292	672.328	683.585
29.244	755.655	480.719	575.105	641.953	570.287	498.333	546.281	477.994	846.988	695.719	684.199
29.829	749.807	473.421	575.351	643.468	564.959	503.082	551.023	473.228	847.602	679.316	703.404
30.414	745.193	466.211	575.877	649.357	549.392	499.813	559.807	466.591	851.251	698.573	717.877
30.999	739.48	467.047	575.14	646.585	537.585	497.883	564.988	462.228	848.047	697.158	723.649
31.583	728.275	459.643	574.959	639.181	530.561	496.743	562.444	460.719	835.626	699.865	722.316
32.168	733.895	466.994	570.491	635.912	524.649	493.269	561.719	458.058	823.14	703.901	701.357
32.753	737.988	467.404	566.591	628.871	531.813	482.053	566.947	465.257	824.374	707.918	705.263
33.338	738.918	474.614	566.287	637.865	535.386	475.117	567.924	467.24	823.895	706.105	710.415
33.923	724.351	469.795	567.082	640.234	538.515	478.918	562.959	469.678	825.772	715.737	722.099
34.508	723.567	454.778	568.439	643.298	543.199	481.006	562.363	476.287	838.842	751.281	737.725
35.093	720.83	449.871	572.117	644.62	542.269	481.649	566.041	479.345	849.316	804.69	727.076
35.678	722.339	451.947	586.567	652.035	553.725	475.205	568.655	481.234	841.725	848.117	710.234
36.262	718.444	452.561	596.766	648.567	554.561	471.825	573.152	484.041	830.24	796.772	709.251
36.847	718.257	463.661	607.386	647.357	551.953	475.421	575.456	485.743	811.368	741.281	717.123
37.432	720.187	484.503	612.632	638.409	551.357	479.626	573.339	487.953	803.246	709.819	711.632
38.017	720.31	497.251	616.322	639.754	547.901	475.561	573.743	494.538	794.246	686.222	707.754
38.602	724.251	499.69	617.76	655.234	536.632	473.62	579.585	498.398	774.626	669.07	705.082
39.187	727.48	493.193	617.918	659.023	532.532	469.257	583.918	508.012	765.936	658.725	712.737
39.772	731.368	481.702	625.035	665.199	532.006	473.357	597.31	512.977	754.556	650.386	714.421
40.357	731.713	474.614	631.421	662.93	541.181	474.386	597.17	516.374	752.287	645.713	730.433
40.941	737.672	477.643	635.392	657.211	556.076	473.702	603.865	516.415	745.398	647.895	739.83
41.526	744.041	484.526	634.52	658.082	570.48	475.006	614.491	514.947	741.339	641.696	759.696
42.111	745.357	477.058	629.275	655.509	580.901	480.105	613.672	516.62	754.526	675.924	758.24
42.696	741.175	467.994	623.105	661.041	579.538	487.31	617.064	516.959	765.959	697.901	760.374
43.281	740.094	464.099	621.105	663.292	565.719	488.468	607.234	522.251	759.953	701.117	758.404
43.866	734.035	466.766	619.901	661.942	554.561	487.053	598.772	529.626	755.392	710.702	769.357
44.451	728.708	472.982	621.491	666.064	552.094	489.287	586.62	530.655	750.444	739.561	777.918
45.036	732.105	474.807	621.602	671.316	555.339	494.14	577.772	528.053	746.462	753.672	786.17
45.621	735.982	484.146	618.041	668.392	555.216	492.895	571.643	521.719	749.269	747.819	794.398
46.205	743.801	480.544	615.977	675.357	543.38	500.83	572.029	523.415	759.357	693.573	798.877
46.79	760.316	478.333	612.632	673.345	539.304	506.322	568.058	511.977	759.637	676.058	790.468
47.375	772.509	492.263	606.608	681.62	536.304	508.702	571.38	504.462	769.965	660.696	786.216
47.96	771.351	497.439	602.029	675.205	543.368	516.175	577.485	501.298	772.234	663.012	779.123
48.545	770.339	495.485	598.538	675.076	551.614	515.421	582.819	498.105	766.591	668.942	778.632
49.13	769.082	495.298	597.058	671.55	558.281	513.257	583.819	495.538	766.795	665.386	778.813
49.715	770.111	499.953	596.485	683.737	557.181	516.918	580.947	492.784	762.193	665.374	767.094
50.3	771.175	500.807	604.298	674.398	557.117	515.409	580.725	492.93	763.339	673.801	767.058
50.884	759.754	505.018	611.731	676.029	551.234	519.526	584.842	494.678	772.532	686.982	762.737
51.469	752.07	501.807	619.977	676.427	553.515	517.456	587.105	492.409	790.52	691.532	777.982
52.054	748.596	505.544	628.749	673.105	566.14	515.199	579.456	492.556	810.386	690.48	769.158
52.639	742.801	506.035	639.111	684.041	576.883	506.684	572.801	492.719	821.123	694.409	755.281
53.224	736.433	505.117	642.187	672.175	573.029	498.205	567.567	494.62	806.234	696.842	749.93
53.809	745.444	506.333	636.333	667.135	559.485	495.778	564.234	505.228	805.848	713.509	744.93
54.394	749.076	507.766	634.006	672.222	558.977	496.152	559.772	520.977	817.766	697.526	735.947
54.979	760.082	508.146	638.854	673.69	561.105	502.082	573.117	531.041	822.789	686.088	748.491
55.563	767.556	510.018	639.146	681.965	560.129	496.31	579.977	531.678	826.415	689.14	757.234
56.148	769.339	518.38	633.216	676.602	561.222	482.69	584.035	528.064	818.667	681.924	750.041
56.733	761.719	529.439	625.468	677.871	568.211	477.246	582.099	516.602	821.257	681.55	756.702
57.318	762.398	538.088	622.029	670.708	568.76	475.368	579.181	503.503	826.094	678.789	767.854
57.903	763.076	542.982	617.994	662.485	567.626	473.246	579.918	498.14	843.404	674.678	780.953
58.488	756.977	540.69	610.901	658.52	564.281	466.327	580.064	496.415	849.994	676.287	789.275
59.073	746.784	530.842	603.567	662.456	563.778	459.041	581.684	492.643	857.228	679.064	811.058
59.658	741.965	536.649	596.836	665.433	558.883	452.105	587.298	486.959	869.813	666.912	808.918
60.242	732.409	549.994	592.532	675.368	555.07	448.246	589.766	481.491	879.234	666.234	804.713
60.827	723.596	551.532	593.52	672.842	554.795	452.971	589.006	478.386	892.538	661.462	806.947
61.412	714.497	547.561	594.38	676.047	561.994	460.708	582.111	484.509	883.316	666.497	822.626
61.997	717.614	553.924	596.497	686.538	567.14	473.62	576.316	484.988	872.766	674.234	850.825
62.582	717.696	540.456	592.041	686.392	560.006	485.152	573.684	485.567	873.281	687.041	859.626
63.167	717.561	539.766	593.012	697.661	552.901	493.456	575.129	481.427	873.567	698.784	882.105
63.752	713.199	531.602	602.164	705.672	553.211	497.69	571.889	477.146	879.795	723.064	884.906
64.337	703.719	523.398	603.135	703.029	558.398	491.749	582.439	466.766	876.281	750.988	855.965
64.922	699.696	506.316	601.129	711.965	568.801	483.374	589.333	465.994	866.374	731.491	839.585
65.506	702.444	504.433	601.427	702.018	579.14	476.614	585.269	464.035	861.164	716.31	838.14
66.091	705.029	504.374	602.456	691.579	582.912	481.234	578.427	461.596	863.427	710.936	837.889
66.676	714.713	511.953	602.877	676.421	586.69	483.532	582.865	458.287	868.795	713.123	833.193
67.261	722.444	518.328	605.556	664.965	587.246	485.146	592.672	456.404	881.883	727.012	860.035
67.846	728.339	509.398	604.433	654.526	588.807	483.678	605.216	452.24	875.655	740.702	900.538
68.431	723.433	512.988	601.754	653.444	584.749	484.754	613.456	453.801	856.649	731.52	891.848
69.016	715.298	520.55	601.509	657.93	581.977	480.52	609.772	458.035	850.883	722.912	874.187
69.601	713.211	526.936	598.743	657.749	580.374	476.848	602.801	463.953	866.696	715.193	870.901
70.185	712.433	532.111	595.146	659.608	587.719	479.678	599.982	470.398	885.538	739.012	875.474
70.77	711.901	524.667	602.526	665.62	580.099	485.339	599.316	471.433	890.556	732.596	881.439
71.355	704.181	521.398	609.947	662.234	575.018	488.871	595.602	470.345	884.778	748.52	901.959
71.94	694.292	510.251	618.561	666.643	570.398	488.754	588.509	465.456	878.696	753.199	919.632
72.525	688.877	514.105	620.953	666.392	577.743	492.053	583.222	464.187	877.251	766.38	910.515
73.11	685.123	509.111	621.977	668.328	574.982	493.474	584.497	466.731	871.766	768.836	883.532
73.695	686.146	502.298	619.538	665.725	573.433	491.591	590.766	473.099	868.713	753.749	887.415
74.28	690.269	501.848	621.117	665.497	576.281	489.667	591.257	465.485	892.93	732.544	877.076
74.864	693.24	499.082	627.871	651.696	569.386	487.351	592.105	457.678	900.398	732.275	864.064
75.449	688.222	494.345	630.854	660.778	564.591	481.456	595.433	454.047	908.62	738.105	847.655
76.034	683.374	496.246	627.708	661.766	560.737	484.029	603.368	449.105	930.333	733.263	846.129
76.619	683.596	501.866	616.76	658.322	566.45	488.392	605.982	444.772	948.023	750.585	849.982
77.204	689.672	510.901	612.795	659.193	557.813	493.503	605.602	452.614	950.942	763.819	876.269
77.789	688.07	514.023	615.45	658.053	547.538	498.175	614.175	455.532	948.661	769.357	877.766
78.374	694.86	519.444	616.591	660.328	535.123	499.731	611.076	461.205	935.871	757.328	858.637
78.959	695.339	524.117	615.544	659.14	531.018	497.181	603.404	461.392	947.404	755.374	834.421
79.543	690.848	527.035	619.825	660.743	530.749	501.409	591.018	463.292	962.55	753.082	826.275
80.128	685.287	534.889	630.404	665.509	537.123	512.316	583.561	466.901	967.69	742.164	834.977
80.713	673.52	540.936	641.731	666.766	546.368	514.538	580.749	468.468	976.895	754.702	824
81.298	669.544	542.69	652.924	662.211	544.439	518.515	580.234	471.474	982.45	759.848	808.14
81.883	664.368	539.135	654.965	656.596	549.386	528.655	579.561	466.655	986.386	735.099	809.836
82.468	664.187	546.719	653.433	661.322	566.936	525.889	574.14	470.614	995.509	738.345	815.526
83.053	663.094	542.14	657.62	665.211	579.298	515.784	578.269	469.953	994.69	754.602	826.854
83.638	659.947	549.713	663.456	674.088	575.749	506.977	581.404	469.778	985.409	752.404	831.064
84.222	662.836	546.181	663.602	679.187	566.433	504.766	578.819	471.351	977.637	753.784	844.784
84.807	668.772	549.094	657.632	679.842	556.55	508.234	577.117	475.31	984.942	762.643	879.07
85.392	673.672	554.626	653.474	671.947	551.503	513.573	572.737	482.883	996.152	765.772	904.14
85.977	673.333	563.947	647.357	677.515	547.474	509.427	566.509	485.953	1008.58	763.871	887.585
86.562	672.585	566.433	642.684	677.86	537.351	499.38	561.532	482.216	994.655	758.749	868.158
87.147	673.07	562.52	637.363	670.678	536.374	492.626	559.807	478.415	979.719	753.111	863.064
87.732	671.123	557.55	632.31	674.83	531.082	496.035	557.433	478.327	977.532	735.848	860.749
88.317	670.018	552.281	625.251	675.205	522.661	497.099	562.193	476.918	965.982	751.415	845.14
88.902	671.637	553.515	618.012	669.058	512.111	493.947	568.942	479.801	951.632	773.38	834.942
89.486	684.76	555.895	614.094	665.228	511.222	493.456	569.918	481.848	942.251	801.626	823.877
90.071	688.006	546.62	610.503	656.655	505.345	492.918	574.661	480.982	937.848	782.672	830.357
90.656	690.497	538.023	602.035	655.053	511.433	491.649	579.749	477.655	931.129	805.567	841.012
91.241	690.041	533.322	602.187	661.632	521.31	495.561	588.012	472.082	918.825	832.778	863.918
91.826	689.731	524.357	605.404	662.14	538.632	500.637	595.947	470.211	917.93	851.661	885.181
92.411	688.053	532.485	613	666.275	550.883	499.871	609.287	468.965	916.076	832.865	901.567
92.996	684.292	539.713	624.737	678.602	556.345	501.368	623.971	468.129	898.117	801.322	900.515
93.581	679.491	549.433	631.93	684.269	555.76	504.947	624.234	472.041	887.602	792.409	897.959
94.165	688.83	553.187	635.637	690.836	550.889	508.363	616.368	477.45	881.93	776.614	884.117
94.75	696.363	553	643.275	698.825	542.842	508.778	618.965	479.772	870.351	732.222	896.947
95.335	706.93	550.667	655.035	696.93	534.152	504.673	622.328	476.561	863.503	692.55	901.795
95.92	712.497	553.386	662.38	698.585	527.784	504.444	616.409	475.959	864.614	673.836	899.632
96.505	723.795	546.743	665.474	697.526	530.07	506.275	605.193	472.152	853.865	681.959	899.076
97.09	730.45	540.901	666.468	699.345	533.789	511.86	599.579	463.766	854.117	716.012	890.971
97.675	731.404	543.175	658.281	699.193	532.228	516.415	594.316	459.012	880.363	730.515	891.439
98.26	738.263	539.333	649.848	711.444	532.222	522.456	590.596	459.76	910.386	727.064	894.129
98.844	743.462	542.52	643.164	713.795	533.164	525.474	593.38	459.228	920.778	703.205	881.754
99.429	752.953	543.275	641.298	711.526	532.696	522.848	600.924	459.462	920.83	711.298	876.906
100.014	759.731	547.556	640.596	709.602	535.234	514.696	599.199	463.45	915.708	719.696	863.819
100.599	759.725	549.626	645.474	711	538.111	506.561	592.901	473.567	922.544	732.357	868.719
101.184	763.187	555.596	641.175	715.304	528.906	497.573	590.994	475.807	923.216	739.222	895.012
101.769	760.912	567.111	637.281	710.912	532.573	497.509	591.047	476.83	914.222	712.152	918.164
102.354	750.392	568.234	635.094	713.684	545.708	498.561	586.655	481.234	918.497	710.175	926.602
102.939	749.38	559.854	637.094	716.357	556.374	501.094	595.462	481.55	930.216	720.117	890.485
103.523	743.959	557.912	636.222	717.269	565.462	512.181	599.76	486.889	950.789	726.474	855.532
104.108	746.48	560.596	636.626	710.994	576.047	516.871	602.099	490.573	969.094	724.895	851.45
104.693	754.123	558.754	641.316	713.561	594.099	522.409	609.883	498.018	984.871	728.889	848.029
105.278	755.415	551.544	654.292	714.427	592.368	521.287	614.012	507.45	985.058	711.982	856.637
105.863	757.567	553.784	656.281	710.684	582.246	526.012	619.743	514.456	981.743	693.959	878.333
106.448	753.731	552.292	653.322	711.14	572.485	540.515	626.532	523.193	991.737	709.333	878.415
107.033	750.292	548.877	654.421	702.807	566.251	550.152	626	532.69	982.094	730.55	875.772
107.618	745.24	544.281	660.877	693.234	558.848	550.684	624.614	532.515	949.257	735.421	882.83
108.202	742.731	543.018	671	683.023	545.544	542.977	632.228	532.702	935.251	745.596	870.854
108.787	749.52	554.45	678.029	674.76	539.579	542.485	647.234	532.772	933.585	756.865	873.485
109.372	765.398	570.415	675.409	674.526	532.058	545.094	653.784	531.053	944.117	778.129	895.491
109.957	775.351	585.491	674.146	683.561	531.69	551.07	652.626	526.842	936.895	843.251	909.392
110.542	785.363	598.877	669.83	696.906	540.749	556.48	654.368	528.392	918.936	857.105	937.187
111.127	790.251	599.298	660.848	702.772	550.953	555.573	658.427	537.404	889.491	844.123	964.713
111.712	773.158	596.83	655.48	718.468	554.977	551.076	653.544	542.17	873.883	780.614	960.825
112.297	769.064	601.585	657.076	712.959	560.351	541.83	648.117	542.52	883.31	733.433	949.561
112.882	772.292	603.199	663.164	714.737	572.193	547.918	639.544	542.848	913.784	718.433	922.661
113.466	780.111	599.175	665.439	700.263	577.187	552.468	632.228	546.614	927.971	735.018	896.901
114.051	788.977	597.503	669.649	704.164	586.181	556.222	631.819	542.795	916.731	772.602	901.561
114.636	784.532	602.801	670.287	712.386	602.632	559.193	628.491	539.181	889.789	796.497	901.094
115.221	773.819	609.351	675.012	710.31	606.456	561.713	621.064	544.561	877.298	789.883	917.187
115.806	774.006	622.058	685.421	710.058	597.608	568.749	616.632	544.398	872.614	817.76	944.035
116.391	769.117	606.982	701.088	696.211	588.895	571.31	608.906	549.456	861.333	856.643	980.789
116.976	757.374	607.965	712.538	689.333	587.468	569.023	608.819	549.444	851.094	904.754	994.281
117.561	742.842	605.906	720.532	691.509	594.17	574.304	610.76	555.187	858.216	897.55	977.526
118.145	736.86	604.211	716.48	686.912	608.678	586.38	613.515	560.526	860.491	867.982	960.047
118.73	739.205	597.836	714.263	691.789	614.211	591.392	614.731	560.801	877.439	823.754	955.427
119.315	743.328	601.901	726.298	691.24	627.023	594.509	621.257	564.333	893.591	803.246	946.573
119.9	745.415	590.404	741.912	686.591	624.298	597.608	631.784	565.895	889.24	789.456	936.485
120.485	749.567	586.743	748.649	685.731	615.064	601.058	645.012	554.684	874.374	756.889	937.257
121.07	756.433	583.661	745.848	701.865	611.567	599.854	653.667	545.058	858.228	748.596	951.573
121.655	765.386	582.187	744.164	705.345	614.292	595.778	663.69	543.023	851.585	748.725	944.678
122.24	778.304	580.094	743.234	715.713	634.819	592.175	662.953	543.058	847.228	742.567	927.918
122.824	777.848	579.31	742.45	709.234	652.871	591.38	664.462	538.936	850.351	769.713	937.211
123.409	778.158	591.93	748.649	712.819	642.117	587.836	672.38	540.328	857.082	770.713	962.895
123.994	787.509	605.889	759.702	711.749	627.883	582.246	675.795	540.567	845.181	753.772	985.725
124.579	797.713	603.357	763.439	723.848	630.515	575.52	663.275	547.532	819.614	788.579	993.076
125.164	802.965	603.988	763.895	729.725	638.257	567.099	649.444	561.836	802.731	830.76	983.094
125.749	806.111	600.906	765.602	722.485	638.994	565.942	645.433	574.45	798.433	854.596	989.474
126.334	805.842	615.667	763.211	713.655	631.637	574.509	646.444	582.38	799.614	855.14	1002.94
126.919	802.117	627.801	765.427	708.281	626.678	579.363	650.111	580.129	803.942	871.07	1013.95
127.503	799.146	633.889	769.404	707.509	624.836	584.17	649.175	570.901	802.251	878.246	1008.25
128.088	796.018	630.772	771.62	711.93	624.105	579.363	660.48	559.199	805.708	912.333	1024.53
128.673	785.825	620.719	775.556	719.819	635.164	585.789	673.491	552.573	809.62	877.444	1042.99
129.258	784.947	614.626	780.901	725.24	649.216	593.538	686.064	548.439	815.298	846.731	1048.18
129.843	778.24	603.398	788.175	725.708	660.263	593.058	686.251	544.503	822.123	819.702	1056.37
130.428	775.871	593.322	781.281	724.877	668.31	600.041	690.649	529.988	839.655	806.316	1053.89
131.013	787.918	589.491	766.877	732.211	671.023	599.895	692.433	526.07	850.094	799.556	1045.68
131.598	792.637	585.778	756.865	722.959	675.357	612.778	680.743	526.368	865.029	799.655	1036.64
132.183	809.585	597.094	749.468	723.222	673.082	626.702	673.322	526.48	864.836	810.731	1031.41
132.767	830.152	603.088	747.088	717.433	674.83	619.415	675.199	522.38	843.152	831.105	1038.72
133.352	845.094	609.936	752.503	721.404	664.298	608.228	678.982	523.889	818.936	839.982	1032.2
133.937	857.901	610.129	760.836	714.146	659.292	604.38	682.48	525.129	799.772	870.76	1035.64
134.522	856.86	630.626	778.836	712.158	652.152	608.31	678.099	535.772	803.187	868.14	1036.71
135.107	850.515	637.439	797.895	707.836	641.795	601.006	672.977	552.415	832.672	857.813	1014.27
135.692	840.368	656.76	810.918	703.936	637.012	610.509	666.205	559.246	846.439	863.655	987.275
136.277	820.322	659.439	818.789	708.538	633.064	624.731	661.041	563.292	857.731	854.772	971.275
136.862	804.754	652.643	827.018	711.421	629.076	634.135	669.415	564.029	876.363	841.462	972.146
137.446	798.953	657.041	834.795	706.637	629.538	641.023	682.719	568.251	883.322	835.626	965.404
138.031	792.415	666.205	849.69	722.345	644.263	640.175	692.398	572.784	885.632	852.789	979.573
138.616	787.614	661.825	858.877	734.485	669.836	637.737	704.667	577.152	880.819	871.099	1047.82
139.201	788.474	660.006	858.491	738.45	684.749	636.713	718.649	581.357	872.48	877.368	1137.68
139.786	790.532	649.088	849.959	741.503	673.515	644.708	719.918	584.713	876.86	883.129	1183.81
140.371	790.561	651.415	843.918	733.298	665.064	656.62	708.064	586.491	878.789	872.199	1189.11
140.956	799.298	645.754	847.152	742.181	674.977	669.678	702.357	594.257	892.62	860.17	1157.65
141.541	813.064	649.251	858.234	742.76	674.912	676.503	706.328	604.906	905.819	870.07	1124.19
142.125	818.193	647.52	866.269	755.556	655.263	676.064	701.392	607.181	901.281	906.965	1152.35
142.71	826.825	649.497	872.971	755.713	646.263	677.24	701.351	607.696	887.842	922.743	1176.75
143.295	831.503	660.164	876.45	760.053	638.825	682.889	707.684	610.901	881.702	896.924	1202.43
143.88	830.924	675.111	877.018	761.123	632.064	689.532	702.018	616.596	891.842	868.889	1243.35
144.465	829.573	677.152	879.684	753.977	629.333	702.69	706.614	614.702	907.035	878.175	1247.04
145.05	827.374	676.725	889.368	751.404	629.199	726.825	701.93	610.474	917.339	892.784	1210.62
145.635	827.789	688.608	897.848	747.047	629.754	744.404	701.047	607.614	936.69	891.906	1178.33
146.22	821.392	699.064	907.632	747.339	638.257	771.316	702.234	603.608	962.006	878.977	1146.81
146.804	823.351	711.328	921.643	735.392	657.345	773.485	702.889	601.064	986.971	871.304	1149.53
147.389	831.281	731.965	933.708	733.988	683.216	774.585	701.146	605.298	1016.12	895.462	1166.72
147.974	838.316	743.427	930.731	734.228	713.433	785.462	708.152	613.93	1068.05	897.333	1200.08
148.559	843.871	757.328	920.058	744.62	720.649	790.328	721.702	611.468	1095.85	888.351	1226.26
149.144	849.713	750.304	909.936	748.164	726.918	783.76	736.637	602.637	1094.32	863.374	1237.23
149.729	846.292	755.404	904.404	759.585	722.456	773.082	746.082	595.532	1066.16	857.053	1228.57
150.314	846.328	751.69	898.596	779.93	707.17	762.263	750.573	590.526	1018.89	878.135	1209.69
150.899	846.708	761.181	893.339	785.532	701.158	751.842	755.889	590.281	984.725	911.228	1210.87
151.484	851.345	770.099	889.556	788.023	707.006	738.749	762.965	586.585	972.415	956.152	1230.88
152.068	865.743	763.93	886.959	792.047	709.205	725.474	754.918	586.895	972.029	966.333	1233.41
152.653	881.637	764.48	885.737	804.643	712.374	723.14	743.146	592.269	987.889	941.655	1249.48
153.238	894.953	768.561	883.889	803.819	719.158	722.713	742.164	598.918	1000.56	945.398	1256.78
153.823	898.725	780.854	881.275	804.515	713.152	720.702	744.895	603.129	1003.64	939.614	1266.88
154.408	897.064	799.491	886.164	802.158	715.316	717.55	751.292	608.485	1002.99	948.637	1293.23
154.993	897.567	786.304	892.082	789.041	723.205	724.105	754.561	609.556	1007.65	946.269	1300.44
155.578	895.404	800.743	893.538	803.433	744.585	732.234	744.672	608.719	1012.47	952.099	1295.26
156.163	894.082	801.632	894.275	805.386	741.684	738.591	742.462	606.526	1017.4	914.374	1294.82
156.747	883.801	783.93	890.702	801.754	732.211	741.848	729.749	601.251	1042.61	918.62	1286.06
157.332	874.094	763.614	893.754	794.585	733.292	751.187	725.427	594.392	1059.87	899.111	1299.56
157.917	869.737	755.058	904.076	788.269	726.409	742.275	713.14	589.813	1072.52	919.749	1345.61
158.502	869.959	745.491	914.667	797.058	698.497	740.819	704.895	594.211	1079.36	956.035	1389.56
159.087	872.105	746.901	925.187	812.269	688.228	752.667	695.556	599.556	1082.05	992.608	1386.8
159.672	884.842	760.351	932.357	819.924	681.345	764.094	695.965	604.883	1076.47	1007.5	1349.25
160.257	899.316	778.287	936.427	830.076	683.684	757.158	703.877	613.023	1073.94	1013.55	1318.12
160.842	912.889	776.55	940.105	838.491	689.901	750.257	716.333	624.374	1064.67	1012.84	1282.07
161.426	918.585	774.17	941.099	845.667	696.38	748.088	733.146	631.368	1075.71	1016.86	1256.16
162.011	918.281	782.865	946.14	836.959	706.468	750.708	744.895	633.439	1112.74	1016.37	1267.47
162.596	921.14	796.38	941.819	836.287	716.678	753.696	743.567	639.532	1148.28	1020.78	1283.01
163.181	922.368	796.959	937.556	846.48	719.146	757.906	734.363	647.76	1178.37	1047.31	1294.99
163.766	919.614	796.386	928.345	850.152	726.865	765.895	737.708	662.316	1196.96	1056.22	1291.19
164.351	924.222	793.877	917.684	843.035	719.351	781.129	745.333	672.316	1203.06	1070.36	1275.8
164.936	922.883	787.298	910.591	826.585	706.62	802.526	752.187	672.515	1200.36	1065.04	1295.33
165.521	923.152	794.632	909.801	823.275	697.544	824.971	760.345	673.333	1192.98	993.725	1314.73
166.105	928.064	819.789	910.164	828.725	699.427	848.678	754.152	679.164	1180.46	974.292	1346.61
166.69	929.743	825.789	906.404	836.591	699.626	854.357	741.123	685.789	1160.35	970.497	1338.35
167.275	928.912	838.947	909.772	850.784	701.667	853.678	740.257	694.626	1144.58	976.427	1317.05
167.86	927.977	854.333	923.784	859.807	712.439	846.643	732.678	699.55	1137.84	983.415	1310.96
168.445	926.263	868.573	939.959	863.304	727.152	832.924	732.468	698.006	1141.79	948.515	1307.4
169.03	927.363	877.304	952.906	879.135	738.813	816.386	730.901	694.731	1151.88	942.819	1326.48
169.615	936.591	899.942	953.216	880.17	740.205	812.977	727.135	699.07	1173.77	949.626	1345.74
170.2	942.404	901.637	946.029	875.018	720.55	818.14	728.222	695.345	1199.7	945.023	1373.5
170.784	949	906.351	947.708	859.977	708.813	826.708	739.778	697.678	1185.93	941.661	1428.14
171.369	958.304	926.573	962.713	849.579	703.24	816.328	743.339	708.24	1164.61	941.854	1450.92
171.954	979.965	951.251	979.538	834.31	692.053	820.626	734.269	718.678	1151.91	942.509	1412.64
172.539	988.251	962.421	988.69	833.456	680.924	827.947	727.129	729.994	1123.21	939.468	1390.01
173.124	998.363	957.889	993.871	818.865	672.515	828.749	730.836	741.018	1111.4	927.684	1396.89
173.709	1006.09	947.848	995.567	818.743	673.719	832.088	744.754	751.304	1114.07	919.936	1419.29
174.294	1014.94	951.439	994.287	818.345	666.433	838.398	753.333	753.316	1115.55	908.573	1457.55
174.879	1018.6	957.298	989.684	830.31	656.953	838.222	751.836	755.094	1126.02	917.006	1514.46
175.464	1023.65	977.503	986.14	842.889	661.731	837.661	742.006	752.982	1132.01	936.556	1562.58
176.048	1027.33	990.205	983.48	845.515	669.053	829.088	726.339	742.392	1150.29	967.515	1592.87
176.633	1027.88	1011.51	973.409	851.515	671.211	827.69	706.029	728.076	1172.89	996.474	1598.27
177.218	1027.28	1014.63	958.076	849.836	675.643	839.111	686.819	718.655	1199.7	1002.44	1553.35
177.803	1036.32	1002.27	944.614	863.515	688.596	847.129	675.731	720.854	1219.36	998.965	1523.36
178.388	1043.31	981.491	930.158	867.895	699.515	845.175	670.854	727.602	1236.99	988.579	1548.77
178.973	1052.53	963.836	910.035	868.456	720.567	830.368	672.848	740.456	1244.91	1031.74	1585.81
179.558	1055.01	956.234	898.468	856.076	754	820.842	679.298	748.456	1264.47	1052.17	1617.07
180.143	1059.93	949.725	891.579	857	775.135	826.848	690.018	748.281	1275.39	1051.61	1609.28
180.727	1071.26	958.158	885.731	860.474	775.825	851.351	692.222	755.228	1287.92	1056.61	1602.42
181.312	1072.46	966.865	879.228	864.971	766.146	879.784	698.439	751.62	1301.36	1070.96	1614.8
181.897	1076.06	969.538	876.064	867.649	757.76	899.86	700.93	753.328	1300.1	1059.67	1592.64
182.482	1076.75	970.357	872.322	871.17	746.655	919.906	700.251	768.655	1263.6	1077.36	1578.19
183.067	1080.08	988.637	872.398	876.404	736.187	937.661	697.649	776.199	1238.13	1086.27	1549.04
183.652	1080.53	996.199	876.772	861.86	731.491	938.193	685.287	787.135	1214.55	1074.83	1541.9
184.237	1082.99	998.468	880.515	859.322	734.345	928.702	674.38	794.444	1179.57	1064.11	1538.13
184.822	1085.62	1007.54	883.579	847.433	742.883	911.585	670.181	788.959	1148.55	1080.65	1544.53
185.406	1099.99	1037.17	890.257	831.041	746.082	898	675.515	771.246	1130.02	1116.04	1512.06
185.991	1117.91	1046.84	899.86	820.749	741.012	897.31	683.082	755.117	1107.41	1138.34	1486.21
186.576	1118.26	1026.32	903.626	816.439	737.129	896.415	683.374	753.854	1095.74	1134.7	1496.67
187.161	1121.78	1020.5	904.374	824.193	742.357	898.813	674.561	747.813	1100.05	1153.64	1478.26
187.746	1138.84	1022.68	907.784	822.515	741.994	896.246	673.298	742.953	1108.61	1186.28	1450.92
188.331	1151.48	1030.63	912.175	828.947	757.222	892.099	677.146	737.468	1118.39	1194.64	1421.56
188.916	1146.83	1034.41	907.328	834.07	773.684	888.702	680.515	732.83	1124.61	1193.73	1406.85
189.501	1154.95	1045.02	896.713	841.17	772.725	877.719	685.924	728.667	1123.01	1167.35	1413.14
190.085	1159.04	1052.2	877.433	840.298	761.795	881.205	681.918	728.474	1106.52	1137.29	1416.29
190.67	1151.48	1068.4	859.304	840.287	762.094	883.632	680.14	731.152	1069.62	1123.35	1386.41
191.255	1141.73	1062.68	846.678	834.825	770.368	896.754	678.69	734.497	1045.36	1114.8	1345.6
191.84	1139.73	1057.75	842.088	829.199	776.994	901.474	677.193	730.48	1027.14	1101.95	1338.53
192.425	1157.91	1064.13	841.158	824.357	771.76	899.591	676.667	725.708	1015.02	1075.35	1361.04
193.01	1181.36	1059.16	840.602	821.497	768.322	902.901	689.14	725.556	1011.22	1068.3	1394.12
193.595	1209.18	1042.6	839.333	816.626	770.83	915.749	690.684	718.345	1015.77	1059.26	1435.35
194.18	1231.71	1023.39	839.743	824.626	783.333	924.807	692.643	717.246	1035.97	1069.26	1457.01
194.764	1231.63	997.099	843.088	821.596	781.105	915.848	697.842	717.848	1043.45	1074.45	1475.11
195.349	1220.69	965.807	842.275	830.567	784.819	899.392	697.509	727.211	1033.06	1090.67	1473.82
195.934	1214.71	956.614	845.292	833.012	787.281	890.69	695.304	736.86	1020.83	1139.87	1451.63
196.519	1206.72	955.485	853.17	816.784	775.509	899.953	684.877	742.415	1026.26	1102.48	1425.01
197.104	1188.41	971.62	865.31	805.947	760.69	904.632	673.012	748.105	1026.13	1064.15	1385.81
197.689	1169.19	993.667	879.111	798.807	741.55	892.708	669.509	758.573	1030.11	1057.74	1355.64
198.274	1164.64	991.602	894.427	807.895	730.801	887.947	663.088	765.766	1014.56	1036.63	1341.87
198.859	1169.1	996.058	904.655	788.55	731.035	883.181	657.725	773.181	1007.64	1037.64	1313.69
199.444	1170.81	980.497	911.982	780.199	738.83	884.304	659.485	775.491	1014.2	1022.56	1297.44
