# Supplementary material for: DCC regulates astroglial development essential for telencephalic morphogenesis and corpus callosum formation
Source: eLife. 2021 Apr 19;10:e61769. doi: 10.7554/eLife.61769 (PMC8116049; doi:10.7554/eLife.61769)
Supplement: Figure 6—source data 1. [file elife-61769-fig6-data1.xlsx]

## Sheet: Figure 6E
Figure 6E: Ratio of IHF length / total midline length in P0 Dcc cKO mutant mice
Ventral horizontal section; cre-negative IHF length ratio	Ventral horizontal section; cre-positive IHF length ratio	Middle horizontal section; cre-negative IHF length ratio	Middle horizontal section; cre-positive IHF length ratio	Dorsal horizontal section; cre-negative IHF length ratio	Dorsal horizontal section; cre-positive IHF length ratio
0.504339	0.871875	0.512134	1	0.569975	1
0.48177	0.616493	0.480748	0.896495	0.550533	1
0.483418	0.634626	0.524409	1	0.595582	1
0.497859	0.504436	0.516211	0.550858	0.534601	0.633681
0.532566	0.526731	0.4777	0.572644	0.579162	0.624467
0.469135	0.594551	0.4999	0.611787	0.626944	0.671715
	0.546167	0.519763	0.558152	0.670931	0.696857
	0.635957		0.789283		1
	0.715986		0.629558		0.675488
	0.554369		0.569728		0.660087
	0.699165		0.520487		0.640553
	0.725548		0.627867		0.636357

## Sheet: Figure 6F
Figure 6F: Ratio of CC length / total midline length in P0 Dcc cKO mutant mice
Ventral horizontal section; cre-negative CC length ratio	Ventral horizontal section; cre-positive CC length ratio	Middle horizontal section; cre-negative CC length ratio	Middle horizontal section; cre-positive CC length ratio	Dorsal horizontal section; cre-negative CC length ratio	Dorsal horizontal section; cre-positive CC length ratio
0.0822037	0	0.179434	0	0.162783	0
0.0506218	0	0.148746	0	0.193179	0
0.127364	0	0.19174	0	0.168151	0
0.0800277	0	0.145354	0.184668	0.183818	0.176543
0.0941297	0.109109	0.143634	0.157064	0.180826	0.169923
0.0978626	0	0.190124	0.16957	0.142393	0.14003
	0.086389	0.17318	0.229269	0.138969	0.147057
	0		0		0
	0		0.145097		0.119711
	0.0660374		0.199413		0.112364
	0		0.101261		0.165001
	0		0.111497		0.213506

## Sheet: Figure 6G
Figure 6F: Ratio of CC depth / total midline length in P0 Dcc cKO mutant mice
Ventral horizontal section; cre-negative CC depth ratio	Ventral horizontal section; cre-positive CC depth ratio	Middle horizontal section; cre-negative CC depth ratio	Middle horizontal section; cre-positive CC depth ratio	Dorsal horizontal section; cre-negative CC depth ratio	Dorsal horizontal section; cre-positive CC depth ratio
0.504339	0.526731	0.512134	0.550858	0.569975	0.633681
0.48177	0.546167	0.480748	0.572644	0.550533	0.624467
0.483418	0.554369	0.524409	0.611787	0.595582	0.671715
0.497859		0.516211	0.558152	0.534601	0.696857
0.532566		0.4777	0.629558	0.579162
0.469135		0.4999	0.569728	0.626944
		0.519763	0.520487
			0.627867

## Sheet: Figure 6H
Figure 6H: Ratio of HC length / total midline length in P0 Dcc cKO mutant mice
Ventral horizontal section; cre-negative HC length ratio	Ventral horizontal section; cre-positive HC length ratio	Middle horizontal section; cre-negative HC length ratio	Middle horizontal section; cre-positive HC length ratio	Dorsal horizontal section; cre-negative HC length ratio	Dorsal horizontal section; cre-positive HC length ratio
0.184169	0.0347484	0.132408	0	0.132225	0
0.226447	0.0868616	0.172112	0	0.118765	0
0.165165	0.0757025	0.147273	0	0.141333	0
0.220171	0.22373	0.165926	0.170799	0.135029	0.141448
0.247197	0.185744	0.167587	0.176284	0.151432	0.160483
0.239787	0.10534	0.157857	0.168809	0.142192	0.148884
	0.194675	0.134415	0.174533	0.142588	0.138277
	0.0228045		0.0928972		0
	0.157695		0.204351		0.188876
	0.120335		0.157725		0.215991
	0		0.0715345		0.140336
	0.0467402		0.0859744		0.123846

## Sheet: Figure 6I
Figure 6H: DCC IF (% of control) in P0 Dcc cKO mutant mice
DCC IF (% of control mean) in cre-negative cingulate cortex	DCC IF (% of control mean) in cre-positive cingulate cortex	DCC IF (% of control mean) in cre-negative intermediate zone	DCC IF (% of control mean) in cre-positive intermediate zone
110.76	75.9003	96.8556	56.2104
87.64	75.2838	109.395	72.7707
101.6	77.9076	93.7499	58.631
107.824	78.3194	99.0229	59.2234
92.9065	71.8105	87.7324	62.3012
99.2698	80.8076	113.245	54.6384
	98.9051		62.187
	83.887		63.0593
	81.1646
	108.487		64.0756
	70.0208		87.3555
	76.9297		54.2691
	70.4649
	73.4865		63.9906
	82.6998		59.9061
			60.4
			64.2872

## Sheet: Figure 6J
Figure 6J: Relationship between the ratio of CC size / total midline length and ratio of IHF length / total midline length in id-horizontal sections of P0 Dcc cKO mutant mice
Ratio IHF length	CC size control	CC length cre-pos
0.512134	0.179434
0.480748	0.148746
0.524409	0.19174
0.516211	0.145354
0.4777	0.143634
0.4999	0.190124
0.519763	0.17318
0.522555	0.153167
1		0
0.896495		0
1		0
0.550858		0.184668
0.572644		0.157064
0.611787		0.16957
0.558152		0.229269
0.789283		0
0.629558		0.145097
0.569728		0.199413
0.520487		0.101261
0.627867		0.111497

## Sheet: Figure 6K
Figure 6K: Relationship between the ratio of HC size / total midline length and ratio of IHF length / total midline length in id-horizontal sections of P0 Dcc cKO mutant mice
Ratio IHF length	HC length control	HC length cre-pos
0.512134	0.132408
0.480748	0.172112
0.524409	0.147273
0.516211	0.165926
0.4777	0.167587
0.4999	0.157857
0.519763	0.134415
0.522555	0.179272
1		0
0.896495		0
1		0
0.550858		0.170799
0.572644		0.176284
0.611787		0.168809
0.558152		0.174533
0.789283		0.0928972
0.629558		0.204351
0.569728		0.157725
0.520487		0.0715345
0.627867		0.0859744

## Sheet: Figure 6O
Figure 6O: DCC IF in E15 Dcc cKO mutant mice
DCC IF (% of control mean) in cre-negative cingulate cortex	DCC IF (% of control mean) in cre-positive cingulate cortex	DCC IF (% of control mean) in cre-negative telencephalic hinge (MZG)	DCC IF (% of control mean) in cre-positive telencephalic hinge (MZG)
905.83	526.13	661.297	486.794
773.176	476.841	539.27	487.797
610.637	569.875	490.525	532.275
613.924	591.439	497.685	540.823
665.374	660.803	545.475	541.075
	455.441		546.139

## Sheet: Figure 6P
Figure 6P: GAP43 IF adjacent to the IHF in E15 Dcc cKO mutant mice
GAP43 IF in cre-negative septum	GAP43 IF in cre-positive septum
962.282	1208.32
1425.69	1117.38
1279.36	1286.4
1421.41	1372.31
1952.55	1219.23
	1164.19

## Sheet: Figure 6R
Figure 6R: GLAST-positive/TDTOMATO-positive MZG cell bodies in E15 Dcc cKO mutant mice
GLAST-positive/TDTOMATO-positive MZG cells in cre-positive midline
50
22
19
16
14
6
