# Supplementary material for: DCC regulates astroglial development essential for telencephalic morphogenesis and corpus callosum formation
Source: eLife. 2021 Apr 19;10:e61769. doi: 10.7554/eLife.61769 (PMC8116049; doi:10.7554/eLife.61769)
Supplement: Figure 7—figure supplement 1—source data 1. [file elife-61769-fig7-figsupp1-data1.xlsx]

## Sheet: Figure 7-S7B
Figure S7B: U251 cell area following overexpression of DCC:TDTOMATO, DCCKANGA:TDTOMATO or TDTOMATO only (control)
Cell area (µm2) TDTOMATO	Cell area (µm2) DCC-TDTOMATO	Cell area (µm2) DCC(M743L)-TDTOMATO
1701.83	1391.46	1331
948.509	4524.69	469.985
927.612	755.957	445.311
1432.4	1645.74	950.899
1246.46	2936.66	699.439
1820.79	787.242	722.256
489.505	1587.36	762.612
742.857	2033.56	3568.96
679.527	617.149	936.019
508.37	1219.22	567.696
570.112	1275.61	1375.07
861.605	2864.93	765.115
1059.52	2227.96	768.865
389.422	1148.8	2385.24
462.607	894.582	672.977
969.215	1152.58	1786.63
761.356	1776.88	1541.18
1143.73	1131.85	761.068
541.792	1420.33	656.484
1584.52	1487.91	882.834
1490.24	713.464	1424.49
388.052	860.34	746.407
533.044	950.559	1256.03
809.605	1003.4	1134.43
642.608	1091.34	767.574
1602.05	6654.68	1797.5
2235.33	1288.28	1033.19
380.394	608.758	606.84
446.977	573.016	1081.14
328.595	474.442	1334.59
749.363	2091.73	580.901
640.654	1726.71	530.332
875.594	1891.82	562.725
511.126	3392.06	950.402
465.624	822.662	1529.28
1036.73	1035.35	1542.09
822.67	840.96	708.039
714.127	1559.54	2161.7
423.69	775.607	758.704
913.735	2104.23	517.135
1007.69	1463.22	2530.28
1733.61	4157.56	1201.42
825.644	2375.31	1385.81
604.886	1304.74	1050.83
483.74	2174.79	724.593
1349.91	3827.96	1530.78
378.798	9138.67	815.475
255.175	1606.29	377.917
342.393	2728.99	851.391
982.141		2457.84
741.217		1359.98
691.808		1097.7
474.669		2983.14
428.33		1804.33
2321.25		1275.99
395.771		935.575
642.957		806.029
		1384.09
		1679.48

## Sheet: Figure 7-S7G
Figure S7G: N2A cell perimeter following overexpression of DCC:TDTOMATO, DCC:TDTOMATO carrying a mutation or a myr-TDTOMATO (control)
Cell perimeter (µm) Myr-TDTOMATO + vehicle	Cell perimeter (µm) DCC-TDTOMATO + vehicle	Cell perimeter (µm) Myr-TDTOMATO + NTN1	Cell perimeter (µm) DCC-TDTOMATO + NTN1	Cell perimeter (µm) DCC(M743L)-TDTOMATO + NTN1	Cell perimeter (µm) DCC(V753M)-TDTOMATO + NTN1	Cell perimeter (µm) DCC(A893T)-TDTOMATO + NTN1	Cell perimeter (µm) DCC(V848R)-TDTOMATO + NTN1	Cell perimeter (µm) DCC(H857A)-TDTOMATO + NTN1	Cell perimeter (µm) DCC(V793G)-TDTOMATO + NTN1	Cell perimeter (µm) DCC(G805E)-TDTOMATO + NTN1	Cell perimeter (µm) DCC(M1217V;A1250T)-TDTOMATO + NTN1
180.404	467.282	161.498	358.59	207.956	135.495	99.464	82.958	148.123	275.967	121.958	217.295
98.122	732.016	202.396	134.987	169.407	97.095	66.181	63.995	150.498	89.331	209.635	160.165
119.198	201.848	157.504	367.435	460.997	171.985	168.095	122.999	178.641	308.244	306.13	195.568
137.882	301.592	148.55	375.187	247.338	95.721	292.487	873.933	354.823	116.946	283.799	227.8
194.121	316.473	181.667	878.521	160.568	59.845	219.787	239.124	289.563	564.395	228.429	139.784
280.081	478.554	263.483	758.743	114.967	138.794	206.813	233.073	117.729	254.129	179.099	144.553
199.649	559.139	269.494	423.787	295.538	188.818	152.195	167.681	102.385	145.922	71.012	87.424
272.794	241.191	232.435	335.98	214.729	263.695	243.366	115.72	215.649	150.421	504.252	136.207
85.242	255.719	231.371	977.669	408.115	181.692	153.855	164.685	239.187	214.816	215.761	165.934
84.876	206.074	366.436	428.438	80.276	141.335	138.968	92.331	211.762	341.903	151.872	115.486
136.658	913.306	230.652	423.293	140.913	186.048	190.18	112.822	278.479	106.578	131.786	144.699
217.71	854.219	232.346	90.806	94.008	208.929	268.605	391.079	77.188	136.461	148.239	234.318
190.425	909.115	150.667	140.844	457	116.723	126.009	190.566	246.503	110.268	112.002	202.587
136.989	973.089	153.801	164.273	355.312	231.966	154.962	103.108	245.672	267.689	339.5	140.093
87.299	1037.21	188.414	168.323	339.675	354.596	89.488	173.809	200.639	154.432	455.526	149.781
61.786	96.189	186.008	192.942	65.337	256.699	114.85	82.668	178.582	273.491	221.348	97.913
256.532	165.243	521.131	97.97	72.968	191.455	320.797	198.954	393.434	358.141	72.864	148.464
107.019	199.034	310.847	233.477	102.919	207.831	217.382	483.025	104.073	255.991	132.641	213.147
95.105	310.738	571.241	79.252	350.165	66.89	295.633	148.774	99.872	311.807	135.259	202.84
104.207	208.529	141.608	81.908	289.674	88.884	131.41	253.198	95.907	142.138	163.254	199.698
184.366	100.828	120.67	69.357	105.884	76.985	271.226	195.539	158.969	139.067	242.649	112.537
337.127	1226.28	193.078	75.399	269.707	228.94	245.681	88.334	499.43	171.076	125.912	153.289
670.738	366.119	248.362	50.221	181.114	236.597	1184.82	263.334	179.1	131.11	107.863	147.152
169.385	800.768	386.475	203.715	160.509	417.44	270.55	290.439	88.022	426.203	278.342	159.036
173.255	624.45	277.266	109.626	241.626	382.639	314.214	346.219	129.486	384.541	101.926	383.426
231.088	99.981	132.391	194.293	221.733	150.747	468.007	125.709	657.444	132.238	167.67	161.846
369.195	142.538	296.817	87.36	298.64	324.855	80.033	422.058	270.068	134.81	88.074	223.064
360.225	393.559	376.767	159.118	163.036	233.813	238.218	346.458	1151.14	282.589	478.318	123.724
323.807	212.131	401.748	66.983	132.736	140.076	153.402	211.81	1242.57	445.76	363.065	106.095
211.834	319.967	211.954	70.846	122.436	123.84	252.85	441.604	243.666	128.227	251.425	98.543
301.861	254.704	253.489	169.037	197.111	221.016	121.665	317.463	100.828	173.543	392.009	310.949
283.606	361.719	187.741	89.591	267.13	284.514	149.51	566.469	132.85	94.844	359.84	252.107
133.518	527.32	197.77	124.73	301.646	184.015	254.714	117.598	274.805	97.727	316.999	225.569
210.685	605.719	301.571	81.843	183.442	347.459	146.686	67.189	124.127	101.233	330.099	318.152
145.655	956.599	136.08	67.301	285.161	349.926	356.108	67.206	246.617	241.332	272.073	185.358
148.497	816.099	128.603	248.578	555.54	124.136	230.277	430.736	212.056	79.639	575.194	216.763
124.227	395.244	123.068	241.311	278.846	183.404	87.888	320.485	589.325	125.682	121.373	270.79
171.32	306.757	121.392	110.823	181.913	259.45	333.958	210.388	284.206	157.006	95.814	521.552
201.722	217.451	221.396	309.322	289.121	180.304	154.377	139.063	255.132	205.705	242.902	111.946
102.744	300.401	102.569	206.604	444.413	888.404	217.759	337.848	322.53	461.984	265.376	136.071
153.005	721.116	305.986	123.711	227.052	255.174	262.279	432.819	204.526	167.782	192.076	165.038
147.022	539.709	243.935	108.556	306.928	314.518	365.418	303.641	246.786	246.758	297.416	332.354
174.152	510.515	84.303	300.815	195.144	157.817	609.528	522.796	94.872	253.79	593.625	235.741
206.526	477.966	154.022	247.107	282.764	106.893	50.434	280.524	350.593	285.791	68.422	187.663
211.144	409.682	383.129	318.352	570.109	287.633	666.488	247.396	248.362	91.106	172.327	519.112
562.811	322.985	479.98	344.458	129.23	94.136	156.634	779.604	256.713	96.801	89.39	206.565
125.021	296.406	244.996	207.619	249.952	150.053	221.92	254.21	155.155	59.032	121.55	429.524
365.453	558.517	371.686	157.482	320.902	197.573	542.768	308.88	399.583	93.875	68.715	696.121
206.05	237.172	347.273	164.834	107.148	319.421	295.489	298.886	268.479	249.439	226.894	367.942
169.878	282.557	78.058	507.159	204.027	180.316	350.076	269.618	92.608	87.826	204.282	149.66
209.788	114.973	88.653	643.531	314.527	109.232	376.736	686.189	143.92	102.277	170.267	443.441
266.867	554.05	91.103	838.454	223.814	62.358	235.104	429.839	252.961	352.081	280.004	254.694
368.988	286.219	125.174	391.217	598.41	273.15	305.376	77.604	328.958	180.609	306.547	620.067
466.297	894.642	68.016	232.628	301.285	870.535	621.272	439.977	626.843	311.632	256.419	448.694
557.595	450.127	330.167	107.272	402.637	209.749	525.641	91.077	130.107	486.862	120.519	377.89
260.608		227.57	116.788	100.106	86.094	605.472	114.161	267.404	71.398	159.302	375.807
226.653		84.82	357.177	299.224	73.851	279.269	352.365	151.737	196.518	253.84	258.695
103.614		363.26	413.429	254.648	891.296	602.632	172.986	179.419	363.006	213.505	599.266
200.603		463.849	147.397	329.095	359.56	608.894	366.657	125.637	100.363	184.875	141.582
139.861		253.823	163.968	162.468	257.443	411.159	121.378	396.789	310.66	164.248	69.054
211.682		187.81	171.74	171.464	200.217	388.209	134.188	602.355	197.444	321.424	121.919
247.982		221.874	160.968	370.23	341.819	96.257	302.799	361.778	132.615	368.553	242.25
376.535		385.057	224.19	216.134	564.892	357.256	325.402	666.149	181.141	137.691	89
142.937		262.599	1139.54	293.608	438.316	245.993	117.59	825.59	328.79	209.438	198.411
181.183		324.466	83.669	371.451	345.381	310.27	291.56	101.566	219.416	85.361	311.455
169.737		442.244	108.299	252.091	296.353	271.201	112.922	372.259	293.839	287.074	337.555
390.565		217.544	866.273	333.098	255.395	182.825	211.813	202.623	204.242	473.231	539.859
506.122		316.831	205.36	249.78	523.778	229.807	226.748	228.136	274.667	485.368	289.242
94.861		173.982	355.715	135.46	411.584	527.369	163.564	150.61	235.714	155.962	198.722
314.66		231.005	371.643	103.044	239.554	235.759	178.575	219.835	486.599	284.802	130.656
248.235		285.33	326.465	262.438	319.034	319.823	307.982	576.411	117.732	128.21	105.598
386.463		275.952	748.543	240.481	130.453		263.175	124.736	388.775	213.615	104.91
328.096		277.641	228.997	301.677	99.834		247.461	203.753	462.854	450.312	864.267
158.509		456.774	381.072	591.795	341.947		461.759	126.674	190.261	569.582	171.616
133.072		417.733	300.093	181.278	321.88		182.183	444.512	114.759	305.797	270.352
118.804		375.735	502.321	587.654	88.665		304.732	166.262	194.316	298.578
275.708		103.945	177.056	280.838	119.954		232.189	338.944	422.759	315.632
270.185		231.039	514.651		517.191		252.535		166.796	267.352
126.728		334.612	411.309		476.173		89.832		114.437	249.806
153.543		104.919	231.665		218.121		208.135		105.683	231.588
287.944		250.846	223.281		244.221		169.587		116.613
227.963		396.232	272.803		113.679		188.072		326.501
218.644		260.133	400.458		121.271		337.684		276.216
158.557		181.385	172.809		73.694		305.156		290.925
172.586		277.349	182.7		570.735		310.266		222.654
249.879		309.911	232.54		399.53		244.611		173.849
148.957		195.624	156.377		492.397		231.142
86.523		169.299	814.722		439.07		564.074
148.688		255.431	428.62		226.439		224.084
501.328		260.521	235.666		409.799		282.284
		74.338	243.602		182.936		106.837
		66.538	343.18		528.068		276.999
		137.735	119.61		129.304
		199.309	603.172		162.037
		121.53	208.246		401.181
		123.478	280.951
		220.003	446.741
		193.821	343.212
		485.701	1250.49
		248.085	496.379
			1324.04
			817.71
			492.748
			330.12
			1061.88
			790.919
			732.568
			461.326
			411.551
			520.197
			233.53
			319.204
			195.482
			392.013
			627.159
			895.644
			896.093
			368.812
			468.864
			285.327
			281.353
			360.248
			389.815
			493.538
			506.661
			405.17
			364.328
			559.179
			521.184
			478.498
			243.969
			564.519
			344.77
			373.811
			145.989
			753.28
			408.474
			185.623
			287.262
			380.442
			291.798
			353.967
			330.184
			417.043
			404.367
			748.543
			228.997
			381.072
			300.093
			502.321
			177.056
			514.651
			411.309
			231.665
			223.281
			272.803
			400.458
			172.809
			182.7
			232.54
			156.377
			814.722
			428.62
			235.666
			243.602
			343.18
			119.61
			603.172
			208.246
			280.951
			446.741
			343.212
			1250.49
			496.379
			1324.04
			817.71
			492.748
			330.12
			1061.88
			790.919
			732.568
			461.326
			411.551
			520.197
			233.53
			319.204
			195.482
			392.013
			627.159
			895.644
			896.093

## Sheet: Figure 7-S7H
Figure S7H: N2A cell circularity following overexpression of DCC:TDTOMATO, DCC:TDTOMATO carrying a mutation or a myr-TDTOMATO (control)
Cell circuarity Myr-TDTOMATO + vehicle	Cell circuarity DCC-TDTOMATO + vehicle	Cell circuarity Myr-TDTOMATO + NTN1	Cell circuarity) DCC-TDTOMATO + NTN1	Cell circuarity DCC(M743L)-TDTOMATO + NTN1	Cell circuarity DCC(V753M)-TDTOMATO + NTN1	Cell circuarity DCC(A893T)-TDTOMATO + NTN1	Cell circuarity DCC(V848R)-TDTOMATO + NTN1	Cell circuarity DCC(H857A)-TDTOMATO + NTN1	Cell circuarity DCC(V793G)-TDTOMATO + NTN1	Cell circuarity DCC(G805E)-TDTOMATO + NTN1	Cell circuarity DCC(M1217V;A1250T)-TDTOMATO + NTN1
0.191	0.066	0.184	0.104	0.176	0.188	0.34	0.088	0.203	0.213	0.448	0.127
0.583	0.026	0.163	0.522	0.251	0.317	0.518	0.635	0.148	0.288	0.246	0.217
0.532	0.147	0.207	0.182	0.043	0.189	0.164	0.116	0.074	0.252	0.129	0.207
0.415	0.105	0.163	0.235	0.112	0.234	0.104	0.317	0.094	0.117	0.03	0.066
0.216	0.122	0.195	0.084	0.256	0.456	0.233	0.041	0.232	0.441	0.181	0.077
0.137	0.062	0.129	0.063	0.225	0.2	0.1	0.077	0.12	0.293	0.18	0.251
0.181	0.032	0.279	0.192	0.098	0.137	0.184	0.187	0.567	0.606	0.281	0.554
0.154	0.085	0.17	0.235	0.181	0.112	0.119	0.252	0.048	0.339	0.381	0.134
0.614	0.129	0.251	0.052	0.053	0.132	0.148	0.228	0.134	0.228	0.236	0.11
0.498	0.3	0.108	0.089	0.52	0.186	0.232	0.091	0.199	0.424	0.265	0.119
0.354	0.017	0.163	0.109	0.278	0.142	0.178	0.593	0.27	0.247	0.339	0.081
0.111	0.012	0.094	0.73	0.451	0.122	0.1	0.34	0.267	0.124	0.042	0.716
0.265	0.012	0.339	0.404	0.08	0.224	0.28	0.487	0.24	0.19	0.131	0.095
0.476	0.014	0.239	0.128	0.062	0.091	0.2	0.236	0.081	0.33	0.459	0.094
0.465	0.016	0.153	0.127	0.053	0.088	0.37	0.391	0.066	0.325	0.279	0.134
0.779	0.454	0.186	0.127	0.502	0.09	0.291	0.13	0.091	0.445	0.405	0.159
0.139	0.228	0.044	0.676	0.601	0.132	0.094	0.092	0.581	0.25	0.194	0.064
0.542	0.177	0.093	0.229	0.242	0.12	0.128	0.161	0.281	0.178	0.05	0.264
0.625	0.15	0.049	0.612	0.063	0.475	0.053	0.152	0.219	0.165	0.263	0.488
0.537	0.324	0.248	0.566	0.126	0.3	0.184	0.26	0.181	0.159	0.122	0.241
0.237	0.297	0.302	0.618	0.201	0.348	0.124	0.181	0.114	0.363	0.138	0.139
0.105	0.015	0.149	0.477	0.089	0.126	0.12	0.227	0.188	0.224	0.276	0.082
0.046	0.206	0.119	0.826	0.163	0.149	0.011	0.237	0.354	0.236	0.265	0.116
0.231	0.021	0.077	0.284	0.16	0.037	0.1	0.149	0.103	0.24	0.163	0.343
0.223	0.078	0.127	0.52	0.134	0.078	0.07	0.09	0.4	0.079	0.107	0.261
0.148	0.679	0.171	0.103	0.087	0.161	0.048	0.461	0.157	0.181	0.188	0.04
0.07	0.328	0.083	0.636	0.068	0.05	0.418	0.172	0.475	0.142	0.027	0.1
0.106	0.126	0.083	0.151	0.151	0.066	0.096	0.072	0.056	0.276	0.038	0.009
0.149	0.174	0.057	0.576	0.195	0.257	0.139	0.059	0.07	0.352	0.098	0.008
0.27	0.119	0.14	0.616	0.288	0.2	0.108	0.189	0.058	0.498	0.094	0.135
0.078	0.219	0.118	0.508	0.143	0.135	0.224	0.138	0.059	0.108	0.185	0.373
0.152	0.081	0.237	0.425	0.099	0.183	0.184	0.285	0.048	0.178	0.036	0.234
0.251	0.151	0.226	0.322	0.09	0.154	0.056	0.37	0.076	0.122	0.344	0.172
0.153	0.143	0.092	0.485	0.177	0.04	0.235	0.347	0.054	0.087	0.668	0.473
0.37	0.051	0.297	0.796	0.095	0.063	0.096	0.101	0.058	0.262	0.637	0.132
0.352	0.061	0.353	0.191	0.055	0.327	0.117	0.424	0.039	0.162	0.052	0.132
0.356	0.132	0.254	0.35	0.073	0.251	0.317	0.739	0.204	0.121	0.084	0.029
0.232	0.154	0.404	0.51	0.129	0.223	0.077	0.199	0.396	0.044	0.173	0.122
0.235	0.225	0.184	0.055	0.069	0.162	0.16	0.103	0.151	0.533	0.214	0.095
0.484	0.146	0.408	0.139	0.044	0.02	0.125	0.048	0.138	0.315	0.042	0.08
0.383	0.052	0.129	0.226	0.088	0.13	0.103	0.257	0.241	0.182	0.026	0.197
0.356	0.114	0.219	0.317	0.112	0.101	0.04	0.102	0.131	0.073	0.1	0.23
0.287	0.076	0.43	0.074	0.124	0.193	0.021	0.073	0.041	0.167	0.028	0.375
0.187	0.099	0.311	0.13	0.087	0.317	0.504	0.083	0.478	0.137	0.105	0.088
0.358	0.106	0.073	0.124	0.024	0.111	0.024	0.314	0.254	0.042	0.068	0.112
0.031	0.271	0.051	0.063	0.173	0.689	0.107	0.337	0.57	0.173	0.023	0.09
0.352	0.134	0.186	0.109	0.113	0.239	0.068	0.552	0.363	0.071	0.142	0.236
0.066	0.091	0.105	0.117	0.078	0.156	0.045	0.302	0.416	0.016	0.048	0.062
0.221	0.303	0.147	0.153	0.26	0.093	0.177	0.079	0.083	0.042	0.086	0.11
0.31	0.168	0.656	0.032	0.163	0.131	0.051	0.38	0.112	0.142	0.13	0.399
0.226	0.502	0.559	0.031	0.058	0.283	0.056	0.334	0.153	0.084	0.027	0.249
0.12	0.07	0.518	0.015	0.112	0.655	0.14	0.113	0.063	0.141	0.032	0.085
0.091	0.171	0.386	0.062	0.045	0.088	0.087	0.198	0.068	0.042	0.393	0.074
0.139	0.052	0.813	0.09	0.163	0.022	0.05	0.105	0.139	0.042	0.045	0.03
0.101	0.053	0.109	0.23	0.074	0.173	0.066	0.062	0.308	0.064	0.232	0.291
0.178		0.123	0.202	0.409	0.302	0.05	0.829	0.212	0.062	0.163	0.18
0.173		0.381	0.117	0.117	0.34	0.118	0.228	0.128	0.131	0.04	0.273
0.568		0.062	0.051	0.15	0.032	0.049	0.109	0.149	0.039	0.104	0.182
0.31		0.064	0.159	0.065	0.048	0.02	0.473	0.082	0.312	0.063	0.346
0.365		0.107	0.097	0.447	0.075	0.037	0.094	0.161	0.526	0.183	0.065
0.145		0.137	0.164	0.411	0.152	0.092	0.159	0.064	0.31	0.321	0.04
0.174		0.102	0.152	0.105	0.074	0.357	0.293	0.04	0.312	0.092	0.064
0.061		0.074	0.095	0.203	0.027	0.087	0.299	0.194	0.465	0.058	0.029
0.32		0.141	0.015	0.096	0.054	0.142	0.093	0.095	0.236	0.34	0.022
0.215		0.131	0.56	0.05	0.093	0.144	0.293	0.335	0.044	0.084	0.364
0.282		0.072	0.305	0.115	0.067	0.115	0.135	0.113	0.104	0.259	0.098
0.055		0.148	0.017	0.066	0.115	0.169	0.149	0.038	0.07	0.109	0.086
0.054		0.082	0.107	0.117	0.052	0.107	0.112	0.031	0.175	0.101	0.167
0.494		0.209	0.088	0.257	0.1	0.042	0.232	0.127	0.156	0.24	0.166
0.122		0.139	0.1	0.365	0.172	0.158	0.074	0.059	0.237	0.206	0.128
0.12		0.092	0.097	0.07	0.075	0.142	0.191	0.346	0.262	0.143	0.035
0.074		0.095	0.02	0.075	0.145		0.095	0.178	0.288	0.117	0.192
0.093		0.092	0.254	0.079	0.226		0.083	0.031	0.035	0.122	0.219
0.279		0.057	0.069	0.032	0.092		0.112	0.024	0.253	0.046	0.342
0.23		0.059	0.121	0.1	0.093		0.225	0.09	0.114	0.16	0.04
0.446		0.171	0.046	0.031	0.264		0.098	0.101		0.092	0.138
0.127		0.265	0.23	0.109	0.194		0.047	0.068		0.116	0.064
0.186		0.117	0.078		0.075		0.104	0.065		0.082
0.392		0.103	0.139		0.047		0.153	0.12		0.399
0.238		0.378	0.268		0.114		0.316	0.125		0.094
0.184		0.097	0.234		0.158		0.25			0.15
0.174		0.074	0.191		0.278		0.058			0.113
0.165		0.129	0.087		0.285		0.077			0.062
0.307		0.226	0.495		0.524		0.107			0.107
0.259		0.109	0.315		0.065		0.12			0.097
0.152		0.096	0.288		0.073		0.146			0.066
0.204		0.207	0.418		0.046					0.111
0.532		0.224	0.042		0.073					0.023
0.319		0.1	0.045		0.155					0.098
0.05		0.104	0.128		0.058					0.089
		0.429	0.167		0.138					0.34
		0.518	0.101		0.069					0.085
		0.178	0.498		0.382
		0.186	0.054		0.276
		0.443	0.203		0.061
		0.42	0.141
		0.201	0.054
		0.245	0.161
		0.043	0.013
		0.148	0.053
			0.011
			0.026
			0.043
			0.053
			0.01
			0.019
			0.029
			0.061
			0.058
			0.052
			0.13
			0.079
			0.138
			0.07
			0.031
			0.013
			0.016
			0.116
			0.096
			0.255
			0.125
			0.197
			0.136
			0.067
			0.053
			0.08
			0.111
			0.06
			0.073
			0.08
			0.214
			0.076
			0.129
			0.176
			0.33
			0.036
			0.071
			0.323
			0.382
			0.154
			0.246
			0.188
			0.153
			0.093
			0.077
			0.02
			0.254
			0.069
			0.121
			0.046
			0.23
			0.078
			0.139
			0.268
			0.234
			0.191
			0.087
			0.495
			0.315
			0.288
			0.418
			0.042
			0.045
			0.128
			0.167
			0.101
			0.498
			0.054
			0.203
			0.141
			0.054
			0.161
			0.013
			0.053
			0.011
			0.026
			0.043
			0.053
			0.01
			0.019
			0.029
			0.061
			0.058
			0.052
			0.13
			0.079
			0.138
			0.07
			0.031
			0.013
			0.016

## Sheet: Figure 7-S7I
Figure S7I: Number of cleaved-caspase3-positive/TDTOMATO-positive cell nuclei following DCC:TDTOMATO or MYR-TDTOMATO (control) expression in U251 and N2A cells.
U251-TDT	U251-DCC	N2A-TDT	N2A-DCC
0	2	3	3
1	0	0	1
0	1	2	0
