# Supplementary material for: DCC regulates astroglial development essential for telencephalic morphogenesis and corpus callosum formation
Source: eLife. 2021 Apr 19;10:e61769. doi: 10.7554/eLife.61769 (PMC8116049; doi:10.7554/eLife.61769)
Supplement: Figure 7—source data 1. [file elife-61769-fig7-data1.xlsx]

## Sheet: Figure 7D
Figure 7D: U251 cell area following overexpression of DCC:TDTOMATO, DCCKANGA:TDTOMATO or a myr-TDTOMATO (control) with vehicle or 100ng/mL NTN1.
Cell area (µm2) Myr-TDTOMATO + vehicle	Cell area (µm2) DCC-TDTOMATO + vehicle	Cell area (µm2) DCCKANGA-TDTOMATO + vehicle	Cell area (µm2) Myr-TDTOMATO + NTN1	Cell area (µm2) DCC-TDTOMATO + NTN1	Cell area (µm2) DCCKANGA-TDTOMATO + NTN1
471.757	638.446	738.067	1393.83	1165.49	3459.35
971.851	2126.79	2912.02	1510.26	617.415	821.637
1207.34	1504.17	700.643	914.753	2167.36	1031.06
912.304	1375.04	1118.74	703.868	2314.96	888.278
748.733	1858.97	848.031	1353.16	3667.2	1162.1
818.519	1849.65	1635.94	1098.52	1223.93	664.673
1862	1210.32	755.176	843.18	786.71	997.353
1576.03	625.472	677.967	968.165	1634.37	586.487
744.444	525.025	866.135	790.311	1644.55	1342.96
1277.12	2132.33	1476.82	1390.44	3210.01	1343.01
3997.37	1914.43	1308.84	2309.33	2508.91	532.118
173.681	1197.1	1337.28	869.454	1109.35	1185.11
459.326	1957.39	263.327	468.57	2638.73	509.646
812.35	1579.84	500.838	564.15	1089.43	3507.41
503.736	1729.85	373.009	1099.59	1266.5	1644.19
379.219	1115.77	631.343	983.352	2924.56	1012.5
747.037	1655.59	647.262	2044.89	2550.73	1051.02
1417.61	2220.88	661.178	999.391	4614	705.598
1727.66	2155.18	598.406	2921.62	1383.28	757.424
406.633	759.732	1071.14	688.85	528.155	497.168
622.476	1568.13	322.796	1058.71	2176.71	695.597
1326.04	555.447	1123.81	632.458	1285.17	1287.48
1327.68	994.106	1513.61	707.102	1685.66	893.75
833.616	688.181	496.452	2100.16	1745.85	337.682
1921.6	1941.24	1332.54	972.796	436.798	701.597
1545.56	1823.16	408.417	253.006	619.409	1780.17
961.298	1232.07	714.826	1969.19	2561.12	414.555
757.217	1601.35	587.856	621.493	2125.8	583.843
1418.15	1486.32	349.62	1258.03	1751.76	2411.29
811.521	1232.84	1104.73	838.125	1048.2	1036.82
652.779	1513.51	652.267	362.515	431.988	3333.29
864.16	1379.37	2170.65	1096.89	709.563	509.096
1533.58	1896.99	595.957	683.443	4770.02	1265.17
1355.21	2359.72	387.917	679.009	1629.59	591.228
1894.21	1090.11	1363.41	1063.75	549.456	651.649
656.924	2526.89	1251.5	1320.12	802.337	1606.61
498.405	1418.63	948.032	856.766	1399.83	1252.86
2991.68	3027.28	899.176	836.979	1265.32	525.486
1829.04	1609.36	752.51	680.874	1048.6	425.155
691.208	2133.26	419.905	1013.93	572.493	186.564
1197.51	1110.31	1234.71	1021.8	1317.99	588.845
522.535	527.094	973.732	1193.58	907.968	686.027
668.761	1569.81	909.39	1637.21	1193.12	1329.41
1336.25	1525.91	1423.2	502.013	2834.19	472.737
354.075	2359.78	1404.04	841.927	1375.54	510.889
553.896	3132.23	767.396	732.654	1420.23	656.905
882.535	763.509	3138.13	880.098	837.575	785.265
665.511	2899.18	1259	1773.66	833.164	449.995
930.411	2349.69	3268.01	699.079	2377.71	1352.01
815.904	1445.15	1267.47	540.291	1425.79	543.678
629.66	1014.37	2668.09	533.047	2346.34	902.112
486.112	638.719	1308.38	330.551	1979.01	1725.61
706.464	492.295	641.064	2287.59	1020.56	687.333
775.315	197.739	473.459	730.503	1655.06	2158.13
783.419	1050.87	814.372	427.419	1873.66	3229.74
986.976	553.155	502.735	510.277	5172.23	679.499
553.286	1135.66	567.642	651.821	503.479	1084.49
482.002	1912.55	421.701	277.748	902.605	638.223
468.071	1127.88	869.476	446.962	3254.36	1498.61
753.992	1657.07	433.887	554.128	758.693	395.085
376.004	1420.87	567.177	553.412	1643.63	647.375
498.041	992.427	1180.37	721.689	1561.8	742.676
617.566	1626.61	849.011	568.76	1754.27	508.273
774.36	1865.93	398.426	658.983	5689.08	670.073
1066.57	1984.01	227.825	659.194	681.072	1984.59
817.213	816.064	311.439		2654.33	597.546
1307.02	1455.51	464.272		1250.08	663.904
	956.686	1092.01		498.757	1110.03
	840.338	719.809		5046.45	1801.21
	1136.77	397.66		524.368	805.304
	1273.97	743.712		290.791	700.458
	2405.16	420.794		1704.79
		747.185		1062.21
		927.199		1281.91
		1533.94		679.104
		371.753		1554.12
		872.038		1653.11
				1366
				464.947
				1051.17
				337.073
				320.177

## Sheet: Figure 7E
Figure 7E: U251 cell perimenter following overexpression of DCC:TDTOMATO, DCCKANGA:TDTOMATO or a myr-TDTOMATO (control) with vehicle or 100ng/mL NTN1.
Cell perimeter (µm) Myr-TDTOMATO + vehicle	Cell perimeter (µm) DCC-TDTOMATO + vehicle	Cell perimeter (µm) DCCKANGA-TDTOMATO + vehicle	Cell perimeter (µm) Myr-TDTOMATO + NTN1	Cell perimeter (µm) DCC-TDTOMATO + NTN1	Cell perimeter (µm) DCCKANGA-TDTOMATO + NTN1
1021.27	888.595	197.251	1188.15	738.559	312.357
329.068	955.363	734.076	648.516	840.36	821.769
477.945	786.564	755.397	679.406	371.08	579.472
639.22	1011.86	255.958	279.014	972.403	507.908
530.458	1366.1	772.188	421.205	433.002	176.325
775.847	1279.31	357.837	329.705	674.969	378.169
464.031	1493.35	449.82	463.754	435.4	604.297
531.229	1490.04	278.481	427.18	332.665	691.129
662.991	1153.83	206.068	502.799	543.649	381.912
384.342	883.761	246.011	371.869	620.843	748.193
734.895	532.935	423.414	981.087	635.812	578.7
467.262	814.385	959.71	162.167	211.055	582.273
385.444	465.043	384.552	504.045	390.484	486.106
1229.79	840.936	321.772	301.523	854.08	717.127
307.008	838.59	569.519	422.224	778.498	417.258
862.59	1609.7	475.902	628.632	947.431	410.936
1235.65	1674.23	406.343	248.293	615.484	1481.08
1199.67	784.057	980.344	711.629	1148.73	511.849
565.725	1892.28	461.187	193.646	1005.1	588.135
455.97	568.714	193.547	397.223	709.431	420.223
917.839	714.998	455.886	353.172	1332.53	302.701
347.52	708.22	481.859	564.501	432.789	425.624
282.24	543.323	639.942	458.075	1371.2	519.752
509.586	525.493	670.836	575.199	598.124	280.965
322.961	179.722	854.474	535.83	424.543	279.62
326.722	927.58	225.769	651.128	2456.61	324.187
877.453	265.467	458.173	688.441	1425.82	407.993
249.288	713.803	506.691	406.32	1773.11	616.177
440.61	1036.03	1221.27	1198.74	1020.78	250.47
644.383	815.817	1033.95	215.182	772.996	578.926
430.117	376.662	1105.42	364.408	1308.53	336.605
582.833	1027.65	401.915	750.135	1274.3	336.633
591.301	706.858	527.351	693.865	1443.59	479.022
366.291	1100.92	277.26	741.235	523.163	349.181
630.782	751.319	554.01	661.232	392.905	1218.89
621.303	694.093	246.433	302.106	798.904	2996.71
435.134	799.798	536.903	231.84	410.3	419.95
544.684	475.978	327.311	195.812	327.339	512.647
367.554	318.624	809.972	778.218	942.53	709.873
556.14	724.319	496.892	1067.72	606.412	842.031
798.841	401.08	416.246	812.806	1142.72	321.7
278.658	682.419	349.487	612.573	738.428	1364.52
597.78	971.547	532.072	401.422	644.234	603.406
735.291	694.102	347.598	512.463	676.546	918.497
143.268	577.485	465.742	857.748	589.292	583.716
281.71	630.044	656.667	988.954	1323.22	663.738
268.106	811.107	750.203	507.075	530.994	406.903
229.175	1404.18	535.192	370.602	400.184	630.211
179.738	1012.73	1379.79	311.869	710.387	375.959
454.037	603.737	106.522	673.291	1266.88	619.687
889.275	1002.35	229.458	746.166	1120.76	665.29
441.815	493.833	187.838	298.667	747.434	360.848
250.389	1012.47	426.479	311.699	539.711	911.811
387.953	554.671	483.199	243.829	735.88	219.549
380.251	807.608	269.397	488.211	691.858	940.494
464.417	783.144	337.678	280.43	1143.92	988.611
314.252	1050.87	361.459	282.855	1147.35	880.8
215.342	705.129	215.369	266.626	638.948	529.855
191.467	533.404	310.014	279.795	1340.84	439.591
162.161	711.321	152.585	219.075	533.636	463.636
340.167	947.092	218.796	175.497	943.13	215.4
140.767	637.072	574.915	293.898	1131.42	360.548
403.34	1037.97	416.732	137.084	1932.45	263.021
195.84	600.262	193.474	216.928	1742.2	233.961
293.19	440.708	75.1838	190.297	944.695	461.152
700.314	323.737	88.7465	205.283	291.879	380.105
401.543	705.879	207.927	206.664	1409.19	370.379
501.142	429.105	358.424		738.096	461.092
	405.772	337.435		707.19	548.34
	479.298	201.5		318.969	356.356
	709.364	424.196		127.438	320.409
	938.208	144.555		1098.19
		269.902		590.764
		459.481		449.99
		269.118		549.264
		112.278		444.633
		247.425		515.508
				573.477
				169.601
				546.931
				144.579
				174.827

## Sheet: Figure 7F
Figure 7E: U251 cell circularity following overexpression of DCC:TDTOMATO, DCCKANGA:TDTOMATO or a myr-TDTOMATO (control) with vehicle or 100ng/mL NTN1.
Cell circularity Myr-TDTOMATO + vehicle	Cell circularity (µm) DCC-TDTOMATO + vehicle	Cell circularity (µm) DCCKANGA-TDTOMATO + vehicle	Cell circularity (µm) Myr-TDTOMATO + NTN1	Cell circularity (µm) DCC-TDTOMATO + NTN1	Cell circularity (µm) DCCKANGA-TDTOMATO + NTN1
0.021	0.02	0.104	0.009	0.04	0.064
0.047	0.021	0.026	0.061	0.008	0.013
0.034	0.028	0.033	0.027	0.057	0.048
0.041	0.023	0.095	0.061	0.034	0.044
0.059	0.016	0.028	0.207	0.142	0.136
0.017	0.008	0.04	0.08	0.048	0.062
0.112	0.014	0.044	0.062	0.069	0.061
0.069	0.008	0.095	0.044	0.049	0.011
0.027	0.029	0.103	0.035	0.03	0.05
0.064	0.026	0.229	0.191	0.156	0.054
0.033	0.094	0.046	0.013	0.051	0.039
0.047	0.021	0.03	0.121	0.155	0.124
0.055	0.031	0.051	0.097	0.066	0.027
0.007	0.028	0.047	0.086	0.024	0.031
0.204	0.027	0.053	0.089	0.026	0.043
0.023	0.011	0.069	0.027	0.015	0.048
0.013	0.014	0.072	0.074	0.019	0.009
0.017	0.016	0.012	0.027	0.013	0.06
0.026	0.01	0.044	0.229	0.011	0.019
0.03	0.091	0.141	0.054	0.03	0.03
0.045	0.036	0.075	0.107	0.02	0.026
0.19	0.025	0.053	0.052	0.092	0.041
0.109	0.027	0.028	0.051	0.009	0.032
0.058	0.022	0.04	0.032	0.029	0.212
0.063	0.077	0.024	0.03	0.058	0.076
0.079	0.015	0.189	0.03	0.005	0.061
0.022	0.099	0.188	0.027	0.009	0.05
0.072	0.028	0.062	0.091	0.009	0.026
0.036	0.022	0.028	0.014	0.024	0.09
0.027	0.021	0.015	0.136	0.021	0.051
0.045	0.057	0.027	0.08	0.012	0.06
0.034	0.025	0.102	0.016	0.014	0.1
0.029	0.038	0.029	0.023	0.031	0.095
0.044	0.014	0.077	0.041	0.023	0.071
0.031	0.041	0.033	0.02	0.073	0.018
0.039	0.048	0.104	0.074	0.064	0.005
0.061	0.024	0.025	0.125	0.057	0.048
0.032	0.035	0.087	0.108	0.193	0.052
0.076	0.065	0.056	0.049	0.022	0.016
0.076	0.051	0.036	0.025	0.06	0.027
0.031	0.15	0.081	0.027	0.055	0.048
0.12	0.032	0.087	0.051	0.016	0.023
0.045	0.026	0.073	0.071	0.08	0.028
0.093	0.041	0.079	0.034	0.034	0.015
0.106	0.065	0.039	0.023	0.018	0.033
0.073	0.035	0.025	0.014	0.036	0.033
0.142	0.032	0.033	0.041	0.052	0.05
0.121	0.014	0.057	0.089	0.048	0.032
0.148	0.026	0.009	0.102	0.054	0.052
0.046	0.026	0.292	0.039	0.018	0.044
0.023	0.02	0.12	0.052	0.037	0.038
0.041	0.029	0.133	0.122	0.028	0.051
0.097	0.012	0.044	0.061	0.034	0.018
0.059	0.028	0.035	0.119	0.038	0.133
0.067	0.037	0.114	0.058	0.043	0.05
0.046	0.037	0.066	0.117	0.031	0.021
0.126	0.014	0.103	0.067	0.024	0.016
0.15	0.04	0.114	0.09	0.034	0.047
0.165	0.066	0.114	0.105	0.018	0.046
0.224	0.041	0.234	0.073	0.048	0.044
0.082	0.02	0.149	0.182	0.018	0.175
0.238	0.031	0.045	0.081	0.029	0.072
0.038	0.019	0.061	0.37	0.009	0.092
0.202	0.065	0.134	0.193	0.019	0.154
0.113	0.128	0.506	0.197	0.019	0.117
0.027	0.098	0.497	0.197	0.078	0.052
0.064	0.037	0.135	0.194	0.014	0.061
0.065	0.065	0.107		0.03	0.066
	0.064	0.079		0.042	0.075
	0.062	0.123		0.065	0.08
	0.032	0.052		0.225	0.086
	0.034	0.253		0.018
		0.129		0.038
		0.055		0.08
		0.266		0.028
		0.371		0.099
		0.179		0.078
				0.052
				0.203
				0.044
				0.203
				0.132

## Sheet: Figure 7I
Figure 7I: N2A cell area following overexpression of DCC:TDTOMATO or a myr-TDTOMATO (control)
Cell area (µm2) Myr-TDTOMATO	Cell area (µm2) DCC-TDTOMATO
495.645	1154
446.416	1110.6
601.431	475.95
627.796	760.4
647.038	971.54
856.577	1131.6
573.374	789.21
911.272	392.95
355.175	673.31
285.474	1013.2
525.384	1117.3
419.906	668.45
765.669	778.44
710.504	1072.2
281.802	1327.9
236.784	334.11
730.532	496.33
494.321	557.79
449.653	1155.4
463.967	1121.5
640.59	240.28
946.883	1850.6
1641.99	2200.2
526.604	1072.1
532.438	2407
628.31	540.22
762.421	530.69
1093.94	1554.1
1243.47	624.7
965.34	971.87
564.13	1132.2
971.786	844.92
356.585	3332.5
540.937	4186.3
624.43	3696
618.227	3227
437.521	1639.1
540.761	1150.1
762.447	847
406.491	1044.9
713.655	2149
613.198	2635.8
693.731	1581
633.859	1800.7
1269.09	1413.5
791.264	2249.3
437.571	933.74
696.816	2253.8
744.995	1355.6
712.842	1064.2
791.8	527.75
682.776	1718.6
983.68	1116.2
2412.03	3338.4
2508.01	857.42
961.635
705.465
485.251
991.273
568.438
518.696
850.453
692.073
519.755
561.195
645.783
673.045
1095.61
353.928
959.467
586.783
878.432
792.581
557.471
324.275
500.727
768.291
1081.46
501.205
445.929
1211.73
720.36
629.384
614.421
614.797
756.676
360.693
316.862
561.81
995.919
