# Supplementary material for: DCC regulates astroglial development essential for telencephalic morphogenesis and corpus callosum formation
Source: eLife. 2021 Apr 19;10:e61769. doi: 10.7554/eLife.61769 (PMC8116049; doi:10.7554/eLife.61769)
Supplement: Figure 8—source data 1. [file elife-61769-fig8-data1.xlsx]

## Sheet: Figure 8E
Figure 8E: N2A cell area following overexpression of DCC:TDTOMATO, DCC:TDTOMATO carrying a mutation or a myr-TDTOMATO (control)
Cell area (µm2) Myr-TDTOMATO + NTN1	Cell area (µm2) DCC-TDTOMATO + NTN1	Cell area (µm2) DCC(M743L)-TDTOMATO + NTN1	Cell area (µm2) DCC(V753M)-TDTOMATO + NTN1	Cell area (µm2) DCC(A893T)-TDTOMATO + NTN1	Cell area (µm2) DCC(V848R)-TDTOMATO + NTN1	Cell area (µm2) DCC(H857A)-TDTOMATO + NTN1	Cell area (µm2) DCC(V793G)-TDTOMATO + NTN1	Cell area (µm2) DCC(G805E)-TDTOMATO + NTN1	Cell area (µm2) DCC(M1217V;A1250T)-TDTOMATO + NTN1
381.303	1068.28	605.009	275.038	267.778	245.145	221.06	535.035	240.798	801.378
532.035	757.427	574.314	237.945	180.671	80.309	390.79	403.465	516.04	588.73
408.108	1952.38	722.128	445.963	368.661	154.716	525.7	877.237	554.644	766.737
285.522	2635.95	546.727	170.584	707.267	1815.73	662.941	345.319	602.72	485.003
511.114	5188.3	524.923	130.041	894.626	823.293	516.835	1047.55	965.001	686.052
712.239	2867.47	237.1	306.698	338.692	778.139	277.326	397.315	305.853	486.447
1614.97	2740.76	678.861	388.706	338.854	628.932	462.216	316.674	227.508	368.388
731.953	2109.02	662.36	618.948	562.348	405.532	497.643	452.958	967.453	499.967
1068.84	3964.48	695.96	347.104	279.701	508.926	499.984	835.43	496.362	500.65
1154.06	1295.7	266.488	296.031	356.986	179.45	426.132	842.459	364.903	450.234
688.702	1554.86	438.866	389.791	512.47	343.867	502.845	536.034	373.137	411.852
404.663	479.321	317.143	422.852	576.56	512.129	339.29	504.391	466.623	540.304
613.055	637.204	1328.94	242.882	354.424	377.74	457.024	471.039	239.184	618.999
450.362	275.188	627.429	391.004	382.096	388.544	453.189	1347.76	738.586	515.989
431.092	286.025	490.606	881.9	235.972	671.84	429.241	742.071	1092.66	580.045
510.812	375.528	170.507	472.79	305.297	220.044	402.371	772.297	354.629	339.571
956.95	516.076	254.77	386.153	768.65	610.834	782.793	937.244	245.316	438.67
712.893	991.885	203.671	414.141	481.612	921.418	227.594	841.485	392.806	643.34
1281.15	306.109	613.909	169.158	368.986	462.498	387.306	1175.81	319.526	539.126
394.982	302.169	842.203	188.648	253.344	620.741	176.093	418.377	384.154	503.34
350.005	236.756	179.766	164.025	723.418	420.418	279.795	278.881	532.789	366.193
440.848	215.801	515.408	524.871	575.996	171.43	1619.4	529.637	237.014	419.214
583.408	165.778	424.449	665.52	1241.16	1460.53	296.526	324.77	327.751	407.12
913.037	939.465	327.939	511.684	585.16	1091.69	211.648	2158.19	633.475	483.543
779.227	497.41	620.502	910.904	546.249	1016.45	347.83	1060.14	330.629	921.546
237.854	309.57	342.159	290.718	831.45	236.555	1375.62	641.581	351.05	376.647
584.59	386.114	483.662	418.496	212.835	385.561	582.889	248.86	293.281	562.57
932.164	304.441	319.543	287.37	431.35	359.627	929.079	457.553	1011.47	336.488
734.568	205.76	273.859	401.432	260.279	348.462	999.062	925.902	733.412	315.674
500.444	245.859	343.637	244.205	547.308	1462.93	636.123	247.075	290.652	385
602.66	1154.22	441.181	524.427	263.909	1483.05	301.625	330.715	727.603	830.135
664.717	271.675	562.69	1181.94	327.777	907.471	328.793	203.722	497.049	902.193
703.176	398.955	652.658	414.764	290.454	378.436	1036.58	281.383	604.749	493.057
669.253	258.683	474.285	380.61	401.927	240.009	580.173	282.793	470.034	702.775
438.038	286.998	613.661	616.701	971.057	228.911	639.642	469.818	343.09	715.364
464.292	940.571	1340.38	400.629	495.235	772.27	472.542	213.886	1038.03	603.976
306.715	1624.02	451.207	673.173	194.592	687.076	793.7	928.43	239.48	706.601
473.67	498.055	338.504	1193.88	687.274	609.895	782.665	390.192	289.252	953.719
717.773	416.013	462.285	417.991	303.538	329.611	493.014	347.395	709.707	531.414
341.929	472.373	685.847	1287.32	469.989	378.864	665.759	814.309	771.331	464.164
959.271	275.129	361.581	672.181	565.269	394.764	654.887	576.543	706.858	393.412
1035.38	297.727	839.956	794.977	426.75	733.546	1115.39	493.757	920.186	641.905
242.95	534.969	376.16	381.605	629.66	601.731	268.256	373.88	1139.32	736.494
586.621	632.099	556.558	288.146	102.092	659.03	865.1	540.364	178.041	383.274
847.003	996.621	608.724	733.596	839.971	331.564	547.675	207.147	600.675	905.925
942.044	593.525	229.447	485.658	208.157	1126.26	473.635	251.627	362.703	588.773
887.247	373.374	562.451	428.292	266.009	730.402	451.985	153.178	426.674	1046.85
1156.34	231.878	641.504	486.094	1054.48	363.734	790.77	211.802	156.457	626.408
1406.12	329.746	237.86	752.363	1227.9	612.376	632.912	388.954	341.857	451.46
318.143	646.608	540.612	339.443	499.974	751.517	272.22	233.521	372.024	253.788
349.854	1009.97	453.437	268.742	633.96	1030.29	411.176	277.685	353.978	1307.32
341.86	824.188	448.269	202.675	616.986	472.188	431.41	1111.83	390.012	726.58
480.724	750.402	1268.53	525.204	646.617	188.334	641.168	513.299	506.68	1289.83
299.327	386.34	1180.87	1315.49	1539.86	696.799	930.136	812.139	725.952	672.316
946.246	210.194	952.792	605.168	1449.38	152.853	391.629	1175.83	355.528	728.701
507.26	219.397	326.326	177.907	1466.71	168.661	1022	336.138	427.513	694.134
217.874	1189.38	830.189	147.723	731.433	393.247	500.41	700.554	656.926	697.311
649.037	699.515	775.732	2030.84	1430.26	246.471	465.223	1143.93	538.783	1123.34
1102.69	274.986	559.226	492.012	601.061	669.055	434.126	378.902	222.23	498.323
549.78	208.199	938.543	396.156	501.316	214.452	815.236	725.382	345.261	199.624
385.368	384.882	962.565	484.082	1106.88	459.599	1149.66	494.065	525.917	366.685
400.296	313.778	1149.26	692.03	262.925	669.181	670.279	409.693	429.273	1458.23
870.389	378.738	754.626	678.418	879.676	491.559	1011.25	780.2	292.865	292.907
774.927	1537.67	658.837	823.685	685.559	374.011	1215.52	796.628	333.308	739.849
1098.4	311.741	553.342	882.065	1100.53	565.597	299.143	1124.29	194.461	342.495
1121.12	284.248	579.46	468.274	672.55	262.874	1085.91	929.633	738.667	944.025
556.385	1039.39	578.849	597.029	450.412	390.431	282.094	493.914	673.414	1617.13
657.941	359.719	578.656	1138.58	449.85	411.411	692.306	671.896	582.872	1164.13
503.118	881.361	374.648	1345.39	925.727	510.46	299.244	1024.89	245.08	489.95
589.393	1095.16	308.397	784.877	700.613	522.011	491.559	1395.97	381.932	321.59
597.339	824.859	381.655	608.898	1153.15	1080.94	921.402	210.898	452.524	232.18
578.354	899.466	343.584	197.026		644.747	238.19	1139.99	648.033	251.995
562.663	1061.09	573.476	179.617		592.939	722.8	1418.85	496.882	2057.35
939.649	802.688	901.537	858.797		774.843	436.54	323.115	630.129	592.176
824.859	870.289	260.243	766.545		423.632	626.014	236.044	668.25	660.497
1921.23	929.759	857.984	165.468		680.563	302.814	292.982	713.152
228.173	574.398	681.217	222.591		495.54	580.676	672.324	535.79
497.695	1645.29		1600.95		414.001		230.78	367.104
913.741	1869.6		846.995		256.429		159.894	595.998
331.279	1145.56		431.72		323.652		281.197	534.6
484.183	927.437		748.315		342.88		270.351
924.042	1131.26		285.799		317.114		495.633
693.136	1104.41		333.995		566.494		470.453
592.964	1176.34		226.379		789.914		720.931
667.63	837.314		1690.46		744.844		472.758
736.664	1237.48		923.313		315.689		349.946
630.615	812.839		884.546		471.585
510.972	2241.91		1126.46		582.252
518.499	659.013		630.9		391.864
562.219	563.593		771.03		565.463
188.728	786.771		367.724		309.017
182.525	946.338		1532.55		518.473
269.01	566.711		508.616
587.884	1575.8		576.778
520.711	701.225		778.624
509.019	888.134
775.715	850.935
732.456	1506.98
800.802	1657.34
726.916	1039.5
	1593.42
	1391.75
	838.597
	460.604
	915.207
	929.624
	1241.9
	1034.73
	775.154
	1119.78
	564.901
	643.247
	419.382
	850.029
	969.799
	833.056
	999.832
	1251.01
	1685.63
	1651.37
	787.661
	2039.15
	1639.07
	1306.12
	1087.82
	1048.63
	1174.01
	1484.93
	1575.05
	1450.05
	1011.8
	1930.28
	1221.94
	1955.56
	559.248
	1634.05
	939.072
	886.495
	2507.19
	1770.67
	1665.17
	1871.86
	1323.3
	1280.7
	1000.57
	1657.34
	1039.5
	1593.42
	1391.75
	838.597
	460.604
	915.207
	929.624
	1241.9
	1034.73
	775.154
	1119.78
	564.901
	643.247
	419.382
	850.029
	969.799
	833.056
	999.832
	1145.56
	927.437
	1131.26
	1104.41
	1176.34
	837.314
	1237.48
	812.839
	2241.91
	659.013
	563.593
	786.771
	946.338
	566.711
	1575.8
	701.225
	888.134
	850.935
	1506.98
	899.466
	1061.09
	802.688
	870.289
	929.759
	574.398
	1645.29
	1869.6
